# Supplementary material for: Quantifying the regulatory effect size of cis-acting genetic variation using allelic fold change
Source: Genome Res. 2017 Nov;27(11):1872–84. doi: 10.1101/gr.216747.116 (PMC5668944; doi:10.1101/gr.216747.116)
Supplement: Supplemental Material [file supp_gr.216747.116_Supplemental_Table_S1.xlsx]

## Sheet: GTEx_Double_eQTL_Effects.txt
tissue	eGene	snp1	snp2	Selected_Model	dBIC	dBIC_LoCI_Bca	dBIC_HiCI_Bca	s_10	s_10_LoCI	s_10_HiCI	s_01	s_01_LoCI	s_01_HiCI	s_11	s_11_LoCI	s_11_HiCI
ADPSBQ	ENSG00000122477.8	1_100321898_C_T_b37	1_100345975_C_T_b37	Independent	5.37061	NaN	NaN	0.786566	0.483089	1.09004	-0.316622	-0.509624	-0.12362	0.469944	NaN	NaN
ADPSBQ	ENSG00000225169.1	1_101429844_T_G_b37	1_100671755_A_C_b37	Independent	1.56962	NaN	NaN	-1.36238	-1.97564	-0.749122	0.588882	0.325342	0.852421	-0.7735	NaN	NaN
ADPSBQ	ENSG00000230946.3	1_101894428_G_C_b37	1_102080647_C_T_b37	Independent	3.52392	NaN	NaN	0.905824	0.574541	1.23711	0.573349	0.293283	0.853415	1.47917	NaN	NaN
ADPSBQ	ENSG00000273382.1	1_109639190_G_T_b37	1_110489829_G_A_b37	Independent	5.55684	NaN	NaN	0.385761	0.231391	0.54013	-1.37685	-2.3528	-0.400891	-0.991086	NaN	NaN
ADPSBQ	ENSG00000213366.8	1_110230073_C_G_b37	1_110182405_T_C_b37	Independent	3.71047	NaN	NaN	0.335486	0.113471	0.557501	-0.300578	-0.488838	-0.112318	0.0349082	NaN	NaN
ADPSBQ	ENSG00000134222.12	1_110292091_G_C_b37	1_109836223_G_A_b37	Independent	3.49797	NaN	NaN	-0.378709	-0.509283	-0.248135	0.374442	0.184671	0.564213	-0.00426684	NaN	NaN
ADPSBQ	ENSG00000156171.10	1_111737398_G_A_b37	1_111728610_T_C_b37	Independent	5.58537	NaN	NaN	0.211632	0.128463	0.294802	0.248749	0.164918	0.33258	0.460382	NaN	NaN
ADPSBQ	ENSG00000134216.14	1_111844599_A_C_b37	1_111850714_G_A_b37	Independent	5.5422	NaN	NaN	1.57798	1.28018	1.87577	0.607913	0.300843	0.914984	2.18589	NaN	NaN
ADPSBQ	ENSG00000231246.1	1_112888105_C_G_b37	1_112703397_A_G_b37	Independent	-2.31262	-23.3932	5.1867	0.697111	0.507654	0.886569	0.317431	0.126507	0.508355	1.01454	NaN	NaN
ADPSBQ	ENSG00000116489.8	1_113136229_T_C_b37	1_113174107_G_C_b37	Independent	5.66988	NaN	NaN	0.0878355	0.0519706	0.1237	0.212209	0.101271	0.323148	0.300045	NaN	NaN
ADPSBQ	ENSG00000188761.7	1_113846943_G_T_b37	1_114507908_A_AT_b37	Independent	5.35001	NaN	NaN	0.842319	0.50394	1.1807	-1.05689	-1.9533	-0.16047	-0.214566	NaN	NaN
ADPSBQ	ENSG00000231050.1	1_1176028_T_C_b37	1_1823524_G_C_b37	Independent	5.03573	NaN	NaN	-1.46786	-1.96588	-0.969849	-0.859666	-1.53896	-0.180369	-2.32753	NaN	NaN
ADPSBQ	ENSG00000162572.15	1_1212226_CAT_C_b37	1_1215424_T_C_b37	Independent	5.46806	NaN	NaN	0.836701	0.608811	1.06459	-0.416962	-0.576561	-0.257363	0.41974	NaN	NaN
ADPSBQ	ENSG00000236933.1	1_121256216_A_G_b37	1_120396298_C_T_b37	Independent	4.57297	NaN	NaN	1.35024	1.18011	1.52037	-1.42114	-2.54624	-0.296045	-0.0709012	NaN	NaN
ADPSBQ	ENSG00000162493.12	1_13946586_G_A_b37	1_13921934_A_G_b37	Independent	5.46076	NaN	NaN	-2.22293	-3.71798	-0.727889	-0.51137	-0.718905	-0.303836	-2.7343	NaN	NaN
ADPSBQ	ENSG00000235398.4	1_144924363_A_G_b37	1_144865454_C_T_b37	Independent	5.69373	NaN	NaN	0.458969	0.267412	0.650525	0.829216	0.474512	1.18392	1.28819	NaN	NaN
ADPSBQ	ENSG00000231360.2	1_145094584_T_C_b37	1_144924363_A_G_b37	Independent	5.12577	NaN	NaN	2.2704	2.05177	2.48904	0.663498	0.404886	0.922109	2.9339	NaN	NaN
ADPSBQ	ENSG00000131795.8	1_145507646_G_A_b37	1_145587540_C_G_b37	Independent	5.6058	NaN	NaN	-0.335893	-0.462611	-0.209176	-0.160372	-0.257	-0.0637442	-0.496265	NaN	NaN
ADPSBQ	ENSG00000117262.14	1_145581623_A_ATTTCTT_b37	1_144859929_C_T_b37	Independent	5.66643	NaN	NaN	0.289584	0.157834	0.421335	-0.525786	-0.795757	-0.255815	-0.236202	NaN	NaN
ADPSBQ	ENSG00000261716.1	1_149816036_T_G_b37	1_149815323_G_A_b37	Independent	5.69373	NaN	NaN	-0.527928	-0.732695	-0.32316	-0.451398	-0.630819	-0.271977	-0.979325	NaN	NaN
ADPSBQ	ENSG00000159164.5	1_149867594_G_T_b37	1_149865483_A_G_b37	Independent	5.69373	NaN	NaN	-0.364313	NaN	NaN	-0.364313	NaN	NaN	-0.728627	NaN	NaN
ADPSBQ	ENSG00000118292.4	1_150340059_G_GTAAC_b37	1_151082436_A_T_b37	Independent	-0.695772	-20.9428	5.59471	-0.38567	-0.897384	0.126044	-0.225169	-0.327795	-0.122544	-0.610839	NaN	NaN
ADPSBQ	ENSG00000143452.11	1_150685835_A_G_b37	1_151084979_G_A_b37	Independent	5.12992	NaN	NaN	2.05959	1.83984	2.27933	-2.73263	-7.88289	2.41764	-0.673043	NaN	NaN
ADPSBQ	ENSG00000163131.6	1_150753487_G_A_b37	1_150718602_T_G_b37	Independent	3.9587	NaN	NaN	-0.51082	-0.679595	-0.342045	0.201143	0.104192	0.298095	-0.309676	NaN	NaN
ADPSBQ	ENSG00000203288.3	1_151760131_T_C_b37	1_151417455_G_C_b37	Independent	5.63121	NaN	NaN	0.660473	0.356499	0.964447	0.928731	0.432158	1.4253	1.5892	NaN	NaN
ADPSBQ	ENSG00000237975.2	1_152161735_C_T_b37	1_152165878_C_T_b37	Independent	-3.78414	-27.248	5.27341	-1.73982	-1.92192	-1.55771	0.522415	0.323164	0.721665	-1.2174	NaN	NaN
ADPSBQ	ENSG00000163239.8	1_154510790_C_T_b37	1_153816049_C_T_b37	Independent	4.42958	NaN	NaN	-0.280044	-0.381244	-0.178845	0.398237	0.186794	0.609679	0.118192	NaN	NaN
ADPSBQ	ENSG00000185499.12	1_155178782_A_T_b37	1_155137395_G_T_b37	Independent	5.65948	NaN	NaN	0.415	0.282984	0.547016	-0.499061	-0.709948	-0.288173	-0.0840607	NaN	NaN
ADPSBQ	ENSG00000163468.10	1_156233787_G_A_b37	1_156295453_C_T_b37	Independent	5.55355	NaN	NaN	0.107535	0.057889	0.157181	-0.0820456	-0.129432	-0.0346596	0.0254896	NaN	NaN
ADPSBQ	ENSG00000160783.15	1_156464545_C_G_b37	1_156197380_C_T_b37	Independent	5.36676	NaN	NaN	-0.0820075	-0.123198	-0.0408171	-0.117677	-0.176519	-0.0588348	-0.199684	NaN	NaN
ADPSBQ	ENSG00000163382.7	1_156564922_C_T_b37	1_155595108_G_T_b37	Independent	1.80669	NaN	NaN	0.178169	0.120051	0.236287	-0.251461	-0.376033	-0.12689	-0.0732923	NaN	NaN
ADPSBQ	ENSG00000163554.7	1_158624779_T_C_b37	1_158624528_G_T_b37	Independent	5.69373	NaN	NaN	4.45449	4.15373	4.75525	0.867455	0.534313	1.2006	5.32195	NaN	NaN
ADPSBQ	ENSG00000163564.10	1_158904937_T_C_b37	1_159511929_A_G_b37	Independent	5.54126	NaN	NaN	1.07704	0.454983	1.69909	-1.0683	-1.78284	-0.353752	0.00874019	NaN	NaN
ADPSBQ	ENSG00000227775.3	1_1596500_C_T_b37	1_1684472_C_T_b37	Independent	5.4145	NaN	NaN	0.954311	0.822273	1.08635	-0.410276	-0.55173	-0.268822	0.544036	NaN	NaN
ADPSBQ	ENSG00000188004.5	1_159824205_C_T_b37	1_159809342_G_A_b37	Independent	5.46848	NaN	NaN	0.503993	0.336565	0.671421	-0.362432	-0.522754	-0.202111	0.141561	NaN	NaN
ADPSBQ	ENSG00000158769.13	1_160990878_C_T_b37	1_160057522_C_T_b37	Independent	3.89607	NaN	NaN	-0.188115	-0.254879	-0.121351	0.190991	0.121939	0.260043	0.00287596	NaN	NaN
ADPSBQ	ENSG00000215845.6	1_161008535_C_G_b37	1_161020389_G_A_b37	Independent	3.40952	NaN	NaN	1.98891	1.79633	2.18148	0.391999	0.175586	0.608411	2.38091	NaN	NaN
ADPSBQ	ENSG00000158869.6	1_161067478_A_T_b37	1_161159147_C_T_b37	Independent	4.89688	NaN	NaN	0.193151	0.0815161	0.304786	-0.320475	-0.448661	-0.192289	-0.127324	NaN	NaN
ADPSBQ	ENSG00000158793.9	1_161070250_C_A_b37	1_161145005_C_T_b37	Independent	5.69373	NaN	NaN	-0.189612	-0.269272	-0.109951	0.383576	0.245993	0.52116	0.193965	NaN	NaN
ADPSBQ	ENSG00000225217.1	1_161533055_T_G_b37	1_161594822_TA_T_b37	Independent	1.06582	NaN	NaN	-2.90802	-3.39819	-2.41785	-0.975805	-1.42089	-0.530715	-3.88383	NaN	NaN
ADPSBQ	ENSG00000152332.11	1_161612340_C_T_b37	1_161978294_C_T_b37	Independent	5.47576	NaN	NaN	0.334443	0.150815	0.518071	0.0826043	0.0270686	0.13814	0.417047	NaN	NaN
ADPSBQ	ENSG00000162746.10	1_161702011_C_T_b37	1_161704111_G_A_b37	Independent	5.67675	NaN	NaN	0.464886	0.268043	0.661729	0.841564	0.632925	1.0502	1.30645	NaN	NaN
ADPSBQ	ENSG00000239887.3	1_161726149_A_T_b37	1_162154163_C_T_b37	Independent	5.5733	NaN	NaN	1.03998	0.698936	1.38102	-0.737745	-1.0771	-0.398392	0.302235	NaN	NaN
ADPSBQ	ENSG00000008128.18	1_1619767_C_T_b37	1_1807351_T_A_b37	Independent	5.6204	NaN	NaN	-0.202256	-0.31712	-0.0873925	-2.89518	-5.83516	0.0447869	-3.09744	NaN	NaN
ADPSBQ	ENSG00000184908.13	1_16339313_C_G_b37	1_17290606_TTTTTC_T_b37	Independent	5.245	NaN	NaN	-0.581579	-0.920826	-0.242331	-0.527482	-0.878621	-0.176342	-1.10906	NaN	NaN
ADPSBQ	ENSG00000186510.7	1_16388646_T_C_b37	1_16349336_C_T_b37	Independent	5.30668	NaN	NaN	1.05427	0.66534	1.4432	0.907654	0.308628	1.50668	1.96192	NaN	NaN
ADPSBQ	ENSG00000162761.10	1_165317732_C_T_b37	1_165435721_G_A_b37	Independent	5.68017	NaN	NaN	-0.531109	-0.741696	-0.320522	1.16263	0.635548	1.68972	0.631523	NaN	NaN
ADPSBQ	ENSG00000171806.7	1_169856538_T_C_b37	1_169265488_A_G_b37	Independent	3.07518	NaN	NaN	-1.27932	-1.46936	-1.08928	0.693932	0.432963	0.954901	-0.585387	NaN	NaN
ADPSBQ	ENSG00000271811.1	1_170633896_T_C_b37	1_170563083_A_C_b37	Independent	5.69373	NaN	NaN	0.858678	0.617599	1.09976	1.36495	0.952222	1.77768	2.22363	NaN	NaN
ADPSBQ	ENSG00000215908.5	1_17216135_G_C_b37	1_17299983_A_G_b37	Independent	3.94555	NaN	NaN	-0.37751	-0.531763	-0.223256	0.479178	0.24043	0.717925	0.101668	NaN	NaN
ADPSBQ	ENSG00000094975.9	1_172549294_C_G_b37	1_172492498_T_C_b37	Independent	4.91067	NaN	NaN	-0.200068	-0.263681	-0.136455	0.0977593	0.0471302	0.148389	-0.102308	NaN	NaN
ADPSBQ	ENSG00000186715.6	1_17284497_CT_C_b37	1_17006446_A_T_b37	Independent	0.864472	NaN	NaN	0.72942	0.445694	1.01315	-0.86942	-1.13162	-0.607217	-0.14	NaN	NaN
ADPSBQ	ENSG00000235241.1	1_17289911_C_T_b37	1_16796721_A_C_b37	Independent	3.13019	NaN	NaN	-0.454131	-0.612615	-0.295647	0.437957	0.270794	0.60512	-0.0161738	NaN	NaN
ADPSBQ	ENSG00000235750.5	1_175189570_G_A_b37	1_175156878_GC_G_b37	Independent	5.66685	NaN	NaN	0.436435	0.28456	0.588311	-0.315537	-0.455642	-0.175433	0.120898	NaN	NaN
ADPSBQ	ENSG00000230124.2	1_180238844_C_T_b37	1_180412904_C_T_b37	Independent	5.67332	NaN	NaN	0.373202	0.245754	0.500651	0.396984	0.231075	0.562894	0.770186	NaN	NaN
ADPSBQ	ENSG00000058085.10	1_183155305_G_A_b37	1_183185189_G_A_b37	Independent	2.52243	NaN	NaN	0.716744	0.577077	0.856412	-1.11444	-1.76461	-0.464262	-0.397694	NaN	NaN
ADPSBQ	ENSG00000169885.5	1_1841919_G_A_b37	1_1684472_C_T_b37	Independent	5.66296	NaN	NaN	-1.04876	-1.27758	-0.819949	-0.526158	-0.682497	-0.369819	-1.57492	NaN	NaN
ADPSBQ	ENSG00000229739.1	1_186370598_T_TTCTG_b37	1_186466325_G_T_b37	Independent	1.20781	NaN	NaN	0.914306	0.696986	1.13163	-0.364317	-0.53365	-0.194983	0.549989	NaN	NaN
ADPSBQ	ENSG00000179023.7	1_18807781_C_T_b37	1_18801847_CT_C_b37	Independent	5.03978	NaN	NaN	3.01363	2.68767	3.33959	1.19855	0.77062	1.62649	4.21218	NaN	NaN
ADPSBQ	ENSG00000127463.9	1_19565344_C_G_b37	1_19415304_C_T_b37	Independent	-1.77568	-22.2448	5.51088	-0.222634	-0.263854	-0.181415	-0.103094	-0.143783	-0.0624039	-0.325728	NaN	NaN
ADPSBQ	ENSG00000116785.9	1_195903405_G_A_b37	1_196663854_T_C_b37	Independent	-2.00292	-34.0318	5.64898	1.29724	1.01068	1.5838	1.17838	0.279834	2.07692	2.47562	NaN	NaN
ADPSBQ	ENSG00000053371.8	1_19638090_G_C_b37	1_20254356_C_T_b37	Independent	5.25388	NaN	NaN	0.176534	0.0867012	0.266366	-0.438465	-0.632118	-0.244811	-0.261931	NaN	NaN
ADPSBQ	ENSG00000162585.12	1_1986455_C_T_b37	1_2110848_T_G_b37	Independent	5.66643	NaN	NaN	-0.222171	-0.285235	-0.159107	-0.249741	-0.395458	-0.104025	-0.471913	NaN	NaN
ADPSBQ	ENSG00000260088.1	1_200663674_A_G_b37	1_200644595_A_T_b37	Independent	3.2653	NaN	NaN	-0.864887	-1.06482	-0.664957	-1.26663	-1.52232	-1.01095	-2.13152	NaN	NaN
ADPSBQ	ENSG00000134375.6	1_201119643_A_G_b37	1_201925855_C_T_b37	Independent	5.37545	NaN	NaN	0.111157	0.0646918	0.157623	-0.137052	-0.216971	-0.0571336	-0.0258948	NaN	NaN
ADPSBQ	ENSG00000176393.6	1_201969490_G_A_b37	1_201966295_TG_T_b37	Independent	5.63835	NaN	NaN	-0.160872	-0.222021	-0.099724	0.26686	0.166861	0.366859	0.105988	NaN	NaN
ADPSBQ	ENSG00000243323.1	1_202629724_G_C_b37	1_202146978_G_A_b37	Independent	5.28061	NaN	NaN	-0.672181	-0.955845	-0.388517	0.388291	0.213435	0.563147	-0.28389	NaN	NaN
ADPSBQ	ENSG00000117153.11	1_202864349_A_G_b37	1_202982171_C_T_b37	Independent	3.26286	NaN	NaN	-0.162843	-0.259615	-0.0660711	-0.0941939	-0.147146	-0.0412422	-0.257037	NaN	NaN
ADPSBQ	ENSG00000162545.5	1_20538163_C_T_b37	1_20703026_C_T_b37	Independent	4.56285	NaN	NaN	-0.253457	-0.361761	-0.145152	-0.307481	-0.432685	-0.182276	-0.560938	NaN	NaN
ADPSBQ	ENSG00000117280.8	1_205753097_A_G_b37	1_205707142_T_A_b37	Independent	5.69319	NaN	NaN	0.37661	0.303437	0.449783	-0.337962	-0.454107	-0.221817	0.0386476	NaN	NaN
ADPSBQ	ENSG00000143466.9	1_206643795_C_T_b37	1_206645543_A_G_b37	Independent	5.59842	NaN	NaN	-0.369403	-0.510886	-0.22792	-0.683488	-1.00627	-0.360709	-1.05289	NaN	NaN
ADPSBQ	ENSG00000090432.5	1_20834610_C_A_b37	1_20826685_T_A_b37	Independent	5.64545	NaN	NaN	0.39996	0.322961	0.476958	-0.117876	-0.172983	-0.0627692	0.282084	NaN	NaN
ADPSBQ	ENSG00000203705.6	1_212955231_A_C_b37	1_212965284_C_G_b37	Independent	4.89792	NaN	NaN	-0.370019	-0.436131	-0.303908	-0.106782	-0.157449	-0.0561144	-0.476801	NaN	NaN
ADPSBQ	ENSG00000227001.2	1_21780651_A_G_b37	1_21805730_A_G_b37	Independent	5.59842	NaN	NaN	1.97429	1.68463	2.26394	-0.579493	-0.786432	-0.372555	1.39479	NaN	NaN
ADPSBQ	ENSG00000142794.14	1_21814260_A_C_b37	1_21766605_TGCAGGC_T_b37	Independent	0.41192	NaN	NaN	-1.34571	-1.45528	-1.23615	-0.462783	-0.561478	-0.364087	-1.8085	NaN	NaN
ADPSBQ	ENSG00000272823.1	1_221040171_T_G_b37	1_221052802_CT_C_b37	Independent	5.55291	NaN	NaN	1.23204	1.05382	1.41026	-0.661235	-0.93726	-0.38521	0.570808	NaN	NaN
ADPSBQ	ENSG00000187554.7	1_224095664_CAAAT_C_b37	1_223282490_TGC_T_b37	Independent	4.95384	NaN	NaN	0.436612	0.227284	0.645939	-0.287188	-0.773221	0.198846	0.149424	NaN	NaN
ADPSBQ	ENSG00000203697.7	1_224354066_A_G_b37	1_223888558_GC_G_b37	Independent	1.53469	NaN	NaN	0.753177	0.416431	1.08992	-0.829322	-1.22615	-0.432492	-0.076145	NaN	NaN
ADPSBQ	ENSG00000243709.1	1_226108200_C_T_b37	1_226004162_C_A_b37	Independent	5.29032	NaN	NaN	-1.0729	-1.46764	-0.678156	0.39696	0.175986	0.617935	-0.675939	NaN	NaN
ADPSBQ	ENSG00000234112.2	1_226197196_G_A_b37	1_225980267_T_A_b37	Independent	3.81988	NaN	NaN	-0.342915	-0.538995	-0.146835	-0.442731	-0.634177	-0.251284	-0.785646	NaN	NaN
ADPSBQ	ENSG00000182118.5	1_232077211_A_G_b37	1_231114465_C_G_b37	Independent	5.4856	NaN	NaN	0.324639	0.215562	0.433715	-0.392871	-0.579967	-0.205775	-0.0682328	NaN	NaN
ADPSBQ	ENSG00000135778.7	1_232567446_GCA_G_b37	1_233071984_T_G_b37	Independent	5.64649	NaN	NaN	0.364157	0.311381	0.416932	0.333546	0.182356	0.484735	0.697702	NaN	NaN
ADPSBQ	ENSG00000231663.1	1_234508956_A_C_b37	1_234519452_C_CT_b37	Independent	5.41434	NaN	NaN	0.878786	0.712733	1.04484	0.25646	0.131516	0.381405	1.13525	NaN	NaN
ADPSBQ	ENSG00000224939.1	1_234764966_G_A_b37	1_234767912_G_T_b37	Independent	5.15308	NaN	NaN	0.848147	0.595605	1.10069	-0.669976	-0.976809	-0.363143	0.178171	NaN	NaN
ADPSBQ	ENSG00000260855.1	1_246952424_C_A_b37	1_246914317_C_G_b37	Independent	-4.09435	-21.9658	4.25269	0.818778	0.619743	1.01781	-0.495439	-0.70133	-0.289548	0.323339	NaN	NaN
ADPSBQ	ENSG00000001460.13	1_24731659_G_A_b37	1_24785393_C_T_b37	Independent	5.32494	NaN	NaN	-0.288328	-0.386608	-0.190048	-0.496974	-0.604298	-0.389651	-0.785302	NaN	NaN
ADPSBQ	ENSG00000162722.8	1_247803297_C_T_b37	1_247844842_C_T_b37	Independent	5.61406	NaN	NaN	1.13474	0.777465	1.49201	0.642171	0.398412	0.885931	1.77691	NaN	NaN
ADPSBQ	ENSG00000188672.12	1_25408465_T_C_b37	1_25829988_C_T_b37	Independent	4.45181	NaN	NaN	-0.968751	-1.20612	-0.731384	-0.457209	-0.670244	-0.244173	-1.42596	NaN	NaN
ADPSBQ	ENSG00000158006.9	1_25646634_C_A_b37	1_26324108_C_A_b37	Independent	5.57595	NaN	NaN	-0.148571	-0.212529	-0.0846134	-0.412139	-0.707183	-0.117095	-0.56071	NaN	NaN
ADPSBQ	ENSG00000204178.5	1_25739064_G_A_b37	1_25722090_A_G_b37	Independent	4.17005	NaN	NaN	0.212028	0.117253	0.306803	-0.142046	-0.234253	-0.0498389	0.0699821	NaN	NaN
ADPSBQ	ENSG00000184389.8	1_34546694_G_A_b37	1_33881897_G_A_b37	Independent	4.75177	NaN	NaN	0.961905	0.794106	1.1297	-0.37916	-0.546129	-0.212191	0.582745	NaN	NaN
ADPSBQ	ENSG00000130764.5	1_3536051_C_T_b37	1_3701149_CA_C_b37	Independent	3.2737	NaN	NaN	0.140732	0.0710963	0.210368	0.0815787	0.0471513	0.116006	0.222311	NaN	NaN
ADPSBQ	ENSG00000158109.10	1_3563428_C_T_b37	1_3572774_A_G_b37	Independent	5.65599	NaN	NaN	0.284854	0.230792	0.338917	-0.127987	-0.193778	-0.0621967	0.156867	NaN	NaN
ADPSBQ	ENSG00000116198.8	1_3774473_G_T_b37	1_3757300_C_T_b37	Independent	5.67332	NaN	NaN	0.165552	0.115097	0.216006	-0.115949	-0.172103	-0.0597939	0.0496031	NaN	NaN
ADPSBQ	ENSG00000233621.1	1_37918320_C_T_b37	1_37944506_G_A_b37	Independent	5.33899	NaN	NaN	-0.917897	-1.04198	-0.793812	0.254084	0.1501	0.358068	-0.663813	NaN	NaN
ADPSBQ	ENSG00000163879.9	1_38047391_C_A_b37	1_37902135_T_C_b37	Independent	5.63443	NaN	NaN	0.317276	0.218948	0.415604	-0.616215	-0.927592	-0.304838	-0.298939	NaN	NaN
ADPSBQ	ENSG00000204084.8	1_38290103_C_T_b37	1_38361215_C_T_b37	Independent	5.65948	NaN	NaN	0.349473	0.291245	0.407702	-0.157693	-0.219914	-0.0954712	0.191781	NaN	NaN
ADPSBQ	ENSG00000168653.6	1_39484928_GC_G_b37	1_39487144_G_T_b37	Independent	5.43313	NaN	NaN	-0.395708	-0.448883	-0.342534	0.162513	0.111261	0.213765	-0.233195	NaN	NaN
ADPSBQ	ENSG00000198754.5	1_39970457_G_A_b37	1_40088592_TCTC_T_b37	Independent	5.62243	NaN	NaN	0.803114	0.42808	1.17815	1.18806	0.473415	1.90271	1.99118	NaN	NaN
ADPSBQ	ENSG00000182109.3	1_40089425_G_T_b37	1_40020020_C_A_b37	Independent	5.55683	NaN	NaN	-2.91569	-4.89055	-0.940826	0.620756	0.391085	0.850427	-2.29493	NaN	NaN
ADPSBQ	ENSG00000043514.11	1_40330141_C_T_b37	1_40349333_G_A_b37	Independent	5.69373	NaN	NaN	-0.41783	-0.532933	-0.302727	0.265099	0.174789	0.355409	-0.152731	NaN	NaN
ADPSBQ	ENSG00000235358.1	1_41745035_C_T_b37	1_41454425_G_A_b37	Independent	5.03147	NaN	NaN	-0.432156	-0.667403	-0.196908	0.671661	0.382824	0.960498	0.239506	NaN	NaN
ADPSBQ	ENSG00000198912.6	1_4289045_A_G_b37	1_3808171_T_C_b37	Independent	5.51492	NaN	NaN	0.497744	0.436577	0.55891	0.110612	0.0503735	0.170851	0.608356	NaN	NaN
ADPSBQ	ENSG00000066185.8	1_42973414_G_GTTA_b37	1_42904901_A_AAAC_b37	Independent	5.53828	NaN	NaN	-0.974083	-1.35955	-0.588613	0.268863	0.0559826	0.481744	-0.705219	NaN	NaN
ADPSBQ	ENSG00000243710.3	1_43695708_G_A_b37	1_43697968_G_A_b37	Independent	5.69373	NaN	NaN	-2.25067	-2.43987	-2.06148	-0.617992	-0.840255	-0.395729	-2.86867	NaN	NaN
ADPSBQ	ENSG00000132768.9	1_44320114_A_G_b37	1_43880095_T_A_b37	Independent	5.67332	NaN	NaN	0.330295	0.173349	0.48724	-0.751254	-1.0764	-0.426113	-0.42096	NaN	NaN
ADPSBQ	ENSG00000117410.9	1_44407322_C_A_b37	1_44443874_T_TGAC_b37	Independent	5.64191	NaN	NaN	0.498651	0.380918	0.616383	-0.213377	-0.312086	-0.114667	0.285274	NaN	NaN
ADPSBQ	ENSG00000268949.1	1_45262254_G_A_b37	1_44546452_T_C_b37	Independent	5.53067	NaN	NaN	-0.552353	-0.850646	-0.254061	0.63587	0.371905	0.899836	0.0835171	NaN	NaN
ADPSBQ	ENSG00000086015.16	1_47080983_G_A_b37	1_46349726_AAGAAGG_A_b37	Independent	-0.324266	-15.9726	5.58105	0.194868	0.134941	0.254795	-0.138868	-0.201144	-0.0765919	0.056	NaN	NaN
ADPSBQ	ENSG00000162365.7	1_47502057_TAC_T_b37	1_47343436_T_C_b37	Independent	3.5615	NaN	NaN	-0.695433	-1.04117	-0.349696	-0.620946	-0.972914	-0.268979	-1.31638	NaN	NaN
ADPSBQ	ENSG00000186160.4	1_47512761_C_T_b37	1_47266590_G_A_b37	Independent	2.96476	NaN	NaN	-0.566358	-0.797638	-0.335079	-1.1959	-1.82363	-0.568173	-1.76226	NaN	NaN
ADPSBQ	ENSG00000078618.15	1_52264064_A_G_b37	1_52167025_G_A_b37	Independent	5.69373	NaN	NaN	0.102503	0.0653542	0.139652	0.217231	0.101348	0.333114	0.319735	NaN	NaN
ADPSBQ	ENSG00000154222.10	1_52780335_G_C_b37	1_52572289_T_TG_b37	Independent	4.01611	NaN	NaN	-0.356875	-0.445409	-0.268341	0.167367	0.108974	0.22576	-0.189508	NaN	NaN
ADPSBQ	ENSG00000272100.1	1_52802333_ATT_A_b37	1_51942911_A_G_b37	Independent	5.53339	NaN	NaN	-0.571771	-0.848767	-0.294776	-0.618722	-1.51696	0.279519	-1.19049	NaN	NaN
ADPSBQ	ENSG00000116157.5	1_53103888_G_T_b37	1_53064034_G_A_b37	Independent	4.72595	NaN	NaN	-0.668184	-0.749975	-0.586394	0.220854	0.127014	0.314694	-0.44733	NaN	NaN
ADPSBQ	ENSG00000162383.7	1_53557976_C_T_b37	1_53557484_T_C_b37	Independent	5.69373	NaN	NaN	0.552322	0.375406	0.729237	0.767513	0.491679	1.04335	1.31983	NaN	NaN
ADPSBQ	ENSG00000230953.2	1_53587664_C_T_b37	1_53335826_G_T_b37	Independent	5.67332	NaN	NaN	1.10046	0.627629	1.57329	0.608027	0.30575	0.910304	1.70849	NaN	NaN
ADPSBQ	ENSG00000162384.9	1_53675532_T_C_b37	1_53686383_C_G_b37	Independent	5.69373	NaN	NaN	-0.124456	-0.170373	-0.0785381	-0.0989838	-0.146088	-0.0518798	-0.223439	NaN	NaN
ADPSBQ	ENSG00000212670.1	1_54562444_A_G_b37	1_54574610_G_A_b37	Independent	5.68358	NaN	NaN	0.933025	0.740351	1.1257	-0.262922	-0.374237	-0.151608	0.670102	NaN	NaN
ADPSBQ	ENSG00000162604.8	1_62640152_A_C_b37	1_62189541_T_C_b37	Independent	5.51674	NaN	NaN	0.197354	0.148645	0.246064	-0.362625	-0.517828	-0.207422	-0.16527	NaN	NaN
ADPSBQ	ENSG00000162437.10	1_65904748_C_T_b37	1_65378914_C_T_b37	Independent	5.65249	NaN	NaN	0.672072	0.441908	0.902236	-0.606927	-0.931256	-0.282599	0.0651448	NaN	NaN
ADPSBQ	ENSG00000198160.10	1_67427769_C_T_b37	1_67446770_T_TTAGA_b37	Independent	3.53121	NaN	NaN	0.0611449	0.0232181	0.0990718	-0.29362	-0.507937	-0.0793021	-0.232475	NaN	NaN
ADPSBQ	ENSG00000197568.9	1_70842317_C_T_b37	1_70820802_G_A_b37	Independent	5.66643	NaN	NaN	1.31941	1.01157	1.62724	-0.499091	-0.640466	-0.357715	0.820315	NaN	NaN
ADPSBQ	ENSG00000224956.5	1_714019_A_G_b37	1_759177_G_A_b37	Independent	5.52508	NaN	NaN	-6.64385	-34.1382	20.8505	6.26238	-21.2626	33.7874	-0.381478	NaN	NaN
ADPSBQ	ENSG00000116783.10	1_74683304_A_G_b37	1_74709711_C_G_b37	Independent	5.66643	NaN	NaN	1.31041	1.00675	1.61408	0.366344	0.257847	0.474842	1.67676	NaN	NaN
ADPSBQ	ENSG00000272864.1	1_75171109_A_T_b37	1_75193271_T_TCAC_b37	Independent	2.27374	NaN	NaN	-1.3932	-1.6394	-1.147	-0.823457	-1.04439	-0.602527	-2.21666	NaN	NaN
ADPSBQ	ENSG00000237094.7	1_787151_G_A_b37	1_792263_A_G_b37	Independent	1.33037	NaN	NaN	0.594495	0.419681	0.769308	0.469804	0.144349	0.795258	1.0643	NaN	NaN
ADPSBQ	ENSG00000116288.8	1_7943026_T_C_b37	1_7799764_A_G_b37	Independent	5.64545	NaN	NaN	-0.0724485	-0.110089	-0.0348083	-0.212722	-0.335901	-0.0895429	-0.28517	NaN	NaN
ADPSBQ	ENSG00000117151.8	1_85039318_C_T_b37	1_84943247_C_T_b37	Independent	5.57869	NaN	NaN	0.373574	0.254683	0.492465	-0.211158	-0.30367	-0.118646	0.162416	NaN	NaN
ADPSBQ	ENSG00000153898.8	1_85441785_C_T_b37	1_85405894_A_G_b37	Independent	5.68147	NaN	NaN	-0.806121	-1.01521	-0.597027	-0.638963	-0.928794	-0.349132	-1.44508	NaN	NaN
ADPSBQ	ENSG00000122417.11	1_86837782_A_G_b37	1_86817397_C_T_b37	Independent	5.66296	NaN	NaN	-0.425144	-0.488156	-0.362132	0.204743	0.141102	0.268383	-0.220401	NaN	NaN
ADPSBQ	ENSG00000188976.6	1_886006_T_C_b37	1_809876_A_G_b37	Independent	5.39757	NaN	NaN	-0.244204	-0.316239	-0.17217	-0.124856	-0.192514	-0.0571978	-0.36906	NaN	NaN
ADPSBQ	ENSG00000137944.12	1_89388944_A_C_b37	1_89463233_AG_A_b37	Independent	4.97758	NaN	NaN	-0.273033	-0.325789	-0.220276	-0.158403	-0.21873	-0.0980752	-0.431435	NaN	NaN
ADPSBQ	ENSG00000049239.8	1_9331629_T_G_b37	1_9307230_T_A_b37	Independent	4.7567	NaN	NaN	-0.298962	-0.368311	-0.229612	-0.232634	-0.294355	-0.170913	-0.531596	NaN	NaN
ADPSBQ	ENSG00000223745.3	1_93803000_C_T_b37	1_93646620_C_T_b37	Independent	5.69373	NaN	NaN	1.25217	1.14409	1.36024	-0.719361	-0.899719	-0.539002	0.532806	NaN	NaN
ADPSBQ	ENSG00000230439.2	1_94371138_A_G_b37	1_94207992_G_A_b37	Independent	5.55085	NaN	NaN	1.189	1.02593	1.35206	-0.564864	-0.803089	-0.326639	0.624134	NaN	NaN
ADPSBQ	ENSG00000119943.6	10_100142203_A_G_b37	10_100146313_A_T_b37	Independent	5.60212	NaN	NaN	0.52739	0.4442	0.610579	-0.777932	-1.07387	-0.481993	-0.250543	NaN	NaN
ADPSBQ	ENSG00000014919.8	10_101349496_T_TC_b37	10_101358685_T_A_b37	Independent	5.60927	NaN	NaN	-0.100114	-0.145244	-0.054984	-0.133366	-0.193927	-0.0728045	-0.23348	NaN	NaN
ADPSBQ	ENSG00000196072.7	10_101946158_TC_T_b37	10_101890298_C_G_b37	Independent	5.68393	NaN	NaN	-0.783808	-0.916126	-0.651491	0.234622	0.122293	0.346951	-0.549186	NaN	NaN
ADPSBQ	ENSG00000166275.11	10_104611764_A_C_b37	10_104816469_T_C_b37	Independent	5.68698	NaN	NaN	-0.420191	-0.480685	-0.359697	-0.168964	-0.248706	-0.0892216	-0.589155	NaN	NaN
ADPSBQ	ENSG00000148834.8	10_106009593_TTC_T_b37	10_105999942_G_A_b37	Independent	-1.42743	-5.36381	5.44674	-0.669096	-0.942801	-0.395392	0.172739	0.022607	0.322872	-0.496357	NaN	NaN
ADPSBQ	ENSG00000165806.15	10_115487493_C_G_b37	10_115439394_C_T_b37	Independent	1.57743	NaN	NaN	0.567909	0.498667	0.63715	-0.343708	-0.415289	-0.272127	0.224201	NaN	NaN
ADPSBQ	ENSG00000198924.3	10_115615024_A_T_b37	10_115757949_G_C_b37	Independent	5.60947	NaN	NaN	0.412495	0.290208	0.534781	-0.625014	-1.16895	-0.0810782	-0.212519	NaN	NaN
ADPSBQ	ENSG00000165832.4	10_116725461_G_A_b37	10_116490065_A_G_b37	Independent	5.63377	NaN	NaN	0.351195	0.21235	0.490041	-0.191037	-0.301636	-0.0804391	0.160158	NaN	NaN
ADPSBQ	ENSG00000165650.7	10_119103471_A_C_b37	10_119134892_C_G_b37	Independent	5.56134	NaN	NaN	0.228344	0.173488	0.2832	-0.142707	-0.217768	-0.0676466	0.0856369	NaN	NaN
ADPSBQ	ENSG00000138152.7	10_124015709_C_T_b37	10_124020396_T_C_b37	Independent	-2.56445	-16.7015	5.05574	1.93095	1.67565	2.18625	0.895861	0.681338	1.11038	2.82681	NaN	NaN
ADPSBQ	ENSG00000107902.9	10_126168010_G_T_b37	10_126185451_T_C_b37	Independent	3.61661	NaN	NaN	-0.248958	-0.337745	-0.16017	-0.218617	-0.307046	-0.130188	-0.467575	NaN	NaN
ADPSBQ	ENSG00000203791.9	10_126480591_G_C_b37	10_126278704_A_G_b37	Independent	4.42278	NaN	NaN	-0.211517	-0.255699	-0.167335	0.0970695	0.0477793	0.14636	-0.114448	NaN	NaN
ADPSBQ	ENSG00000188690.8	10_127504389_G_A_b37	10_127475792_T_C_b37	Independent	5.68698	NaN	NaN	-0.622953	-0.794665	-0.451241	0.353906	0.185379	0.522432	-0.269047	NaN	NaN
ADPSBQ	ENSG00000186766.7	10_129583408_AT_A_b37	10_129625595_A_G_b37	Independent	5.62762	NaN	NaN	0.931265	0.62088	1.24165	-0.648276	-0.89482	-0.401732	0.28299	NaN	NaN
ADPSBQ	ENSG00000165752.12	10_134002827_TTCTC_T_b37	10_134145314_A_G_b37	Independent	5.29327	NaN	NaN	0.268014	0.197286	0.338743	-0.300533	-0.449708	-0.151357	-0.0325183	NaN	NaN
ADPSBQ	ENSG00000148814.13	10_134164622_C_T_b37	10_134157875_G_A_b37	Independent	5.69373	NaN	NaN	0.348971	0.256341	0.441601	-0.207005	-0.291563	-0.122447	0.141966	NaN	NaN
ADPSBQ	ENSG00000166917.7	10_134612835_T_G_b37	10_135017291_A_C_b37	Independent	5.0368	NaN	NaN	0.466093	0.054251	0.877935	-0.434191	-0.750053	-0.11833	0.0319014	NaN	NaN
ADPSBQ	ENSG00000151650.7	10_135064636_T_C_b37	10_135182280_C_T_b37	Independent	4.43696	NaN	NaN	0.598216	0.32435	0.872081	0.698798	0.399149	0.998446	1.29701	NaN	NaN
ADPSBQ	ENSG00000214279.8	10_135288814_G_T_b37	10_135232654_C_T_b37	Independent	4.99644	NaN	NaN	-0.571239	-0.73947	-0.403008	-0.325423	-0.481951	-0.168895	-0.896662	NaN	NaN
ADPSBQ	ENSG00000148824.14	10_135370005_T_C_b37	10_135213854_C_T_b37	Independent	3.60399	NaN	NaN	0.429859	0.367573	0.492146	0.209232	0.108966	0.309498	0.639092	NaN	NaN
ADPSBQ	ENSG00000165983.10	10_16500224_C_CT_b37	10_16555528_A_T_b37	Independent	5.16602	NaN	NaN	-0.271692	-0.348466	-0.194917	-0.369204	-0.550162	-0.188246	-0.640896	NaN	NaN
ADPSBQ	ENSG00000165985.8	10_16556204_C_CAT_b37	10_16555862_T_A_b37	Independent	5.67332	NaN	NaN	2.89489	2.7111	3.07868	-0.459906	-0.615664	-0.304148	2.43499	NaN	NaN
ADPSBQ	ENSG00000148484.13	10_16853900_A_G_b37	10_16866840_C_T_b37	Independent	5.56165	NaN	NaN	0.360287	0.279035	0.441539	0.11382	0.0490171	0.178622	0.474107	NaN	NaN
ADPSBQ	ENSG00000240291.1	10_18892407_C_T_b37	10_18819869_C_G_b37	Independent	5.15377	NaN	NaN	0.733198	0.613321	0.853075	0.220057	0.104837	0.335278	0.953255	NaN	NaN
ADPSBQ	ENSG00000120539.10	10_27480165_C_T_b37	10_27513062_C_T_b37	Independent	5.67332	NaN	NaN	0.450604	0.390153	0.511055	0.729139	0.585389	0.87289	1.17974	NaN	NaN
ADPSBQ	ENSG00000150054.14	10_28592380_G_A_b37	10_28607596_A_G_b37	Independent	5.37487	NaN	NaN	-0.661566	-0.842192	-0.48094	-0.702152	-1.00171	-0.402592	-1.36372	NaN	NaN
ADPSBQ	ENSG00000150076.18	10_33146987_CT_C_b37	10_32762296_T_C_b37	Independent	5.50126	NaN	NaN	-0.964774	-1.34773	-0.581814	0.577354	0.299739	0.854968	-0.387421	NaN	NaN
ADPSBQ	ENSG00000099251.10	10_38902407_G_A_b37	10_38970100_G_A_b37	Independent	5.40268	NaN	NaN	-0.942874	-1.53174	-0.35401	0.367416	0.222979	0.511853	-0.575458	NaN	NaN
ADPSBQ	ENSG00000175395.11	10_38932672_G_A_b37	10_38059907_T_C_b37	Independent	5.40894	NaN	NaN	0.0981638	0.0533772	0.14295	0.271462	0.146677	0.396247	0.369626	NaN	NaN
ADPSBQ	ENSG00000215146.4	10_42931017_T_C_b37	10_42843933_A_G_b37	Independent	4.56722	NaN	NaN	1.14056	0.877205	1.40391	0.342327	0.0846621	0.599991	1.48288	NaN	NaN
ADPSBQ	ENSG00000233117.2	10_4299104_C_G_b37	10_4245585_C_T_b37	Independent	5.22674	NaN	NaN	0.734231	0.515263	0.953198	-0.607685	-0.768216	-0.447155	0.126545	NaN	NaN
ADPSBQ	ENSG00000165731.13	10_43603173_T_C_b37	10_43570925_A_G_b37	Independent	5.66988	NaN	NaN	2.13273	1.51374	2.75171	-1.44957	-2.01422	-0.884923	0.683154	NaN	NaN
ADPSBQ	ENSG00000165511.4	10_44733382_A_G_b37	10_45499009_A_G_b37	Independent	5.66643	NaN	NaN	0.743771	0.523582	0.96396	0.656804	0.247801	1.06581	1.40057	NaN	NaN
ADPSBQ	ENSG00000224812.2	10_45451364_G_A_b37	10_44956550_G_A_b37	Independent	5.20946	NaN	NaN	-1.27084	-1.65398	-0.887698	-0.325344	-0.47958	-0.171108	-1.59618	NaN	NaN
ADPSBQ	ENSG00000172661.13	10_46249665_TC_T_b37	10_46169848_A_C_b37	Independent	5.62402	NaN	NaN	-0.434123	-0.591966	-0.276279	0.214672	0.138493	0.290851	-0.219451	NaN	NaN
ADPSBQ	ENSG00000204164.6	10_48722794_T_C_b37	10_48573416_C_T_b37	Independent	5.65948	NaN	NaN	-1.98816	-2.6901	-1.28621	-1.88469	-3.79183	0.0224526	-3.87285	NaN	NaN
ADPSBQ	ENSG00000179296.9	10_49327819_TTCAA_T_b37	10_48447437_G_T_b37	Independent	5.37528	NaN	NaN	2.90901	2.17908	3.63895	1.26328	0.842736	1.68383	4.17229	NaN	NaN
ADPSBQ	ENSG00000224251.2	10_5041398_T_C_b37	10_5038464_A_G_b37	Independent	4.38367	NaN	NaN	-0.730757	-1.17305	-0.288468	0.630916	0.343822	0.918009	-0.0998411	NaN	NaN
ADPSBQ	ENSG00000196139.7	10_5062752_C_A_b37	10_5076367_C_T_b37	Independent	5.66988	NaN	NaN	0.704477	0.552419	0.856534	-0.465083	-0.647019	-0.283146	0.239394	NaN	NaN
ADPSBQ	ENSG00000225830.6	10_50675924_T_G_b37	10_50577305_G_A_b37	Independent	5.63174	NaN	NaN	0.181308	0.121852	0.240764	0.174083	0.0897653	0.258401	0.355391	NaN	NaN
ADPSBQ	ENSG00000226200.2	10_52407609_C_T_b37	10_52335646_G_C_b37	Independent	2.56144	NaN	NaN	-0.367828	-0.479306	-0.256349	0.197479	0.118661	0.276297	-0.170349	NaN	NaN
ADPSBQ	ENSG00000204147.5	10_52637925_A_G_b37	10_52516665_C_T_b37	Independent	3.42478	NaN	NaN	-0.339717	-0.470149	-0.209286	-0.335172	-0.488949	-0.181395	-0.674889	NaN	NaN
ADPSBQ	ENSG00000122952.12	10_58059647_G_A_b37	10_58273022_C_T_b37	Independent	5.66643	NaN	NaN	-2.20512	-3.33973	-1.0705	-1.32164	-1.72828	-0.915011	-3.52676	NaN	NaN
ADPSBQ	ENSG00000183346.6	10_63423370_ATCT_A_b37	10_63413315_G_A_b37	Independent	2.22275	NaN	NaN	1.68518	1.46899	1.90138	-0.569249	-0.750995	-0.387503	1.11593	NaN	NaN
ADPSBQ	ENSG00000232075.1	10_65393613_A_G_b37	10_65390634_T_C_b37	Independent	5.69373	NaN	NaN	-1.05992	-1.29494	-0.824894	-0.479723	-0.717144	-0.242302	-1.53964	NaN	NaN
ADPSBQ	ENSG00000138346.10	10_70223133_G_A_b37	10_70240378_T_C_b37	Independent	5.65599	NaN	NaN	-0.758879	-0.986271	-0.531487	-1.08513	-1.72332	-0.446936	-1.84401	NaN	NaN
ADPSBQ	ENSG00000156521.9	10_71696832_C_T_b37	10_71892213_A_G_b37	Independent	4.25971	NaN	NaN	-0.17377	-0.24809	-0.0994503	0.173579	0.0950731	0.252085	-0.000191168	NaN	NaN
ADPSBQ	ENSG00000166220.8	10_72539703_G_A_b37	10_72538798_C_A_b37	Independent	5.64191	NaN	NaN	-1.08842	-1.45061	-0.726221	-1.05811	-1.39981	-0.716421	-2.14653	NaN	NaN
ADPSBQ	ENSG00000148719.10	10_73483773_G_A_b37	10_74113333_T_C_b37	Independent	3.21712	NaN	NaN	-0.0895033	-0.123252	-0.0557551	-0.105264	-0.168415	-0.0421131	-0.194767	NaN	NaN
ADPSBQ	ENSG00000138303.13	10_73904028_T_C_b37	10_73849472_C_T_b37	Independent	4.29434	NaN	NaN	-0.141474	-0.194034	-0.088915	-0.509902	-0.724787	-0.295018	-0.651377	NaN	NaN
ADPSBQ	ENSG00000196968.6	10_75504749_GACCT_G_b37	10_75496130_G_A_b37	Independent	5.66988	NaN	NaN	0.407287	0.290176	0.524397	-0.243875	-0.369083	-0.118666	0.163412	NaN	NaN
ADPSBQ	ENSG00000156113.16	10_79336052_G_C_b37	10_79720746_C_T_b37	Independent	-1.295	-13.9238	5.30254	0.618991	0.448613	0.789369	-0.689176	-0.995835	-0.382517	-0.070185	NaN	NaN
ADPSBQ	ENSG00000151208.12	10_79579251_G_A_b37	10_79643121_A_G_b37	Independent	5.69373	NaN	NaN	0.662429	0.595233	0.729626	-0.162797	-0.232917	-0.0926761	0.499633	NaN	NaN
ADPSBQ	ENSG00000228570.3	10_81592152_T_C_b37	10_81428886_G_A_b37	Independent	4.98037	NaN	NaN	-0.905813	-1.29228	-0.519347	0.888527	0.0749839	1.70207	-0.0172862	NaN	NaN
ADPSBQ	ENSG00000230091.2	10_81816733_A_C_b37	10_81838656_A_C_b37	Independent	5.63835	NaN	NaN	0.947994	0.763526	1.13246	0.703667	0.566442	0.840891	1.65166	NaN	NaN
ADPSBQ	ENSG00000189129.9	10_81894510_G_A_b37	10_81916355_T_C_b37	Independent	4.08225	NaN	NaN	-0.412918	-0.507314	-0.318522	-0.554505	-0.733797	-0.375212	-0.967423	NaN	NaN
ADPSBQ	ENSG00000226659.1	10_82295398_G_A_b37	10_82521074_T_C_b37	Independent	5.62882	NaN	NaN	-1.35713	-1.62466	-1.08959	-0.427887	-0.640073	-0.2157	-1.78501	NaN	NaN
ADPSBQ	ENSG00000122375.7	10_88402302_C_T_b37	10_88384957_A_G_b37	Independent	-1.8218	-20.1091	4.98899	-1.2998	-1.62386	-0.975747	-0.982603	-1.3986	-0.566601	-2.28241	NaN	NaN
ADPSBQ	ENSG00000122367.15	10_88428718_C_T_b37	10_88406970_T_C_b37	Independent	4.98078	NaN	NaN	-1.40758	-1.72595	-1.08921	-0.384478	-0.553413	-0.215543	-1.79206	NaN	NaN
ADPSBQ	ENSG00000026103.15	10_90756065_C_T_b37	10_90759924_G_A_b37	Independent	5.60946	NaN	NaN	0.331067	0.211508	0.450625	-0.279779	-0.403103	-0.156455	0.0512875	NaN	NaN
ADPSBQ	ENSG00000138135.5	10_90984032_G_A_b37	10_90851108_G_A_b37	Independent	4.17695	NaN	NaN	1.07961	0.691988	1.46722	0.819754	0.48197	1.15754	1.89936	NaN	NaN
ADPSBQ	ENSG00000165338.12	10_92664939_T_A_b37	10_92441286_T_A_b37	Independent	3.54462	NaN	NaN	-0.33455	-0.603966	-0.0651353	0.126775	0.0566746	0.196876	-0.207775	NaN	NaN
ADPSBQ	ENSG00000107854.5	10_93643485_G_C_b37	10_93638620_T_C_b37	Independent	4.2436	NaN	NaN	-0.195726	-0.234566	-0.156887	-0.100768	-0.141346	-0.0601902	-0.296494	NaN	NaN
ADPSBQ	ENSG00000138119.12	10_95083039_C_T_b37	10_95216890_A_T_b37	Independent	4.73561	NaN	NaN	0.509314	0.410263	0.608365	-0.554404	-0.739272	-0.369536	-0.0450898	NaN	NaN
ADPSBQ	ENSG00000148690.10	10_95448813_TG_T_b37	10_95467509_T_C_b37	Independent	5.29754	NaN	NaN	-0.278787	-0.33937	-0.218203	-0.226452	-0.337021	-0.115882	-0.505238	NaN	NaN
ADPSBQ	ENSG00000138193.10	10_95759399_G_C_b37	10_96667241_G_T_b37	Independent	3.45079	NaN	NaN	-0.328248	-0.443176	-0.21332	-1.22829	-2.10639	-0.350193	-1.55654	NaN	NaN
ADPSBQ	ENSG00000173124.10	10_97295395_T_C_b37	10_96744731_TC_T_b37	Independent	5.18746	NaN	NaN	3.1163	2.85793	3.37467	0.647195	0.357959	0.93643	3.76349	NaN	NaN
ADPSBQ	ENSG00000187122.12	10_98977250_C_T_b37	10_98845153_T_G_b37	Independent	5.57902	NaN	NaN	0.648462	0.46196	0.834963	-0.502308	-0.697121	-0.307495	0.146154	NaN	NaN
ADPSBQ	ENSG00000213390.6	10_99049010_T_G_b37	10_99004171_G_A_b37	Independent	2.3457	NaN	NaN	0.216089	0.147913	0.284265	-0.262983	-0.407694	-0.118273	-0.0468947	NaN	NaN
ADPSBQ	ENSG00000082175.10	11_101237448_C_A_b37	11_100992663_C_T_b37	Independent	5.6709	NaN	NaN	-0.374453	-0.484957	-0.263949	-0.363838	-0.520691	-0.206985	-0.738291	NaN	NaN
ADPSBQ	ENSG00000235505.3	11_104779873_CTTT_C_b37	11_104022831_C_G_b37	Independent	5.24702	NaN	NaN	0.382456	0.200655	0.564256	-0.903554	-1.42293	-0.384177	-0.521098	NaN	NaN
ADPSBQ	ENSG00000247271.2	11_10540372_A_G_b37	11_10924918_G_C_b37	Independent	5.64898	NaN	NaN	-0.341944	-0.482136	-0.201751	0.189504	-0.242884	0.621892	-0.152439	NaN	NaN
ADPSBQ	ENSG00000255353.1	11_106696424_C_T_b37	11_107060798_C_T_b37	Independent	5.09373	NaN	NaN	-0.474356	-0.740519	-0.208192	0.546204	0.317334	0.775074	0.0718482	NaN	NaN
ADPSBQ	ENSG00000152404.11	11_107300936_G_A_b37	11_107194239_A_G_b37	Independent	5.59099	NaN	NaN	-0.214989	-0.281496	-0.148482	0.11375	0.0460386	0.181461	-0.101239	NaN	NaN
ADPSBQ	ENSG00000170209.4	11_113255574_A_T_b37	11_113187949_A_G_b37	Independent	3.94256	NaN	NaN	0.796229	0.602509	0.989949	0.453258	0.265846	0.64067	1.24949	NaN	NaN
ADPSBQ	ENSG00000177963.8	11_1158549_C_T_b37	11_244961_G_C_b37	Independent	5.09597	NaN	NaN	-0.0912836	-0.141	-0.0415672	-0.0847365	-0.194153	0.0246796	-0.17602	NaN	NaN
ADPSBQ	ENSG00000177103.9	11_117729830_G_A_b37	11_117680676_TCA_T_b37	Independent	5.55736	NaN	NaN	1.35252	1.13958	1.56546	0.617655	0.380569	0.854741	1.97017	NaN	NaN
ADPSBQ	ENSG00000118096.3	11_118439182_G_A_b37	11_118417648_T_TC_b37	Independent	5.66643	NaN	NaN	-0.293039	-0.392005	-0.194072	0.486103	0.304014	0.668191	0.193064	NaN	NaN
ADPSBQ	ENSG00000271751.1	11_118945185_G_A_b37	11_119904780_T_TG_b37	Independent	5.42044	NaN	NaN	-0.44483	-0.668547	-0.221113	-0.518546	-0.743131	-0.293961	-0.963376	NaN	NaN
ADPSBQ	ENSG00000256269.2	11_118958127_C_A_b37	11_119713257_A_T_b37	Independent	4.86297	NaN	NaN	0.358191	0.289935	0.426446	0.149714	0.0732851	0.226143	0.507905	NaN	NaN
ADPSBQ	ENSG00000149548.10	11_124824066_C_T_b37	11_124622402_A_C_b37	Not Independent	-17.0881	-43.8703	-0.684514	-0.336432	-0.434333	-0.434333	-0.189232	-0.81269	0.434225	0.863421	0.500245	1.2266
ADPSBQ	ENSG00000154134.10	11_124929282_TG_T_b37	11_124766591_C_G_b37	Independent	5.11548	NaN	NaN	0.309778	0.126647	0.49291	-0.272098	-0.398367	-0.145828	0.0376806	NaN	NaN
ADPSBQ	ENSG00000109832.8	11_125768412_A_C_b37	11_125763746_C_G_b37	Independent	5.65948	NaN	NaN	0.667938	0.413516	0.922359	-1.42756	-1.7644	-1.09072	-0.759619	NaN	NaN
ADPSBQ	ENSG00000170322.10	11_129720049_T_TG_b37	11_129728926_G_A_b37	Independent	5.65599	NaN	NaN	-0.3195	-0.371674	-0.267326	-0.389449	-0.623577	-0.155321	-0.708949	NaN	NaN
ADPSBQ	ENSG00000120451.6	11_130791400_G_A_b37	11_130749351_TAG_T_b37	Independent	3.68621	NaN	NaN	-0.204515	-0.257136	-0.151895	0.134083	0.0807211	0.187445	-0.0704322	NaN	NaN
ADPSBQ	ENSG00000149328.10	11_134184141_C_T_b37	11_134235392_G_A_b37	Independent	4.09153	NaN	NaN	-0.468636	-0.626563	-0.310709	0.365287	0.210789	0.519784	-0.103349	NaN	NaN
ADPSBQ	ENSG00000251226.1	11_134633506_C_T_b37	11_134632224_A_C_b37	Independent	5.38506	NaN	NaN	-0.926841	-1.37586	-0.477821	-1.50776	-1.73692	-1.2786	-2.4346	NaN	NaN
ADPSBQ	ENSG00000006071.7	11_17427336_G_C_b37	11_17499384_G_A_b37	Independent	4.49851	NaN	NaN	1.4344	1.08529	1.78352	0.547221	0.194314	0.900127	1.98162	NaN	NaN
ADPSBQ	ENSG00000166788.5	11_17477908_T_TGA_b37	11_18104328_G_A_b37	Independent	5.64717	NaN	NaN	-0.242421	-0.306676	-0.178166	0.25838	0.124032	0.392728	0.0159592	NaN	NaN
ADPSBQ	ENSG00000129158.6	11_18034592_G_C_b37	11_18234755_G_A_b37	Independent	5.6214	NaN	NaN	-0.236961	-0.292644	-0.181277	0.115102	0.0589086	0.171296	-0.121858	NaN	NaN
ADPSBQ	ENSG00000110628.9	11_2923826_A_G_b37	11_2924937_C_T_b37	Independent	4.96584	NaN	NaN	-0.685229	-0.787323	-0.583135	-0.308466	-0.420552	-0.196379	-0.993695	NaN	NaN
ADPSBQ	ENSG00000206013.2	11_293001_A_AG_b37	11_295527_T_C_b37	Independent	5.57483	NaN	NaN	-1.38935	-1.62446	-1.15425	0.342603	0.0977004	0.587506	-1.04675	NaN	NaN
ADPSBQ	ENSG00000142102.11	11_295670_G_A_b37	11_295808_A_G_b37	Independent	5.41279	NaN	NaN	0.75778	0.617346	0.898213	0.391769	0.302112	0.481426	1.14955	NaN	NaN
ADPSBQ	ENSG00000251661.3	11_324163_C_T_b37	11_330061_A_G_b37	Independent	5.28859	NaN	NaN	0.908059	0.742406	1.07371	-0.499306	-0.676905	-0.321707	0.408753	NaN	NaN
ADPSBQ	ENSG00000110427.10	11_33399691_G_A_b37	11_32573619_G_A_b37	Independent	4.84882	NaN	NaN	-0.961964	-1.28602	-0.637913	-2.63403	-4.2009	-1.06717	-3.596	NaN	NaN
ADPSBQ	ENSG00000223756.2	11_3414327_C_T_b37	11_3402967_AC_A_b37	Independent	2.5978	NaN	NaN	1.54761	1.09481	2.0004	-1.14592	-1.51009	-0.781757	0.401681	NaN	NaN
ADPSBQ	ENSG00000149089.8	11_34945827_C_T_b37	11_34918540_CACA_C_b37	Independent	5.67332	NaN	NaN	-0.689661	-0.783716	-0.595606	0.468122	0.407478	0.528766	-0.221539	NaN	NaN
ADPSBQ	ENSG00000121691.4	11_35161285_A_G_b37	11_34490537_G_A_b37	Independent	4.34872	NaN	NaN	-0.30762	-0.390392	-0.224849	-0.335399	-0.485065	-0.185734	-0.64302	NaN	NaN
ADPSBQ	ENSG00000149084.7	11_43876813_A_C_b37	11_43878459_G_A_b37	Independent	5.67675	NaN	NaN	-1.00633	-1.09308	-0.919568	-0.339923	-0.489304	-0.190541	-1.34625	NaN	NaN
ADPSBQ	ENSG00000151348.9	11_44106142_G_A_b37	11_44108888_T_C_b37	Independent	5.56068	NaN	NaN	-0.157628	-0.197447	-0.117809	-0.234239	-0.318471	-0.150007	-0.391867	NaN	NaN
ADPSBQ	ENSG00000254427.1	11_45359269_C_G_b37	11_45377933_A_AT_b37	Independent	5.14906	NaN	NaN	1.25951	1.03957	1.47946	0.487787	0.253697	0.721877	1.7473	NaN	NaN
ADPSBQ	ENSG00000186652.5	11_56429956_T_G_b37	11_57160186_T_C_b37	Independent	4.26134	NaN	NaN	-0.824376	-1.04075	-0.608003	-0.452305	-0.638832	-0.265777	-1.27668	NaN	NaN
ADPSBQ	ENSG00000134809.4	11_57082896_T_C_b37	11_57326927_C_T_b37	Independent	5.20971	NaN	NaN	-0.41042	-0.474425	-0.346415	-0.185324	-0.258625	-0.112023	-0.595744	NaN	NaN
ADPSBQ	ENSG00000181074.3	11_5730294_C_T_b37	11_5837108_ATGTG_A_b37	Independent	2.57098	NaN	NaN	1.39633	1.04612	1.74654	-0.600874	-0.872053	-0.329694	0.795459	NaN	NaN
ADPSBQ	ENSG00000156603.10	11_57529130_C_T_b37	11_57733923_T_C_b37	Independent	2.2957	NaN	NaN	0.240875	0.179387	0.302363	-0.162319	-0.219316	-0.105323	0.0785556	NaN	NaN
ADPSBQ	ENSG00000180988.2	11_5816199_T_C_b37	11_5745637_T_G_b37	Independent	5.29352	NaN	NaN	0.764411	0.580525	0.948298	1.11753	0.83511	1.39996	1.88194	NaN	NaN
ADPSBQ	ENSG00000156689.2	11_58686780_C_A_b37	11_57873135_T_C_b37	Independent	5.5105	NaN	NaN	0.713371	0.457683	0.969058	0.552509	0.303793	0.801225	1.26588	NaN	NaN
ADPSBQ	ENSG00000166928.6	11_60135871_A_C_b37	11_60723010_G_A_b37	Independent	4.96485	NaN	NaN	1.57637	1.3991	1.75363	-0.579087	-0.936131	-0.222044	0.997279	NaN	NaN
ADPSBQ	ENSG00000187049.5	11_61134532_T_C_b37	11_61137214_G_A_b37	Independent	5.68358	NaN	NaN	-0.313714	-0.389307	-0.238121	-0.898735	-1.16235	-0.635118	-1.21245	NaN	NaN
ADPSBQ	ENSG00000170955.9	11_6340525_A_T_b37	11_6342582_G_C_b37	Independent	5.51343	NaN	NaN	0.531186	0.365645	0.696726	-0.263318	-0.366029	-0.160607	0.267867	NaN	NaN
ADPSBQ	ENSG00000173113.2	11_64069541_T_C_b37	11_63897295_G_A_b37	Independent	1.68645	NaN	NaN	-0.196132	-0.296778	-0.095486	0.0746494	0.0341374	0.115161	-0.121483	NaN	NaN
ADPSBQ	ENSG00000149782.7	11_64263085_CCA_C_b37	11_63158826_T_G_b37	Independent	5.05562	NaN	NaN	0.516374	0.172342	0.860405	-0.0711979	-0.152035	0.00963874	0.445176	NaN	NaN
ADPSBQ	ENSG00000173442.7	11_64763757_C_T_b37	11_65058269_C_T_b37	Independent	5.68698	NaN	NaN	-0.491424	-0.801113	-0.181736	0.328456	0.170396	0.486515	-0.162969	NaN	NaN
ADPSBQ	ENSG00000166341.6	11_6676285_A_G_b37	11_7022945_C_A_b37	Independent	5.4644	NaN	NaN	0.234313	0.13201	0.336616	-0.222784	-0.325599	-0.119969	0.0115288	NaN	NaN
ADPSBQ	ENSG00000172613.3	11_66898492_G_A_b37	11_67024534_C_T_b37	Independent	5.33157	NaN	NaN	0.545075	0.445077	0.645073	-0.224659	-0.332586	-0.116732	0.320416	NaN	NaN
ADPSBQ	ENSG00000172932.10	11_67182371_T_A_b37	11_67144371_T_A_b37	Independent	5.59471	NaN	NaN	0.376104	0.275642	0.476565	0.161505	0.0796694	0.24334	0.537608	NaN	NaN
ADPSBQ	ENSG00000167792.7	11_67375184_T_G_b37	11_66902289_A_C_b37	Independent	5.37916	NaN	NaN	0.0853071	0.0561961	0.114418	0.206051	0.0750377	0.337064	0.291358	NaN	NaN
ADPSBQ	ENSG00000254838.4	11_6762513_G_T_b37	11_6767609_G_A_b37	Independent	5.68698	NaN	NaN	-1.02867	-1.39078	-0.666563	0.722913	0.369688	1.07614	-0.305759	NaN	NaN
ADPSBQ	ENSG00000255031.1	11_67931459_C_T_b37	11_67816936_A_G_b37	Independent	-3.41914	-28.6771	5.21067	-0.41904	-0.557938	-0.280143	0.332583	0.214067	0.451099	-0.0864572	NaN	NaN
ADPSBQ	ENSG00000069482.6	11_68394457_C_G_b37	11_67740030_C_T_b37	Independent	5.41506	NaN	NaN	-1.09406	-1.54567	-0.642453	-0.673415	-1.17102	-0.175813	-1.76747	NaN	NaN
ADPSBQ	ENSG00000250508.1	11_68681653_A_G_b37	11_68636628_C_CA_b37	Independent	1.82145	NaN	NaN	-0.792773	-1.04795	-0.537594	-0.563932	-0.872686	-0.255179	-1.35671	NaN	NaN
ADPSBQ	ENSG00000132740.4	11_68699775_G_A_b37	11_68655063_C_A_b37	Independent	5.68312	NaN	NaN	0.33441	0.266765	0.402054	-0.188078	-0.256246	-0.11991	0.146332	NaN	NaN
ADPSBQ	ENSG00000172927.3	11_69088554_C_T_b37	11_69177680_GATATA_G_b37	Independent	2.43975	NaN	NaN	1.83693	1.45129	2.22257	-0.745436	-1.17734	-0.313531	1.0915	NaN	NaN
ADPSBQ	ENSG00000149054.10	11_6941739_T_C_b37	11_6948376_C_CG_b37	Independent	2.99177	NaN	NaN	1.23149	1.05832	1.40467	-0.544974	-0.712599	-0.37735	0.68652	NaN	NaN
ADPSBQ	ENSG00000131626.11	11_70485128_A_AC_b37	11_70105634_T_C_b37	Independent	5.36184	NaN	NaN	-0.378445	-0.449249	-0.307641	0.105961	0.0355806	0.176342	-0.272484	NaN	NaN
ADPSBQ	ENSG00000175581.9	11_73395805_AAG_A_b37	11_73500926_G_T_b37	Independent	3.49851	NaN	NaN	0.528224	0.4142	0.642248	-0.286937	-0.424075	-0.1498	0.241287	NaN	NaN
ADPSBQ	ENSG00000168014.12	11_73773783_T_C_b37	11_73558292_T_C_b37	Independent	5.66962	NaN	NaN	-0.424219	-0.566019	-0.282419	-0.171184	-0.25164	-0.0907279	-0.595403	NaN	NaN
ADPSBQ	ENSG00000165434.6	11_73892988_A_T_b37	11_74100540_G_A_b37	Independent	4.99396	NaN	NaN	-0.254439	-0.353053	-0.155825	-0.695145	-1.05621	-0.334084	-0.949584	NaN	NaN
ADPSBQ	ENSG00000251364.2	11_7528330_G_C_b37	11_7510330_A_G_b37	Independent	-0.58464	-26.0178	5.12888	-0.884335	-1.02938	-0.739285	0.540431	0.347043	0.733819	-0.343904	NaN	NaN
ADPSBQ	ENSG00000254632.1	11_76478854_C_T_b37	11_76925641_C_T_b37	Independent	4.02915	NaN	NaN	1.30755	1.10201	1.51308	-0.821395	-1.45891	-0.183884	0.486152	NaN	NaN
ADPSBQ	ENSG00000166394.10	11_7675579_A_C_b37	11_7810979_C_T_b37	Independent	5.10651	NaN	NaN	0.449858	0.316826	0.58289	0.21023	0.0956036	0.324856	0.660088	NaN	NaN
ADPSBQ	ENSG00000174915.7	11_815635_G_A_b37	11_511213_T_C_b37	Independent	5.53733	NaN	NaN	-0.104065	-0.157285	-0.0508463	0.441195	0.242289	0.640101	0.337129	NaN	NaN
ADPSBQ	ENSG00000165490.8	11_82563317_T_TC_b37	11_82625273_G_A_b37	Independent	5.24154	NaN	NaN	-0.46892	-0.603663	-0.334178	-0.579935	-0.851026	-0.308843	-1.04886	NaN	NaN
ADPSBQ	ENSG00000246067.3	11_82783814_C_T_b37	11_82788439_C_T_b37	Independent	4.39933	NaN	NaN	-0.453945	-0.570517	-0.337373	-0.655615	-0.831029	-0.480201	-1.10956	NaN	NaN
ADPSBQ	ENSG00000214063.6	11_856020_T_C_b37	11_842775_G_A_b37	Independent	5.56068	NaN	NaN	0.171599	0.10887	0.234329	0.242293	0.0766449	0.407941	0.413892	NaN	NaN
ADPSBQ	ENSG00000149196.11	11_86011813_C_T_b37	11_86214770_G_A_b37	Independent	5.68358	NaN	NaN	-0.449619	-0.636671	-0.262567	-0.160469	-0.238779	-0.0821587	-0.610088	NaN	NaN
ADPSBQ	ENSG00000166436.11	11_8704965_C_T_b37	11_8697227_C_T_b37	Independent	5.43872	NaN	NaN	0.618007	0.55208	0.683934	0.188459	0.117568	0.25935	0.806467	NaN	NaN
ADPSBQ	ENSG00000123892.7	11_87998952_T_C_b37	11_87885082_A_G_b37	Independent	5.68976	NaN	NaN	-0.590946	-0.797134	-0.384757	0.503421	0.284231	0.72261	-0.0875249	NaN	NaN
ADPSBQ	ENSG00000175348.6	11_8986019_G_C_b37	11_8975748_A_C_b37	Independent	5.67332	NaN	NaN	-0.13569	-0.182372	-0.0890077	-0.21623	-0.308619	-0.123841	-0.35192	NaN	NaN
ADPSBQ	ENSG00000254860.1	11_8987438_C_T_b37	11_9042331_G_T_b37	Independent	5.43901	NaN	NaN	1.40409	1.26212	1.54605	-0.402971	-0.558798	-0.247144	1.00112	NaN	NaN
ADPSBQ	ENSG00000166004.10	11_93372183_T_C_b37	11_93410687_C_T_b37	Independent	4.49828	NaN	NaN	-0.274314	-0.393475	-0.155154	-0.0960738	-0.146168	-0.0459798	-0.370388	NaN	NaN
ADPSBQ	ENSG00000182919.10	11_93490307_C_T_b37	11_93032474_CAT_C_b37	Independent	5.47514	NaN	NaN	-0.376182	-0.427065	-0.325298	-0.419888	-0.634211	-0.205566	-0.79607	NaN	NaN
ADPSBQ	ENSG00000180771.10	11_94788736_G_T_b37	11_95297577_G_A_b37	Independent	4.64288	NaN	NaN	0.638949	0.358334	0.919563	-0.118361	-0.1892	-0.047523	0.520587	NaN	NaN
ADPSBQ	ENSG00000075089.5	12_100409027_G_C_b37	12_100640887_A_G_b37	Independent	5.65599	NaN	NaN	-0.106738	-0.15176	-0.061716	-0.312286	-0.488216	-0.136357	-0.419025	NaN	NaN
ADPSBQ	ENSG00000225231.1	12_10096086_G_C_b37	12_10118747_G_C_b37	Independent	5.23446	NaN	NaN	1.95038	1.70709	2.19366	0.273524	0.0835935	0.463454	2.2239	NaN	NaN
ADPSBQ	ENSG00000111666.6	12_102134643_A_G_b37	12_102092989_C_A_b37	Independent	-2.04803	-15.7916	5.44653	0.41063	0.33496	0.4863	-0.205557	-0.283864	-0.12725	0.205073	NaN	NaN
ADPSBQ	ENSG00000136052.5	12_105436187_TG_T_b37	12_105086397_G_A_b37	Independent	4.79771	NaN	NaN	0.419162	0.219082	0.619242	-0.232079	-0.331392	-0.132766	0.187083	NaN	NaN
ADPSBQ	ENSG00000002016.12	12_1054956_C_T_b37	12_1039536_A_C_b37	Independent	5.45705	NaN	NaN	-0.572767	-0.671055	-0.474479	-0.269695	-0.34169	-0.1977	-0.842462	NaN	NaN
ADPSBQ	ENSG00000257890.1	12_106464063_T_G_b37	12_106452814_G_T_b37	Independent	5.10731	NaN	NaN	-0.557476	-0.738531	-0.376421	-0.42425	-0.618667	-0.229833	-0.981726	NaN	NaN
ADPSBQ	ENSG00000139445.13	12_109042354_G_T_b37	12_109686721_T_C_b37	Independent	5.7943	NaN	NaN	-0.866602	-1.14814	-0.585069	-6.64386	-69.3104	56.0227	-7.51046	NaN	NaN
ADPSBQ	ENSG00000139433.5	12_110829036_A_C_b37	12_110292513_G_A_b37	Independent	5.69285	NaN	NaN	-0.134223	-0.181944	-0.0865019	0.13349	0.0754979	0.191482	-0.000733231	NaN	NaN
ADPSBQ	ENSG00000256274.1	12_11204607_G_C_b37	12_10754224_G_A_b37	Independent	1.00912	NaN	NaN	-1.23431	-1.42331	-1.0453	-0.953354	-1.46143	-0.445278	-2.18766	NaN	NaN
ADPSBQ	ENSG00000151176.3	12_113826003_T_C_b37	12_113830657_C_T_b37	Independent	5.68698	NaN	NaN	0.296705	0.201049	0.392361	0.379994	0.227081	0.532907	0.676699	NaN	NaN
ADPSBQ	ENSG00000176834.9	12_118537679_G_A_b37	12_118508659_T_C_b37	Independent	5.67381	NaN	NaN	0.291517	0.223881	0.359152	0.275366	0.182289	0.368442	0.566882	NaN	NaN
ADPSBQ	ENSG00000110871.10	12_121046345_C_T_b37	12_120913921_CAG_C_b37	Independent	5.64191	NaN	NaN	0.288936	0.237796	0.340076	0.548358	0.362649	0.734066	0.837294	NaN	NaN
ADPSBQ	ENSG00000271769.1	12_121087347_T_C_b37	12_121693107_T_A_b37	Independent	4.52179	NaN	NaN	-0.469273	-4.71282	3.77428	-0.34684	-0.826838	0.133157	-0.816114	NaN	NaN
ADPSBQ	ENSG00000157895.7	12_121444700_A_G_b37	12_121440263_G_A_b37	Independent	5.69329	NaN	NaN	0.387001	0.321869	0.452133	0.205331	0.143471	0.267191	0.592332	NaN	NaN
ADPSBQ	ENSG00000135124.10	12_121703167_GTA_G_b37	12_121648132_G_T_b37	Independent	5.43808	NaN	NaN	-0.423747	-0.58108	-0.266414	0.145185	0.052211	0.23816	-0.278561	NaN	NaN
ADPSBQ	ENSG00000256092.2	12_123819553_T_C_b37	12_123840020_G_C_b37	Independent	5.6058	NaN	NaN	1.48333	1.1607	1.80595	0.677411	0.242819	1.112	2.16074	NaN	NaN
ADPSBQ	ENSG00000111364.11	12_124105908_A_G_b37	12_124090814_G_A_b37	Independent	5.67567	NaN	NaN	-0.145732	-0.196415	-0.0950483	0.260729	0.193134	0.328323	0.114997	NaN	NaN
ADPSBQ	ENSG00000185344.9	12_124165056_C_T_b37	12_123245569_A_G_b37	Independent	4.50352	NaN	NaN	0.170292	0.120991	0.219594	-0.258233	-0.527255	0.0107891	-0.0879406	NaN	NaN
ADPSBQ	ENSG00000111328.2	12_124331814_C_T_b37	12_123725395_C_T_b37	Independent	5.50533	NaN	NaN	-0.30193	-0.372396	-0.231464	0.210741	0.0836191	0.337863	-0.0911892	NaN	NaN
ADPSBQ	ENSG00000197653.10	12_124389150_C_A_b37	12_124387991_G_A_b37	Independent	5.68698	NaN	NaN	2.81918	2.4754	3.16296	0.389227	0.237507	0.540948	3.20841	NaN	NaN
ADPSBQ	ENSG00000119242.4	12_124499839_C_T_b37	12_124581237_G_T_b37	Independent	2.41863	NaN	NaN	0.215738	0.125412	0.306063	-0.206644	-0.28314	-0.130148	0.0090936	NaN	NaN
ADPSBQ	ENSG00000165714.6	12_12617367_A_G_b37	12_11542431_G_C_b37	Independent	5.32873	NaN	NaN	-0.214104	-0.286665	-0.141543	-0.314425	-0.461635	-0.167215	-0.528529	NaN	NaN
ADPSBQ	ENSG00000111450.9	12_131323442_C_T_b37	12_131274394_A_T_b37	Independent	5.30787	NaN	NaN	0.433093	0.380382	0.485803	-0.366455	-0.471534	-0.261375	0.0666383	NaN	NaN
ADPSBQ	ENSG00000084444.9	12_13225007_C_T_b37	12_13023180_C_T_b37	Independent	5.42863	NaN	NaN	-0.295891	-0.393472	-0.19831	0.165098	0.0820694	0.248127	-0.130793	NaN	NaN
ADPSBQ	ENSG00000185163.5	12_132253176_C_T_b37	12_132635989_A_G_b37	Independent	5.5597	NaN	NaN	0.113502	0.0707987	0.156205	-0.155597	-0.23526	-0.0759347	-0.0420957	NaN	NaN
ADPSBQ	ENSG00000185684.8	12_132568660_A_G_b37	12_132592297_C_G_b37	Independent	5.68017	NaN	NaN	0.413771	0.28477	0.542771	-0.593941	-0.68241	-0.505471	-0.18017	NaN	NaN
ADPSBQ	ENSG00000198040.6	12_133369473_A_C_b37	12_132807871_C_T_b37	Independent	1.70766	NaN	NaN	-0.264041	-0.376169	-0.151912	0.0741643	0.0295336	0.118795	-0.189877	NaN	NaN
ADPSBQ	ENSG00000196458.6	12_133496141_A_G_b37	12_133383758_G_A_b37	Independent	5.54908	NaN	NaN	0.471115	0.376807	0.565423	-0.742456	-1.06699	-0.417922	-0.271341	NaN	NaN
ADPSBQ	ENSG00000249628.2	12_1609593_C_A_b37	12_1618090_C_T_b37	Independent	5.20345	NaN	NaN	-1.33067	-1.57186	-1.08948	0.592108	0.319638	0.864578	-0.738564	NaN	NaN
ADPSBQ	ENSG00000111728.6	12_22456416_G_A_b37	12_22726453_T_A_b37	Independent	5.48894	NaN	NaN	0.592973	0.393412	0.792534	-1.99785	-3.88609	-0.109615	-1.40488	NaN	NaN
ADPSBQ	ENSG00000151062.10	12_2349081_A_C_b37	12_1901546_A_C_b37	Independent	-0.948801	-20.6602	5.68358	0.319118	0.222344	0.415893	0.400883	0.242067	0.559698	0.720001	NaN	NaN
ADPSBQ	ENSG00000064115.6	12_27103588_A_G_b37	12_26860581_A_C_b37	Independent	5.43073	NaN	NaN	0.442564	0.331635	0.553493	0.127481	0.059725	0.195237	0.570045	NaN	NaN
ADPSBQ	ENSG00000087502.13	12_29455197_G_T_b37	12_29496991_C_T_b37	Independent	5.18276	NaN	NaN	-0.172549	-0.216553	-0.128545	-0.146853	-0.224575	-0.0691318	-0.319402	NaN	NaN
ADPSBQ	ENSG00000110888.13	12_30968662_A_G_b37	12_30724760_T_C_b37	Independent	3.15519	NaN	NaN	0.16413	0.111239	0.217021	0.120558	0.0665231	0.174592	0.284688	NaN	NaN
ADPSBQ	ENSG00000188906.9	12_39743909_T_C_b37	12_40620808_C_G_b37	Independent	5.60546	NaN	NaN	0.331482	0.234859	0.428105	-0.705055	-1.10259	-0.307516	-0.373573	NaN	NaN
ADPSBQ	ENSG00000139168.3	12_42743598_C_T_b37	12_42146731_TG_T_b37	Independent	5.05025	NaN	NaN	0.0944077	0.0285857	0.16023	0.102868	0.0253154	0.180421	0.197276	NaN	NaN
ADPSBQ	ENSG00000079337.11	12_48143102_T_TCTCTGGG_b37	12_48144634_T_TG_b37	Independent	3.65663	NaN	NaN	0.221508	0.0413304	0.401685	0.14534	0.037195	0.253486	0.366848	NaN	NaN
ADPSBQ	ENSG00000135480.10	12_52634956_C_T_b37	12_51930358_A_G_b37	Independent	5.5879	NaN	NaN	1.86353	1.60536	2.1217	2.18534	1.31425	3.05643	4.04887	NaN	NaN
ADPSBQ	ENSG00000063046.13	12_53401481_G_T_b37	12_53429159_TC_T_b37	Independent	5.65948	NaN	NaN	-0.191958	-0.244417	-0.139498	-0.126915	-0.196173	-0.0576572	-0.318873	NaN	NaN
ADPSBQ	ENSG00000111077.13	12_53610645_C_T_b37	12_53443278_T_G_b37	Independent	0.43706	NaN	NaN	0.102795	0.0562822	0.149307	-0.198054	-0.338965	-0.057143	-0.0952592	NaN	NaN
ADPSBQ	ENSG00000248265.1	12_54578882_C_T_b37	12_54511789_G_C_b37	Independent	5.05573	NaN	NaN	1.71234	1.55499	1.8697	0.474661	0.299505	0.649817	2.187	NaN	NaN
ADPSBQ	ENSG00000135437.5	12_56213297_G_T_b37	12_56120768_A_G_b37	Independent	5.69373	NaN	NaN	-0.656393	-0.823356	-0.48943	-1.17957	-1.68691	-0.672219	-1.83596	NaN	NaN
ADPSBQ	ENSG00000170581.9	12_56783293_G_GA_b37	12_56679751_A_G_b37	Independent	5.6058	NaN	NaN	-0.408641	-0.542021	-0.275261	0.414339	0.235047	0.59363	0.00569791	NaN	NaN
ADPSBQ	ENSG00000118596.7	12_60171528_T_C_b37	12_60149234_T_C_b37	Independent	5.66988	NaN	NaN	0.492888	0.350353	0.635423	-0.951782	-1.50928	-0.39428	-0.458894	NaN	NaN
ADPSBQ	ENSG00000135655.9	12_62631026_C_G_b37	12_62639520_TA_T_b37	Independent	5.63121	NaN	NaN	0.243182	0.163097	0.323268	0.228164	0.125766	0.330561	0.471346	NaN	NaN
ADPSBQ	ENSG00000215039.2	12_6560573_G_T_b37	12_6556078_C_T_b37	Independent	4.28481	NaN	NaN	0.316662	0.241013	0.392312	0.225422	0.155374	0.295471	0.542085	NaN	NaN
ADPSBQ	ENSG00000111639.3	12_6602433_G_A_b37	12_6594883_T_A_b37	Independent	5.68358	NaN	NaN	-0.511151	-0.568109	-0.454193	-0.085411	-0.140781	-0.0300412	-0.596562	NaN	NaN
ADPSBQ	ENSG00000239335.4	12_66581382_G_A_b37	12_66512993_A_G_b37	Independent	5.59178	NaN	NaN	-1.56534	-1.76011	-1.37058	-0.645524	-0.857029	-0.434019	-2.21087	NaN	NaN
ADPSBQ	ENSG00000126746.13	12_6787622_C_T_b37	12_6853615_C_T_b37	Independent	5.60712	NaN	NaN	0.199514	0.145783	0.253246	0.100743	0.0422835	0.159202	0.300257	NaN	NaN
ADPSBQ	ENSG00000089693.6	12_6861928_G_T_b37	12_6859729_G_A_b37	Independent	5.64191	NaN	NaN	0.145812	0.102656	0.188968	-0.143511	-0.243834	-0.0431874	0.0023014	NaN	NaN
ADPSBQ	ENSG00000010610.5	12_6902002_G_T_b37	12_6573717_G_A_b37	Independent	5.51224	NaN	NaN	0.274473	0.174739	0.374206	-0.705585	-1.10831	-0.302862	-0.431112	NaN	NaN
ADPSBQ	ENSG00000111581.5	12_69077497_T_C_b37	12_69150934_A_G_b37	Independent	5.66988	NaN	NaN	-0.266624	-0.319897	-0.213351	-0.631405	-0.89624	-0.36657	-0.898029	NaN	NaN
ADPSBQ	ENSG00000111665.7	12_6948468_T_C_b37	12_6553829_G_GT_b37	Independent	5.18251	NaN	NaN	-0.412436	-0.570152	-0.254721	-0.221216	-0.541762	0.0993294	-0.633653	NaN	NaN
ADPSBQ	ENSG00000127337.2	12_69787364_AAAG_A_b37	12_69752509_G_T_b37	Independent	5.66988	NaN	NaN	-0.503656	-0.572048	-0.435263	0.399731	0.250467	0.548995	-0.103925	NaN	NaN
ADPSBQ	ENSG00000135643.4	12_70319391_A_G_b37	12_70028424_T_TTC_b37	Independent	5.62557	NaN	NaN	0.438491	0.275308	0.601673	0.338825	0.172721	0.504929	0.777315	NaN	NaN
ADPSBQ	ENSG00000256967.1	12_7266805_A_G_b37	12_7264406_C_T_b37	Independent	5.69036	NaN	NaN	0.942611	0.654603	1.23062	-0.619713	-0.907659	-0.331767	0.322898	NaN	NaN
ADPSBQ	ENSG00000139182.9	12_7423648_C_T_b37	12_7262024_C_T_b37	Independent	1.41191	NaN	NaN	0.351426	0.212067	0.490786	1.1195	0.766	1.473	1.47093	NaN	NaN
ADPSBQ	ENSG00000205885.3	12_7897767_G_T_b37	12_7264207_A_C_b37	Independent	5.57973	NaN	NaN	-0.571004	-0.864587	-0.277421	-0.539092	-1.27817	0.199983	-1.1101	NaN	NaN
ADPSBQ	ENSG00000067715.9	12_78991289_A_C_b37	12_79371460_C_T_b37	Independent	5.06377	NaN	NaN	-1.15606	-1.36776	-0.944353	-1.44872	-2.36967	-0.527764	-2.60478	NaN	NaN
ADPSBQ	ENSG00000257431.1	12_82723650_C_A_b37	12_82889759_C_G_b37	Independent	5.67675	NaN	NaN	1.88173	1.54714	2.21631	0.977825	0.742693	1.21296	2.85955	NaN	NaN
ADPSBQ	ENSG00000235602.4	12_8280627_A_G_b37	12_8287961_G_A_b37	Independent	5.56838	NaN	NaN	-0.704537	-0.904975	-0.5041	0.311315	0.17145	0.451179	-0.393223	NaN	NaN
ADPSBQ	ENSG00000198707.10	12_88510729_A_C_b37	12_88626298_G_A_b37	Independent	5.64545	NaN	NaN	-0.181192	-0.283463	-0.0789201	0.370173	0.247365	0.492981	0.188981	NaN	NaN
ADPSBQ	ENSG00000257194.2	12_90543932_C_T_b37	12_90047296_G_C_b37	Independent	5.65204	NaN	NaN	-6.64384	-81.5766	68.2889	-0.480033	-0.682905	-0.27716	-7.12388	NaN	NaN
ADPSBQ	ENSG00000256069.3	12_9393573_T_C_b37	12_9412883_A_T_b37	Independent	5.5226	NaN	NaN	-1.33501	-1.52497	-1.14505	-0.898559	-1.26489	-0.532231	-2.23357	NaN	NaN
ADPSBQ	ENSG00000139343.6	12_95353787_T_G_b37	12_96212095_G_A_b37	Independent	5.53322	NaN	NaN	0.226102	0.157092	0.295112	0.131257	0.0778547	0.184659	0.357359	NaN	NaN
ADPSBQ	ENSG00000214776.5	12_9588507_G_C_b37	12_9623175_G_A_b37	Independent	5.53733	NaN	NaN	-2.87509	-4.56705	-1.18313	-2.03549	-3.60861	-0.462379	-4.91058	NaN	NaN
ADPSBQ	ENSG00000260423.1	12_9620950_C_G_b37	12_9535228_C_G_b37	Independent	5.63121	NaN	NaN	-0.684986	-0.876796	-0.493175	-1.77065	-2.97348	-0.567826	-2.45564	NaN	NaN
ADPSBQ	ENSG00000139344.3	12_96347579_A_G_b37	12_96322524_T_C_b37	Independent	4.92286	NaN	NaN	0.793157	0.580139	1.00617	0.423107	0.219335	0.626879	1.21626	NaN	NaN
ADPSBQ	ENSG00000111144.5	12_96431007_C_G_b37	12_96441222_C_T_b37	Independent	3.62164	NaN	NaN	0.139189	0.086362	0.192015	0.362401	0.160631	0.564172	0.50159	NaN	NaN
ADPSBQ	ENSG00000059758.3	12_96523362_T_C_b37	12_97649107_A_G_b37	Independent	5.64191	NaN	NaN	-0.161248	-0.255058	-0.0674382	-0.37075	-0.613779	-0.127721	-0.531998	NaN	NaN
ADPSBQ	ENSG00000069493.10	12_9817395_A_G_b37	12_9480532_G_A_b37	Independent	3.75187	NaN	NaN	-1.0263	-1.24753	-0.805065	0.185441	0.107518	0.263365	-0.840857	NaN	NaN
ADPSBQ	ENSG00000256594.3	12_9823140_G_A_b37	12_9808721_G_T_b37	Independent	4.96883	NaN	NaN	-0.76773	-0.945938	-0.589521	0.225109	0.130578	0.319641	-0.54262	NaN	NaN
ADPSBQ	ENSG00000260992.1	13_100121671_C_T_b37	13_99625717_A_G_b37	Independent	1.93602	NaN	NaN	-0.485187	-0.589541	-0.380833	0.497799	0.293147	0.70245	0.0126114	NaN	NaN
ADPSBQ	ENSG00000125246.11	13_100518634_C_T_b37	13_100310109_A_C_b37	Independent	3.64402	NaN	NaN	-1.46004	-1.94869	-0.971398	-0.414563	-0.580218	-0.248908	-1.8746	NaN	NaN
ADPSBQ	ENSG00000224356.3	13_101208809_G_T_b37	13_100294795_A_C_b37	Independent	4.24495	NaN	NaN	0.67506	0.468926	0.881194	0.675048	0.400798	0.949298	1.35011	NaN	NaN
ADPSBQ	ENSG00000125247.11	13_101316223_G_A_b37	13_101327092_C_G_b37	Independent	2.43905	NaN	NaN	0.266948	0.168967	0.364928	-0.227675	-0.320889	-0.134461	0.0392727	NaN	NaN
ADPSBQ	ENSG00000134905.12	13_111358488_G_A_b37	13_111300000_T_C_b37	Independent	5.61996	NaN	NaN	0.218862	0.156162	0.281562	-0.285659	-0.388254	-0.183065	-0.0667974	NaN	NaN
ADPSBQ	ENSG00000169062.10	13_115038879_A_G_b37	13_115075587_GA_G_b37	Independent	1.77128	NaN	NaN	0.262809	0.206508	0.319109	-0.432885	-0.52718	-0.33859	-0.170077	NaN	NaN
ADPSBQ	ENSG00000032742.13	13_21268830_C_T_b37	13_21124368_G_C_b37	Independent	5.2592	NaN	NaN	0.310084	0.241769	0.378399	-0.12201	-0.18528	-0.0587394	0.188075	NaN	NaN
ADPSBQ	ENSG00000102699.5	13_25084316_C_A_b37	13_25265454_G_A_b37	Independent	4.37417	NaN	NaN	0.151161	0.0929979	0.209323	-0.536904	-0.728492	-0.345315	-0.385743	NaN	NaN
ADPSBQ	ENSG00000205822.6	13_25096347_A_C_b37	13_25154909_G_A_b37	Independent	2.94987	NaN	NaN	-1.21405	-1.5378	-0.890304	1.03213	0.510891	1.55337	-0.181923	NaN	NaN
ADPSBQ	ENSG00000139505.10	13_25802468_C_T_b37	13_25082462_G_A_b37	Independent	5.65948	NaN	NaN	0.304243	0.237385	0.371102	0.258902	0.11798	0.399823	0.563145	NaN	NaN
ADPSBQ	ENSG00000122033.10	13_28041329_G_A_b37	13_27984863_T_A_b37	Independent	4.57559	NaN	NaN	-0.257739	-0.311407	-0.204072	0.149785	0.0955114	0.204059	-0.107954	NaN	NaN
ADPSBQ	ENSG00000186184.11	13_28200461_G_A_b37	13_28195972_C_T_b37	Independent	5.63479	NaN	NaN	0.317139	0.266207	0.368072	0.105562	0.0515031	0.159621	0.422701	NaN	NaN
ADPSBQ	ENSG00000189403.10	13_31037903_G_C_b37	13_31044885_A_G_b37	Independent	5.68017	NaN	NaN	-0.391846	-0.507169	-0.276522	-0.120193	-0.161993	-0.0783935	-0.512039	NaN	NaN
ADPSBQ	ENSG00000102802.5	13_31467911_T_C_b37	13_31485323_A_C_b37	Independent	4.90644	NaN	NaN	0.416222	0.244399	0.588044	-0.577263	-0.79901	-0.355515	-0.161041	NaN	NaN
ADPSBQ	ENSG00000175664.5	13_31541657_C_T_b37	13_31553036_T_C_b37	Independent	5.68358	NaN	NaN	2.27935	1.34662	3.21208	-1.74597	-2.69652	-0.795428	0.533373	NaN	NaN
ADPSBQ	ENSG00000120669.11	13_36815468_A_C_b37	13_36872248_GA_G_b37	Independent	5.59023	NaN	NaN	1.02977	0.775842	1.28369	0.638113	0.373754	0.902473	1.66788	NaN	NaN
ADPSBQ	ENSG00000102763.11	13_42535257_A_T_b37	13_42991002_C_A_b37	Independent	4.8908	NaN	NaN	-0.186014	-0.272477	-0.0995514	0.483226	0.286798	0.679654	0.297212	NaN	NaN
ADPSBQ	ENSG00000120658.8	13_43909697_G_A_b37	13_44564400_T_C_b37	Independent	3.65269	NaN	NaN	0.471336	0.29571	0.646963	0.396027	0.23374	0.558314	0.867364	NaN	NaN
ADPSBQ	ENSG00000170919.11	13_45946982_C_A_b37	13_45955936_C_A_b37	Independent	5.68017	NaN	NaN	1.56864	1.39651	1.74076	-0.483467	-0.703592	-0.263342	1.08517	NaN	NaN
ADPSBQ	ENSG00000102468.6	13_47916735_CA_C_b37	13_48030736_A_T_b37	Independent	4.13617	NaN	NaN	1.18205	0.755538	1.60856	0.624685	0.366152	0.883218	1.80674	NaN	NaN
ADPSBQ	ENSG00000123179.9	13_50283389_T_C_b37	13_50264200_A_C_b37	Independent	2.1981	NaN	NaN	-0.603923	-0.685904	-0.521942	-0.28674	-0.348583	-0.224897	-0.890663	NaN	NaN
ADPSBQ	ENSG00000136104.14	13_51484356_C_T_b37	13_51484003_G_C_b37	Independent	5.65249	NaN	NaN	-1.75975	-2.14808	-1.37141	0.174854	0.131571	0.218137	-1.58489	NaN	NaN
ADPSBQ	ENSG00000226792.2	13_51772847_A_T_b37	13_51743011_TTCC_T_b37	Independent	-2.8682	-20.5877	4.71303	-0.755149	-1.00426	-0.506038	1.64116	1.38416	1.89816	0.886007	NaN	NaN
ADPSBQ	ENSG00000102554.9	13_73632830_AC_A_b37	13_73322235_C_G_b37	Independent	5.62028	NaN	NaN	-0.469602	-0.679596	-0.259608	0.357937	0.197235	0.518639	-0.111664	NaN	NaN
ADPSBQ	ENSG00000227354.2	13_79980609_C_A_b37	13_80151124_G_A_b37	Independent	5.66988	NaN	NaN	1.09033	0.957346	1.22332	-0.456693	-0.707933	-0.205454	0.63364	NaN	NaN
ADPSBQ	ENSG00000102595.14	13_96550754_A_G_b37	13_96691116_G_A_b37	Independent	5.47579	NaN	NaN	0.374283	0.29681	0.451756	0.195558	0.121336	0.26978	0.569841	NaN	NaN
ADPSBQ	ENSG00000165621.4	13_97652301_A_G_b37	13_97607688_T_C_b37	Independent	-1.2552	-15.611	5.66209	-1.08209	-1.31234	-0.851844	0.661574	0.427333	0.895814	-0.42052	NaN	NaN
ADPSBQ	ENSG00000182218.5	14_100111052_A_G_b37	14_100150445_G_A_b37	Independent	5.56552	NaN	NaN	-0.592589	-0.735543	-0.449636	-0.35244	-0.51558	-0.189301	-0.94503	NaN	NaN
ADPSBQ	ENSG00000269940.1	14_103666727_T_C_b37	14_104157489_C_T_b37	Independent	5.63215	NaN	NaN	-0.468502	-0.642426	-0.294578	-0.611827	-0.895963	-0.32769	-1.08033	NaN	NaN
ADPSBQ	ENSG00000224997.1	14_104167938_G_A_b37	14_104166733_C_T_b37	Independent	5.67675	NaN	NaN	0.967355	0.840985	1.09373	0.646331	0.401863	0.890799	1.61369	NaN	NaN
ADPSBQ	ENSG00000269963.1	14_104244583_C_T_b37	14_104166733_C_T_b37	Independent	5.61313	NaN	NaN	1.10114	0.936259	1.26603	0.42919	0.238551	0.619829	1.53033	NaN	NaN
ADPSBQ	ENSG00000166183.11	14_104550471_G_C_b37	14_105365456_C_G_b37	Independent	5.02123	NaN	NaN	-1.50003	-2.1069	-0.893153	-0.764728	-1.13568	-0.393777	-2.26475	NaN	NaN
ADPSBQ	ENSG00000184990.8	14_105213904_G_A_b37	14_105230384_C_T_b37	Independent	5.56068	NaN	NaN	-0.193424	-0.292894	-0.0939537	-0.191454	-0.289774	-0.093135	-0.384878	NaN	NaN
ADPSBQ	ENSG00000099814.11	14_105328202_G_A_b37	14_105312935_C_T_b37	Independent	5.64191	NaN	NaN	-0.318714	-0.402154	-0.235274	-0.333391	-0.457478	-0.209304	-0.652105	NaN	NaN
ADPSBQ	ENSG00000092094.6	14_20923007_C_A_b37	14_20923149_T_G_b37	Independent	5.59099	NaN	NaN	0.334336	0.277612	0.391059	-0.177206	-0.240519	-0.113892	0.15713	NaN	NaN
ADPSBQ	ENSG00000258515.1	14_20923007_C_A_b37	14_20919192_C_T_b37	Independent	4.80436	NaN	NaN	0.51859	0.364281	0.672899	-0.294656	-0.460155	-0.129157	0.223934	NaN	NaN
ADPSBQ	ENSG00000129562.6	14_23056123_C_A_b37	14_23042620_AAAAAAAAAC_A_b37	Independent	5.66643	NaN	NaN	-0.294639	-0.378003	-0.211275	0.0919859	0.0373751	0.146597	-0.202653	NaN	NaN
ADPSBQ	ENSG00000100461.13	14_23364106_G_A_b37	14_23369990_T_TTA_b37	Independent	4.236	NaN	NaN	-0.439604	-0.581311	-0.297897	-0.110827	-0.157361	-0.0642928	-0.550431	NaN	NaN
ADPSBQ	ENSG00000100804.14	14_23497629_C_T_b37	14_23504021_G_A_b37	Independent	5.67332	NaN	NaN	-0.272962	-0.360452	-0.185472	0.143439	0.0980602	0.188818	-0.129523	NaN	NaN
ADPSBQ	ENSG00000100908.9	14_24594733_G_A_b37	14_24593414_C_G_b37	Independent	5.68358	NaN	NaN	-0.158921	-0.229117	-0.0887251	0.390331	0.257124	0.523538	0.23141	NaN	NaN
ADPSBQ	ENSG00000100441.5	14_24901844_A_G_b37	14_24899194_C_T_b37	Independent	5.52175	NaN	NaN	-0.218994	-0.266229	-0.171759	-0.1568	-0.217284	-0.0963168	-0.375795	NaN	NaN
ADPSBQ	ENSG00000100445.12	14_24915271_G_C_b37	14_24905533_G_A_b37	Independent	5.68358	NaN	NaN	-0.572381	-0.718918	-0.425843	0.258643	0.152695	0.364591	-0.313737	NaN	NaN
ADPSBQ	ENSG00000092010.10	14_25592149_C_G_b37	14_24129048_T_TA_b37	Independent	-10.6274	-30.4713	5.65948	0.380584	0.221939	0.539228	0.231947	0.109332	0.354563	0.612531	NaN	NaN
ADPSBQ	ENSG00000203546.3	14_31901285_A_G_b37	14_31750070_T_G_b37	Independent	5.63121	NaN	NaN	0.439061	0.287131	0.59099	2.28582	1.43615	3.13549	2.72488	NaN	NaN
ADPSBQ	ENSG00000129480.8	14_31915216_T_C_b37	14_31691075_A_G_b37	Independent	5.55595	NaN	NaN	-0.384064	-0.519528	-0.2486	0.209988	0.115284	0.304692	-0.174076	NaN	NaN
ADPSBQ	ENSG00000202337.1	14_32270651_G_A_b37	14_32641263_T_G_b37	Independent	5.2861	NaN	NaN	-0.333713	-0.460403	-0.207024	-0.344896	-0.478829	-0.210962	-0.678609	NaN	NaN
ADPSBQ	ENSG00000100890.11	14_35489123_C_T_b37	14_35788948_A_G_b37	Independent	5.49806	NaN	NaN	0.209416	0.147399	0.271434	-0.138173	-0.198014	-0.078332	0.0712434	NaN	NaN
ADPSBQ	ENSG00000151338.14	14_37705023_C_T_b37	14_37980887_A_T_b37	Independent	5.17032	NaN	NaN	0.19499	0.122154	0.267826	-0.363443	-0.515067	-0.21182	-0.168453	NaN	NaN
ADPSBQ	ENSG00000165502.6	14_50071538_TTTCTGCC_T_b37	14_50105746_C_G_b37	Independent	4.86626	NaN	NaN	0.379988	0.317056	0.44292	0.131568	0.074876	0.18826	0.511556	NaN	NaN
ADPSBQ	ENSG00000100504.12	14_51433214_G_C_b37	14_51117989_GAAT_G_b37	Independent	5.39343	NaN	NaN	0.216343	0.11733	0.315357	-0.458782	-0.693675	-0.223888	-0.242438	NaN	NaN
ADPSBQ	ENSG00000168229.3	14_52366776_G_C_b37	14_52734092_T_C_b37	Independent	5.50681	NaN	NaN	0.702585	0.510625	0.894544	0.378768	0.220206	0.537331	1.08135	NaN	NaN
ADPSBQ	ENSG00000100526.15	14_54589973_C_T_b37	14_54192472_C_T_b37	Independent	4.50946	NaN	NaN	-0.890282	-1.59712	-0.183442	0.378611	0.019156	0.738066	-0.511671	NaN	NaN
ADPSBQ	ENSG00000131981.11	14_55701616_C_T_b37	14_55724222_A_G_b37	Independent	5.63479	NaN	NaN	-1.09998	-1.67626	-0.523698	-0.375616	-0.545249	-0.205982	-1.4756	NaN	NaN
ADPSBQ	ENSG00000259969.1	14_58598706_T_C_b37	14_58462027_A_G_b37	Independent	5.6781	NaN	NaN	-0.575532	-0.751187	-0.399877	0.428562	0.275962	0.581161	-0.14697	NaN	NaN
ADPSBQ	ENSG00000139971.11	14_58619879_C_CTGTT_b37	14_58471355_T_C_b37	Independent	4.96744	NaN	NaN	0.440452	0.328587	0.552318	0.342746	0.191414	0.494077	0.783198	NaN	NaN
ADPSBQ	ENSG00000257621.3	14_58720862_G_A_b37	14_58733845_G_A_b37	Independent	5.68017	NaN	NaN	0.165768	0.100975	0.230561	-0.230057	-0.368059	-0.0920554	-0.0642894	NaN	NaN
ADPSBQ	ENSG00000126790.7	14_59949448_G_C_b37	14_59956220_G_A_b37	Independent	2.13063	NaN	NaN	-0.691635	-0.790369	-0.592901	-0.511498	-0.691892	-0.331104	-1.20313	NaN	NaN
ADPSBQ	ENSG00000171723.11	14_67931404_T_C_b37	14_67652347_ATGTT_A_b37	Independent	3.83485	NaN	NaN	0.540112	0.329791	0.750432	0.120079	0.0440389	0.196119	0.660191	NaN	NaN
ADPSBQ	ENSG00000198133.4	14_67986275_T_C_b37	14_67938276_A_G_b37	Independent	5.21726	NaN	NaN	-0.37754	-0.519321	-0.23576	0.647462	0.364202	0.930721	0.269921	NaN	NaN
ADPSBQ	ENSG00000100564.4	14_68065543_G_C_b37	14_68057572_T_C_b37	Independent	5.66988	NaN	NaN	-0.254088	-0.310163	-0.198013	0.170053	0.0991046	0.241002	-0.0840348	NaN	NaN
ADPSBQ	ENSG00000133983.10	14_70847415_G_A_b37	14_70845363_T_C_b37	Independent	5.08474	NaN	NaN	-0.253653	-0.349114	-0.158192	0.0792842	0.036323	0.122245	-0.174369	NaN	NaN
ADPSBQ	ENSG00000119599.12	14_73393391_G_A_b37	14_73393878_G_A_b37	Independent	4.82118	NaN	NaN	0.413024	0.320864	0.505184	0.254228	0.182006	0.326449	0.667251	NaN	NaN
ADPSBQ	ENSG00000119673.10	14_73661127_AT_A_b37	14_74030518_T_A_b37	Independent	5.55683	NaN	NaN	-0.52	-0.625113	-0.414887	-1.42653	-2.29173	-0.56133	-1.94653	NaN	NaN
ADPSBQ	ENSG00000258376.1	14_73669126_C_T_b37	14_74018544_A_G_b37	Independent	5.0049	NaN	NaN	-1.0551	-1.70058	-0.409628	-0.457561	-0.711997	-0.203125	-1.51266	NaN	NaN
ADPSBQ	ENSG00000258695.2	14_74026618_C_T_b37	14_74040562_T_C_b37	Independent	5.41165	NaN	NaN	-0.58996	-0.804979	-0.37494	-0.674409	-1.12597	-0.222846	-1.26437	NaN	NaN
ADPSBQ	ENSG00000259065.1	14_74275989_A_G_b37	14_74278616_T_A_b37	Independent	5.68017	NaN	NaN	1.81263	1.64417	1.9811	0.769219	0.61725	0.921188	2.58185	NaN	NaN
ADPSBQ	ENSG00000119614.2	14_74574561_G_T_b37	14_74708185_C_T_b37	Independent	-3.97315	-17.3758	5.06531	-1.29115	-1.57085	-1.01145	-1.11716	-1.49004	-0.744275	-2.40831	NaN	NaN
ADPSBQ	ENSG00000258559.2	14_74747182_G_A_b37	14_74765893_C_A_b37	Independent	5.68698	NaN	NaN	0.281864	0.187534	0.376194	-0.579177	-0.899126	-0.259227	-0.297313	NaN	NaN
ADPSBQ	ENSG00000259114.1	14_74826582_C_T_b37	14_74426854_T_C_b37	Independent	3.95136	NaN	NaN	-0.388176	-0.572047	-0.204305	-0.779711	-1.21373	-0.345689	-1.16789	NaN	NaN
ADPSBQ	ENSG00000259005.1	14_74934597_C_G_b37	14_74950637_C_T_b37	Independent	5.68017	NaN	NaN	0.656658	0.439377	0.873939	0.685874	0.442064	0.929685	1.34253	NaN	NaN
ADPSBQ	ENSG00000270000.1	14_74951808_G_A_b37	14_74942232_T_C_b37	Independent	5.67675	NaN	NaN	0.74025	0.507143	0.973357	1.28464	1.04747	1.52181	2.02489	NaN	NaN
ADPSBQ	ENSG00000246548.3	14_77540419_A_T_b37	14_77468767_C_T_b37	Independent	5.6186	NaN	NaN	-1.61191	-2.21048	-1.01334	-0.49095	-0.701318	-0.280583	-2.10286	NaN	NaN
ADPSBQ	ENSG00000133962.3	14_92226474_G_T_b37	14_92243978_T_A_b37	Independent	5.67332	NaN	NaN	0.857511	0.587284	1.12774	0.705222	0.373386	1.03706	1.56273	NaN	NaN
ADPSBQ	ENSG00000165929.8	14_92309325_A_G_b37	14_92290983_G_T_b37	Independent	5.69373	NaN	NaN	-0.937798	-1.04677	-0.828826	-1.43609	-2.30097	-0.57121	-2.37389	NaN	NaN
ADPSBQ	ENSG00000258572.1	14_95981704_G_A_b37	14_95983975_G_A_b37	Independent	5.62762	NaN	NaN	-1.0279	-1.181	-0.874804	0.822876	0.463252	1.1825	-0.205028	NaN	NaN
ADPSBQ	ENSG00000183060.11	15_100273607_G_C_b37	15_100269737_G_A_b37	Independent	5.38521	NaN	NaN	-0.301208	-0.38991	-0.212507	0.331031	0.198271	0.463792	0.0298229	NaN	NaN
ADPSBQ	ENSG00000140470.9	15_100887549_G_A_b37	15_100591992_A_T_b37	Independent	3.51538	NaN	NaN	-0.455565	-0.636497	-0.274633	-0.608104	-0.896512	-0.319696	-1.06367	NaN	NaN
ADPSBQ	ENSG00000270127.1	15_101136663_T_C_b37	15_101114640_T_C_b37	Independent	5.68698	NaN	NaN	-2.60808	-2.76955	-2.44661	0.794696	0.527476	1.06192	-1.81339	NaN	NaN
ADPSBQ	ENSG00000154237.8	15_101610336_T_C_b37	15_101610294_T_C_b37	Independent	5.69373	NaN	NaN	-1.35471	-1.62174	-1.08769	0.208719	0.142874	0.274563	-1.14599	NaN	NaN
ADPSBQ	ENSG00000259658.3	15_102272092_T_G_b37	15_101862163_T_C_b37	Independent	5.37515	NaN	NaN	-0.378089	-0.485514	-0.270665	-0.21279	-0.320037	-0.105543	-0.590879	NaN	NaN
ADPSBQ	ENSG00000185596.12	15_102366849_G_A_b37	15_101788773_G_C_b37	Independent	5.18261	NaN	NaN	-0.296216	-0.38792	-0.204512	0.248023	0.148737	0.347309	-0.0481931	NaN	NaN
ADPSBQ	ENSG00000166664.9	15_30943789_T_C_b37	15_30966957_G_A_b37	Independent	5.66643	NaN	NaN	1.43184	1.12227	1.74141	1.13238	0.863692	1.40107	2.56422	NaN	NaN
ADPSBQ	ENSG00000215302.4	15_31022319_A_G_b37	15_31705913_C_T_b37	Independent	4.67085	NaN	NaN	-1.3343	-1.69893	-0.969677	-0.482019	-0.608099	-0.355939	-1.81632	NaN	NaN
ADPSBQ	ENSG00000270055.1	15_31682346_C_T_b37	15_30952496_A_G_b37	Independent	4.12349	NaN	NaN	-1.25114	-1.57218	-0.930106	-1.36993	-1.96269	-0.777168	-2.62107	NaN	NaN
ADPSBQ	ENSG00000232653.4	15_32096504_C_T_b37	15_32921352_T_C_b37	Independent	5.46338	NaN	NaN	-0.761201	-0.940649	-0.581754	-0.825493	-1.24683	-0.40416	-1.58669	NaN	NaN
ADPSBQ	ENSG00000259448.2	15_32271581_C_T_b37	15_31507680_C_G_b37	Independent	5.14456	NaN	NaN	0.854224	0.580199	1.12825	0.664394	0.196667	1.13212	1.51862	NaN	NaN
ADPSBQ	ENSG00000198826.6	15_32912511_C_A_b37	15_32916166_C_G_b37	Independent	4.1411	NaN	NaN	-0.741454	-1.85961	0.376701	-0.455123	-0.882357	-0.0278881	-1.19658	NaN	NaN
ADPSBQ	ENSG00000206127.6	15_32920064_G_A_b37	15_32943439_C_T_b37	Independent	5.2925	NaN	NaN	1.41371	1.13832	1.68909	1.81438	1.30607	2.32269	3.22808	NaN	NaN
ADPSBQ	ENSG00000215252.7	15_34909859_G_A_b37	15_34767498_C_T_b37	Independent	5.56038	NaN	NaN	-5.15661	-14.4264	4.11322	-0.35709	-0.500269	-0.21391	-5.5137	NaN	NaN
ADPSBQ	ENSG00000140319.6	15_40321351_C_A_b37	15_40329033_A_G_b37	Independent	5.65533	NaN	NaN	-0.315258	-0.381271	-0.249244	-0.0867242	-0.120912	-0.0525359	-0.401982	NaN	NaN
ADPSBQ	ENSG00000128829.7	15_40328292_A_G_b37	15_40353416_T_C_b37	Independent	-4.3932	-22.7466	3.58738	0.275011	0.22645	0.323572	0.114566	0.0644133	0.164719	0.389577	NaN	NaN
ADPSBQ	ENSG00000137841.7	15_40597229_G_A_b37	15_40581933_A_G_b37	Independent	5.65249	NaN	NaN	-0.374589	-0.46986	-0.279318	-0.448627	-0.709508	-0.187745	-0.823216	NaN	NaN
ADPSBQ	ENSG00000188549.8	15_40633220_ACT_A_b37	15_39701603_T_G_b37	Independent	4.67783	NaN	NaN	-0.385563	-0.811945	0.0408187	0.231404	0.0194561	0.443351	-0.15416	NaN	NaN
ADPSBQ	ENSG00000140323.4	15_40648610_C_T_b37	15_40705417_G_A_b37	Independent	-10.941	-64.9829	5.69373	2.5217	2.28585	2.75755	1.37924	1.11558	1.6429	3.90094	NaN	NaN
ADPSBQ	ENSG00000128928.4	15_40654067_T_A_b37	15_40669531_AT_A_b37	Independent	5.6204	NaN	NaN	0.200451	0.140895	0.260007	-0.561518	-0.695822	-0.427215	-0.361067	NaN	NaN
ADPSBQ	ENSG00000128891.11	15_40845952_A_G_b37	15_40922168_C_CT_b37	Independent	5.65099	NaN	NaN	-0.398921	-0.472305	-0.325537	0.268712	0.197132	0.340291	-0.130209	NaN	NaN
ADPSBQ	ENSG00000243789.6	15_42073397_C_T_b37	15_42140414_G_A_b37	Independent	4.45096	NaN	NaN	-0.25015	-0.316775	-0.183525	0.140766	0.0785638	0.202967	-0.109385	NaN	NaN
ADPSBQ	ENSG00000166762.12	15_44027073_A_G_b37	15_44021501_G_C_b37	Independent	5.68698	NaN	NaN	-3.09881	-3.67517	-2.52246	2.62458	2.01331	3.23585	-0.474231	NaN	NaN
ADPSBQ	ENSG00000259479.2	15_45355184_A_T_b37	15_45365790_T_C_b37	Independent	1.0542	NaN	NaN	-3.27444	-7.90958	1.36069	0.285578	-0.129476	0.700633	-2.98886	NaN	NaN
ADPSBQ	ENSG00000140279.8	15_45394406_G_A_b37	15_45421662_C_A_b37	Independent	4.8639	NaN	NaN	-3.73217	-6.22954	-1.2348	-0.655719	-0.962822	-0.348616	-4.38789	NaN	NaN
ADPSBQ	ENSG00000259520.1	15_45531042_A_G_b37	15_45571386_G_A_b37	Independent	5.23789	NaN	NaN	2.12375	1.85226	2.39524	0.551759	0.305319	0.798199	2.67551	NaN	NaN
ADPSBQ	ENSG00000137857.13	15_45672350_A_G_b37	15_45421662_C_A_b37	Independent	5.62795	NaN	NaN	-6.64386	-70.4811	57.1934	-0.579795	-0.936491	-0.223098	-7.22365	NaN	NaN
ADPSBQ	ENSG00000259715.1	15_50665742_CCCT_C_b37	15_50649601_G_T_b37	Independent	0.771341	NaN	NaN	1.36561	1.2025	1.52872	-0.453001	-0.6864	-0.219602	0.91261	NaN	NaN
ADPSBQ	ENSG00000138600.5	15_51025659_A_C_b37	15_51000968_T_C_b37	Independent	5.69373	NaN	NaN	-0.259263	-0.328049	-0.190476	-0.151097	-0.211032	-0.0911607	-0.410359	NaN	NaN
ADPSBQ	ENSG00000186417.9	15_51559496_G_A_b37	15_51625078_C_T_b37	Independent	2.27095	NaN	NaN	0.69416	0.423272	0.965048	0.746515	0.3951	1.09793	1.44068	NaN	NaN
ADPSBQ	ENSG00000069869.11	15_56133199_A_T_b37	15_56241603_G_T_b37	Independent	3.52489	NaN	NaN	-0.132935	-0.186264	-0.079606	0.563844	0.349282	0.778406	0.430909	NaN	NaN
ADPSBQ	ENSG00000255529.3	15_58000981_C_T_b37	15_57988553_GGGCCGTCT_G_b37	Independent	5.31111	NaN	NaN	-0.157725	-0.208996	-0.106453	0.131412	0.0614222	0.201402	-0.0263122	NaN	NaN
ADPSBQ	ENSG00000241839.5	15_65171040_G_A_b37	15_64479402_T_G_b37	Independent	5.53504	NaN	NaN	-0.28874	-0.384921	-0.192559	0.210779	0.105247	0.316311	-0.0779613	NaN	NaN
ADPSBQ	ENSG00000090487.6	15_65264990_G_A_b37	15_65284788_C_T_b37	Independent	5.68698	NaN	NaN	0.339829	0.297943	0.381714	0.398891	0.260488	0.537295	0.73872	NaN	NaN
ADPSBQ	ENSG00000166839.12	15_65281624_A_G_b37	15_65315211_A_AT_b37	Independent	0.591543	NaN	NaN	-0.602393	-0.785037	-0.419748	0.373871	0.192409	0.555333	-0.228522	NaN	NaN
ADPSBQ	ENSG00000166938.8	15_66575989_C_A_b37	15_66843716_G_C_b37	Independent	5.67675	NaN	NaN	-0.329851	-0.421234	-0.238467	-0.120753	-0.171899	-0.0696069	-0.450604	NaN	NaN
ADPSBQ	ENSG00000174446.8	15_66710276_C_T_b37	15_66786706_TGAG_T_b37	Independent	5.68358	NaN	NaN	-0.723107	-0.840639	-0.605574	-0.289047	-0.381817	-0.196277	-1.01215	NaN	NaN
ADPSBQ	ENSG00000174442.7	15_67121039_G_A_b37	15_66666909_TG_T_b37	Independent	5.66643	NaN	NaN	0.442186	0.232631	0.65174	0.223646	0.110228	0.337063	0.665831	NaN	NaN
ADPSBQ	ENSG00000033800.9	15_68247165_A_G_b37	15_68238462_T_C_b37	Independent	5.60901	NaN	NaN	0.487967	0.392222	0.583712	-0.136794	-0.199118	-0.0744711	0.351173	NaN	NaN
ADPSBQ	ENSG00000137831.10	15_70962469_G_A_b37	15_71038162_CT_C_b37	Independent	5.66643	NaN	NaN	0.591378	0.319322	0.863434	-0.153104	-0.215339	-0.0908693	0.438274	NaN	NaN
ADPSBQ	ENSG00000159322.13	15_72974065_A_C_b37	15_73105419_G_A_b37	Independent	5.13086	NaN	NaN	0.239356	0.157255	0.321457	0.21729	0.0915818	0.342998	0.456646	NaN	NaN
ADPSBQ	ENSG00000166233.8	15_72974065_A_C_b37	15_72918463_A_C_b37	Independent	4.61758	NaN	NaN	-0.0833622	-0.152898	-0.0138265	0.173055	0.105715	0.240394	0.0896925	NaN	NaN
ADPSBQ	ENSG00000140465.9	15_74045195_G_A_b37	15_75449828_T_C_b37	Independent	1.12166	NaN	NaN	1.08348	-0.0207015	2.18765	1.63156	-1.56437	4.82749	2.71504	NaN	NaN
ADPSBQ	ENSG00000178718.5	15_74256872_C_T_b37	15_75266049_G_C_b37	Independent	5.67492	NaN	NaN	-0.443827	-0.535549	-0.352105	-0.268806	-0.400115	-0.137498	-0.712633	NaN	NaN
ADPSBQ	ENSG00000248540.2	15_75094881_C_T_b37	15_74482875_A_C_b37	Independent	4.26512	NaN	NaN	0.886053	0.626604	1.1455	1.48389	0.983024	1.98475	2.36994	NaN	NaN
ADPSBQ	ENSG00000140474.8	15_75096443_T_C_b37	15_75982581_G_C_b37	Independent	5.44084	NaN	NaN	-0.18232	-0.237642	-0.126999	-0.1147	-0.415608	0.186209	-0.29702	NaN	NaN
ADPSBQ	ENSG00000260274.1	15_75796823_A_G_b37	15_75814388_C_T_b37	Independent	5.42745	NaN	NaN	0.37707	0.269781	0.484359	0.17411	0.0809545	0.267265	0.55118	NaN	NaN
ADPSBQ	ENSG00000140367.7	15_76192429_A_G_b37	15_76264167_C_T_b37	Independent	5.68358	NaN	NaN	-0.277308	-0.358891	-0.195725	-0.10275	-0.153504	-0.0519955	-0.380057	NaN	NaN
ADPSBQ	ENSG00000140368.8	15_77329669_TTC_T_b37	15_76763360_CA_C_b37	Independent	5.53733	NaN	NaN	0.471154	0.285628	0.656681	0.962606	0.545412	1.3798	1.43376	NaN	NaN
ADPSBQ	ENSG00000260787.1	15_77335891_C_T_b37	15_77329669_TTC_T_b37	Independent	4.34894	NaN	NaN	0.914516	0.72281	1.10622	-0.711235	-1.02295	-0.399523	0.203282	NaN	NaN
ADPSBQ	ENSG00000260139.2	15_77517916_AGGT_A_b37	15_78525994_G_A_b37	Independent	4.47914	NaN	NaN	-0.714389	-1.03601	-0.392766	1.53379	1.01433	2.05326	0.819403	NaN	NaN
ADPSBQ	ENSG00000136425.8	15_78207704_T_C_b37	15_79256158_G_T_b37	Independent	5.43492	NaN	NaN	-0.401445	-0.582089	-0.2208	0.319011	0.139139	0.498882	-0.082434	NaN	NaN
ADPSBQ	ENSG00000260776.1	15_78234836_C_T_b37	15_78235765_C_T_b37	Independent	5.42495	NaN	NaN	1.28081	0.929611	1.632	0.788666	0.449038	1.12829	2.06947	NaN	NaN
ADPSBQ	ENSG00000103811.11	15_79231046_G_T_b37	15_79233792_AT_A_b37	Independent	5.66643	NaN	NaN	0.881291	0.744869	1.01771	-1.08503	-1.31683	-0.853235	-0.203742	NaN	NaN
ADPSBQ	ENSG00000136371.5	15_80115347_C_T_b37	15_80154982_C_T_b37	Independent	5.29251	NaN	NaN	-0.469916	-0.595807	-0.344025	0.259348	0.161367	0.357328	-0.210568	NaN	NaN
ADPSBQ	ENSG00000172349.12	15_81844771_T_TA_b37	15_81540011_T_A_b37	Independent	2.87354	NaN	NaN	0.41856	0.258403	0.578718	0.293073	0.152098	0.434049	0.711634	NaN	NaN
ADPSBQ	ENSG00000188659.5	15_82565049_A_G_b37	15_82518666_C_G_b37	Independent	5.69036	NaN	NaN	2.58012	2.33899	2.82124	-0.424558	-0.573506	-0.275609	2.15556	NaN	NaN
ADPSBQ	ENSG00000184779.8	15_83305550_A_G_b37	15_83714270_C_CA_b37	Independent	5.68698	NaN	NaN	0.245256	0.150388	0.340123	0.508293	0.18506	0.831525	0.753548	NaN	NaN
ADPSBQ	ENSG00000169609.9	15_83660298_T_A_b37	15_83733002_G_A_b37	Independent	5.66296	NaN	NaN	-0.550144	-0.748342	-0.351946	0.120643	0.0646295	0.176657	-0.4295	NaN	NaN
ADPSBQ	ENSG00000230373.4	15_84954730_T_C_b37	15_85070931_T_C_b37	Independent	5.52493	NaN	NaN	-0.859208	-0.962905	-0.755511	0.406205	0.253672	0.558738	-0.453003	NaN	NaN
ADPSBQ	ENSG00000259728.1	15_85092906_T_C_b37	15_84823902_A_G_b37	Independent	-1.55603	-14.7938	5.29956	0.499113	0.33623	0.661996	-0.572369	-0.741413	-0.403325	-0.0732566	NaN	NaN
ADPSBQ	ENSG00000189136.4	15_85096076_A_G_b37	15_84776046_T_C_b37	Independent	5.44285	NaN	NaN	0.350166	0.207032	0.493299	-0.305233	-0.464273	-0.146193	0.0449324	NaN	NaN
ADPSBQ	ENSG00000259570.1	15_85103124_T_G_b37	15_85052329_A_C_b37	Independent	5.10595	NaN	NaN	0.372056	0.0855676	0.658544	-0.877819	-2.02937	0.273734	-0.505763	NaN	NaN
ADPSBQ	ENSG00000177082.8	15_85198362_G_T_b37	15_84799399_A_G_b37	Independent	5.63029	NaN	NaN	0.199844	0.15318	0.246509	-0.127263	-0.19125	-0.0632754	0.0725816	NaN	NaN
ADPSBQ	ENSG00000244056.2	15_85479581_C_T_b37	15_84953964_A_G_b37	Independent	5.31674	NaN	NaN	0.565917	0.32548	0.806353	-0.473917	-0.708487	-0.239347	0.0919995	NaN	NaN
ADPSBQ	ENSG00000225151.6	15_85726737_C_A_b37	15_85113490_G_C_b37	Independent	-1.42726	-21.6582	5.43157	-0.781091	-0.997955	-0.564227	0.313008	0.16	0.466016	-0.468083	NaN	NaN
ADPSBQ	ENSG00000185043.6	15_90784053_A_T_b37	15_90776375_T_C_b37	Independent	5.44116	NaN	NaN	0.192562	0.138499	0.246624	-0.143436	-0.213737	-0.0731349	0.0491258	NaN	NaN
ADPSBQ	ENSG00000140575.8	15_90967711_A_T_b37	15_91037534_G_GTATT_b37	Independent	5.46346	NaN	NaN	0.322334	0.20097	0.443697	-0.195435	-0.328432	-0.0624385	0.126899	NaN	NaN
ADPSBQ	ENSG00000182253.10	15_99730813_C_A_b37	15_100500445_T_C_b37	Independent	-1.64905	-31.6042	5.07535	-0.786578	-0.928339	-0.644817	0.274277	0.109614	0.438939	-0.512301	NaN	NaN
ADPSBQ	ENSG00000103852.8	15_99776418_G_A_b37	15_99687411_T_C_b37	Independent	5.36507	NaN	NaN	-0.408112	-0.521256	-0.294969	-0.109756	-0.162078	-0.057433	-0.517868	NaN	NaN
ADPSBQ	ENSG00000183454.9	16_10246369_T_C_b37	16_10607451_G_C_b37	Independent	5.23518	NaN	NaN	0.821135	0.47365	1.16862	-2.36186	-5.31049	0.586778	-1.54072	NaN	NaN
ADPSBQ	ENSG00000166669.9	16_10528277_G_A_b37	16_10460244_C_T_b37	Independent	5.65262	NaN	NaN	0.489726	0.356171	0.623282	-0.665537	-0.89555	-0.435524	-0.175811	NaN	NaN
ADPSBQ	ENSG00000175643.7	16_11419018_C_T_b37	16_11439303_G_T_b37	Independent	5.39038	NaN	NaN	-0.685881	-0.860135	-0.511626	-0.444143	-0.639346	-0.248941	-1.13002	NaN	NaN
ADPSBQ	ENSG00000189067.8	16_11639707_G_A_b37	16_11642242_T_C_b37	Independent	5.66643	NaN	NaN	-0.422717	-0.498154	-0.347281	-0.489588	-0.749068	-0.230109	-0.912306	NaN	NaN
ADPSBQ	ENSG00000103381.7	16_13097755_G_T_b37	16_12911458_G_A_b37	Independent	5.37064	NaN	NaN	0.460546	0.247121	0.67397	0.137035	-0.0142419	0.288312	0.597581	NaN	NaN
ADPSBQ	ENSG00000254852.4	16_15235029_C_A_b37	16_15144436_A_C_b37	Independent	5.68358	NaN	NaN	1.48321	1.24312	1.72329	1.25586	0.799029	1.71269	2.73907	NaN	NaN
ADPSBQ	ENSG00000183458.9	16_15235640_C_A_b37	16_15696369_G_A_b37	Independent	5.23114	NaN	NaN	-0.282932	-0.379249	-0.186615	-1.01175	-1.47032	-0.553187	-1.29468	NaN	NaN
ADPSBQ	ENSG00000188599.13	16_15236937_A_G_b37	16_14551835_A_C_b37	Independent	5.34295	NaN	NaN	-0.466298	-0.567418	-0.365178	0.310503	0.175848	0.445158	-0.155795	NaN	NaN
ADPSBQ	ENSG00000179889.14	16_15326086_A_G_b37	16_15117012_C_T_b37	Independent	5.17048	NaN	NaN	-0.285461	-0.48576	-0.0851612	0.161466	0.0361952	0.286736	-0.123995	NaN	NaN
ADPSBQ	ENSG00000100726.10	16_1557972_C_T_b37	16_1562195_A_G_b37	Independent	5.6058	NaN	NaN	-0.472653	-0.577118	-0.368189	-0.153003	-0.214614	-0.0913932	-0.625657	NaN	NaN
ADPSBQ	ENSG00000103226.13	16_16298942_C_T_b37	16_16296488_G_A_b37	Independent	5.26269	NaN	NaN	-0.60053	-0.742328	-0.458731	-0.719981	-1.18124	-0.258724	-1.32051	NaN	NaN
ADPSBQ	ENSG00000072864.8	16_16464593_C_T_b37	16_15810211_G_A_b37	Independent	5.60212	NaN	NaN	-0.155989	-0.222436	-0.089542	0.267476	0.010595	0.524357	0.111487	NaN	NaN
ADPSBQ	ENSG00000227827.3	16_16656147_A_G_b37	16_16633124_C_T_b37	Independent	2.91588	NaN	NaN	2.09317	1.62996	2.55638	1.93276	1.42579	2.43974	4.02594	NaN	NaN
ADPSBQ	ENSG00000233024.3	16_18551586_C_T_b37	16_18970155_A_T_b37	Independent	5.13684	NaN	NaN	0.585803	0.402588	0.769019	0.515402	0.308054	0.722751	1.10121	NaN	NaN
ADPSBQ	ENSG00000103544.10	16_19517616_A_AC_b37	16_19670009_G_T_b37	Independent	5.67675	NaN	NaN	-0.124619	-0.168307	-0.0809304	-0.138023	-0.202914	-0.0731314	-0.262642	NaN	NaN
ADPSBQ	ENSG00000185864.12	16_21604030_G_A_b37	16_22667684_G_C_b37	Independent	5.59471	NaN	NaN	1.62378	0.626686	2.62087	0.474193	0.261001	0.687385	2.09797	NaN	NaN
ADPSBQ	ENSG00000260306.1	16_21806883_C_G_b37	16_22407468_TTTTC_T_b37	Independent	2.84518	NaN	NaN	-0.913184	-1.16007	-0.6663	-0.132112	-0.588099	0.323875	-1.0453	NaN	NaN
ADPSBQ	ENSG00000262700.1	16_25091410_G_A_b37	16_25038331_CTCTT_C_b37	Independent	4.931	NaN	NaN	0.686412	0.470637	0.902187	0.450945	0.236268	0.665622	1.13736	NaN	NaN
ADPSBQ	ENSG00000269937.1	16_2611554_C_T_b37	16_2699442_G_GTC_b37	Independent	5.38907	NaN	NaN	0.905255	0.57002	1.24049	-2.50952	-9.78033	4.76129	-1.60426	NaN	NaN
ADPSBQ	ENSG00000261613.2	16_2716435_A_G_b37	16_2713728_C_T_b37	Independent	2.45478	NaN	NaN	1.74083	1.48043	2.00124	1.2748	0.999261	1.55034	3.01563	NaN	NaN
ADPSBQ	ENSG00000178952.4	16_28183866_C_T_b37	16_28857645_A_G_b37	Independent	5.65599	NaN	NaN	0.137806	0.102697	0.172914	0.435074	0.300303	0.569844	0.572879	NaN	NaN
ADPSBQ	ENSG00000251417.1	16_28871191_C_G_b37	16_28705687_G_GA_b37	Independent	4.82582	NaN	NaN	-0.787383	-0.979343	-0.595423	0.481193	0.256983	0.705402	-0.30619	NaN	NaN
ADPSBQ	ENSG00000259982.1	16_28904733_CAAAAAG_C_b37	16_28689231_A_G_b37	Independent	4.96566	NaN	NaN	-0.947155	-1.21424	-0.680074	-0.338221	-0.663488	-0.012954	-1.28538	NaN	NaN
ADPSBQ	ENSG00000103472.5	16_29132962_A_G_b37	16_28330973_A_AC_b37	Independent	4.54359	NaN	NaN	-0.315509	-0.404885	-0.226133	0.210692	0.111383	0.31	-0.104817	NaN	NaN
ADPSBQ	ENSG00000183604.10	16_29639487_C_T_b37	16_30324494_C_T_b37	Independent	5.17625	NaN	NaN	-0.383988	-0.487776	-0.2802	-0.204093	-0.309471	-0.0987145	-0.588081	NaN	NaN
ADPSBQ	ENSG00000149922.6	16_30103160_C_A_b37	16_30091251_C_T_b37	Independent	5.69036	NaN	NaN	-0.483882	-0.613711	-0.354054	0.87513	0.517509	1.23275	0.391248	NaN	NaN
ADPSBQ	ENSG00000102886.10	16_30382313_G_T_b37	16_30102802_T_C_b37	Independent	5.54126	NaN	NaN	0.211481	0.10837	0.314592	0.482264	-0.110874	1.0754	0.693746	NaN	NaN
ADPSBQ	ENSG00000008516.12	16_3105807_G_A_b37	16_3301664_T_C_b37	Independent	5.65948	NaN	NaN	1.49065	0.924322	2.05698	1.50748	0.861816	2.15314	2.99813	NaN	NaN
ADPSBQ	ENSG00000103510.15	16_31126321_C_A_b37	16_31149142_A_G_b37	Independent	5.39971	NaN	NaN	0.132549	0.0937976	0.1713	0.102085	0.0623485	0.141822	0.234634	NaN	NaN
ADPSBQ	ENSG00000008517.12	16_3161691_G_C_b37	16_3111193_T_C_b37	Independent	1.5253	NaN	NaN	-1.03399	-1.30866	-0.759313	-0.40956	-0.573351	-0.245769	-1.44355	NaN	NaN
ADPSBQ	ENSG00000263072.1	16_3174930_G_C_b37	16_3042315_T_C_b37	Independent	5.66616	NaN	NaN	0.326493	0.259698	0.393289	0.607973	0.381218	0.834728	0.934466	NaN	NaN
ADPSBQ	ENSG00000131797.8	16_31848129_G_A_b37	16_31708439_C_T_b37	Independent	5.37225	NaN	NaN	-0.291804	-0.416546	-0.167061	-0.447344	-0.659396	-0.235293	-0.739148	NaN	NaN
ADPSBQ	ENSG00000230267.3	16_32385012_C_T_b37	16_32014215_T_G_b37	Independent	1.93091	NaN	NaN	0.766943	-0.154933	1.68882	-1.29461	-2.69098	0.101773	-0.527663	NaN	NaN
ADPSBQ	ENSG00000167984.12	16_3618426_A_T_b37	16_3589024_AC_A_b37	Independent	5.67675	NaN	NaN	-0.802164	-0.982471	-0.621856	0.411447	0.234851	0.588044	-0.390716	NaN	NaN
ADPSBQ	ENSG00000153406.9	16_4549226_C_G_b37	16_4316280_T_A_b37	Independent	5.02006	NaN	NaN	-0.412549	-0.473278	-0.35182	0.356884	0.181813	0.531955	-0.0556648	NaN	NaN
ADPSBQ	ENSG00000242612.2	16_455497_G_C_b37	16_462881_A_T_b37	Independent	5.24631	NaN	NaN	0.376684	0.294381	0.458987	0.298494	0.170606	0.426382	0.675178	NaN	NaN
ADPSBQ	ENSG00000103199.9	16_4816102_T_C_b37	16_4812209_G_A_b37	Independent	4.13696	NaN	NaN	-0.312983	-0.367434	-0.258531	0.160195	0.102018	0.218371	-0.152788	NaN	NaN
ADPSBQ	ENSG00000102910.9	16_48445318_T_TGA_b37	16_48390512_G_T_b37	Independent	4.57214	NaN	NaN	0.170416	0.128305	0.212528	-0.159146	-0.22354	-0.0947521	0.0112705	NaN	NaN
ADPSBQ	ENSG00000103174.7	16_5069355_T_C_b37	16_5606374_G_C_b37	Independent	3.95774	NaN	NaN	-0.134941	-0.188926	-0.0809555	0.172909	0.112397	0.233421	0.0379684	NaN	NaN
ADPSBQ	ENSG00000125124.7	16_56506126_C_A_b37	16_56491662_A_G_b37	Independent	5.66988	NaN	NaN	-0.478326	-0.549861	-0.406791	-0.149798	-0.2057	-0.0938964	-0.628124	NaN	NaN
ADPSBQ	ENSG00000169715.10	16_57069153_T_C_b37	16_56659525_C_G_b37	Independent	5.57609	NaN	NaN	-0.522399	-0.734967	-0.309832	0.437505	0.215894	0.659115	-0.0848945	NaN	NaN
ADPSBQ	ENSG00000157322.12	16_69974448_C_A_b37	16_69973127_A_G_b37	Independent	5.23251	NaN	NaN	-1.43424	-1.70509	-1.1634	-0.816062	-1.01831	-0.613818	-2.2503	NaN	NaN
ADPSBQ	ENSG00000226232.4	16_69982412_G_A_b37	16_70104789_G_C_b37	Independent	5.57595	NaN	NaN	-0.660494	-0.742014	-0.578974	-0.740117	-0.996166	-0.484068	-1.40061	NaN	NaN
ADPSBQ	ENSG00000255185.1	16_70035580_G_A_b37	16_69964374_G_A_b37	Independent	5.13943	NaN	NaN	-0.569896	-0.701839	-0.437952	0.366	0.24089	0.49111	-0.203895	NaN	NaN
ADPSBQ	ENSG00000161996.13	16_707034_A_C_b37	16_707748_C_T_b37	Independent	5.61678	NaN	NaN	0.36052	0.287148	0.433892	-0.178802	-0.250384	-0.10722	0.181718	NaN	NaN
ADPSBQ	ENSG00000157368.6	16_71082361_G_C_b37	16_70535962_G_A_b37	Independent	4.80064	NaN	NaN	0.675126	0.343933	1.00632	0.299586	0.0262429	0.572929	0.974712	NaN	NaN
ADPSBQ	ENSG00000167377.13	16_71491264_A_G_b37	16_71467628_T_C_b37	Independent	3.15224	NaN	NaN	0.437821	0.306108	0.569533	0.236892	0.136774	0.337009	0.674712	NaN	NaN
ADPSBQ	ENSG00000182149.16	16_71501869_G_GT_b37	16_71184750_A_G_b37	Independent	4.87305	NaN	NaN	-0.189201	-0.302219	-0.076183	-0.0470329	-0.0983292	0.00426332	-0.236234	NaN	NaN
ADPSBQ	ENSG00000130731.11	16_716798_C_T_b37	16_686337_G_A_b37	Independent	-5.18177	-33.7181	5.51343	0.332233	0.200998	0.463469	0.315641	0.170383	0.460899	0.647874	NaN	NaN
ADPSBQ	ENSG00000140832.5	16_71866460_G_A_b37	16_71686054_A_G_b37	Independent	4.88397	NaN	NaN	0.717923	0.51928	0.916565	-0.372795	-0.604578	-0.141012	0.345128	NaN	NaN
ADPSBQ	ENSG00000102967.7	16_71987299_A_AAGAGGTTTAATTGACTCAC_b37	16_72036577_A_G_b37	Independent	5.10997	NaN	NaN	-0.309998	-0.376601	-0.243395	-0.176579	-0.250459	-0.1027	-0.486578	NaN	NaN
ADPSBQ	ENSG00000261701.2	16_72078907_G_A_b37	16_72105084_C_T_b37	Independent	5.69373	NaN	NaN	6.02853	5.3318	6.72526	-5.03564	-5.78358	-4.2877	0.992884	NaN	NaN
ADPSBQ	ENSG00000214331.4	16_74377996_G_A_b37	16_74311453_G_A_b37	Independent	5.4848	NaN	NaN	-0.440237	-0.597261	-0.283213	0.157885	0.0723852	0.243385	-0.282352	NaN	NaN
ADPSBQ	ENSG00000184517.7	16_75200087_A_C_b37	16_75181579_G_C_b37	Independent	5.66643	NaN	NaN	0.35961	0.293991	0.42523	-0.559818	-0.658947	-0.460689	-0.200208	NaN	NaN
ADPSBQ	ENSG00000065457.6	16_75640362_T_C_b37	16_75776749_T_A_b37	Independent	5.2288	NaN	NaN	0.59439	0.535648	0.653132	-0.219963	-0.301702	-0.138224	0.374427	NaN	NaN
ADPSBQ	ENSG00000127580.11	16_757459_A_C_b37	16_589359_G_A_b37	Independent	5.50939	NaN	NaN	0.190451	0.135576	0.245327	0.220902	0.0661183	0.375686	0.411353	NaN	NaN
ADPSBQ	ENSG00000205078.5	16_77244795_G_T_b37	16_77233338_C_T_b37	Independent	4.61506	NaN	NaN	1.05193	0.847545	1.25631	-0.65295	-0.87051	-0.43539	0.398978	NaN	NaN
ADPSBQ	ENSG00000103111.10	16_77245971_G_A_b37	16_77233338_C_T_b37	Independent	3.92018	NaN	NaN	0.134122	0.0881993	0.180045	-0.13443	-0.195033	-0.0738262	-0.00030756	NaN	NaN
ADPSBQ	ENSG00000186153.12	16_78153071_G_A_b37	16_78306219_A_G_b37	Independent	5.66211	NaN	NaN	0.342179	0.261329	0.423029	-0.246778	-0.342762	-0.150795	0.0954002	NaN	NaN
ADPSBQ	ENSG00000260816.1	16_78272546_C_T_b37	16_78011559_C_T_b37	Independent	1.23005	NaN	NaN	1.34416	0.955661	1.73266	-0.629621	-0.945105	-0.314138	0.714537	NaN	NaN
ADPSBQ	ENSG00000166446.10	16_80934495_A_C_b37	16_80831541_G_C_b37	Independent	5.16679	NaN	NaN	0.385221	0.226276	0.544165	-0.249123	-0.384542	-0.113704	0.136098	NaN	NaN
ADPSBQ	ENSG00000166473.12	16_81202435_A_G_b37	16_81234586_G_C_b37	Independent	4.04358	NaN	NaN	0.95787	0.726573	1.18917	-0.759436	-1.04267	-0.476206	0.198434	NaN	NaN
ADPSBQ	ENSG00000103168.12	16_84213965_G_A_b37	16_84218565_T_C_b37	Independent	3.85369	NaN	NaN	-0.355745	-0.426556	-0.284934	-0.475603	-0.584186	-0.36702	-0.831348	NaN	NaN
ADPSBQ	ENSG00000153786.8	16_85051818_A_G_b37	16_85002012_G_A_b37	Independent	5.64975	NaN	NaN	0.146601	0.0954334	0.197768	0.120739	0.0693362	0.172142	0.26734	NaN	NaN
ADPSBQ	ENSG00000103248.13	16_86566115_T_C_b37	16_86560945_C_A_b37	Independent	5.69373	NaN	NaN	-0.668148	-0.805668	-0.530628	0.129891	0.0722904	0.187491	-0.538257	NaN	NaN
ADPSBQ	ENSG00000270020.1	16_86566115_T_C_b37	16_86561913_A_G_b37	Independent	5.69036	NaN	NaN	1.84535	1.51659	2.17411	-0.842308	-1.06036	-0.624251	1.00304	NaN	NaN
ADPSBQ	ENSG00000141012.8	16_88906535_G_A_b37	16_88899858_T_TC_b37	Independent	5.60947	NaN	NaN	0.637898	0.412505	0.863292	-0.213606	-0.289441	-0.137772	0.424292	NaN	NaN
ADPSBQ	ENSG00000158717.6	16_89133337_T_C_b37	16_88767045_C_T_b37	Independent	1.68426	NaN	NaN	-0.271403	-0.341867	-0.200939	0.237644	0.0441041	0.431183	-0.033759	NaN	NaN
ADPSBQ	ENSG00000131165.10	16_89698793_C_T_b37	16_89932046_G_A_b37	Independent	5.67675	NaN	NaN	0.370857	0.253368	0.488345	0.152537	0.0898393	0.215235	0.523394	NaN	NaN
ADPSBQ	ENSG00000185324.17	16_89760652_C_T_b37	16_89708267_C_T_b37	Independent	5.69373	NaN	NaN	-0.87725	-0.991359	-0.763142	-0.243306	-0.291201	-0.195411	-1.12056	NaN	NaN
ADPSBQ	ENSG00000141013.10	16_90052185_TTA_T_b37	16_90106364_C_A_b37	Independent	5.65948	NaN	NaN	-0.207504	-0.268277	-0.146731	0.295042	0.186463	0.403622	0.0875379	NaN	NaN
ADPSBQ	ENSG00000003249.9	16_90100471_T_C_b37	16_90086433_C_G_b37	Independent	5.66988	NaN	NaN	1.13191	0.82743	1.43639	1.64006	1.19661	2.08352	2.77197	NaN	NaN
ADPSBQ	ENSG00000006744.14	17_12896553_C_T_b37	17_12564079_T_TTTTC_b37	Independent	5.24699	NaN	NaN	0.224256	0.17382	0.274691	0.107296	0.0504932	0.164099	0.331552	NaN	NaN
ADPSBQ	ENSG00000223510.2	17_13940609_T_C_b37	17_13946328_A_G_b37	Independent	5.67675	NaN	NaN	0.499296	0.357294	0.641297	0.376988	0.222583	0.531392	0.876283	NaN	NaN
ADPSBQ	ENSG00000179277.9	17_15790766_A_G_b37	17_15700992_T_C_b37	Independent	5.53438	NaN	NaN	-0.378373	-0.483014	-0.273732	-0.386913	-0.549032	-0.224795	-0.765286	NaN	NaN
ADPSBQ	ENSG00000108474.12	17_16054523_T_A_b37	17_16240104_C_G_b37	Independent	5.6204	NaN	NaN	0.161422	0.101142	0.221703	-0.497584	-0.803868	-0.1913	-0.336162	NaN	NaN
ADPSBQ	ENSG00000166582.5	17_16243298_C_CCTTTTTTTTTA_b37	17_16252164_TTGCAGG_T_b37	Independent	5.6204	NaN	NaN	0.315204	0.231859	0.398549	-0.89133	-1.44237	-0.34029	-0.576126	NaN	NaN
ADPSBQ	ENSG00000133027.13	17_16811714_A_C_b37	17_17448691_A_G_b37	Independent	5.63504	NaN	NaN	-0.694622	-0.84263	-0.546615	0.334309	0.158626	0.509992	-0.360314	NaN	NaN
ADPSBQ	ENSG00000213077.5	17_17567757_A_C_b37	17_18537660_T_G_b37	Independent	5.36704	NaN	NaN	2.5674	2.29036	2.84444	-0.764197	-1.27307	-0.255322	1.8032	NaN	NaN
ADPSBQ	ENSG00000220161.4	17_18537660_T_G_b37	17_18095056_G_T_b37	Independent	5.02742	NaN	NaN	-0.838315	-1.11535	-0.561285	1.16362	0.662687	1.66456	0.325309	NaN	NaN
ADPSBQ	ENSG00000233327.6	17_18537660_T_G_b37	17_19190933_C_T_b37	Independent	3.13771	NaN	NaN	2.72676	2.47287	2.98065	1.90487	0.937647	2.87208	4.63163	NaN	NaN
ADPSBQ	ENSG00000171928.9	17_18618498_A_G_b37	17_18680231_G_C_b37	Independent	4.78868	NaN	NaN	-0.412429	-0.462103	-0.362755	-0.111565	-0.169466	-0.0536638	-0.523994	NaN	NaN
ADPSBQ	ENSG00000141127.10	17_18782691_G_A_b37	17_18861977_C_T_b37	Independent	4.97586	NaN	NaN	0.258611	0.211694	0.305529	-0.431026	-0.611777	-0.250275	-0.172415	NaN	NaN
ADPSBQ	ENSG00000083290.15	17_19778279_C_T_b37	17_19777031_G_A_b37	Independent	5.57215	NaN	NaN	-0.240554	-0.318776	-0.162332	0.273789	0.150166	0.397413	0.0332354	NaN	NaN
ADPSBQ	ENSG00000263345.1	17_2275734_C_G_b37	17_2028928_A_G_b37	Independent	5.41083	NaN	NaN	-0.557833	-0.740025	-0.375641	0.230806	0.116584	0.345028	-0.327028	NaN	NaN
ADPSBQ	ENSG00000264469.1	17_25607721_C_G_b37	17_25636485_T_G_b37	Independent	5.68017	NaN	NaN	0.278139	0.166105	0.390174	0.883061	0.557834	1.20829	1.1612	NaN	NaN
ADPSBQ	ENSG00000006042.7	17_31285511_C_T_b37	17_31255616_G_A_b37	Independent	5.62762	NaN	NaN	-0.318749	-0.418336	-0.219163	0.309186	0.194692	0.423681	-0.00956299	NaN	NaN
ADPSBQ	ENSG00000005156.7	17_33382205_G_A_b37	17_33329648_G_A_b37	Independent	5.69036	NaN	NaN	-0.249813	-0.300146	-0.199481	0.29829	0.219419	0.377162	0.048477	NaN	NaN
ADPSBQ	ENSG00000166750.5	17_33570441_C_A_b37	17_33642848_C_A_b37	Independent	5.64225	NaN	NaN	0.453788	0.393817	0.513758	-0.340104	-0.537904	-0.142305	0.113683	NaN	NaN
ADPSBQ	ENSG00000267369.1	17_33864830_T_A_b37	17_33828033_C_T_b37	Independent	2.7046	NaN	NaN	0.720837	0.505021	0.936654	-0.467398	-0.706936	-0.227861	0.253439	NaN	NaN
ADPSBQ	ENSG00000167236.2	17_34310702_A_G_b37	17_34302176_G_A_b37	Independent	5.12317	NaN	NaN	2.10499	1.68754	2.52244	-0.664113	-0.941789	-0.386438	1.44088	NaN	NaN
ADPSBQ	ENSG00000267596.1	17_34328646_CAGGGCAG_C_b37	17_34327429_G_T_b37	Independent	5.68017	NaN	NaN	-1.39473	-1.71723	-1.07222	2.19273	1.66924	2.71622	0.798002	NaN	NaN
ADPSBQ	ENSG00000256515.3	17_34587955_GAA_G_b37	17_34819251_C_G_b37	Independent	4.48384	NaN	NaN	-0.545289	-0.957157	-0.13342	-0.402468	-0.746272	-0.0586647	-0.947757	NaN	NaN
ADPSBQ	ENSG00000040531.10	17_3564073_A_G_b37	17_3539148_G_C_b37	Independent	5.69036	NaN	NaN	-0.51747	-0.612387	-0.422552	0.213066	0.151623	0.274509	-0.304403	NaN	NaN
ADPSBQ	ENSG00000108264.12	17_35782402_G_A_b37	17_35766475_A_G_b37	Independent	5.59842	NaN	NaN	0.276301	0.231017	0.321586	0.322954	0.158042	0.487867	0.599256	NaN	NaN
ADPSBQ	ENSG00000260833.2	17_36603520_C_T_b37	17_36608677_C_T_b37	Independent	5.65982	NaN	NaN	-0.681598	-0.970445	-0.392752	-0.629349	-0.925212	-0.333487	-1.31095	NaN	NaN
ADPSBQ	ENSG00000131771.9	17_38103016_T_C_b37	17_37043679_G_C_b37	Independent	5.61231	NaN	NaN	-1.93305	-2.93424	-0.931862	0.509791	0.26844	0.751143	-1.42326	NaN	NaN
ADPSBQ	ENSG00000167914.6	17_38112608_C_T_b37	17_38127112_G_A_b37	Independent	0.472128	NaN	NaN	-3.1978	-3.5161	-2.8795	-1.16405	-1.44581	-0.882288	-4.36185	NaN	NaN
ADPSBQ	ENSG00000008838.13	17_38175426_C_T_b37	17_38179667_A_G_b37	Independent	5.69373	NaN	NaN	-0.204124	-0.259304	-0.148945	-0.108023	-0.166832	-0.049215	-0.312148	NaN	NaN
ADPSBQ	ENSG00000167920.4	17_39047448_T_C_b37	17_38993464_A_T_b37	Independent	1.26742	NaN	NaN	0.262054	0.178339	0.34577	-0.191677	-0.300549	-0.0828046	0.0703774	NaN	NaN
ADPSBQ	ENSG00000131737.5	17_39530058_A_G_b37	17_40114587_G_A_b37	Independent	-4.82408	-64.0123	3.23171	1.70871	1.27637	2.14104	0.926056	0.53888	1.31323	2.63476	NaN	NaN
ADPSBQ	ENSG00000037042.8	17_40812065_G_A_b37	17_40681407_C_A_b37	Independent	4.61553	NaN	NaN	0.19926	0.140937	0.257584	-0.143818	-0.207447	-0.0801881	0.0554427	NaN	NaN
ADPSBQ	ENSG00000214447.3	17_42884538_C_A_b37	17_42939189_A_G_b37	Independent	1.64429	NaN	NaN	-0.955872	-1.1642	-0.747541	-0.703924	-0.911668	-0.49618	-1.6598	NaN	NaN
ADPSBQ	ENSG00000172992.7	17_43129759_TATC_T_b37	17_43127708_G_A_b37	Independent	5.65948	NaN	NaN	-0.179845	-0.239785	-0.119904	0.209193	0.136144	0.282243	0.0293485	NaN	NaN
ADPSBQ	ENSG00000161714.7	17_43148166_C_T_b37	17_43202529_G_A_b37	Independent	5.38738	NaN	NaN	0.2916	0.181161	0.40204	-0.329732	-0.481192	-0.178271	-0.0381313	NaN	NaN
ADPSBQ	ENSG00000214401.4	17_44068492_A_G_b37	17_43698899_A_G_b37	Independent	5.68017	NaN	NaN	2.49662	2.35693	2.6363	0.745765	0.565079	0.926452	3.24238	NaN	NaN
ADPSBQ	ENSG00000120071.8	17_44108486_C_CTCT_b37	17_44121579_T_C_b37	Independent	5.59471	NaN	NaN	0.355129	0.30028	0.409978	0.196933	0.134746	0.259121	0.552062	NaN	NaN
ADPSBQ	ENSG00000266918.1	17_44121579_T_C_b37	17_44270293_G_T_b37	Independent	5.67332	NaN	NaN	1.18468	0.930231	1.43912	0.665982	0.383998	0.947966	1.85066	NaN	NaN
ADPSBQ	ENSG00000185829.11	17_44228169_C_T_b37	17_44852612_A_C_b37	Independent	5.69373	NaN	NaN	0.871966	0.696173	1.04776	0.889539	0.729894	1.04918	1.76151	NaN	NaN
ADPSBQ	ENSG00000260075.1	17_44662558_G_C_b37	17_44102682_C_CT_b37	Independent	0.671411	NaN	NaN	-0.740654	-0.886129	-0.595178	0.327953	0.181473	0.474433	-0.412701	NaN	NaN
ADPSBQ	ENSG00000108379.5	17_44808342_C_CA_b37	17_44908263_C_T_b37	Independent	4.60715	NaN	NaN	-0.815894	-1.02397	-0.607818	-0.442666	-0.663238	-0.222094	-1.25856	NaN	NaN
ADPSBQ	ENSG00000188176.7	17_4486373_C_T_b37	17_4491956_T_C_b37	Independent	5.65249	NaN	NaN	-1.48803	-1.72658	-1.24948	0.9724	0.626239	1.31856	-0.515629	NaN	NaN
ADPSBQ	ENSG00000179673.3	17_45056301_G_T_b37	17_45008935_A_G_b37	Independent	5.27475	NaN	NaN	1.46054	1.11841	1.80267	0.525359	0.275892	0.774825	1.9859	NaN	NaN
ADPSBQ	ENSG00000141295.9	17_45917605_T_C_b37	17_45915395_T_C_b37	Independent	5.65948	NaN	NaN	-0.680493	-0.79444	-0.566547	-0.938392	-1.29368	-0.583107	-1.61889	NaN	NaN
ADPSBQ	ENSG00000182853.7	17_4689313_G_C_b37	17_4673023_A_G_b37	Independent	1.32656	NaN	NaN	-1.1217	-1.54686	-0.69654	-0.583483	-0.782635	-0.384332	-1.70518	NaN	NaN
ADPSBQ	ENSG00000262165.1	17_4704678_G_A_b37	17_4696873_C_A_b37	Independent	5.38572	NaN	NaN	-2.42056	-3.14783	-1.69329	0.502316	0.262498	0.742134	-1.91824	NaN	NaN
ADPSBQ	ENSG00000159210.5	17_47502886_G_C_b37	17_47146515_G_A_b37	Independent	5.64881	NaN	NaN	0.106337	0.0650917	0.147582	-0.230216	-0.371066	-0.0893664	-0.123879	NaN	NaN
ADPSBQ	ENSG00000091640.3	17_4856376_A_G_b37	17_4849774_G_A_b37	Independent	4.54009	NaN	NaN	-0.330589	-0.403959	-0.257218	0.419999	0.343953	0.496045	0.0894102	NaN	NaN
ADPSBQ	ENSG00000006282.15	17_48625307_GGGGGAGGGGCCT_G_b37	17_48624523_A_C_b37	Independent	5.66988	NaN	NaN	-0.955843	-1.02896	-0.882731	-0.479389	-0.649501	-0.309278	-1.43523	NaN	NaN
ADPSBQ	ENSG00000273172.1	17_48684_G_A_b37	17_81921_G_A_b37	Independent	3.68044	NaN	NaN	0.977074	0.750219	1.20393	-0.880424	-1.26216	-0.498687	0.0966504	NaN	NaN
ADPSBQ	ENSG00000243678.7	17_49243859_G_A_b37	17_49351499_G_A_b37	Independent	1.89687	NaN	NaN	-0.649665	-0.79083	-0.5085	0.121269	0.081737	0.160802	-0.528396	NaN	NaN
ADPSBQ	ENSG00000161929.10	17_5125249_A_G_b37	17_5147045_G_A_b37	Independent	4.58688	NaN	NaN	-0.543025	-0.737284	-0.348765	0.880982	-0.267796	2.02976	0.337957	NaN	NaN
ADPSBQ	ENSG00000166260.6	17_52991636_G_A_b37	17_53033007_T_G_b37	Independent	-0.318031	-16.3322	5.51855	-0.317266	-0.365134	-0.269398	0.13459	0.0808574	0.188323	-0.182676	NaN	NaN
ADPSBQ	ENSG00000181031.11	17_56117_A_G_b37	17_66204_TGAGA_T_b37	Independent	1.07926	NaN	NaN	-0.808304	-0.916948	-0.699659	-0.235469	-0.34935	-0.121588	-1.04377	NaN	NaN
ADPSBQ	ENSG00000108395.9	17_57092725_G_C_b37	17_57173845_A_G_b37	Independent	5.17356	NaN	NaN	0.190392	0.12199	0.258794	-0.132808	-0.194182	-0.0714345	0.0575839	NaN	NaN
ADPSBQ	ENSG00000108592.12	17_61940595_G_T_b37	17_61760967_C_T_b37	Independent	5.68017	NaN	NaN	0.425294	0.387357	0.463232	-0.243852	-0.331074	-0.156631	0.181442	NaN	NaN
ADPSBQ	ENSG00000267023.1	17_66020272_A_G_b37	17_66081050_C_T_b37	Independent	5.64897	NaN	NaN	0.661266	0.479027	0.843504	-0.28321	-0.410431	-0.155989	0.378056	NaN	NaN
ADPSBQ	ENSG00000267731.1	17_66107523_A_T_b37	17_66176561_A_G_b37	Independent	5.65749	NaN	NaN	0.828037	0.658298	0.997777	-0.714438	-0.908612	-0.520264	0.113599	NaN	NaN
ADPSBQ	ENSG00000267653.1	17_66932676_A_G_b37	17_67476470_G_A_b37	Independent	3.499	NaN	NaN	-0.87725	-1.38812	-0.36638	1.36572	0.583978	2.14747	0.488473	NaN	NaN
ADPSBQ	ENSG00000181885.14	17_7166822_T_A_b37	17_7160524_A_C_b37	Independent	5.68358	NaN	NaN	-0.498874	-0.642006	-0.355742	-1.34907	-2.09272	-0.605427	-1.84795	NaN	NaN
ADPSBQ	ENSG00000231027.1	17_72557854_A_G_b37	17_73505256_G_T_b37	Independent	5.58706	NaN	NaN	0.773412	0.576797	0.970026	1.25486	0.825311	1.68442	2.02828	NaN	NaN
ADPSBQ	ENSG00000266714.2	17_73588058_G_T_b37	17_73583027_A_G_b37	Independent	-0.766717	-18.1317	4.06107	-0.360379	-0.441246	-0.279512	0.146653	0.0688746	0.224432	-0.213726	NaN	NaN
ADPSBQ	ENSG00000170175.6	17_7358861_T_C_b37	17_7373595_T_C_b37	Independent	1.53802	NaN	NaN	0.444946	0.359123	0.530769	0.24727	0.155038	0.339501	0.692216	NaN	NaN
ADPSBQ	ENSG00000261222.2	17_73592125_T_A_b37	17_72562205_A_G_b37	Independent	3.91326	NaN	NaN	1.21591	0.64567	1.78615	-0.612661	-0.886421	-0.338901	0.603247	NaN	NaN
ADPSBQ	ENSG00000141576.10	17_74239621_T_C_b37	17_74271552_G_A_b37	Independent	4.27118	NaN	NaN	-1.18929	-1.51805	-0.860542	0.425804	0.30365	0.547959	-0.763489	NaN	NaN
ADPSBQ	ENSG00000129646.9	17_74314829_T_C_b37	17_74298257_C_G_b37	Independent	5.66643	NaN	NaN	0.935079	0.705187	1.16497	-0.338858	-0.487794	-0.189923	0.596221	NaN	NaN
ADPSBQ	ENSG00000092929.7	17_74792771_G_C_b37	17_73842892_C_T_b37	Independent	3.78295	NaN	NaN	-0.551388	-0.833653	-0.269122	-0.270724	-0.409471	-0.131976	-0.822111	NaN	NaN
ADPSBQ	ENSG00000070731.5	17_74879209_A_G_b37	17_74577040_T_C_b37	Independent	5.64459	NaN	NaN	1.006	0.805742	1.20625	0.485528	0.286789	0.684267	1.49152	NaN	NaN
ADPSBQ	ENSG00000167889.8	17_74989543_G_A_b37	17_74900630_C_T_b37	Independent	4.58688	NaN	NaN	-0.614558	-0.865669	-0.363447	-0.872294	-1.32289	-0.4217	-1.48685	NaN	NaN
ADPSBQ	ENSG00000108947.4	17_7599859_G_A_b37	17_7620907_C_G_b37	Independent	5.61313	NaN	NaN	0.913601	0.705434	1.12177	-1.58649	-2.31272	-0.860263	-0.672892	NaN	NaN
ADPSBQ	ENSG00000141519.10	17_78012348_G_A_b37	17_78002406_C_A_b37	Independent	5.28901	NaN	NaN	0.708261	0.560653	0.855869	0.593883	0.377111	0.810655	1.30214	NaN	NaN
ADPSBQ	ENSG00000171298.8	17_78022072_T_C_b37	17_78076592_A_C_b37	Independent	3.28831	NaN	NaN	-0.355468	-0.421387	-0.289548	-0.174805	-0.238825	-0.110784	-0.530272	NaN	NaN
ADPSBQ	ENSG00000262580.1	17_78178916_C_T_b37	17_78181132_T_C_b37	Independent	5.67332	NaN	NaN	-1.06459	-1.17282	-0.956353	0.61559	0.429563	0.801616	-0.448998	NaN	NaN
ADPSBQ	ENSG00000173821.15	17_78251696_C_T_b37	17_78269801_T_C_b37	Independent	5.59099	NaN	NaN	0.27049	0.191382	0.349598	0.465805	0.274746	0.656864	0.736295	NaN	NaN
ADPSBQ	ENSG00000262877.3	17_79369165_C_T_b37	17_79371423_G_A_b37	Independent	5.16118	NaN	NaN	1.18246	0.965207	1.39971	-0.932699	-1.13426	-0.731137	0.249762	NaN	NaN
ADPSBQ	ENSG00000181396.8	17_80377690_T_G_b37	17_80349932_G_A_b37	Independent	4.86909	NaN	NaN	-0.169916	-0.222809	-0.117024	0.15564	0.104859	0.20642	-0.0142764	NaN	NaN
ADPSBQ	ENSG00000266236.1	17_80454770_C_T_b37	17_80093273_G_A_b37	Independent	5.57799	NaN	NaN	-0.363607	-0.501586	-0.225629	-1.39065	-2.482	-0.299307	-1.75426	NaN	NaN
ADPSBQ	ENSG00000141580.11	17_80605644_A_G_b37	17_80546929_G_A_b37	Independent	2.67219	NaN	NaN	-0.101297	-0.13366	-0.0689336	0.117046	0.0727946	0.161297	0.0157492	NaN	NaN
ADPSBQ	ENSG00000141560.10	17_80672758_C_T_b37	17_80679455_T_A_b37	Independent	4.28176	NaN	NaN	-0.559848	-0.60604	-0.513656	0.0670613	0.0266746	0.107448	-0.492787	NaN	NaN
ADPSBQ	ENSG00000262663.1	17_81049850_G_A_b37	17_80969815_G_A_b37	Independent	5.47646	NaN	NaN	0.748401	NaN	NaN	0	NaN	NaN	0.748401	NaN	NaN
ADPSBQ	ENSG00000109047.7	17_9814423_T_C_b37	17_9800361_G_A_b37	Independent	5.57005	NaN	NaN	-0.949489	-1.14066	-0.758315	-0.965976	-1.44611	-0.485838	-1.91546	NaN	NaN
ADPSBQ	ENSG00000236618.2	17_997593_C_G_b37	17_1403964_A_G_b37	Independent	5.34598	NaN	NaN	-0.487483	-0.698947	-0.276018	0.251157	0.15194	0.350374	-0.236325	NaN	NaN
ADPSBQ	ENSG00000134265.8	18_10555120_T_C_b37	18_10505584_G_A_b37	Independent	5.67442	NaN	NaN	-0.245619	-0.295791	-0.195447	-0.119498	-0.179512	-0.0594835	-0.365117	NaN	NaN
ADPSBQ	ENSG00000263006.2	18_113198_A_T_b37	18_161922_A_G_b37	Independent	4.905	NaN	NaN	0.740578	0.421904	1.05925	0.645781	0.00815549	1.28341	1.38636	NaN	NaN
ADPSBQ	ENSG00000141401.7	18_11939837_A_C_b37	18_11972308_G_C_b37	Independent	5.02116	NaN	NaN	0.482133	0.368373	0.595894	-0.510957	-0.718145	-0.303768	-0.0288232	NaN	NaN
ADPSBQ	ENSG00000085415.11	18_12957770_G_A_b37	18_12444378_A_T_b37	Independent	5.03548	NaN	NaN	-0.15917	-0.213377	-0.104962	0.179089	0.0961937	0.261985	0.0199197	NaN	NaN
ADPSBQ	ENSG00000264745.1	18_20599873_T_C_b37	18_21338276_C_T_b37	Independent	5.43286	NaN	NaN	0.413304	0.244299	0.582309	0.336953	0.149102	0.524804	0.750257	NaN	NaN
ADPSBQ	ENSG00000141458.8	18_21164994_G_C_b37	18_21593089_A_G_b37	Independent	5.65599	NaN	NaN	0.392038	0.340735	0.44334	0.366554	0.170689	0.562419	0.758592	NaN	NaN
ADPSBQ	ENSG00000101574.10	18_2530342_A_G_b37	18_2610978_G_A_b37	Independent	5.57663	NaN	NaN	-0.476712	-0.703556	-0.249867	-0.21137	-0.305735	-0.117006	-0.688082	NaN	NaN
ADPSBQ	ENSG00000264433.1	18_327829_G_T_b37	18_322109_A_G_b37	Independent	1.85632	NaN	NaN	0.58178	0.333454	0.830107	-0.583423	-0.764753	-0.402092	-0.0016423	NaN	NaN
ADPSBQ	ENSG00000260552.1	18_33764105_CTGAG_C_b37	18_33369380_T_C_b37	Independent	5.4912	NaN	NaN	0.398657	0.264955	0.532359	0.751146	0.422015	1.08028	1.1498	NaN	NaN
ADPSBQ	ENSG00000177337.3	18_3595788_T_TG_b37	18_3595284_G_A_b37	Independent	5.6204	NaN	NaN	-0.486946	-0.692277	-0.281615	-0.217466	-0.320624	-0.114308	-0.704412	NaN	NaN
ADPSBQ	ENSG00000141469.12	18_43329719_G_A_b37	18_43247784_C_T_b37	Independent	5.57852	NaN	NaN	1.54434	1.17569	1.91298	-0.645143	-0.932185	-0.358101	0.899193	NaN	NaN
ADPSBQ	ENSG00000177576.6	18_47013579_G_A_b37	18_47023696_T_G_b37	Independent	5.63121	NaN	NaN	-0.0991889	-0.137786	-0.0605916	0.245173	0.129164	0.361182	0.145984	NaN	NaN
ADPSBQ	ENSG00000101751.6	18_51830362_A_G_b37	18_51813966_T_A_b37	Independent	5.68698	NaN	NaN	-0.442694	-0.493534	-0.391855	-0.186216	-0.246887	-0.125545	-0.62891	NaN	NaN
ADPSBQ	ENSG00000134440.7	18_54807196_G_A_b37	18_55291365_G_C_b37	Independent	2.80607	NaN	NaN	-0.0927276	-0.169777	-0.0156784	0.0945328	0.0464308	0.142635	0.0018052	NaN	NaN
ADPSBQ	ENSG00000150636.11	18_66534812_G_T_b37	18_66429290_G_A_b37	Independent	5.61565	NaN	NaN	-0.37558	-0.511585	-0.239575	-0.355004	-0.510357	-0.19965	-0.730584	NaN	NaN
ADPSBQ	ENSG00000265579.1	18_71231385_C_G_b37	18_71125697_G_A_b37	Independent	4.93125	NaN	NaN	-1.92353	-2.72482	-1.12224	0.97281	0.628313	1.31731	-0.950718	NaN	NaN
ADPSBQ	ENSG00000166342.14	18_71231569_G_T_b37	18_71125697_G_A_b37	Independent	0.565497	NaN	NaN	-3.07101	-3.98194	-2.16008	0.971134	0.626189	1.31608	-2.09988	NaN	NaN
ADPSBQ	ENSG00000166573.4	18_75106565_T_C_b37	18_74961397_A_G_b37	Independent	2.01645	NaN	NaN	0.946842	0.68103	1.21265	-0.874614	-1.25772	-0.491513	0.0722274	NaN	NaN
ADPSBQ	ENSG00000131196.13	18_77156537_C_G_b37	18_77307429_G_C_b37	Independent	0.727708	NaN	NaN	-0.193637	-0.280852	-0.106421	0.161678	0.0794264	0.24393	-0.0319582	NaN	NaN
ADPSBQ	ENSG00000261126.3	18_77827563_G_A_b37	18_77832658_C_T_b37	Independent	5.6204	NaN	NaN	-0.708558	-0.843648	-0.573468	-0.522453	-0.660494	-0.384411	-1.23101	NaN	NaN
ADPSBQ	ENSG00000128791.7	18_9365590_G_A_b37	18_9364854_T_C_b37	Independent	4.53688	NaN	NaN	-0.668156	-0.789996	-0.546316	-0.13606	-0.202918	-0.0692025	-0.804217	NaN	NaN
ADPSBQ	ENSG00000105088.4	19_10061960_A_T_b37	19_10037007_T_A_b37	Independent	5.43051	NaN	NaN	1.06795	0.872117	1.26378	-3.22844	-8.12235	1.66546	-2.1605	NaN	NaN
ADPSBQ	ENSG00000116032.5	19_1009585_C_G_b37	19_1010910_T_C_b37	Independent	1.18453	NaN	NaN	-0.897823	-1.11783	-0.677818	0.476313	0.29633	0.656296	-0.42151	NaN	NaN
ADPSBQ	ENSG00000105364.9	19_10370490_T_A_b37	19_9548698_C_T_b37	Independent	5.3511	NaN	NaN	0.167449	0.103301	0.231596	0.10905	0.05458	0.16352	0.276499	NaN	NaN
ADPSBQ	ENSG00000079805.12	19_10507506_A_G_b37	19_10894377_TA_T_b37	Independent	4.86099	NaN	NaN	-0.0621456	-0.100918	-0.0233732	-0.201739	-0.321681	-0.0817979	-0.263885	NaN	NaN
ADPSBQ	ENSG00000129347.15	19_10670184_C_G_b37	19_10688785_C_T_b37	Independent	3.84466	NaN	NaN	0.232693	0.1861	0.279286	-0.402825	-0.464965	-0.340686	-0.170132	NaN	NaN
ADPSBQ	ENSG00000099817.7	19_1095030_C_T_b37	19_1088285_T_C_b37	Independent	4.06019	NaN	NaN	-0.178656	-0.240353	-0.11696	0.107743	0.0425493	0.172937	-0.0709133	NaN	NaN
ADPSBQ	ENSG00000037757.9	19_13867018_C_G_b37	19_13871858_C_T_b37	Independent	5.64191	NaN	NaN	-0.466794	-0.55188	-0.381708	0.685147	0.380552	0.989741	0.218353	NaN	NaN
ADPSBQ	ENSG00000160961.7	19_14800444_CCAAGCA_C_b37	19_14818484_C_A_b37	Independent	-11.3733	-60.1919	5.5835	0.182117	0.127077	0.237156	0.670392	0.495744	0.845041	0.852509	NaN	NaN
ADPSBQ	ENSG00000071564.10	19_1579972_G_C_b37	19_1788247_G_T_b37	Independent	5.58278	NaN	NaN	-0.413802	-0.621214	-0.20639	0.104316	0.0531539	0.155478	-0.309486	NaN	NaN
ADPSBQ	ENSG00000186204.10	19_15816449_T_TA_b37	19_15834650_C_T_b37	Independent	5.55683	NaN	NaN	0.676669	0.515973	0.837366	-1.36284	-2.0782	-0.64747	-0.686166	NaN	NaN
ADPSBQ	ENSG00000267594.5	19_15889126_C_G_b37	19_15884810_A_T_b37	Independent	-1.14247	-32.6527	4.56708	-4.07299	-4.46625	-3.67973	0.649961	0.304318	0.995604	-3.42303	NaN	NaN
ADPSBQ	ENSG00000171903.12	19_16052233_C_T_b37	19_16045749_G_A_b37	Independent	5.6383	NaN	NaN	-2.12258	-2.36489	-1.88027	-1.12696	-1.46026	-0.793666	-3.24955	NaN	NaN
ADPSBQ	ENSG00000099330.4	19_17331119_C_T_b37	19_17337555_C_A_b37	Independent	5.65249	NaN	NaN	-0.411955	-0.515824	-0.308086	0.243671	0.159139	0.328202	-0.168284	NaN	NaN
ADPSBQ	ENSG00000160117.10	19_17386107_A_AT_b37	19_17386006_A_G_b37	Independent	5.38972	NaN	NaN	0.460956	0.315494	0.606417	0.285111	0.163907	0.406315	0.746067	NaN	NaN
ADPSBQ	ENSG00000130300.4	19_17426130_A_G_b37	19_17473015_G_A_b37	Independent	0.874962	NaN	NaN	0.650513	0.487364	0.813662	-0.391805	-0.595781	-0.187829	0.258708	NaN	NaN
ADPSBQ	ENSG00000141971.8	19_17543113_G_A_b37	19_17552019_A_AG_b37	Independent	5.64306	NaN	NaN	0.187742	0.141088	0.234396	-0.151768	-0.204386	-0.0991512	0.0359736	NaN	NaN
ADPSBQ	ENSG00000171773.2	19_17569052_A_G_b37	19_17099980_G_A_b37	Independent	5.12737	NaN	NaN	0.557132	0.38226	0.732004	-0.334932	-0.503066	-0.166798	0.2222	NaN	NaN
ADPSBQ	ENSG00000179913.6	19_17902587_T_C_b37	19_17830767_T_C_b37	Independent	5.67483	NaN	NaN	-1.2831	-1.56525	-1.00094	0.718385	0.420768	1.016	-0.56471	NaN	NaN
ADPSBQ	ENSG00000105639.14	19_17913672_T_A_b37	19_17937104_G_T_b37	Independent	4.92735	NaN	NaN	-0.453693	-0.625818	-0.281568	-0.240885	-0.35501	-0.12676	-0.694577	NaN	NaN
ADPSBQ	ENSG00000130270.12	19_1811603_C_T_b37	19_1807018_A_G_b37	Independent	3.27633	NaN	NaN	0.533977	0.377051	0.690902	-0.593592	-0.807358	-0.379825	-0.0596148	NaN	NaN
ADPSBQ	ENSG00000105669.8	19_18270132_A_G_b37	19_19023853_T_C_b37	Independent	-0.0689347	-15.5845	5.67079	0.318301	0.210076	0.426526	0.0524184	0.0207954	0.0840414	0.370719	NaN	NaN
ADPSBQ	ENSG00000130518.12	19_18391084_CGGG_C_b37	19_18391171_C_T_b37	Independent	2.09194	NaN	NaN	0.661403	0.470582	0.852224	-1.07127	-1.24669	-0.895853	-0.409867	NaN	NaN
ADPSBQ	ENSG00000130517.9	19_18459377_A_G_b37	19_18453629_G_A_b37	Independent	5.64545	NaN	NaN	-0.488087	-0.569273	-0.406901	-0.162676	-0.243524	-0.081827	-0.650763	NaN	NaN
ADPSBQ	ENSG00000221983.3	19_18682495_A_C_b37	19_18680754_T_C_b37	Independent	5.65949	NaN	NaN	-0.118711	-0.151684	-0.0857382	0.214104	0.0813171	0.346891	0.095393	NaN	NaN
ADPSBQ	ENSG00000064547.9	19_19740729_C_G_b37	19_20055464_A_G_b37	Independent	1.3403	NaN	NaN	0.392691	0.280931	0.504451	-0.420173	-0.597639	-0.242707	-0.0274815	NaN	NaN
ADPSBQ	ENSG00000268081.1	19_21753089_A_C_b37	19_21724115_TATTA_T_b37	Independent	5.39497	NaN	NaN	-0.587022	-0.776756	-0.397288	-0.550911	-0.762568	-0.339254	-1.13793	NaN	NaN
ADPSBQ	ENSG00000268555.1	19_21762189_A_T_b37	19_21753089_A_C_b37	Independent	5.66988	NaN	NaN	-2.45047	-2.66724	-2.23371	-0.776726	-1.0021	-0.55135	-3.2272	NaN	NaN
ADPSBQ	ENSG00000160321.10	19_22287938_G_A_b37	19_21759440_C_T_b37	Independent	-0.518897	-21.0233	5.08293	-1.10643	-1.53343	-0.679421	-0.878326	-1.2218	-0.534854	-1.98475	NaN	NaN
ADPSBQ	ENSG00000141934.5	19_276245_T_C_b37	19_327998_G_T_b37	Independent	5.22483	NaN	NaN	-0.729054	-0.988733	-0.469374	-0.611112	-0.829011	-0.393214	-1.34017	NaN	NaN
ADPSBQ	ENSG00000261824.2	19_27991454_A_T_b37	19_28102052_T_C_b37	Independent	5.37757	NaN	NaN	0.303248	0.213526	0.39297	-0.166787	-0.253977	-0.0795977	0.136461	NaN	NaN
ADPSBQ	ENSG00000261770.1	19_28291514_C_CAG_b37	19_28336904_T_C_b37	Independent	5.26576	NaN	NaN	-1.91349	-2.05556	-1.77142	0.886197	0.711639	1.06076	-1.02729	NaN	NaN
ADPSBQ	ENSG00000105186.10	19_33079964_A_G_b37	19_33143605_G_A_b37	Independent	5.66643	NaN	NaN	0.381678	0.283998	0.479358	-0.0932153	-0.142916	-0.0435145	0.288463	NaN	NaN
ADPSBQ	ENSG00000021488.8	19_33346883_T_C_b37	19_33346433_A_G_b37	Independent	5.56834	NaN	NaN	1.18073	0.949468	1.41199	1.11764	0.756736	1.47853	2.29836	NaN	NaN
ADPSBQ	ENSG00000131944.5	19_33463247_G_T_b37	19_33463245_A_G_b37	Independent	5.68698	NaN	NaN	-0.536693	-0.686522	-0.386863	0.336229	0.244624	0.427834	-0.200464	NaN	NaN
ADPSBQ	ENSG00000124302.8	19_34008179_A_G_b37	19_34098989_A_G_b37	Independent	5.39724	NaN	NaN	1.98791	1.69582	2.28	1.04017	0.743948	1.3364	3.02808	NaN	NaN
ADPSBQ	ENSG00000197841.10	19_35225532_C_T_b37	19_35223754_C_T_b37	Independent	5.62402	NaN	NaN	-0.194225	-0.269781	-0.118669	0.158776	0.0877593	0.229793	-0.0354489	NaN	NaN
ADPSBQ	ENSG00000105699.12	19_35744916_A_G_b37	19_35780851_A_G_b37	Independent	5.68017	NaN	NaN	0.566065	0.441283	0.690847	-0.26846	-0.368221	-0.168699	0.297605	NaN	NaN
ADPSBQ	ENSG00000167595.10	19_36216043_A_G_b37	19_36261373_C_T_b37	Independent	5.62952	NaN	NaN	-0.288406	-0.391352	-0.185459	-0.16986	-0.238608	-0.101112	-0.458266	NaN	NaN
ADPSBQ	ENSG00000161265.10	19_36236909_G_C_b37	19_36220430_A_G_b37	Independent	5.69373	NaN	NaN	0.381885	0.309487	0.454282	-0.419064	-0.516258	-0.32187	-0.0371795	NaN	NaN
ADPSBQ	ENSG00000161281.6	19_36640769_T_C_b37	19_36564843_G_T_b37	Independent	5.44674	NaN	NaN	0.694998	0.445412	0.944583	0.30793	0.137345	0.478516	1.00293	NaN	NaN
ADPSBQ	ENSG00000232677.2	19_36753624_C_T_b37	19_36707950_T_A_b37	Independent	5.6204	NaN	NaN	0.490811	0.369039	0.612584	-0.293616	-0.419958	-0.167273	0.197196	NaN	NaN
ADPSBQ	ENSG00000233527.4	19_37063969_C_T_b37	19_37355818_C_T_b37	Independent	5.43315	NaN	NaN	0.383031	0.292043	0.474019	-0.715513	-1.12253	-0.308496	-0.332482	NaN	NaN
ADPSBQ	ENSG00000099338.18	19_38468683_T_C_b37	19_38881413_C_CCA_b37	Independent	5.69036	NaN	NaN	0.909554	0.683945	1.13516	0.607766	0.373273	0.842259	1.51732	NaN	NaN
ADPSBQ	ENSG00000161243.4	19_39528022_GTCCA_G_b37	19_39540302_A_G_b37	Independent	5.64545	NaN	NaN	0.709847	0.576561	0.843133	-0.44549	-0.620697	-0.270284	0.264357	NaN	NaN
ADPSBQ	ENSG00000197782.10	19_40591871_A_G_b37	19_40592040_GT_G_b37	Independent	5.29115	NaN	NaN	0.580373	0.438615	0.722131	0.245867	0.127367	0.364367	0.82624	NaN	NaN
ADPSBQ	ENSG00000188493.10	19_41291119_G_A_b37	19_41247114_A_G_b37	Independent	3.81097	NaN	NaN	-0.169774	-0.227862	-0.111686	-0.134142	-0.197311	-0.0709724	-0.303916	NaN	NaN
ADPSBQ	ENSG00000256612.3	19_41415087_G_A_b37	19_41414481_G_A_b37	Independent	5.63479	NaN	NaN	1.01692	0.797335	1.23651	-0.459062	-0.675314	-0.242809	0.557858	NaN	NaN
ADPSBQ	ENSG00000183186.6	19_419498_T_C_b37	19_419407_A_G_b37	Independent	5.69373	NaN	NaN	1.00807	0.748735	1.26741	-1.9575	-2.69464	-1.22035	-0.949427	NaN	NaN
ADPSBQ	ENSG00000270164.1	19_42033703_G_A_b37	19_42038433_A_C_b37	Independent	5.69036	NaN	NaN	-4.0286	-9.47872	1.42152	-0.481166	-0.688636	-0.273695	-4.50976	NaN	NaN
ADPSBQ	ENSG00000243137.3	19_43615141_A_G_b37	19_43695840_T_G_b37	Independent	4.34307	NaN	NaN	-2.4859	-2.83151	-2.14029	-0.87954	-1.42199	-0.337086	-3.36544	NaN	NaN
ADPSBQ	ENSG00000105755.3	19_44037370_C_G_b37	19_44014530_C_T_b37	Independent	5.68698	NaN	NaN	-0.315565	-0.397061	-0.23407	0.141564	0.0762998	0.206829	-0.174001	NaN	NaN
ADPSBQ	ENSG00000204920.6	19_44494374_AGAGT_A_b37	19_44488352_G_A_b37	Independent	4.21243	NaN	NaN	-1.39499	-1.6605	-1.12948	0.319802	0.218275	0.421328	-1.07519	NaN	NaN
ADPSBQ	ENSG00000230666.1	19_45120592_C_T_b37	19_45219011_G_A_b37	Independent	2.07586	NaN	NaN	-0.929414	-1.31572	-0.543105	-0.574257	-0.850172	-0.298343	-1.50367	NaN	NaN
ADPSBQ	ENSG00000125743.6	19_46201213_T_G_b37	19_46177961_C_T_b37	Independent	5.69373	NaN	NaN	-0.164264	-0.207238	-0.121291	-0.20034	-0.294518	-0.106162	-0.364605	NaN	NaN
ADPSBQ	ENSG00000011485.10	19_46801442_A_G_b37	19_46889726_AG_A_b37	Independent	4.52666	NaN	NaN	-0.209658	-0.263417	-0.155899	-0.151169	-0.220732	-0.0816065	-0.360827	NaN	NaN
ADPSBQ	ENSG00000182013.13	19_46974652_G_C_b37	19_46984095_T_C_b37	Independent	-0.833507	-13.9569	5.59333	2.76616	2.56294	2.96939	-0.488289	-0.705543	-0.271034	2.27787	NaN	NaN
ADPSBQ	ENSG00000105287.8	19_47180307_G_T_b37	19_47211592_T_C_b37	Independent	5.36129	NaN	NaN	-0.0979017	-0.168057	-0.0277463	0.387248	0.151544	0.622951	0.289346	NaN	NaN
ADPSBQ	ENSG00000105281.8	19_47288150_C_A_b37	19_47333204_G_A_b37	Independent	5.29826	NaN	NaN	-0.229555	-0.315174	-0.143936	-0.237124	-0.328056	-0.146192	-0.466679	NaN	NaN
ADPSBQ	ENSG00000105373.14	19_48247701_C_G_b37	19_48180826_G_A_b37	Independent	5.67675	NaN	NaN	-0.156832	-0.237542	-0.0761229	-0.401526	-0.616943	-0.18611	-0.558359	NaN	NaN
ADPSBQ	ENSG00000105483.12	19_48740358_A_G_b37	19_48724250_G_A_b37	Independent	5.39816	NaN	NaN	0.126187	0.0412	0.211175	-0.474966	-0.781481	-0.168451	-0.348779	NaN	NaN
ADPSBQ	ENSG00000182264.4	19_49252679_T_C_b37	19_49251755_G_A_b37	Independent	5.67332	NaN	NaN	1.38027	1.11166	1.64887	-0.823826	-1.10636	-0.541292	0.556441	NaN	NaN
ADPSBQ	ENSG00000087076.4	19_49354329_C_T_b37	19_49381365_A_G_b37	Independent	5.52566	NaN	NaN	-1.08792	-1.43605	-0.739781	-0.371871	-0.562191	-0.18155	-1.45979	NaN	NaN
ADPSBQ	ENSG00000104852.10	19_49588746_C_T_b37	19_49559963_C_G_b37	Independent	5.36961	NaN	NaN	-0.2794	-0.35017	-0.208629	0.143191	0.0820858	0.204297	-0.136208	NaN	NaN
ADPSBQ	ENSG00000104960.11	19_50778443_G_A_b37	19_50363585_CAG_C_b37	Independent	4.1194	NaN	NaN	-0.30496	-0.725779	0.115859	0.070313	0.020124	0.120502	-0.234647	NaN	NaN
ADPSBQ	ENSG00000254521.2	19_52003331_G_C_b37	19_52004469_C_T_b37	Independent	5.67332	NaN	NaN	-1.15593	-1.41731	-0.894542	-1.52327	-1.80752	-1.23902	-2.6792	NaN	NaN
ADPSBQ	ENSG00000105501.7	19_52169702_G_A_b37	19_52133734_G_A_b37	Independent	3.63859	NaN	NaN	-0.770044	-1.25192	-0.288164	-3.93258	-11.2637	3.39851	-4.70262	NaN	NaN
ADPSBQ	ENSG00000221923.4	19_52880766_C_T_b37	19_52887437_A_C_b37	Independent	-1.14775	-11.1163	5.69036	0.656644	0.568216	0.745072	-0.236379	-0.338456	-0.134302	0.420265	NaN	NaN
ADPSBQ	ENSG00000269834.1	19_52900846_G_A_b37	19_52881854_C_G_b37	Independent	4.51954	NaN	NaN	-0.927721	-1.26382	-0.591619	-0.301174	-0.434096	-0.168252	-1.22889	NaN	NaN
ADPSBQ	ENSG00000189190.7	19_53284720_C_G_b37	19_53284658_C_T_b37	Independent	5.03696	NaN	NaN	0.383172	0.247393	0.518951	-0.58832	-0.775907	-0.400734	-0.205148	NaN	NaN
ADPSBQ	ENSG00000182986.8	19_53400760_C_A_b37	19_53397065_G_A_b37	Independent	5.59129	NaN	NaN	-0.60163	-0.657152	-0.546109	-0.37892	-0.447877	-0.309963	-0.98055	NaN	NaN
ADPSBQ	ENSG00000269001.1	19_53704949_A_C_b37	19_53687818_C_T_b37	Independent	4.64745	NaN	NaN	-0.62032	-0.761621	-0.479019	0.370877	0.228419	0.513335	-0.249443	NaN	NaN
ADPSBQ	ENSG00000170892.6	19_53885026_T_C_b37	19_55071888_C_T_b37	Independent	5.35755	NaN	NaN	-0.291442	-0.438796	-0.144088	-0.244777	-0.363369	-0.126185	-0.53622	NaN	NaN
ADPSBQ	ENSG00000160336.10	19_53938619_A_G_b37	19_53935160_G_A_b37	Independent	-1.01877	-14.8223	5.35888	-0.298567	-0.386497	-0.210638	0.191328	0.0811297	0.301526	-0.10724	NaN	NaN
ADPSBQ	ENSG00000250731.1	19_53951211_G_C_b37	19_53944732_C_T_b37	Independent	5.51784	NaN	NaN	0.84881	0.628207	1.06941	-0.630209	-1.01736	-0.243056	0.2186	NaN	NaN
ADPSBQ	ENSG00000167608.7	19_54111537_AC_A_b37	19_54676814_G_GC_b37	Independent	4.76744	NaN	NaN	-0.924597	-1.09496	-0.754235	0.41198	0.233341	0.590619	-0.512617	NaN	NaN
ADPSBQ	ENSG00000170909.9	19_54551115_G_T_b37	19_54594798_A_G_b37	Independent	2.71288	NaN	NaN	-0.331436	-0.454549	-0.208324	1.35475	0.671307	2.03818	1.02331	NaN	NaN
ADPSBQ	ENSG00000170889.9	19_54711258_T_G_b37	19_54704997_G_T_b37	Independent	5.66988	NaN	NaN	0.28425	0.242715	0.325786	-0.267846	-0.317117	-0.218575	0.0164043	NaN	NaN
ADPSBQ	ENSG00000239961.2	19_54748396_T_C_b37	19_54723495_T_C_b37	Independent	5.49697	NaN	NaN	1.18072	0.867098	1.49434	1.08196	0.737536	1.42639	2.26268	NaN	NaN
ADPSBQ	ENSG00000244482.5	19_54748760_G_T_b37	19_54736320_A_G_b37	Independent	3.46296	NaN	NaN	0.59523	0.469294	0.721167	-0.36165	-0.48988	-0.233419	0.233581	NaN	NaN
ADPSBQ	ENSG00000221957.4	19_55341167_C_G_b37	19_55385406_G_A_b37	Independent	4.28157	NaN	NaN	1.40012	1.13624	1.66399	1.03029	0.626666	1.43391	2.4304	NaN	NaN
ADPSBQ	ENSG00000022556.11	19_55498129_T_C_b37	19_55467077_T_C_b37	Independent	3.15322	NaN	NaN	0.987584	0.662825	1.31234	0.996854	0.657882	1.33583	1.98444	NaN	NaN
ADPSBQ	ENSG00000198046.7	19_57081942_C_T_b37	19_56983728_G_A_b37	Independent	5.06617	NaN	NaN	0.321934	0.195624	0.448244	0.361935	0.227708	0.496161	0.683869	NaN	NaN
ADPSBQ	ENSG00000127903.12	19_57087158_T_C_b37	19_57182549_G_T_b37	Independent	4.2783	NaN	NaN	0.366017	0.212787	0.519247	0.363303	0.210726	0.51588	0.72932	NaN	NaN
ADPSBQ	ENSG00000268182.1	19_57132734_A_G_b37	19_57134574_C_G_b37	Independent	5.65505	NaN	NaN	2.06266	1.55408	2.57125	-0.766833	-1.11436	-0.41931	1.29583	NaN	NaN
ADPSBQ	ENSG00000186230.6	19_57185532_A_G_b37	19_57898833_T_C_b37	Independent	5.65599	NaN	NaN	0.229188	0.1262	0.332177	-2.00135	-4.38056	0.377863	-1.77216	NaN	NaN
ADPSBQ	ENSG00000105136.15	19_57982338_C_CA_b37	19_58008943_G_GGACA_b37	Independent	5.33525	NaN	NaN	-0.36551	-0.450396	-0.280623	-0.250624	-0.340663	-0.160586	-0.616134	NaN	NaN
ADPSBQ	ENSG00000269343.2	19_58354536_A_G_b37	19_58495387_T_C_b37	Independent	5.68358	NaN	NaN	-0.252754	-0.336884	-0.168623	-0.660256	-0.970901	-0.349611	-0.91301	NaN	NaN
ADPSBQ	ENSG00000270804.1	19_58379986_C_T_b37	19_58378924_A_G_b37	Independent	5.53054	NaN	NaN	1.0214	0.778333	1.26447	-0.595118	-0.834918	-0.355317	0.426283	NaN	NaN
ADPSBQ	ENSG00000176593.3	19_58498545_T_C_b37	19_58486853_C_G_b37	Independent	-1.48752	-19.2472	5.67675	-0.473104	-0.611643	-0.334564	0.686434	0.572789	0.800078	0.21333	NaN	NaN
ADPSBQ	ENSG00000176293.15	19_58567696_G_A_b37	19_58572979_G_A_b37	Independent	5.349	NaN	NaN	-0.219071	-0.301254	-0.136887	0.524038	0.376767	0.671308	0.304967	NaN	NaN
ADPSBQ	ENSG00000268049.1	19_58868480_G_T_b37	19_58842802_T_C_b37	Independent	4.06718	NaN	NaN	0.339565	0.102725	0.576406	-0.898539	-1.34584	-0.451239	-0.558974	NaN	NaN
ADPSBQ	ENSG00000152475.6	19_58901148_C_T_b37	19_58882384_A_G_b37	Independent	5.59471	NaN	NaN	-0.478639	-0.686374	-0.270903	-0.667182	-1.17173	-0.162634	-1.14582	NaN	NaN
ADPSBQ	ENSG00000131849.10	19_58937836_G_A_b37	19_58926426_AT_A_b37	Independent	4.78266	NaN	NaN	-0.446465	-0.578344	-0.314585	-0.290279	-0.383678	-0.196879	-0.736743	NaN	NaN
ADPSBQ	ENSG00000125733.13	19_6751279_A_G_b37	19_6744762_A_C_b37	Independent	4.75412	NaN	NaN	-0.289828	-0.382284	-0.197372	0.25733	0.146753	0.367908	-0.0324976	NaN	NaN
ADPSBQ	ENSG00000268758.1	19_7013645_C_A_b37	19_7437349_A_G_b37	Independent	-0.243341	-12.4571	5.60608	1.1626	0.912413	1.41279	0.594754	0.352298	0.83721	1.75736	NaN	NaN
ADPSBQ	ENSG00000104921.10	19_7768952_TC_T_b37	19_7765266_G_A_b37	Independent	3.57894	NaN	NaN	-1.05153	-1.32339	-0.779676	-1.39081	-1.94106	-0.84056	-2.44234	NaN	NaN
ADPSBQ	ENSG00000182566.8	19_7772561_C_A_b37	19_7801383_TTCC_T_b37	Independent	0.6211	NaN	NaN	1.85038	1.37837	2.32239	-1.43828	-2.21058	-0.665978	0.412104	NaN	NaN
ADPSBQ	ENSG00000188000.2	19_9250984_A_C_b37	19_9195972_G_A_b37	Independent	5.68699	NaN	NaN	4.04106	3.83049	4.25163	-6.64386	-47.8012	34.5135	-2.60279	NaN	NaN
ADPSBQ	ENSG00000188321.9	19_9434872_C_T_b37	19_9394207_C_A_b37	Independent	0.992455	NaN	NaN	-1.06802	-1.19461	-0.941421	0.107542	0.0540363	0.161048	-0.960475	NaN	NaN
ADPSBQ	ENSG00000065268.6	19_990819_G_A_b37	19_990645_G_A_b37	Independent	5.66643	NaN	NaN	-0.4908	-0.55314	-0.42846	0.477515	0.388559	0.566471	-0.0132849	NaN	NaN
ADPSBQ	ENSG00000144218.14	2_101580333_G_A_b37	2_100220708_G_C_b37	Independent	5.56921	NaN	NaN	0.481904	0.29005	0.673758	0.713673	0.394238	1.03311	1.19558	NaN	NaN
ADPSBQ	ENSG00000196460.8	2_102031489_C_G_b37	2_102091075_G_A_b37	Independent	4.90784	NaN	NaN	0.802412	0.598359	1.00647	0.510174	0.29336	0.726989	1.31259	NaN	NaN
ADPSBQ	ENSG00000198075.5	2_108989874_C_T_b37	2_108913090_G_T_b37	Independent	3.90526	NaN	NaN	0.477101	0.341028	0.613174	-4.60916	-5.31017	-3.90815	-4.13206	NaN	NaN
ADPSBQ	ENSG00000135968.15	2_109088868_G_A_b37	2_109117631_C_T_b37	Independent	5.43372	NaN	NaN	0.445978	0.396906	0.49505	-0.120485	-0.171313	-0.0696577	0.325493	NaN	NaN
ADPSBQ	ENSG00000186522.10	2_110299102_G_A_b37	2_110371248_C_A_b37	Independent	5.5835	NaN	NaN	-0.248336	-0.305358	-0.191314	-0.18091	-0.260855	-0.100966	-0.429247	NaN	NaN
ADPSBQ	ENSG00000260077.1	2_11063469_G_C_b37	2_10182854_T_A_b37	Independent	5.66475	NaN	NaN	-0.96914	-1.4149	-0.523379	-0.387263	-0.551082	-0.223445	-1.3564	NaN	NaN
ADPSBQ	ENSG00000184115.12	2_111560358_C_T_b37	2_110276319_C_T_b37	Independent	4.90295	NaN	NaN	-1.36557	-2.18112	-0.550007	-3.07502	-6.26923	0.119195	-4.44058	NaN	NaN
ADPSBQ	ENSG00000144152.8	2_112841856_T_C_b37	2_112907173_G_A_b37	Independent	1.97272	NaN	NaN	-2.35447	-3.4872	-1.22173	0.428259	0.271571	0.584947	-1.92621	NaN	NaN
ADPSBQ	ENSG00000169629.7	2_113229110_C_T_b37	2_113212342_T_A_b37	Independent	5.65948	NaN	NaN	-1.91645	-2.11446	-1.71845	-0.408097	-0.557216	-0.258978	-2.32455	NaN	NaN
ADPSBQ	ENSG00000125618.12	2_113974196_G_C_b37	2_113993344_A_C_b37	Independent	3.98615	NaN	NaN	-2.81932	-3.0796	-2.55904	-0.510169	-0.778682	-0.241657	-3.32949	NaN	NaN
ADPSBQ	ENSG00000189223.9	2_113993344_A_C_b37	2_113982040_C_A_b37	Independent	-1.61056	-35.9301	5.66988	-3.36367	-3.67346	-3.05388	0.566611	0.312277	0.820946	-2.79706	NaN	NaN
ADPSBQ	ENSG00000236397.2	2_114366384_A_T_b37	2_114412089_T_C_b37	Independent	-6.28201	-31.1062	5.03055	1.22692	0.59	1.86385	1.79872	1.13493	2.4625	3.02564	NaN	NaN
ADPSBQ	ENSG00000236255.1	2_118114559_C_A_b37	2_118519547_G_A_b37	Independent	5.1448	NaN	NaN	-0.525298	-0.704506	-0.346091	0.741704	0.349686	1.13372	0.216406	NaN	NaN
ADPSBQ	ENSG00000088205.8	2_118790661_A_G_b37	2_118576188_G_A_b37	Independent	4.36591	NaN	NaN	-0.12257	-0.169573	-0.0755675	0.0795099	0.0135624	0.145457	-0.0430605	NaN	NaN
ADPSBQ	ENSG00000125629.10	2_118881001_G_A_b37	2_118879828_A_G_b37	Independent	5.69373	NaN	NaN	-0.505922	-0.713474	-0.298369	0.1311	0.0628952	0.199304	-0.374822	NaN	NaN
ADPSBQ	ENSG00000115107.15	2_120021319_C_T_b37	2_120048729_A_G_b37	Independent	0.454746	NaN	NaN	0.535094	0.407976	0.662211	-0.270559	-0.389968	-0.15115	0.264534	NaN	NaN
ADPSBQ	ENSG00000171227.6	2_120497918_C_A_b37	2_121187063_T_C_b37	Independent	4.19656	NaN	NaN	0.873757	0.540076	1.20744	0.526895	0.289048	0.764743	1.40065	NaN	NaN
ADPSBQ	ENSG00000136732.10	2_127355376_C_CT_b37	2_127499200_C_T_b37	Independent	5.5333	NaN	NaN	-0.327983	-0.491303	-0.164662	0.328297	0.157613	0.498981	0.000314363	NaN	NaN
ADPSBQ	ENSG00000163161.8	2_128133076_G_C_b37	2_128111651_A_C_b37	Independent	4.92375	NaN	NaN	-0.153642	-0.206366	-0.100918	0.0920624	0.0449099	0.139215	-0.0615796	NaN	NaN
ADPSBQ	ENSG00000169967.12	2_128145472_G_A_b37	2_128222891_TA_T_b37	Independent	4.94036	NaN	NaN	-0.160378	-0.196425	-0.124331	-0.123564	-0.182721	-0.064407	-0.283942	NaN	NaN
ADPSBQ	ENSG00000169994.14	2_128400992_A_G_b37	2_128395899_A_ATGTC_b37	Independent	5.68692	NaN	NaN	0.885018	0.56009	1.20995	-0.764491	-1.09596	-0.43302	0.120527	NaN	NaN
ADPSBQ	ENSG00000272789.1	2_128400992_A_G_b37	2_128404808_T_C_b37	Independent	5.67675	NaN	NaN	-1.04531	-1.47299	-0.617625	1.35297	0.910869	1.79507	0.307658	NaN	NaN
ADPSBQ	ENSG00000270081.1	2_129211120_C_T_b37	2_128595557_T_TC_b37	Independent	4.35692	NaN	NaN	-0.622334	-0.725595	-0.519072	-0.381671	-0.538401	-0.224941	-1.004	NaN	NaN
ADPSBQ	ENSG00000225449.2	2_130736944_A_T_b37	2_130737541_C_T_b37	Independent	5.59842	NaN	NaN	1.36023	1.05163	1.66882	3.30081	2.80512	3.7965	4.66104	NaN	NaN
ADPSBQ	ENSG00000152117.13	2_132276435_C_T_b37	2_132277962_T_C_b37	Independent	5.59471	NaN	NaN	-0.464201	-0.55761	-0.370793	-0.294215	-0.358083	-0.230347	-0.758417	NaN	NaN
ADPSBQ	ENSG00000115866.6	2_136560761_C_G_b37	2_136696010_T_A_b37	Independent	5.69036	NaN	NaN	0.129625	0.0831047	0.176144	0.426644	0.290338	0.56295	0.556268	NaN	NaN
ADPSBQ	ENSG00000144229.7	2_137660927_A_G_b37	2_137670755_C_T_b37	Independent	5.49717	NaN	NaN	1.07376	0.773286	1.37424	-0.758645	-1.04273	-0.474561	0.31512	NaN	NaN
ADPSBQ	ENSG00000231969.1	2_149568261_CT_C_b37	2_150531511_CGA_C_b37	Independent	3.41535	NaN	NaN	0.765465	0.452522	1.07841	-0.505094	-0.820848	-0.189341	0.260371	NaN	NaN
ADPSBQ	ENSG00000080345.13	2_152279283_A_G_b37	2_152318713_TATC_T_b37	Independent	5.51295	NaN	NaN	-0.132151	-0.176172	-0.0881298	-0.253429	-0.29381	-0.213048	-0.38558	NaN	NaN
ADPSBQ	ENSG00000177519.3	2_154246449_T_G_b37	2_153646760_AAAAC_A_b37	Independent	4.01442	NaN	NaN	0.793469	0.491107	1.09583	-0.573601	-0.846181	-0.301022	0.219868	NaN	NaN
ADPSBQ	ENSG00000115221.6	2_161088655_G_A_b37	2_161118687_T_C_b37	Independent	5.69036	NaN	NaN	-1.27257	-1.54263	-1.00252	1.14356	0.79809	1.48904	-0.129009	NaN	NaN
ADPSBQ	ENSG00000182263.9	2_164471196_G_A_b37	2_164548377_G_C_b37	Independent	5.35293	NaN	NaN	0.449338	0.297634	0.601043	-0.775103	-1.14355	-0.406658	-0.325765	NaN	NaN
ADPSBQ	ENSG00000115290.5	2_165299287_A_G_b37	2_165438230_G_A_b37	Independent	-24.0661	-70.3938	5.69036	1.37361	0.87888	1.86833	0.442537	0.240132	0.644941	1.81614	NaN	NaN
ADPSBQ	ENSG00000115339.9	2_166724916_G_A_b37	2_166717184_G_C_b37	Independent	3.41831	NaN	NaN	0.568459	0.41988	0.717038	0.605833	0.43044	0.781226	1.17429	NaN	NaN
ADPSBQ	ENSG00000144362.7	2_169855095_T_A_b37	2_170562697_T_TCA_b37	Independent	4.80392	NaN	NaN	-0.649617	-0.81078	-0.488454	0.812626	0.334491	1.29076	0.163009	NaN	NaN
ADPSBQ	ENSG00000071967.7	2_172378432_G_A_b37	2_172381487_G_A_b37	Independent	5.60121	NaN	NaN	-0.54063	-0.642755	-0.438504	-0.222597	-0.293266	-0.151928	-0.763226	NaN	NaN
ADPSBQ	ENSG00000077380.11	2_172577116_T_C_b37	2_173334476_T_A_b37	Independent	3.60821	NaN	NaN	-0.122356	-0.158085	-0.0866271	-0.263224	-0.379461	-0.146987	-0.38558	NaN	NaN
ADPSBQ	ENSG00000224577.1	2_177330967_A_C_b37	2_177096308_C_T_b37	Independent	-0.308707	-19.005	5.67843	0.534185	0.324632	0.743738	-0.396435	-0.57304	-0.219829	0.13775	NaN	NaN
ADPSBQ	ENSG00000213963.2	2_178270734_G_A_b37	2_178144477_G_A_b37	Independent	5.65586	NaN	NaN	-0.244321	-0.357016	-0.131625	-0.412451	-0.60078	-0.224122	-0.656771	NaN	NaN
ADPSBQ	ENSG00000178295.10	2_17955255_G_A_b37	2_17954647_T_G_b37	Independent	5.69373	NaN	NaN	0.98747	0.824833	1.15011	-0.305642	-0.44918	-0.162103	0.681829	NaN	NaN
ADPSBQ	ENSG00000170745.7	2_18048653_C_T_b37	2_18061117_G_C_b37	Independent	5.69036	NaN	NaN	0.74116	0.598257	0.884062	0.443692	0.260193	0.627191	1.18485	NaN	NaN
ADPSBQ	ENSG00000150722.6	2_182887637_A_G_b37	2_182087136_G_A_b37	Independent	5.60934	NaN	NaN	1.09112	0.783338	1.39889	-4.32451	-13.5832	4.93415	-3.23339	NaN	NaN
ADPSBQ	ENSG00000144369.8	2_187788718_AACAG_A_b37	2_187562355_A_G_b37	Independent	5.31253	NaN	NaN	-0.410474	-0.548703	-0.272245	-0.30486	-0.445828	-0.163893	-0.715335	NaN	NaN
ADPSBQ	ENSG00000138381.5	2_190679241_C_CATAA_b37	2_190579598_G_A_b37	Independent	4.73503	NaN	NaN	0.490607	0.351042	0.630171	0.274872	0.137299	0.412445	0.765479	NaN	NaN
ADPSBQ	ENSG00000065413.12	2_197855152_T_C_b37	2_198757616_G_A_b37	Independent	4.78014	NaN	NaN	-0.36054	-0.45299	-0.26809	-0.249815	-0.341113	-0.158516	-0.610355	NaN	NaN
ADPSBQ	ENSG00000226124.2	2_200658266_C_CACA_b37	2_200625581_T_C_b37	Independent	5.60681	NaN	NaN	-1.18592	-1.38263	-0.989211	-0.464219	-0.663226	-0.265212	-1.65014	NaN	NaN
ADPSBQ	ENSG00000243478.3	2_201571143_G_A_b37	2_201560740_T_G_b37	Independent	2.30844	NaN	NaN	-1.89716	-2.36853	-1.4258	-0.862836	-1.14808	-0.577594	-2.76	NaN	NaN
ADPSBQ	ENSG00000240344.4	2_201734921_G_A_b37	2_201742345_C_T_b37	Independent	5.47263	NaN	NaN	-0.723952	-0.813986	-0.633919	-0.351562	-0.463311	-0.239813	-1.07551	NaN	NaN
ADPSBQ	ENSG00000138380.13	2_203862724_T_A_b37	2_203667526_G_T_b37	Independent	2.24477	NaN	NaN	0.139947	0.078693	0.201201	-0.17727	-0.282398	-0.0721426	-0.0373229	NaN	NaN
ADPSBQ	ENSG00000132031.8	2_20386961_A_G_b37	2_20155534_G_A_b37	Independent	5.69373	NaN	NaN	-1.0105	-1.40655	-0.614455	0.620094	0.396079	0.844108	-0.390408	NaN	NaN
ADPSBQ	ENSG00000197713.10	2_211167802_C_T_b37	2_210848062_TA_T_b37	Independent	5.12934	NaN	NaN	-0.0737912	-0.116699	-0.0308832	0.294475	0.144575	0.444375	0.220684	NaN	NaN
ADPSBQ	ENSG00000021826.10	2_211231614_A_G_b37	2_211335761_CTTT_C_b37	Independent	-0.0253312	-13.2062	5.13001	0.691726	0.577782	0.805671	-1.39237	-2.35879	-0.425958	-0.700647	NaN	NaN
ADPSBQ	ENSG00000233005.1	2_21205457_G_A_b37	2_21449940_G_C_b37	Independent	5.46464	NaN	NaN	0.845794	0.666254	1.02533	-0.414205	-0.601969	-0.22644	0.431589	NaN	NaN
ADPSBQ	ENSG00000138363.10	2_216176807_T_G_b37	2_216176780_C_T_b37	Independent	4.71652	NaN	NaN	0.330672	0.259451	0.401894	0.203697	0.139514	0.267881	0.53437	NaN	NaN
ADPSBQ	ENSG00000260804.2	2_216963189_T_C_b37	2_217070057_G_A_b37	Independent	5.65948	NaN	NaN	1.3569	1.16226	1.55155	0.537455	-0.0129106	1.08782	1.89436	NaN	NaN
ADPSBQ	ENSG00000177483.7	2_238687216_T_A_b37	2_238707478_C_T_b37	Independent	5.62762	NaN	NaN	0.709646	0.595179	0.824113	-0.931848	-1.30584	-0.557851	-0.222202	NaN	NaN
ADPSBQ	ENSG00000186235.6	2_239151041_G_C_b37	2_239245682_G_T_b37	Independent	5.63479	NaN	NaN	1.53095	1.27219	1.78972	-2.54408	-4.25799	-0.830161	-1.01312	NaN	NaN
ADPSBQ	ENSG00000173960.8	2_23939467_C_T_b37	2_23875978_T_A_b37	Independent	5.65249	NaN	NaN	0.185488	0.124173	0.246803	0.308215	0.115746	0.500683	0.493703	NaN	NaN
ADPSBQ	ENSG00000122085.12	2_241513972_C_T_b37	2_242034474_C_A_b37	Independent	5.3488	NaN	NaN	-0.41202	-0.572651	-0.251389	0.162996	0.1021	0.223891	-0.249024	NaN	NaN
ADPSBQ	ENSG00000178623.7	2_241538061_T_C_b37	2_241561088_G_T_b37	Independent	4.33579	NaN	NaN	0.666991	0.514677	0.819306	-0.497138	-0.626114	-0.368162	0.169853	NaN	NaN
ADPSBQ	ENSG00000168385.13	2_242294913_A_G_b37	2_242163359_G_A_b37	Independent	5.65948	NaN	NaN	0.410702	0.361377	0.460026	-0.0939833	-0.133925	-0.0540415	0.316718	NaN	NaN
ADPSBQ	ENSG00000146205.9	2_242400847_TC_T_b37	2_242157241_G_A_b37	Independent	5.61677	NaN	NaN	1.09445	0.910363	1.27853	0.975441	0.547983	1.4029	2.06989	NaN	NaN
ADPSBQ	ENSG00000176720.3	2_242497851_A_G_b37	2_242498240_GGGAAGCCCCGT_G_b37	Independent	5.66988	NaN	NaN	0.263178	0.165087	0.36127	0.695007	0.509845	0.880169	0.958185	NaN	NaN
ADPSBQ	ENSG00000180902.12	2_242697998_C_G_b37	2_242710197_C_T_b37	Independent	4.89718	NaN	NaN	-0.298407	-0.413432	-0.183383	-0.251441	-0.372842	-0.13004	-0.549848	NaN	NaN
ADPSBQ	ENSG00000204099.7	2_242770637_A_C_b37	2_242755965_C_T_b37	Independent	0.823716	NaN	NaN	-1.56266	-1.94121	-1.1841	0.808761	0.488083	1.12944	-0.753898	NaN	NaN
ADPSBQ	ENSG00000188389.6	2_242789044_C_T_b37	2_242753797_G_A_b37	Independent	5.64545	NaN	NaN	-0.694807	-0.959744	-0.429869	1.30944	0.942812	1.67607	0.614634	NaN	NaN
ADPSBQ	ENSG00000220804.4	2_242850012_C_T_b37	2_242894617_G_A_b37	Not Independent	-42.3496	-89.3247	-2.93157	-2.854	-3.38686	-3.38686	0.279812	-0.131197	0.690821	-0.170369	-0.464168	0.12343
ADPSBQ	ENSG00000216921.3	2_242850012_C_T_b37	2_242866679_C_A_b37	Independent	5.6204	NaN	NaN	1.47852	0.805541	2.1515	-1.87607	-3.12324	-0.628892	-0.397543	NaN	NaN
ADPSBQ	ENSG00000163803.8	2_28846035_G_A_b37	2_28820693_A_G_b37	Independent	5.67675	NaN	NaN	-2.51306	-4.33463	-0.691485	-0.300443	-0.436715	-0.16417	-2.8135	NaN	NaN
ADPSBQ	ENSG00000213626.7	2_30473177_T_C_b37	2_30024901_C_G_b37	Independent	5.49847	NaN	NaN	-0.550403	-0.745367	-0.35544	-0.479462	-0.715501	-0.243423	-1.02987	NaN	NaN
ADPSBQ	ENSG00000172954.9	2_30704104_T_C_b37	2_30664111_A_G_b37	Independent	1.9394	NaN	NaN	-0.49464	-0.655809	-0.333471	0.317326	0.157227	0.477426	-0.177314	NaN	NaN
ADPSBQ	ENSG00000225234.1	2_3183956_C_G_b37	2_3485242_G_C_b37	Independent	2.92116	NaN	NaN	-1.19835	-1.36139	-1.03532	-0.680349	-1.04431	-0.31639	-1.8787	NaN	NaN
ADPSBQ	ENSG00000152683.10	2_33023449_A_G_b37	2_32361482_T_TC_b37	Independent	5.14662	NaN	NaN	0.0650097	0.0308735	0.0991459	0.113542	0.0591717	0.167913	0.178552	NaN	NaN
ADPSBQ	ENSG00000182551.9	2_3509687_G_A_b37	2_3499045_G_A_b37	Independent	5.66643	NaN	NaN	0.562566	0.384712	0.740421	0.207627	0.136316	0.278938	0.770194	NaN	NaN
ADPSBQ	ENSG00000119787.9	2_38550413_C_A_b37	2_38749920_C_A_b37	Independent	2.31635	NaN	NaN	0.151149	0.100056	0.202242	-0.107435	-0.156352	-0.0585186	0.0437138	NaN	NaN
ADPSBQ	ENSG00000115944.10	2_42574080_T_C_b37	2_42410283_G_A_b37	Independent	5.19071	NaN	NaN	-0.239604	-0.277605	-0.201603	-0.114535	-0.169105	-0.0599642	-0.354139	NaN	NaN
ADPSBQ	ENSG00000115970.14	2_43186201_G_A_b37	2_43810698_C_T_b37	Independent	3.22136	NaN	NaN	-0.177707	-0.264458	-0.0909564	-0.150668	-0.241412	-0.0599252	-0.328376	NaN	NaN
ADPSBQ	ENSG00000138095.14	2_44098629_C_G_b37	2_44236967_A_C_b37	Independent	2.92122	NaN	NaN	-0.16325	-0.206709	-0.11979	0.475252	0.306087	0.644417	0.312002	NaN	NaN
ADPSBQ	ENSG00000116062.10	2_47992681_T_G_b37	2_48022981_G_T_b37	Independent	5.30921	NaN	NaN	0.144565	0.0920646	0.197064	0.0989857	0.0513783	0.146593	0.24355	NaN	NaN
ADPSBQ	ENSG00000115310.13	2_55197882_A_T_b37	2_55241216_A_T_b37	Independent	1.92387	NaN	NaN	-0.225722	-0.292276	-0.159168	0.184144	0.115432	0.252856	-0.0415777	NaN	NaN
ADPSBQ	ENSG00000272180.1	2_56403461_T_A_b37	2_56413345_G_T_b37	Independent	1.2509	NaN	NaN	1.9121	1.19348	2.63073	-0.376645	-0.572664	-0.180626	1.53546	NaN	NaN
ADPSBQ	ENSG00000173209.18	2_61389799_G_A_b37	2_61373930_C_T_b37	Independent	-1.36414	-24.7427	5.65249	-0.212822	-0.288304	-0.13734	-0.271879	-0.360376	-0.183382	-0.484702	NaN	NaN
ADPSBQ	ENSG00000225889.3	2_64500320_TCA_T_b37	2_64476336_T_C_b37	Independent	4.81015	NaN	NaN	-0.604784	-0.774481	-0.435086	-0.615624	-0.842757	-0.388492	-1.22041	NaN	NaN
ADPSBQ	ENSG00000119865.4	2_68638599_C_G_b37	2_69454593_A_AG_b37	Independent	-15.8144	-89.697	5.65249	-0.169913	-0.222929	-0.116896	0.49411	0.293705	0.694516	0.324198	NaN	NaN
ADPSBQ	ENSG00000205837.3	2_6935623_C_T_b37	2_6990020_C_T_b37	Independent	5.43193	NaN	NaN	1.33021	1.02799	1.63243	0.850881	0.60143	1.10033	2.18109	NaN	NaN
ADPSBQ	ENSG00000198380.8	2_69954313_A_G_b37	2_69698158_G_A_b37	Independent	4.70612	NaN	NaN	0.16322	0.0956358	0.230804	-0.257298	-0.365578	-0.149017	-0.094078	NaN	NaN
ADPSBQ	ENSG00000144043.7	2_70756751_T_C_b37	2_71214755_G_A_b37	Independent	2.53718	NaN	NaN	0.19335	0.14953	0.237169	0.0800753	0.0252536	0.134897	0.273425	NaN	NaN
ADPSBQ	ENSG00000035141.3	2_70818468_A_C_b37	2_71258691_G_A_b37	Independent	5.24402	NaN	NaN	-0.395122	-0.66155	-0.128695	0.130174	0.0703884	0.18996	-0.264949	NaN	NaN
ADPSBQ	ENSG00000172554.7	2_723116_G_T_b37	2_1087933_TAGAG_T_b37	Independent	3.77883	NaN	NaN	0.551618	0.414856	0.68838	-0.327101	-0.475839	-0.178363	0.224517	NaN	NaN
ADPSBQ	ENSG00000257800.1	2_74350441_C_G_b37	2_74347576_G_T_b37	Independent	5.41209	NaN	NaN	0.859149	0.690948	1.02735	0.605709	0.40964	0.801779	1.46486	NaN	NaN
ADPSBQ	ENSG00000115275.7	2_74497453_A_G_b37	2_74738322_A_G_b37	Independent	5.68358	NaN	NaN	0.283725	0.192931	0.374518	0.131242	0.0746111	0.187873	0.414967	NaN	NaN
ADPSBQ	ENSG00000270696.1	2_75914130_G_A_b37	2_75888096_G_A_b37	Independent	5.66988	NaN	NaN	0.591556	0.490136	0.692977	-0.216728	-0.307802	-0.125654	0.374828	NaN	NaN
ADPSBQ	ENSG00000235688.1	2_792464_T_C_b37	2_1092884_G_T_b37	Independent	5.13844	NaN	NaN	0.628727	0.419467	0.837988	0.396557	0.251351	0.541764	1.02528	NaN	NaN
ADPSBQ	ENSG00000115423.14	2_84687829_AT_A_b37	2_84686757_A_G_b37	Independent	5.69036	NaN	NaN	-2.27427	-2.54035	-2.00818	-0.538303	-0.766225	-0.310381	-2.81257	NaN	NaN
ADPSBQ	ENSG00000042445.9	2_85636195_T_C_b37	2_85574456_A_G_b37	Independent	4.71695	NaN	NaN	0.487403	0.34575	0.629057	0.279248	0.153564	0.404932	0.766651	NaN	NaN
ADPSBQ	ENSG00000115523.12	2_85933003_C_T_b37	2_85916487_G_A_b37	Independent	5.67223	NaN	NaN	0.937736	0.735958	1.13951	-0.476045	-0.669222	-0.282869	0.461691	NaN	NaN
ADPSBQ	ENSG00000068654.11	2_86350664_A_G_b37	2_86246672_G_A_b37	Independent	5.68698	NaN	NaN	0.341025	0.264079	0.417971	0.348048	0.210374	0.485722	0.689073	NaN	NaN
ADPSBQ	ENSG00000183281.10	2_87123824_C_T_b37	2_87151870_C_G_b37	Independent	5.28827	NaN	NaN	1.25498	NaN	NaN	0	NaN	NaN	1.25498	NaN	NaN
ADPSBQ	ENSG00000234231.2	2_87821567_G_A_b37	2_87997476_A_G_b37	Independent	5.44712	NaN	NaN	-0.422212	-0.571251	-0.273174	-0.30446	-0.410605	-0.198316	-0.726673	NaN	NaN
ADPSBQ	ENSG00000186281.8	2_96786713_TCAGGGCCGTCCC_T_b37	2_96885872_AC_A_b37	Independent	5.61313	NaN	NaN	-2.2958	-3.6233	-0.968305	-0.548763	-0.805196	-0.292329	-2.84457	NaN	NaN
ADPSBQ	ENSG00000144028.10	2_97579270_T_C_b37	2_97022534_C_G_b37	Independent	5.46667	NaN	NaN	-0.206728	-0.322151	-0.0913036	0.059944	0.0215006	0.0983874	-0.146784	NaN	NaN
ADPSBQ	ENSG00000119203.9	2_9814481_A_G_b37	2_9629298_G_GTTC_b37	Independent	0.183897	NaN	NaN	-0.170293	-0.230668	-0.109919	0.126581	0.0624982	0.190664	-0.0437122	NaN	NaN
ADPSBQ	ENSG00000125818.13	20_1115919_A_G_b37	20_1100669_A_G_b37	Independent	5.68698	NaN	NaN	0.165623	0.131584	0.199662	-0.168613	-0.212486	-0.124741	-0.00299008	NaN	NaN
ADPSBQ	ENSG00000101247.13	20_13745905_A_G_b37	20_13786587_A_G_b37	Independent	5.66463	NaN	NaN	0.348914	0.268935	0.428892	0.144727	0.0826213	0.206833	0.493641	NaN	NaN
ADPSBQ	ENSG00000089177.13	20_16553107_TC_T_b37	20_16543566_A_G_b37	Independent	5.64191	NaN	NaN	0.18197	0.124463	0.239478	0.293412	0.187966	0.398858	0.475382	NaN	NaN
ADPSBQ	ENSG00000125844.11	20_16927613_G_A_b37	20_17594714_GC_G_b37	Independent	2.15363	NaN	NaN	-0.17629	-0.244873	-0.107707	-0.314128	-0.503074	-0.125183	-0.490418	NaN	NaN
ADPSBQ	ENSG00000230387.1	20_23168500_G_A_b37	20_23170450_G_A_b37	Independent	5.68698	NaN	NaN	1.72224	1.45465	1.98983	-0.96973	-1.49319	-0.446273	0.75251	NaN	NaN
ADPSBQ	ENSG00000270001.1	20_24054931_T_C_b37	20_24067381_T_TA_b37	Independent	5.63974	NaN	NaN	-1.39622	-2.17173	-0.620715	0.420537	0.21923	0.621845	-0.975685	NaN	NaN
ADPSBQ	ENSG00000100997.14	20_25275056_G_C_b37	20_25533740_G_T_b37	Independent	5.47227	NaN	NaN	0.128224	0.0613545	0.195094	-0.457089	-0.671476	-0.242702	-0.328865	NaN	NaN
ADPSBQ	ENSG00000130684.9	20_25529845_AC_A_b37	20_25632260_C_CTTCA_b37	Independent	5.63121	NaN	NaN	-0.279936	-0.360329	-0.199542	-0.612501	-0.891922	-0.33308	-0.892436	NaN	NaN
ADPSBQ	ENSG00000101361.10	20_2638459_T_C_b37	20_2652642_C_G_b37	Independent	5.51532	NaN	NaN	0.218021	0.142007	0.294035	-0.0965283	-0.142476	-0.0505807	0.121493	NaN	NaN
ADPSBQ	ENSG00000260257.1	20_31440228_G_A_b37	20_31442638_C_T_b37	Independent	5.64897	NaN	NaN	-0.334064	-0.433082	-0.235045	-0.266647	-0.371096	-0.162199	-0.600711	NaN	NaN
ADPSBQ	ENSG00000088899.10	20_3150387_C_T_b37	20_4053019_AC_A_b37	Independent	2.92835	NaN	NaN	0.248558	0.128374	0.368741	-1.0808	-1.84459	-0.317001	-0.832238	NaN	NaN
ADPSBQ	ENSG00000215529.8	20_31514405_C_T_b37	20_31448648_A_G_b37	Independent	5.65599	NaN	NaN	-2.70077	-4.98977	-0.411761	-2.00685	-3.96303	-0.0506732	-4.70762	NaN	NaN
ADPSBQ	ENSG00000100991.7	20_33668345_A_AAC_b37	20_33570007_T_C_b37	Independent	5.58725	NaN	NaN	-0.131213	-0.204664	-0.0577625	-0.148853	-0.225539	-0.0721678	-0.280067	NaN	NaN
ADPSBQ	ENSG00000126005.11	20_33841037_G_A_b37	20_33874720_C_T_b37	Independent	0.283141	NaN	NaN	-1.24685	-1.50347	-0.990231	-0.237372	-0.312969	-0.161775	-1.48422	NaN	NaN
ADPSBQ	ENSG00000101363.8	20_35945174_G_T_b37	20_35945396_A_G_b37	Independent	3.34182	NaN	NaN	-0.0841773	-0.126955	-0.0413999	0.120035	0.0729487	0.167122	0.0358582	NaN	NaN
ADPSBQ	ENSG00000198959.7	20_36743327_A_C_b37	20_36806173_C_T_b37	Independent	5.3878	NaN	NaN	0.69862	0.449787	0.947453	-0.561847	-0.769589	-0.354106	0.136773	NaN	NaN
ADPSBQ	ENSG00000196756.7	20_37053583_C_T_b37	20_37063671_C_T_b37	Independent	5.68698	NaN	NaN	-0.877918	-0.953726	-0.80211	0.222223	0.151235	0.29321	-0.655695	NaN	NaN
ADPSBQ	ENSG00000101224.13	20_3776368_T_C_b37	20_3791494_A_C_b37	Independent	-0.0766524	-18.9041	5.58717	0.375979	0.293341	0.458618	-0.192099	-0.275249	-0.108949	0.18388	NaN	NaN
ADPSBQ	ENSG00000025772.7	20_42825929_C_T_b37	20_43589041_G_A_b37	Independent	5.5409	NaN	NaN	-0.455827	-0.532528	-0.379125	-0.195877	-0.2889	-0.102854	-0.651703	NaN	NaN
ADPSBQ	ENSG00000223891.1	20_42847766_A_G_b37	20_42840019_A_G_b37	Independent	5.68358	NaN	NaN	0.355439	0.26662	0.444258	0.509906	0.372683	0.647129	0.865345	NaN	NaN
ADPSBQ	ENSG00000124257.6	20_44632367_G_A_b37	20_44626930_G_A_b37	Independent	5.69373	NaN	NaN	0.784387	0.543945	1.02483	0.990243	0.653616	1.32687	1.77463	NaN	NaN
ADPSBQ	ENSG00000231742.1	20_48789745_T_C_b37	20_48788145_C_T_b37	Independent	0.792031	NaN	NaN	0.964349	0.766312	1.16239	0.595241	0.349838	0.840645	1.55959	NaN	NaN
ADPSBQ	ENSG00000182463.11	20_50999627_T_C_b37	20_51873712_T_C_b37	Independent	5.63794	NaN	NaN	0.274665	0.184416	0.364915	0.285637	0.16087	0.410404	0.560302	NaN	NaN
ADPSBQ	ENSG00000228340.1	20_58713855_G_A_b37	20_58661234_A_G_b37	Independent	4.24736	NaN	NaN	-0.579816	-0.864922	-0.29471	0.883689	0.552533	1.21484	0.303872	NaN	NaN
ADPSBQ	ENSG00000060491.12	20_61452837_G_A_b37	20_61444629_A_G_b37	Independent	5.34234	NaN	NaN	-0.279946	-0.373201	-0.186691	0.200641	0.113718	0.287564	-0.0793055	NaN	NaN
ADPSBQ	ENSG00000101191.12	20_61571208_C_A_b37	20_62150018_G_A_b37	Independent	4.08722	NaN	NaN	0.135368	0.1015	0.169236	0.171933	0.0970146	0.246852	0.307301	NaN	NaN
ADPSBQ	ENSG00000125510.11	20_62695931_G_A_b37	20_62786860_A_G_b37	Independent	-0.398208	-23.9816	5.67675	0.403875	0.273236	0.534515	0.952046	0.570905	1.33319	1.35592	NaN	NaN
ADPSBQ	ENSG00000171703.12	20_62698844_GCTGGA_G_b37	20_62688877_C_G_b37	Independent	5.42244	NaN	NaN	0.148468	0.0846184	0.212318	-0.106616	-0.167722	-0.04551	0.0418519	NaN	NaN
ADPSBQ	ENSG00000203880.7	20_62900380_T_G_b37	20_62838806_G_T_b37	Independent	2.85084	NaN	NaN	-0.246172	-0.295915	-0.19643	0.218853	0.147661	0.290044	-0.0273193	NaN	NaN
ADPSBQ	ENSG00000101282.4	20_999102_AG_A_b37	20_1019132_T_G_b37	Independent	5.49717	NaN	NaN	-0.948088	-1.2143	-0.681877	-2.55585	-3.55203	-1.55968	-3.50394	NaN	NaN
ADPSBQ	ENSG00000231236.2	21_29537588_A_G_b37	21_28541532_G_A_b37	Independent	5.38337	NaN	NaN	0.869342	0.582919	1.15576	-1.34247	-3.0018	0.316868	-0.473125	NaN	NaN
ADPSBQ	ENSG00000159110.15	21_34654034_T_C_b37	21_34631133_A_G_b37	Independent	5.65131	NaN	NaN	0.197903	0.14172	0.254086	-0.189108	-0.24873	-0.129486	0.008795	NaN	NaN
ADPSBQ	ENSG00000243646.4	21_34659396_A_G_b37	21_34638031_C_T_b37	Independent	5.19263	NaN	NaN	0.138872	0.0842965	0.193447	0.141086	0.068405	0.213766	0.279957	NaN	NaN
ADPSBQ	ENSG00000142166.8	21_34699107_AC_A_b37	21_34737449_T_A_b37	Independent	5.5082	NaN	NaN	-0.218672	-0.281814	-0.15553	0.129856	0.0748789	0.184833	-0.0888163	NaN	NaN
ADPSBQ	ENSG00000214914.3	21_36471524_G_C_b37	21_37377631_G_A_b37	Independent	5.03056	NaN	NaN	1.09662	0.913094	1.28015	-0.813824	-1.2118	-0.415844	0.282796	NaN	NaN
ADPSBQ	ENSG00000231106.2	21_37437249_T_C_b37	21_37377631_G_A_b37	Independent	5.27159	NaN	NaN	2.08397	1.81609	2.35185	0.676458	0.304761	1.04816	2.76043	NaN	NaN
ADPSBQ	ENSG00000159263.11	21_38338049_T_G_b37	21_38961827_G_A_b37	Independent	0.309779	NaN	NaN	-0.278972	-0.473702	-0.0842416	0.504686	0.146077	0.863294	0.225714	NaN	NaN
ADPSBQ	ENSG00000183527.7	21_41088009_G_C_b37	21_40711959_G_A_b37	Independent	5.60298	NaN	NaN	-0.253432	-0.311291	-0.195572	-0.327975	-0.514704	-0.141246	-0.581406	NaN	NaN
ADPSBQ	ENSG00000141956.9	21_43221111_G_A_b37	21_43263742_G_A_b37	Independent	2.5776	NaN	NaN	0.504355	0.38028	0.62843	0.234707	0.139388	0.330026	0.739062	NaN	NaN
ADPSBQ	ENSG00000235772.1	21_43981658_G_A_b37	21_43981941_C_T_b37	Independent	5.65948	NaN	NaN	-1.63168	-1.9387	-1.32465	-0.703402	-0.896059	-0.510744	-2.33508	NaN	NaN
ADPSBQ	ENSG00000160194.13	21_44356460_C_T_b37	21_44323720_C_T_b37	Independent	5.48894	NaN	NaN	-0.913906	-1.0682	-0.759615	0.152053	0.0951785	0.208928	-0.761853	NaN	NaN
ADPSBQ	ENSG00000160226.11	21_45753891_C_T_b37	21_45757631_G_A_b37	Independent	4.63216	NaN	NaN	0.385906	0.318956	0.452856	-0.207506	-0.287903	-0.127108	0.1784	NaN	NaN
ADPSBQ	ENSG00000184441.4	21_45760630_TTC_T_b37	21_45744982_C_G_b37	Independent	3.28416	NaN	NaN	0.390619	0.305923	0.475315	-0.338562	-0.444336	-0.232788	0.0520566	NaN	NaN
ADPSBQ	ENSG00000215424.5	21_47691745_G_A_b37	21_47698343_G_A_b37	Independent	5.65948	NaN	NaN	0.981329	0.825581	1.13708	0.188948	0.108084	0.269813	1.17028	NaN	NaN
ADPSBQ	ENSG00000235878.4	21_47891525_A_C_b37	21_47617489_T_G_b37	Independent	5.54193	NaN	NaN	-0.571792	-0.731714	-0.41187	0.270666	0.147591	0.393741	-0.301126	NaN	NaN
ADPSBQ	ENSG00000160305.13	21_47980800_C_T_b37	21_47966016_C_G_b37	Independent	4.88981	NaN	NaN	-0.216771	-0.306565	-0.126977	-0.129154	-0.193272	-0.0650364	-0.345925	NaN	NaN
ADPSBQ	ENSG00000100181.17	22_17078851_GA_G_b37	22_17089569_A_G_b37	Independent	5.10595	NaN	NaN	1.57462	0.752354	2.39688	-0.585527	-1.09895	-0.0721	0.989092	NaN	NaN
ADPSBQ	ENSG00000237438.2	22_17538082_C_A_b37	22_17497295_G_A_b37	Independent	5.27138	NaN	NaN	-1.25549	-1.41218	-1.0988	0.499592	0.331556	0.667628	-0.755896	NaN	NaN
ADPSBQ	ENSG00000093072.11	22_17699642_T_C_b37	22_17685194_T_A_b37	Independent	1.1214	NaN	NaN	0.965281	0.828957	1.1016	0.254543	0.114513	0.394572	1.21982	NaN	NaN
ADPSBQ	ENSG00000099954.14	22_17883957_G_T_b37	22_17958623_C_CCT_b37	Independent	5.37855	NaN	NaN	0.766309	0.504959	1.02766	-0.845176	-1.19242	-0.497933	-0.0788671	NaN	NaN
ADPSBQ	ENSG00000183628.8	22_18893248_G_A_b37	22_18895875_A_T_b37	Independent	5.62762	NaN	NaN	-2.24941	-2.63198	-1.86683	-0.516484	-0.65084	-0.382128	-2.76589	NaN	NaN
ADPSBQ	ENSG00000070371.11	22_19285361_G_T_b37	22_19279558_C_T_b37	Independent	5.66296	NaN	NaN	-0.308519	-0.438108	-0.17893	0.280549	0.150422	0.410675	-0.0279704	NaN	NaN
ADPSBQ	ENSG00000184702.13	22_19676393_G_A_b37	22_19679067_A_G_b37	Independent	5.69036	NaN	NaN	0.417878	0.271504	0.564252	0.385379	0.234854	0.535904	0.803257	NaN	NaN
ADPSBQ	ENSG00000184470.15	22_19867771_C_T_b37	22_19836148_C_T_b37	Independent	5.63845	NaN	NaN	-0.393497	-0.499047	-0.287947	0.250545	0.137084	0.364005	-0.142953	NaN	NaN
ADPSBQ	ENSG00000100075.5	22_20148594_A_G_b37	22_19180652_T_TCA_b37	Independent	5.60156	NaN	NaN	-0.355462	-0.45736	-0.253564	0.303694	-0.094634	0.702023	-0.0517678	NaN	NaN
ADPSBQ	ENSG00000099940.7	22_21105343_T_C_b37	22_21224023_A_G_b37	Independent	5.54388	NaN	NaN	0.212317	0.176713	0.247921	-0.206841	-0.306883	-0.106799	0.00547606	NaN	NaN
ADPSBQ	ENSG00000099949.14	22_21336549_A_T_b37	22_21353328_G_A_b37	Independent	5.6072	NaN	NaN	-0.159227	-0.198743	-0.119712	-0.134301	-0.173059	-0.0955436	-0.293529	NaN	NaN
ADPSBQ	ENSG00000230513.1	22_21356824_G_A_b37	22_21344905_A_G_b37	Independent	-1.48679	-35.0087	5.64778	-2.33431	-2.51332	-2.1553	0.448859	0.330486	0.567231	-1.88545	NaN	NaN
ADPSBQ	ENSG00000100038.15	22_22304943_G_A_b37	22_22302670_GCCAC_G_b37	Independent	5.64191	NaN	NaN	-0.495032	-0.590503	-0.39956	-0.163734	-0.234833	-0.0926345	-0.658765	NaN	NaN
ADPSBQ	ENSG00000211643.2	22_22694294_A_G_b37	22_22637045_C_T_b37	Independent	2.92961	NaN	NaN	-0.794505	-1.02408	-0.564933	0.416166	0.204987	0.627345	-0.378339	NaN	NaN
ADPSBQ	ENSG00000218537.1	22_24243736_C_T_b37	22_24266954_A_C_b37	Independent	5.42268	NaN	NaN	3.41181	3.20477	3.61885	-0.421535	-0.622127	-0.220942	2.99028	NaN	NaN
ADPSBQ	ENSG00000099977.9	22_24266954_A_C_b37	22_24314006_G_T_b37	Independent	3.31026	NaN	NaN	0.664302	0.52996	0.798643	-0.437443	-0.577084	-0.297802	0.226859	NaN	NaN
ADPSBQ	ENSG00000272955.1	22_24339634_A_C_b37	22_24265659_C_T_b37	Independent	3.99965	NaN	NaN	2.26787	1.97659	2.55914	-1.83024	-2.48786	-1.17262	0.437624	NaN	NaN
ADPSBQ	ENSG00000235231.3	22_24401004_G_C_b37	22_24259772_C_G_b37	Independent	3.78686	NaN	NaN	3.71896	3.25687	4.18105	0.497723	-1.71137	2.70682	4.21668	NaN	NaN
ADPSBQ	ENSG00000100024.10	22_24878218_T_C_b37	22_25145753_G_A_b37	Independent	5.62867	NaN	NaN	-0.675992	-0.841941	-0.510043	-1.11686	-1.6397	-0.594017	-1.79285	NaN	NaN
ADPSBQ	ENSG00000100099.16	22_27382785_A_G_b37	22_26854786_C_CG_b37	Independent	5.4504	NaN	NaN	0.104714	0.0618469	0.147582	0.263995	0.130452	0.397539	0.36871	NaN	NaN
ADPSBQ	ENSG00000100276.9	22_29793835_A_G_b37	22_29758488_A_G_b37	Independent	5.59052	NaN	NaN	-1.16191	-1.54182	-0.782003	0.719202	0.378671	1.05973	-0.442709	NaN	NaN
ADPSBQ	ENSG00000128242.8	22_31018124_A_G_b37	22_30961645_C_T_b37	Independent	5.46321	NaN	NaN	-0.951699	-1.436	-0.467401	0.88514	0.504549	1.26573	-0.0665591	NaN	NaN
ADPSBQ	ENSG00000167065.9	22_31063804_GT_G_b37	22_31053658_G_A_b37	Independent	5.20934	NaN	NaN	-0.296153	-0.403901	-0.188406	-0.356887	-0.50217	-0.211604	-0.65304	NaN	NaN
ADPSBQ	ENSG00000198089.10	22_32023503_CAG_C_b37	22_32002294_T_C_b37	Independent	5.65599	NaN	NaN	0.229807	0.148855	0.31076	0.226634	0.113642	0.339626	0.456441	NaN	NaN
ADPSBQ	ENSG00000214076.3	22_32747487_A_G_b37	22_32744045_C_T_b37	Independent	5.66296	NaN	NaN	1.36068	0.987878	1.73348	-0.897406	-1.2546	-0.540209	0.463274	NaN	NaN
ADPSBQ	ENSG00000205853.6	22_32782172_C_CT_b37	22_32665789_C_T_b37	Independent	2.77296	NaN	NaN	-0.722491	-0.980242	-0.464739	0.390638	0.216047	0.565228	-0.331853	NaN	NaN
ADPSBQ	ENSG00000133466.9	22_37594605_C_G_b37	22_37588820_A_G_b37	Independent	5.68358	NaN	NaN	-1.24405	-2.03354	-0.454564	0.274895	0.134709	0.415082	-0.969155	NaN	NaN
ADPSBQ	ENSG00000234688.1	22_37730755_G_A_b37	22_37102256_T_C_b37	Independent	4.91776	NaN	NaN	0.463551	0.142806	0.784295	-0.260912	-0.57713	0.0553066	0.202639	NaN	NaN
ADPSBQ	ENSG00000128298.12	22_37960365_G_A_b37	22_38587738_G_A_b37	Independent	4.42918	NaN	NaN	0.715424	0.457228	0.973619	-0.379312	-0.518552	-0.240072	0.336112	NaN	NaN
ADPSBQ	ENSG00000100211.6	22_38322138_A_C_b37	22_39044536_C_T_b37	Independent	4.98511	NaN	NaN	-0.251241	-0.302283	-0.200199	-0.522799	-0.827736	-0.217862	-0.77404	NaN	NaN
ADPSBQ	ENSG00000243811.3	22_39426281_C_T_b37	22_39414766_C_T_b37	Independent	4.55535	NaN	NaN	-0.563877	-0.718512	-0.409242	0.26576	0.126044	0.405477	-0.298116	NaN	NaN
ADPSBQ	ENSG00000196236.8	22_41256802_A_G_b37	22_41208362_T_C_b37	Independent	5.44166	NaN	NaN	0.312901	0.244379	0.381423	-0.133452	-0.204358	-0.0625459	0.179449	NaN	NaN
ADPSBQ	ENSG00000100418.7	22_41595114_CTATT_C_b37	22_41987914_A_T_b37	Independent	5.66988	NaN	NaN	-0.113828	-0.15857	-0.069086	-0.68831	-0.990338	-0.386282	-0.802138	NaN	NaN
ADPSBQ	ENSG00000184983.5	22_42551839_C_T_b37	22_42484466_G_A_b37	Independent	5.66296	NaN	NaN	0.852847	0.781083	0.924612	0.100266	0.0597411	0.140791	0.953113	NaN	NaN
ADPSBQ	ENSG00000183569.13	22_43348749_A_G_b37	22_43011674_T_C_b37	Independent	5.58845	NaN	NaN	-0.501998	-0.700038	-0.303957	-1.8536	-3.62724	-0.0799636	-2.3556	NaN	NaN
ADPSBQ	ENSG00000100304.12	22_43583598_T_C_b37	22_44577150_G_T_b37	Independent	5.21222	NaN	NaN	-0.288986	-0.359644	-0.218329	0.418346	0.22684	0.609852	0.12936	NaN	NaN
ADPSBQ	ENSG00000100347.10	22_44356480_G_T_b37	22_44325631_C_T_b37	Independent	5.68358	NaN	NaN	-0.453781	-0.529262	-0.3783	0.109535	0.0526129	0.166456	-0.344246	NaN	NaN
ADPSBQ	ENSG00000100376.7	22_45723116_A_G_b37	22_45719497_C_G_b37	Independent	3.83154	NaN	NaN	-2.34394	-2.44541	-2.24246	-0.37021	-0.48003	-0.26039	-2.71415	NaN	NaN
ADPSBQ	ENSG00000130638.11	22_46157281_T_C_b37	22_47024372_G_A_b37	Independent	5.34432	NaN	NaN	-0.100608	-0.140907	-0.0603084	0.14805	0.0479753	0.248124	0.0474418	NaN	NaN
ADPSBQ	ENSG00000075234.12	22_46691400_T_C_b37	22_46733657_T_C_b37	Independent	2.48696	NaN	NaN	1.10856	0.976221	1.24091	-0.844162	-1.08489	-0.603437	0.264403	NaN	NaN
ADPSBQ	ENSG00000025708.8	22_50635628_G_C_b37	22_50957462_C_T_b37	Independent	4.41311	NaN	NaN	0.430298	0.270537	0.590059	0.725239	0.375292	1.07519	1.15554	NaN	NaN
ADPSBQ	ENSG00000205560.8	22_51018579_A_G_b37	22_51017394_G_C_b37	Independent	5.69373	NaN	NaN	0.28606	0.190362	0.381757	-0.611294	-0.877986	-0.344602	-0.325235	NaN	NaN
ADPSBQ	ENSG00000100288.15	22_51021599_C_T_b37	22_51025741_C_T_b37	Independent	5.68358	NaN	NaN	0.20134	0.154072	0.248608	0.40227	0.223667	0.580873	0.60361	NaN	NaN
ADPSBQ	ENSG00000256628.2	3_101441900_A_C_b37	3_101367909_C_T_b37	Independent	-1.78076	-29.033	5.57215	-0.262095	-0.363496	-0.160695	-0.617196	-0.827585	-0.406806	-0.879291	NaN	NaN
ADPSBQ	ENSG00000157103.6	3_11030953_C_G_b37	3_11020033_A_G_b37	Independent	2.94805	NaN	NaN	1.04317	0.837809	1.24853	-1.37514	-1.75126	-0.999025	-0.331976	NaN	NaN
ADPSBQ	ENSG00000272761.1	3_112206877_T_C_b37	3_112366816_G_A_b37	Independent	5.38596	NaN	NaN	-0.391119	-0.569102	-0.213137	1.05674	0.463557	1.64992	0.665622	NaN	NaN
ADPSBQ	ENSG00000178075.15	3_112898228_CAT_C_b37	3_113549651_C_T_b37	Independent	4.45877	NaN	NaN	0.463516	0.333563	0.593468	-0.587668	-0.942693	-0.232643	-0.124153	NaN	NaN
ADPSBQ	ENSG00000163611.7	3_113288430_G_A_b37	3_113137595_C_T_b37	Independent	4.81264	NaN	NaN	0.501979	0.309305	0.694652	-0.11626	-0.178807	-0.0537128	0.385719	NaN	NaN
ADPSBQ	ENSG00000259976.1	3_114630938_A_G_b37	3_113368375_C_A_b37	Independent	5.66296	NaN	NaN	0.694274	0.355346	1.0332	0.314183	0.1351	0.493265	1.00846	NaN	NaN
ADPSBQ	ENSG00000242052.1	3_118709657_A_AT_b37	3_119355359_TTC_T_b37	Independent	5.55008	NaN	NaN	-0.849385	-1.1516	-0.547169	0.441198	0.242109	0.640287	-0.408187	NaN	NaN
ADPSBQ	ENSG00000144559.6	3_11888556_G_T_b37	3_11864427_G_A_b37	Independent	5.35899	NaN	NaN	-0.338804	-0.390571	-0.287038	-0.236916	-0.293371	-0.180462	-0.575721	NaN	NaN
ADPSBQ	ENSG00000163389.6	3_119206620_C_T_b37	3_119191398_T_C_b37	Independent	5.68358	NaN	NaN	0.505221	0.403145	0.607296	-0.212787	-0.26931	-0.156265	0.292433	NaN	NaN
ADPSBQ	ENSG00000144843.7	3_119303054_C_CT_b37	3_119300655_G_A_b37	Independent	5.67332	NaN	NaN	-0.879394	-1.06363	-0.695157	-0.335087	-0.474613	-0.195561	-1.21448	NaN	NaN
ADPSBQ	ENSG00000138495.2	3_119362318_A_G_b37	3_119338492_G_A_b37	Independent	1.56702	NaN	NaN	-0.219331	-0.284613	-0.154049	-0.17061	-0.258004	-0.0832169	-0.389941	NaN	NaN
ADPSBQ	ENSG00000272758.1	3_121351315_G_GGGCTCAGGCTCA_b37	3_122131777_C_G_b37	Independent	5.51391	NaN	NaN	0.456069	0.333041	0.579097	0.358572	0.21696	0.500185	0.814641	NaN	NaN
ADPSBQ	ENSG00000180353.6	3_121360227_T_C_b37	3_121360892_A_C_b37	Independent	5.65948	NaN	NaN	-0.351257	-0.486269	-0.216245	-0.260948	-0.374964	-0.146933	-0.612205	NaN	NaN
ADPSBQ	ENSG00000169087.6	3_122508758_G_GA_b37	3_122471986_C_G_b37	Independent	5.11688	NaN	NaN	-0.319836	-0.385253	-0.254419	-0.161436	-0.216006	-0.106865	-0.481271	NaN	NaN
ADPSBQ	ENSG00000121542.7	3_122944937_G_A_b37	3_122983341_ACT_A_b37	Independent	5.65249	NaN	NaN	-0.274751	-0.348953	-0.200549	0.183504	0.126163	0.240845	-0.0912469	NaN	NaN
ADPSBQ	ENSG00000241288.3	3_125631771_G_A_b37	3_125650064_G_C_b37	Independent	-0.195474	-23.8938	5.47029	-1.47984	-1.83241	-1.12727	0.590338	0.24458	0.936097	-0.8895	NaN	NaN
ADPSBQ	ENSG00000180767.5	3_126249265_G_A_b37	3_126244850_T_C_b37	Independent	5.67676	NaN	NaN	-0.998853	-1.29163	-0.706074	-1.21084	-1.57975	-0.841938	-2.2097	NaN	NaN
ADPSBQ	ENSG00000187715.9	3_127622027_G_T_b37	3_127624215_C_T_b37	Independent	5.33076	NaN	NaN	0.725462	0.508434	0.94249	-1.59601	-2.69402	-0.498007	-0.870551	NaN	NaN
ADPSBQ	ENSG00000075785.8	3_129064469_C_T_b37	3_128521508_G_A_b37	Independent	5.16546	NaN	NaN	-0.156391	-0.254094	-0.0586883	0.0568331	0.0277292	0.085937	-0.0995578	NaN	NaN
ADPSBQ	ENSG00000228252.4	3_129843829_C_CTT_b37	3_129803791_T_TTTTA_b37	Independent	-2.21649	-47.5193	4.56157	-1.41951	-1.97792	-0.861093	-1.11896	-1.81682	-0.421109	-2.53847	NaN	NaN
ADPSBQ	ENSG00000091513.10	3_133466457_T_A_b37	3_133470025_A_G_b37	Independent	5.66974	NaN	NaN	2.14394	1.73828	2.54961	-1.99604	-3.17732	-0.814754	0.147906	NaN	NaN
ADPSBQ	ENSG00000154917.6	3_133591883_G_A_b37	3_133651007_C_A_b37	Independent	4.64333	NaN	NaN	-1.11063	-1.75427	-0.466988	-0.444742	-0.640657	-0.248828	-1.55537	NaN	NaN
ADPSBQ	ENSG00000174640.8	3_133638227_G_C_b37	3_134215493_A_G_b37	Independent	5.66643	NaN	NaN	1.44882	0.820672	2.07697	0.949782	0.569509	1.33006	2.3986	NaN	NaN
ADPSBQ	ENSG00000129055.8	3_134205227_C_T_b37	3_134271749_G_A_b37	Independent	5.68698	NaN	NaN	0.494345	0.449197	0.539493	0.296116	0.15715	0.435083	0.790461	NaN	NaN
ADPSBQ	ENSG00000118017.3	3_137851198_T_C_b37	3_137827367_C_T_b37	Independent	5.69056	NaN	NaN	1.44671	1.1929	1.70052	1.36991	1.00992	1.7299	2.81662	NaN	NaN
ADPSBQ	ENSG00000272656.1	3_139099867_G_A_b37	3_138988101_G_A_b37	Independent	4.85359	NaN	NaN	-0.693507	-0.890407	-0.496607	-0.484621	-0.703884	-0.265358	-1.17813	NaN	NaN
ADPSBQ	ENSG00000241679.2	3_143237419_T_C_b37	3_142844453_G_A_b37	Independent	4.92965	NaN	NaN	-0.653315	-0.849618	-0.457012	0.53181	0.262271	0.801348	-0.121506	NaN	NaN
ADPSBQ	ENSG00000114698.10	3_145947157_T_C_b37	3_145917761_T_C_b37	Independent	5.49311	NaN	NaN	0.391239	0.311963	0.470515	-0.164721	-0.246534	-0.082909	0.226518	NaN	NaN
ADPSBQ	ENSG00000169903.6	3_149199066_G_GGGAAGAGGA_b37	3_149124061_G_A_b37	Independent	5.47083	NaN	NaN	0.53438	0.30108	0.767681	-6.64383	-63.5384	50.2507	-6.10945	NaN	NaN
ADPSBQ	ENSG00000225733.1	3_14977206_A_C_b37	3_14979954_T_A_b37	Independent	5.59471	NaN	NaN	-0.087074	-0.139887	-0.0342611	0.143074	0.0748138	0.211333	0.0559996	NaN	NaN
ADPSBQ	ENSG00000244515.1	3_156883696_G_A_b37	3_156842653_A_G_b37	Independent	5.13653	NaN	NaN	-1.19355	-1.50138	-0.885714	0.669876	0.384993	0.954759	-0.523671	NaN	NaN
ADPSBQ	ENSG00000118855.14	3_158489087_A_G_b37	3_158539739_A_G_b37	Independent	5.68017	NaN	NaN	-0.738052	-0.980445	-0.495659	-0.148898	-0.197938	-0.0998566	-0.88695	NaN	NaN
ADPSBQ	ENSG00000224660.1	3_16249076_C_G_b37	3_15295158_A_G_b37	Independent	-4.20251	-26.1709	5.52943	0.445349	0.348946	0.541751	-0.423856	-0.726005	-0.121708	0.0214925	NaN	NaN
ADPSBQ	ENSG00000114200.5	3_165556753_C_T_b37	3_165546716_A_C_b37	Independent	5.63479	NaN	NaN	-1.06312	-1.42189	-0.704354	-1.83626	-2.83855	-0.833974	-2.89939	NaN	NaN
ADPSBQ	ENSG00000244227.1	3_167544484_C_T_b37	3_167605050_ATGT_A_b37	Independent	5.6147	NaN	NaN	-0.605438	-0.88466	-0.326216	0.786929	0.453802	1.12006	0.181491	NaN	NaN
ADPSBQ	ENSG00000075651.11	3_171504273_G_A_b37	3_171500490_A_C_b37	Independent	5.62344	NaN	NaN	-0.233052	-0.318863	-0.147241	-0.233142	-0.335382	-0.130902	-0.466194	NaN	NaN
ADPSBQ	ENSG00000171109.14	3_179127619_AAC_A_b37	3_179033604_G_A_b37	Independent	2.72328	NaN	NaN	0.145856	0.0987008	0.19301	-0.069964	-0.112642	-0.0272864	0.0758916	NaN	NaN
ADPSBQ	ENSG00000156931.11	3_184529990_C_G_b37	3_184555231_A_G_b37	Independent	5.11388	NaN	NaN	0.361021	0.276075	0.445966	0.143816	0.0934829	0.194149	0.504837	NaN	NaN
ADPSBQ	ENSG00000163918.6	3_186497254_C_T_b37	3_185699853_T_C_b37	Independent	5.32366	NaN	NaN	-0.240318	-0.319329	-0.161307	0.336978	0.182983	0.490972	0.0966599	NaN	NaN
ADPSBQ	ENSG00000231770.1	3_194307659_C_T_b37	3_194310359_G_A_b37	Independent	-7.62472	-30.5999	4.93691	0.53818	0.413097	0.663264	0.249647	0.158716	0.340578	0.787827	NaN	NaN
ADPSBQ	ENSG00000224769.1	3_195666636_T_C_b37	3_195338127_A_G_b37	Independent	-4.30765	-23.8461	5.17049	1.59434	1.30755	1.88113	0.836761	0.523796	1.14973	2.4311	NaN	NaN
ADPSBQ	ENSG00000215837.7	3_195670231_T_C_b37	3_195738482_A_G_b37	Independent	5.59099	NaN	NaN	-1.42246	-1.8381	-1.00682	0.50832	0.299108	0.717532	-0.914136	NaN	NaN
ADPSBQ	ENSG00000145113.17	3_195726869_C_T_b37	3_195477088_A_G_b37	Independent	-2.39974	-22.2849	5.60868	-1.375	-1.65968	-1.09033	1.75118	1.36952	2.13284	0.376179	NaN	NaN
ADPSBQ	ENSG00000185485.10	3_195733814_G_C_b37	3_195476501_A_C_b37	Independent	3.64579	NaN	NaN	0.347466	0.221287	0.473644	0.163516	0.0491	0.277932	0.510981	NaN	NaN
ADPSBQ	ENSG00000163959.5	3_195944531_G_A_b37	3_195961254_C_T_b37	Independent	5.13506	NaN	NaN	-0.371338	-0.467397	-0.27528	-0.170827	-0.256133	-0.0855205	-0.542165	NaN	NaN
ADPSBQ	ENSG00000213519.2	3_197306177_A_G_b37	3_197348638_G_A_b37	Independent	-2.44286	-13.1268	5.63121	-1.22733	-1.67862	-0.77604	-0.587945	-0.764151	-0.411739	-1.81528	NaN	NaN
ADPSBQ	ENSG00000163576.13	3_19987539_G_T_b37	3_20620498_A_G_b37	Independent	-2.90303	-31.1277	5.69373	3.32049	3.17137	3.46961	0.992408	0.380129	1.60469	4.3129	NaN	NaN
ADPSBQ	ENSG00000170275.10	3_33174156_T_G_b37	3_33155385_T_C_b37	Independent	3.64175	NaN	NaN	0.271594	0.214249	0.328939	-0.104575	-0.150083	-0.0590673	0.167019	NaN	NaN
ADPSBQ	ENSG00000076242.10	3_37092173_GTTC_G_b37	3_37034946_G_A_b37	Independent	5.69373	NaN	NaN	0.134554	0.0842648	0.184843	-0.321429	-0.479591	-0.163267	-0.186875	NaN	NaN
ADPSBQ	ENSG00000168356.7	3_38964155_AAAG_A_b37	3_38985661_T_C_b37	Independent	5.68017	NaN	NaN	-0.748021	-1.09281	-0.403231	1.39641	0.979684	1.81313	0.648386	NaN	NaN
ADPSBQ	ENSG00000188846.9	3_40319345_A_G_b37	3_40510124_ATATGT_A_b37	Independent	5.63121	NaN	NaN	0.272084	0.188955	0.355214	-0.0852141	-0.128022	-0.0424062	0.18687	NaN	NaN
ADPSBQ	ENSG00000114857.13	3_42557199_C_T_b37	3_42697605_G_C_b37	Independent	5.07953	NaN	NaN	-0.284954	-0.334459	-0.235449	-0.126768	-0.19281	-0.0607252	-0.411722	NaN	NaN
ADPSBQ	ENSG00000196653.7	3_44759389_C_T_b37	3_44883971_G_A_b37	Independent	5.2679	NaN	NaN	0.215837	0.14249	0.289184	0.235671	0.146591	0.324751	0.451508	NaN	NaN
ADPSBQ	ENSG00000144455.9	3_4522131_A_G_b37	3_4403537_C_T_b37	Independent	4.55706	NaN	NaN	-0.553824	-0.610004	-0.497644	-0.164257	-0.221011	-0.107503	-0.718081	NaN	NaN
ADPSBQ	ENSG00000172215.5	3_45267058_G_A_b37	3_46172903_A_G_b37	Independent	5.51556	NaN	NaN	0.566045	0.328572	0.803519	0.353406	0.148321	0.558491	0.919451	NaN	NaN
ADPSBQ	ENSG00000163820.10	3_45967869_C_T_b37	3_45962752_T_C_b37	Independent	5.69373	NaN	NaN	-0.232836	-0.291952	-0.173719	0.0895582	0.0345456	0.144571	-0.143277	NaN	NaN
ADPSBQ	ENSG00000164045.7	3_47649807_A_AC_b37	3_48323364_T_C_b37	Independent	3.8237	NaN	NaN	1.02998	0.859143	1.20082	1.30841	0.703062	1.91375	2.33839	NaN	NaN
ADPSBQ	ENSG00000164048.9	3_48292916_G_A_b37	3_48276077_A_T_b37	Independent	5.68018	NaN	NaN	0.581431	0.499147	0.663716	-0.829842	-1.25874	-0.400948	-0.248411	NaN	NaN
ADPSBQ	ENSG00000172113.4	3_48379787_CT_C_b37	3_48058980_T_TC_b37	Independent	5.6058	NaN	NaN	-0.252395	-0.317773	-0.187016	-0.394597	-0.615618	-0.173575	-0.646992	NaN	NaN
ADPSBQ	ENSG00000228638.1	3_48408264_TA_T_b37	3_48312658_T_C_b37	Independent	5.5924	NaN	NaN	-0.381392	-0.488291	-0.274492	0.43176	0.105201	0.758319	0.0503686	NaN	NaN
ADPSBQ	ENSG00000178252.13	3_48821036_C_T_b37	3_48960017_T_A_b37	Independent	5.69373	NaN	NaN	-0.492503	-0.544675	-0.440332	0.751462	0.676237	0.826687	0.258959	NaN	NaN
ADPSBQ	ENSG00000164068.11	3_49754970_T_C_b37	3_49843723_T_C_b37	Independent	5.2512	NaN	NaN	0.123058	0.0781587	0.167956	-0.0802787	-0.134618	-0.0259394	0.0427789	NaN	NaN
ADPSBQ	ENSG00000164082.10	3_51770429_C_T_b37	3_51509084_A_C_b37	Independent	5.66721	NaN	NaN	0.665999	0.467868	0.864131	-1.21607	-1.89156	-0.540586	-0.550075	NaN	NaN
ADPSBQ	ENSG00000179837.6	3_51790029_G_A_b37	3_51420421_A_C_b37	Independent	5.63835	NaN	NaN	0.0933125	0.0449014	0.141724	0.21376	0.118048	0.309471	0.307072	NaN	NaN
ADPSBQ	ENSG00000162244.6	3_52013883_A_G_b37	3_51994923_GGT_G_b37	Independent	5.52214	NaN	NaN	-0.314193	-0.357742	-0.270644	-0.315667	-0.410501	-0.220833	-0.62986	NaN	NaN
ADPSBQ	ENSG00000114779.15	3_52110089_C_T_b37	3_52094201_T_C_b37	Independent	5.66643	NaN	NaN	-0.295863	-0.486059	-0.105668	-0.289241	-0.461239	-0.117243	-0.585104	NaN	NaN
ADPSBQ	ENSG00000163935.9	3_53061377_T_C_b37	3_53410487_G_GTATT_b37	Independent	5.56168	NaN	NaN	-0.165547	-0.240913	-0.0901814	-0.135063	-0.210154	-0.0599733	-0.300611	NaN	NaN
ADPSBQ	ENSG00000180376.12	3_56579538_C_T_b37	3_56694742_A_G_b37	Independent	5.67675	NaN	NaN	-0.188327	-0.250005	-0.12665	-0.298522	-0.448284	-0.14876	-0.486849	NaN	NaN
ADPSBQ	ENSG00000189283.5	3_60598060_T_C_b37	3_61631516_A_G_b37	Independent	5.64756	NaN	NaN	1.14778	0.764452	1.53111	-0.845054	-1.24184	-0.448268	0.302726	NaN	NaN
ADPSBQ	ENSG00000172340.10	3_67458381_T_C_b37	3_67348023_G_A_b37	Independent	2.98628	NaN	NaN	0.11809	0.0705045	0.165675	0.0904606	0.0512663	0.129655	0.20855	NaN	NaN
ADPSBQ	ENSG00000172986.8	3_72918763_A_G_b37	3_73024609_A_T_b37	Independent	5.43772	NaN	NaN	0.469382	0.312511	0.626254	-0.478531	-0.655809	-0.301254	-0.00914898	NaN	NaN
ADPSBQ	ENSG00000242516.1	3_75803510_T_G_b37	3_75794494_T_C_b37	Independent	5.69373	NaN	NaN	-1.88475	-2.06251	-1.70698	2.47912	2.23095	2.72729	0.594374	NaN	NaN
ADPSBQ	ENSG00000070950.5	3_9005102_C_T_b37	3_8946852_T_A_b37	Independent	5.53502	NaN	NaN	-0.473499	-0.623292	-0.323705	-0.138953	-0.200907	-0.0769986	-0.612452	NaN	NaN
ADPSBQ	ENSG00000134077.11	3_9425911_G_A_b37	3_9406704_G_A_b37	Independent	5.6525	NaN	NaN	-0.152073	-0.196991	-0.107156	-0.246988	-0.310231	-0.183744	-0.399061	NaN	NaN
ADPSBQ	ENSG00000272777.1	4_100004620_G_A_b37	4_100244221_A_G_b37	Independent	5.40564	NaN	NaN	2.19557	1.94836	2.44279	-0.210656	-0.334941	-0.0863706	1.98492	NaN	NaN
ADPSBQ	ENSG00000196616.8	4_100122819_G_T_b37	4_100305393_A_G_b37	Independent	4.47951	NaN	NaN	-0.48564	-0.643244	-0.328036	-0.267799	-0.419471	-0.116127	-0.753439	NaN	NaN
ADPSBQ	ENSG00000261490.1	4_10076860_G_A_b37	4_10027643_A_G_b37	Independent	5.63835	NaN	NaN	0.567069	0.44416	0.689978	0.312992	0.190702	0.435281	0.880061	NaN	NaN
ADPSBQ	ENSG00000254531.1	4_102228696_T_G_b37	4_102268958_G_C_b37	Independent	5.65249	NaN	NaN	-0.392403	-0.465965	-0.31884	-0.803152	-0.996394	-0.609911	-1.19556	NaN	NaN
ADPSBQ	ENSG00000164039.10	4_104023840_A_G_b37	4_104020422_T_C_b37	Independent	5.41075	NaN	NaN	0.321629	0.259911	0.383347	0.188834	0.131366	0.246302	0.510463	NaN	NaN
ADPSBQ	ENSG00000138801.4	4_108661082_T_G_b37	4_108300026_C_T_b37	Independent	5.5114	NaN	NaN	0.250466	0.177243	0.323688	-0.14853	-0.213612	-0.0834473	0.101936	NaN	NaN
ADPSBQ	ENSG00000138658.11	4_113519249_T_TG_b37	4_113580912_T_G_b37	Independent	5.03625	NaN	NaN	-0.571743	-0.673262	-0.470224	0.284726	0.181833	0.387619	-0.287017	NaN	NaN
ADPSBQ	ENSG00000260404.2	4_120326819_T_C_b37	4_119519629_T_C_b37	Independent	5.4389	NaN	NaN	-0.392018	-0.467018	-0.317018	0.236942	0.161961	0.311923	-0.155076	NaN	NaN
ADPSBQ	ENSG00000164111.10	4_122596540_A_G_b37	4_122643740_A_G_b37	Independent	1.43363	NaN	NaN	-0.256368	-0.330571	-0.182165	0.131554	0.0686104	0.194498	-0.124814	NaN	NaN
ADPSBQ	ENSG00000196810.4	4_1271653_G_A_b37	4_1240299_T_G_b37	Independent	5.63835	NaN	NaN	-0.241888	-0.308862	-0.174914	-0.223753	-0.358435	-0.0890709	-0.465641	NaN	NaN
ADPSBQ	ENSG00000179979.7	4_1387298_A_G_b37	4_1332142_C_T_b37	Independent	-1.85696	-22.2	5.64898	1.28951	1.143	1.43601	-0.311085	-0.385112	-0.237057	0.978421	NaN	NaN
ADPSBQ	ENSG00000153147.5	4_144427624_G_GT_b37	4_144770075_A_T_b37	Independent	4.32981	NaN	NaN	0.0480446	0.0151376	0.0809516	0.157598	0.060965	0.25423	0.205642	NaN	NaN
ADPSBQ	ENSG00000245954.2	4_153093889_T_C_b37	4_153029413_G_A_b37	Independent	3.6733	NaN	NaN	-1.69469	-1.97169	-1.41769	-0.630205	-0.832869	-0.427541	-2.3249	NaN	NaN
ADPSBQ	ENSG00000250538.1	4_155917461_T_C_b37	4_155442866_C_T_b37	Independent	5.57585	NaN	NaN	0.642624	0.398297	0.88695	-0.501601	-0.748822	-0.25438	0.141023	NaN	NaN
ADPSBQ	ENSG00000250312.2	4_161165_A_G_b37	4_125987_T_C_b37	Independent	5.64191	NaN	NaN	1.07765	0.965057	1.19025	-0.46262	-0.576437	-0.348804	0.615034	NaN	NaN
ADPSBQ	ENSG00000145416.9	4_164447271_T_C_b37	4_164440090_G_T_b37	Independent	5.36772	NaN	NaN	-0.451989	-0.561151	-0.342828	-0.245493	-0.355534	-0.135451	-0.697482	NaN	NaN
ADPSBQ	ENSG00000109472.9	4_166064599_G_T_b37	4_166335181_C_A_b37	Independent	5.64591	NaN	NaN	0.303286	0.216873	0.389699	0.278982	0.158581	0.399382	0.582267	NaN	NaN
ADPSBQ	ENSG00000137601.11	4_170533736_G_T_b37	4_170146632_G_A_b37	Independent	3.63454	NaN	NaN	0.175807	0.0925325	0.259082	0.10533	0.0410465	0.169613	0.281137	NaN	NaN
ADPSBQ	ENSG00000251061.2	4_170694017_A_G_b37	4_171268389_T_C_b37	Independent	5.49506	NaN	NaN	-0.230173	-0.337236	-0.12311	0.812574	0.476641	1.14851	0.582401	NaN	NaN
ADPSBQ	ENSG00000109576.9	4_170971840_T_A_b37	4_170990750_G_A_b37	Independent	5.68698	NaN	NaN	-0.511874	-0.644079	-0.37967	-0.326666	-0.496858	-0.156474	-0.838541	NaN	NaN
ADPSBQ	ENSG00000270195.1	4_1723500_C_T_b37	4_2221808_A_G_b37	Independent	5.59804	NaN	NaN	-0.351432	-0.498866	-0.203999	-0.507584	-0.835473	-0.179695	-0.859016	NaN	NaN
ADPSBQ	ENSG00000248174.1	4_175040850_T_TG_b37	4_175035142_G_A_b37	Independent	5.64191	NaN	NaN	1.87745	1.57239	2.1825	-0.890503	-1.21554	-0.565467	0.986943	NaN	NaN
ADPSBQ	ENSG00000151552.7	4_17511949_G_T_b37	4_17506975_A_T_b37	Independent	5.43958	NaN	NaN	-0.253687	-0.349396	-0.157978	-0.199423	-0.277218	-0.121629	-0.45311	NaN	NaN
ADPSBQ	ENSG00000118579.7	4_17616537_C_T_b37	4_17613423_G_T_b37	Independent	5.6204	NaN	NaN	0.507556	0.385198	0.629915	0.0988392	0.0560038	0.141675	0.606396	NaN	NaN
ADPSBQ	ENSG00000068078.13	4_1797741_T_C_b37	4_1759974_G_A_b37	Independent	5.07282	NaN	NaN	-0.576923	-0.960577	-0.193269	0.852091	0.474404	1.22978	0.275168	NaN	NaN
ADPSBQ	ENSG00000129187.10	4_183826577_T_G_b37	4_183843452_A_G_b37	Independent	5.25958	NaN	NaN	0.174724	0.140542	0.208905	-0.167619	-0.230126	-0.105112	0.00710492	NaN	NaN
ADPSBQ	ENSG00000164305.13	4_185503889_T_TA_b37	4_185022324_A_T_b37	Independent	4.69927	NaN	NaN	0.220691	0.151938	0.289444	-0.274564	-0.449557	-0.0995714	-0.0538734	NaN	NaN
ADPSBQ	ENSG00000164306.6	4_185601511_T_G_b37	4_185423166_C_A_b37	Independent	5.62762	NaN	NaN	0.25432	0.128152	0.380488	-0.722334	-1.07406	-0.370603	-0.468014	NaN	NaN
ADPSBQ	ENSG00000145476.11	4_187122319_T_G_b37	4_187113041_C_G_b37	Independent	5.62168	NaN	NaN	-0.410683	-0.486665	-0.334701	0.370119	0.291885	0.448353	-0.040564	NaN	NaN
ADPSBQ	ENSG00000250829.2	4_187813409_T_C_b37	4_187761347_G_A_b37	Independent	5.58217	NaN	NaN	0.661639	0.478852	0.844426	-0.704198	-1.02284	-0.385561	-0.0425593	NaN	NaN
ADPSBQ	ENSG00000249378.1	4_190091024_TATA_T_b37	4_189377629_C_T_b37	Independent	5.03215	NaN	NaN	2.67918	2.45712	2.90125	-0.764272	-1.5462	0.0176555	1.91491	NaN	NaN
ADPSBQ	ENSG00000163138.14	4_20733270_G_A_b37	4_20685378_C_A_b37	Independent	5.68358	NaN	NaN	-0.322374	-0.4352	-0.209548	-0.137128	-0.186847	-0.0874097	-0.459502	NaN	NaN
ADPSBQ	ENSG00000168884.10	4_2432861_C_T_b37	4_2537473_C_T_b37	Independent	2.78613	NaN	NaN	-0.477745	-0.649276	-0.306213	0.14676	0.0901111	0.203409	-0.330984	NaN	NaN
ADPSBQ	ENSG00000063978.11	4_2486486_C_T_b37	4_2400738_C_T_b37	Independent	4.33232	NaN	NaN	0.156255	0.0966404	0.215869	0.0771787	-0.0609622	0.21532	0.233433	NaN	NaN
ADPSBQ	ENSG00000168824.10	4_3686901_A_G_b37	4_4394824_C_A_b37	Independent	5.5163	NaN	NaN	0.569461	0.393398	0.745524	-3.6692	-10.0787	2.74029	-3.09974	NaN	NaN
ADPSBQ	ENSG00000196355.2	4_38623422_C_G_b37	4_38689228_A_G_b37	Independent	0.923317	NaN	NaN	0.859312	0.68518	1.03344	-0.744154	-1.00569	-0.48262	0.115158	NaN	NaN
ADPSBQ	ENSG00000231160.5	4_38646954_G_A_b37	4_38662895_G_A_b37	Independent	4.10384	NaN	NaN	0.712101	0.589429	0.834772	-0.560186	-0.783109	-0.337262	0.151915	NaN	NaN
ADPSBQ	ENSG00000174125.3	4_39478832_G_A_b37	4_37973907_A_G_b37	Independent	3.58595	NaN	NaN	-0.330705	-0.481114	-0.180295	-0.199852	-0.292866	-0.106839	-0.530557	NaN	NaN
ADPSBQ	ENSG00000151806.9	4_44695521_GAAGA_G_b37	4_44703581_ACTAAGCCC_A_b37	Independent	5.65249	NaN	NaN	0.263227	0.208374	0.318079	-0.186747	-0.248368	-0.125127	0.0764795	NaN	NaN
ADPSBQ	ENSG00000163281.7	4_44706453_T_C_b37	4_44657987_C_A_b37	Independent	5.67332	NaN	NaN	0.419903	0.347487	0.492319	0.190873	0.124984	0.256762	0.610776	NaN	NaN
ADPSBQ	ENSG00000170448.7	4_47831107_G_A_b37	4_47916346_C_G_b37	Independent	5.6204	NaN	NaN	-0.240635	-0.322101	-0.159169	-0.659482	-1.0839	-0.235065	-0.900117	NaN	NaN
ADPSBQ	ENSG00000072840.8	4_5013745_G_T_b37	4_5808023_G_A_b37	Independent	2.51287	NaN	NaN	-0.147875	-0.212517	-0.0832325	0.13214	0.0651627	0.199118	-0.0157343	NaN	NaN
ADPSBQ	ENSG00000072832.10	4_5887388_A_C_b37	4_5832045_GT_G_b37	Independent	3.55972	NaN	NaN	-0.213948	-0.283404	-0.144491	-0.37797	-0.580232	-0.175709	-0.591918	NaN	NaN
ADPSBQ	ENSG00000150471.11	4_61567978_C_T_b37	4_62916873_CGT_C_b37	Independent	5.12464	NaN	NaN	0.310331	0.0746962	0.545965	-0.404231	-0.866959	0.0584973	-0.0939	NaN	NaN
ADPSBQ	ENSG00000251580.1	4_6670315_C_T_b37	4_6689989_C_T_b37	Independent	5.68017	NaN	NaN	-1.74069	-2.12147	-1.35991	1.12181	0.638914	1.6047	-0.618885	NaN	NaN
ADPSBQ	ENSG00000145241.6	4_68236670_C_A_b37	4_68411228_C_T_b37	Independent	5.69036	NaN	NaN	-0.300228	-0.393699	-0.206757	-0.15632	-0.241401	-0.0712382	-0.456548	NaN	NaN
ADPSBQ	ENSG00000163743.9	4_76450689_T_C_b37	4_76285765_G_A_b37	Independent	5.69373	NaN	NaN	0.164975	0.110143	0.219806	0.21582	0.113256	0.318385	0.380795	NaN	NaN
ADPSBQ	ENSG00000189157.9	4_77179518_G_T_b37	4_76990457_TA_T_b37	Independent	-1.23633	-26.6742	5.31629	-0.372422	-0.475882	-0.268962	0.79619	0.468891	1.12349	0.423768	NaN	NaN
ADPSBQ	ENSG00000250334.1	4_80492984_G_A_b37	4_80413707_G_A_b37	Independent	5.69373	NaN	NaN	-0.786003	-0.921205	-0.650802	-2.14807	-2.83975	-1.45639	-2.93407	NaN	NaN
ADPSBQ	ENSG00000251615.3	4_8368433_G_A_b37	4_8368932_C_T_b37	Independent	5.68358	NaN	NaN	-0.604801	-0.782952	-0.42665	0.700115	0.564361	0.835869	0.0953144	NaN	NaN
ADPSBQ	ENSG00000205959.3	4_8512712_A_G_b37	4_8429943_T_G_b37	Independent	5.66296	NaN	NaN	-0.429821	-0.552078	-0.307565	0.591445	0.421543	0.761346	0.161623	NaN	NaN
ADPSBQ	ENSG00000198189.6	4_88290265_G_A_b37	4_88258483_T_C_b37	Independent	5.66296	NaN	NaN	0.167933	0.109898	0.225967	0.512646	0.297312	0.72798	0.680579	NaN	NaN
ADPSBQ	ENSG00000152583.8	4_88456523_G_A_b37	4_88546078_C_T_b37	Independent	4.98493	NaN	NaN	0.28644	0.205158	0.367723	-0.166771	-0.234222	-0.0993192	0.11967	NaN	NaN
ADPSBQ	ENSG00000138641.11	4_89744825_A_G_b37	4_89536832_T_G_b37	Independent	5.68448	NaN	NaN	0.184214	0.120802	0.247626	-0.106222	-0.158832	-0.0536125	0.0779916	NaN	NaN
ADPSBQ	ENSG00000145214.9	4_960713_G_A_b37	4_908632_G_C_b37	Independent	5.46716	NaN	NaN	0.350141	0.292889	0.407393	-0.123872	-0.184205	-0.0635391	0.226269	NaN	NaN
ADPSBQ	ENSG00000248144.1	4_99563262_A_G_b37	4_100273368_G_GACTTA_b37	Independent	5.52545	NaN	NaN	-0.566332	-0.736433	-0.39623	-0.81699	-1.52478	-0.109199	-1.38332	NaN	NaN
ADPSBQ	ENSG00000172795.11	5_112346431_TG_T_b37	5_112322577_A_G_b37	Independent	5.39703	NaN	NaN	0.124801	0.0733074	0.176294	-0.103844	-0.172632	-0.035057	0.0209562	NaN	NaN
ADPSBQ	ENSG00000164219.5	5_114591726_C_G_b37	5_114598204_C_T_b37	Independent	5.52424	NaN	NaN	0.214698	0.162962	0.266433	-0.195306	-0.274057	-0.116555	0.0193916	NaN	NaN
ADPSBQ	ENSG00000129596.4	5_115010788_C_T_b37	5_115065950_C_T_b37	Independent	5.57218	NaN	NaN	-0.847319	-1.08073	-0.613907	0.450486	0.254591	0.646381	-0.396833	NaN	NaN
ADPSBQ	ENSG00000133835.10	5_117793701_A_G_b37	5_118950928_A_T_b37	Independent	5.27269	NaN	NaN	0.125708	0.0716772	0.179739	0.207538	0.097992	0.317083	0.333245	NaN	NaN
ADPSBQ	ENSG00000073578.12	5_118913_T_TTA_b37	5_217248_C_A_b37	Independent	5.64191	NaN	NaN	0.222176	0.160345	0.284007	0.147927	0.0369805	0.258873	0.370103	NaN	NaN
ADPSBQ	ENSG00000168938.5	5_122360403_T_C_b37	5_122578027_G_A_b37	Independent	-3.1783	-31.2263	4.94322	-1.06427	-1.52573	-0.602809	-0.201329	-0.286256	-0.116402	-1.2656	NaN	NaN
ADPSBQ	ENSG00000263432.1	5_122360403_T_C_b37	5_122138145_T_C_b37	Independent	3.62613	NaN	NaN	-0.902287	-1.11611	-0.688464	-0.410142	-0.598086	-0.222198	-1.31243	NaN	NaN
ADPSBQ	ENSG00000164904.11	5_125931022_T_G_b37	5_125874804_G_T_b37	Independent	4.30211	NaN	NaN	0.322646	0.247564	0.397728	0.114353	0.0605187	0.168186	0.436999	NaN	NaN
ADPSBQ	ENSG00000169567.7	5_130787206_C_T_b37	5_130282172_C_T_b37	Independent	5.64897	NaN	NaN	-0.0999452	-0.142958	-0.0569326	-0.220693	-0.36906	-0.0723266	-0.320639	NaN	NaN
ADPSBQ	ENSG00000170606.9	5_132426851_GTT_G_b37	5_132428503_T_C_b37	Independent	4.86342	NaN	NaN	-0.422178	-0.522281	-0.322075	0.141385	0.0832374	0.199532	-0.280793	NaN	NaN
ADPSBQ	ENSG00000205089.3	5_132643597_C_T_b37	5_132758353_T_C_b37	Independent	5.47615	NaN	NaN	-0.426052	-0.594402	-0.257702	-0.384476	-0.550307	-0.218646	-0.810528	NaN	NaN
ADPSBQ	ENSG00000270021.1	5_134760084_T_A_b37	5_134738600_A_G_b37	Independent	5.69036	NaN	NaN	-1.38549	-1.83211	-0.938858	2.29019	1.80577	2.77461	0.904703	NaN	NaN
ADPSBQ	ENSG00000253404.1	5_138088756_C_G_b37	5_138070621_C_T_b37	Independent	5.66988	NaN	NaN	1.92642	1.77808	2.07475	3.05642	2.68209	3.43075	4.98284	NaN	NaN
ADPSBQ	ENSG00000120324.4	5_140531746_C_G_b37	5_140601111_C_A_b37	Independent	5.53804	NaN	NaN	-0.2793	-0.391637	-0.166962	-0.300483	-0.437967	-0.162999	-0.579783	NaN	NaN
ADPSBQ	ENSG00000197479.4	5_140570973_C_T_b37	5_141430110_A_G_b37	Independent	5.49937	NaN	NaN	0.585709	0.418624	0.752794	0.691783	0.240293	1.14327	1.27749	NaN	NaN
ADPSBQ	ENSG00000120322.2	5_140581220_C_A_b37	5_140605078_C_T_b37	Independent	5.69373	NaN	NaN	0.876343	0.695399	1.05729	-0.646338	-0.910986	-0.38169	0.230005	NaN	NaN
ADPSBQ	ENSG00000113248.3	5_140583559_C_T_b37	5_140696065_A_T_b37	Independent	5.41741	NaN	NaN	0.957235	0.739358	1.17511	0.450469	0.303485	0.597453	1.4077	NaN	NaN
ADPSBQ	ENSG00000204956.4	5_140712586_C_T_b37	5_140680354_C_T_b37	Independent	5.69373	NaN	NaN	1.30152	0.869363	1.73368	-1.30533	-1.76137	-0.849285	-0.00380676	NaN	NaN
ADPSBQ	ENSG00000113552.11	5_141789015_G_A_b37	5_141400723_A_T_b37	Independent	2.04868	NaN	NaN	0.211358	0.131099	0.291616	0.400799	0.185981	0.615616	0.612156	NaN	NaN
ADPSBQ	ENSG00000145817.12	5_143580223_C_T_b37	5_143538589_G_C_b37	Independent	5.68358	NaN	NaN	-0.228444	-0.282841	-0.174047	0.129258	0.0603275	0.198189	-0.0991856	NaN	NaN
ADPSBQ	ENSG00000145569.5	5_14528587_G_A_b37	5_14528537_T_C_b37	Independent	5.37406	NaN	NaN	0.488359	0.350365	0.626352	-0.466472	-0.609809	-0.323135	0.0218868	NaN	NaN
ADPSBQ	ENSG00000070808.11	5_149784909_C_T_b37	5_149098106_C_T_b37	Independent	2.88045	NaN	NaN	-0.677943	-0.984885	-0.371001	-3.83102	-11.1876	3.52551	-4.50897	NaN	NaN
ADPSBQ	ENSG00000164587.7	5_149822016_G_GA_b37	5_149827132_C_T_b37	Independent	5.59842	NaN	NaN	-0.123234	-0.169802	-0.0766653	-0.271183	-0.435626	-0.10674	-0.394417	NaN	NaN
ADPSBQ	ENSG00000197083.7	5_150326495_T_A_b37	5_150324622_T_C_b37	Independent	5.69036	NaN	NaN	2.15925	2.00851	2.31	-0.899926	-1.03842	-0.761426	1.25933	NaN	NaN
ADPSBQ	ENSG00000196743.4	5_150606518_G_A_b37	5_150643053_C_T_b37	Independent	1.09609	NaN	NaN	0.457101	0.348099	0.566104	-0.128039	-0.201884	-0.0541948	0.329062	NaN	NaN
ADPSBQ	ENSG00000213433.5	5_150614551_A_AGCGG_b37	5_151144347_G_A_b37	Independent	5.3487	NaN	NaN	-0.866694	-1.03114	-0.702243	-1.92362	-3.33215	-0.515088	-2.79031	NaN	NaN
ADPSBQ	ENSG00000123643.8	5_150798334_G_A_b37	5_150853193_CTTTTGCTTTG_C_b37	Independent	3.47931	NaN	NaN	-0.606441	-0.687445	-0.525436	0.272414	0.191901	0.352927	-0.334027	NaN	NaN
ADPSBQ	ENSG00000260581.1	5_150847995_G_A_b37	5_151045061_A_G_b37	Independent	-0.623354	-14.3146	5.67594	2.21331	1.92698	2.49964	0.584944	0.354677	0.815212	2.79825	NaN	NaN
ADPSBQ	ENSG00000082516.8	5_154357652_A_G_b37	5_154122876_A_T_b37	Independent	5.57973	NaN	NaN	0.386595	0.253579	0.519611	0.240183	0.11388	0.366486	0.626778	NaN	NaN
ADPSBQ	ENSG00000185986.10	5_1566970_C_T_b37	5_1597726_C_T_b37	Independent	1.17515	NaN	NaN	-0.57737	-0.693855	-0.460885	0.163266	0.0817934	0.244739	-0.414104	NaN	NaN
ADPSBQ	ENSG00000251405.2	5_156811674_G_A_b37	5_157423813_G_A_b37	Independent	5.36132	NaN	NaN	2.29177	2.01886	2.56469	-0.806521	-1.1927	-0.420339	1.48525	NaN	NaN
ADPSBQ	ENSG00000188002.6	5_1594056_A_G_b37	5_1595616_G_C_b37	Independent	5.67332	NaN	NaN	-0.554204	-0.656892	-0.451517	-0.627413	-0.776786	-0.47804	-1.18162	NaN	NaN
ADPSBQ	ENSG00000145864.8	5_160566278_T_C_b37	5_160494759_A_C_b37	Independent	4.82047	NaN	NaN	-1.33541	-1.88466	-0.786166	-0.624811	-0.874271	-0.37535	-1.96022	NaN	NaN
ADPSBQ	ENSG00000188573.7	5_167942213_G_A_b37	5_167911291_GGT_G_b37	Independent	5.68358	NaN	NaN	2.35199	2.13505	2.56893	1.09885	0.82933	1.36837	3.45084	NaN	NaN
ADPSBQ	ENSG00000040275.12	5_169014301_C_T_b37	5_169016649_G_A_b37	Independent	5.69036	NaN	NaN	-0.29074	-0.370195	-0.211286	-0.664144	-0.86275	-0.465538	-0.954885	NaN	NaN
ADPSBQ	ENSG00000146094.9	5_176935999_G_A_b37	5_176937339_A_T_b37	Independent	5.65249	NaN	NaN	0.492981	0.357764	0.628198	-0.549102	-0.827141	-0.271062	-0.0561207	NaN	NaN
ADPSBQ	ENSG00000113240.8	5_178012176_A_G_b37	5_178010865_C_A_b37	Independent	5.69036	NaN	NaN	-0.285885	-0.356733	-0.215036	0.141161	0.0747499	0.207572	-0.144724	NaN	NaN
ADPSBQ	ENSG00000244945.1	5_178426520_C_G_b37	5_179072417_T_C_b37	Independent	3.47708	NaN	NaN	-0.502368	-0.688126	-0.31661	0.375664	0.138595	0.612732	-0.126705	NaN	NaN
ADPSBQ	ENSG00000245317.2	5_179269536_A_C_b37	5_179309065_T_C_b37	Independent	-1.04337	-25.4719	5.59878	-0.310689	-0.426111	-0.195267	0.798101	0.513026	1.08318	0.487412	NaN	NaN
ADPSBQ	ENSG00000161010.10	5_179270751_AC_A_b37	5_180202977_C_T_b37	Independent	5.56559	NaN	NaN	-0.502352	-0.656971	-0.347733	0.297648	0.143872	0.451424	-0.204704	NaN	NaN
ADPSBQ	ENSG00000197226.8	5_179307331_C_G_b37	5_179335060_A_G_b37	Independent	5.65948	NaN	NaN	0.574535	0.471182	0.677888	-0.12152	-0.167358	-0.0756818	0.453015	NaN	NaN
ADPSBQ	ENSG00000196670.9	5_180285913_G_A_b37	5_180284864_A_G_b37	Independent	5.67332	NaN	NaN	-0.182162	-0.229589	-0.134736	0.159887	-0.0153179	0.335093	-0.0222748	NaN	NaN
ADPSBQ	ENSG00000164366.3	5_210560_T_TA_b37	5_336775_T_TC_b37	Independent	2.32916	NaN	NaN	0.164719	0.0956253	0.233813	0.172245	0.0891189	0.255371	0.336964	NaN	NaN
ADPSBQ	ENSG00000183666.12	5_21295910_G_C_b37	5_21585236_A_C_b37	Independent	5.08229	NaN	NaN	1.3817	1.14723	1.61617	0.310151	0.185658	0.434645	1.69185	NaN	NaN
ADPSBQ	ENSG00000248874.1	5_24171298_T_C_b37	5_24168463_G_A_b37	Independent	5.67332	NaN	NaN	-1.06741	-1.33086	-0.803964	3.78135	2.06008	5.50263	2.71394	NaN	NaN
ADPSBQ	ENSG00000113361.8	5_31123473_T_C_b37	5_31651748_TA_T_b37	Independent	5.67675	NaN	NaN	1.22344	1.04599	1.40089	-0.90943	-1.46274	-0.356118	0.314009	NaN	NaN
ADPSBQ	ENSG00000113360.12	5_31529708_G_C_b37	5_31526371_T_C_b37	Independent	5.0864	NaN	NaN	0.369815	0.240438	0.499192	0.112309	0.0654778	0.15914	0.482124	NaN	NaN
ADPSBQ	ENSG00000250155.1	5_35865450_C_G_b37	5_36702864_C_A_b37	Independent	5.44161	NaN	NaN	0.682927	0.516502	0.849353	-0.519369	-1.42211	0.383368	0.163559	NaN	NaN
ADPSBQ	ENSG00000066230.6	5_466458_T_C_b37	5_426445_TGATG_T_b37	Independent	5.68698	NaN	NaN	0.980874	0.760172	1.20158	0.726875	0.519182	0.934569	1.70775	NaN	NaN
ADPSBQ	ENSG00000151883.12	5_50160386_C_A_b37	5_49920921_C_T_b37	Independent	5.32653	NaN	NaN	0.248931	0.155734	0.342129	-0.201379	-0.288672	-0.114085	0.0475528	NaN	NaN
ADPSBQ	ENSG00000250490.1	5_6368521_G_A_b37	5_6365689_T_C_b37	Independent	1.27266	NaN	NaN	0.672357	0.466471	0.878244	-0.605981	-0.811183	-0.40078	0.0663761	NaN	NaN
ADPSBQ	ENSG00000197860.5	5_64953081_C_T_b37	5_65532407_C_G_b37	Independent	4.96075	NaN	NaN	-0.202711	-0.27317	-0.132252	0.206516	0.0873651	0.325666	0.00380459	NaN	NaN
ADPSBQ	ENSG00000037474.10	5_6605540_T_C_b37	5_6605532_C_A_b37	Independent	5.68017	NaN	NaN	-0.338554	-0.377733	-0.299375	0.292827	0.182593	0.403061	-0.0457275	NaN	NaN
ADPSBQ	ENSG00000183323.8	5_68606611_G_A_b37	5_68480211_T_C_b37	Independent	5.62498	NaN	NaN	0.411817	0.308396	0.515239	-0.259839	-0.374794	-0.144884	0.151979	NaN	NaN
ADPSBQ	ENSG00000197822.6	5_68623784_C_T_b37	5_69291044_A_G_b37	Independent	2.76592	NaN	NaN	-0.670121	-1.18931	-0.150929	1.13603	0.141983	2.13008	0.465912	NaN	NaN
ADPSBQ	ENSG00000205571.8	5_68769560_A_G_b37	5_68851541_G_A_b37	Independent	5.60947	NaN	NaN	-1.21124	-1.75478	-0.667711	-6.64385	-95.0215	81.7338	-7.85509	NaN	NaN
ADPSBQ	ENSG00000205565.6	5_70636788_G_GA_b37	5_70307464_T_C_b37	Independent	5.55296	NaN	NaN	1.09285	0.481945	1.70375	-6.64386	-371.284	357.996	-5.55101	NaN	NaN
ADPSBQ	ENSG00000145736.10	5_71049021_AG_A_b37	5_70568209_G_A_b37	Independent	3.44674	NaN	NaN	-0.400718	-0.649649	-0.151787	-2.31955	-6.35986	1.72075	-2.72027	NaN	NaN
ADPSBQ	ENSG00000245556.2	5_77627771_T_C_b37	5_77920621_C_T_b37	Independent	2.92988	NaN	NaN	-0.181897	-0.384961	0.0211674	-0.266273	-0.395191	-0.137356	-0.44817	NaN	NaN
ADPSBQ	ENSG00000132840.5	5_78360558_TA_T_b37	5_78364844_C_A_b37	Independent	4.13888	NaN	NaN	0.531708	0.407003	0.656414	-0.229061	-0.330596	-0.127526	0.302647	NaN	NaN
ADPSBQ	ENSG00000145692.10	5_78404791_G_C_b37	5_78385845_T_G_b37	Independent	5.69036	NaN	NaN	1.10708	0.920007	1.29415	1.50783	1.00355	2.01212	2.61491	NaN	NaN
ADPSBQ	ENSG00000113318.9	5_79955924_G_T_b37	5_79928518_T_C_b37	Independent	5.68698	NaN	NaN	-0.230773	-0.303315	-0.158231	0.228853	0.16073	0.296976	-0.00192001	NaN	NaN
ADPSBQ	ENSG00000247572.3	5_80526919_G_C_b37	5_80603644_C_T_b37	Independent	5.61129	NaN	NaN	-1.45434	-1.64953	-1.25915	0.478257	0.404538	0.551975	-0.976085	NaN	NaN
ADPSBQ	ENSG00000152348.11	5_81378792_C_T_b37	5_81326622_G_A_b37	Independent	5.66643	NaN	NaN	0.556057	0.487334	0.624781	-0.605502	-0.732606	-0.478398	-0.0494445	NaN	NaN
ADPSBQ	ENSG00000268885.1	5_936597_A_T_b37	5_626156_TG_T_b37	Independent	3.23714	NaN	NaN	-0.700855	-0.975893	-0.425818	0.932748	0.426532	1.43897	0.231893	NaN	NaN
ADPSBQ	ENSG00000185261.9	5_94022905_C_CA_b37	5_93826731_T_C_b37	Independent	5.60212	NaN	NaN	0.416674	0.242719	0.590628	0.60015	0.264755	0.935546	1.01682	NaN	NaN
ADPSBQ	ENSG00000145757.11	5_94984839_TA_T_b37	5_95060244_C_T_b37	Independent	5.62572	NaN	NaN	-0.661061	-0.869572	-0.45255	0.434943	0.257964	0.611923	-0.226118	NaN	NaN
ADPSBQ	ENSG00000153113.19	5_95995733_G_T_b37	5_95999526_A_G_b37	Independent	5.69373	NaN	NaN	0.412522	0.368584	0.456461	-0.277528	-0.321525	-0.233531	0.134995	NaN	NaN
ADPSBQ	ENSG00000248734.2	5_96121524_C_T_b37	5_96114493_T_C_b37	Independent	0.975703	NaN	NaN	0.703743	0.555453	0.852034	-0.643088	-0.826106	-0.460069	0.0606559	NaN	NaN
ADPSBQ	ENSG00000111846.11	6_10723127_A_C_b37	6_10539289_T_G_b37	Independent	-0.491918	-19.3931	5.67332	-0.451783	-0.599648	-0.303918	1.19486	0.739588	1.65013	0.743074	NaN	NaN
ADPSBQ	ENSG00000111845.4	6_10844147_T_C_b37	6_10693504_T_C_b37	Independent	5.60971	NaN	NaN	-0.790075	-1.09658	-0.48357	-0.152093	-0.224278	-0.0799083	-0.942168	NaN	NaN
ADPSBQ	ENSG00000004809.9	6_110797945_T_TC_b37	6_110806805_G_GGAAGGGGCACATCA_b37	Independent	4.7946	NaN	NaN	-1.8592	-2.10252	-1.61588	-0.558989	-0.791805	-0.326173	-2.41819	NaN	NaN
ADPSBQ	ENSG00000197498.8	6_111294340_C_T_b37	6_111367124_T_G_b37	Independent	3.88685	NaN	NaN	0.163021	0.108914	0.217129	-0.147676	-0.205459	-0.0898926	0.0153455	NaN	NaN
ADPSBQ	ENSG00000188820.8	6_116831611_A_AT_b37	6_117029103_C_G_b37	Independent	4.63114	NaN	NaN	-0.92988	-1.46084	-0.398922	0.507942	0.319204	0.69668	-0.421938	NaN	NaN
ADPSBQ	ENSG00000111832.8	6_116961282_G_A_b37	6_116881347_A_G_b37	Independent	5.66296	NaN	NaN	-0.202689	-0.295853	-0.109524	0.21405	0.110051	0.318049	0.0113615	NaN	NaN
ADPSBQ	ENSG00000146350.9	6_121406515_A_ATG_b37	6_121373646_T_C_b37	Independent	2.35904	NaN	NaN	0.711484	0.484422	0.938545	-0.346046	-0.507017	-0.185076	0.365437	NaN	NaN
ADPSBQ	ENSG00000111906.13	6_124806816_C_T_b37	6_125620444_A_G_b37	Independent	5.58149	NaN	NaN	-0.291457	-0.349698	-0.233216	-0.429786	-0.600551	-0.259022	-0.721243	NaN	NaN
ADPSBQ	ENSG00000135541.16	6_135623833_C_T_b37	6_135848175_T_TAAA_b37	Independent	2.60758	NaN	NaN	-0.578609	-0.666273	-0.490945	0.295726	0.223889	0.367563	-0.282883	NaN	NaN
ADPSBQ	ENSG00000135525.14	6_136904672_C_T_b37	6_136852285_G_A_b37	Independent	5.64897	NaN	NaN	0.917353	0.490128	1.34458	-0.47072	-0.690247	-0.251194	0.446633	NaN	NaN
ADPSBQ	ENSG00000050393.7	6_13784625_C_T_b37	6_13456654_G_A_b37	Independent	4.99208	NaN	NaN	-0.230043	-0.289949	-0.170137	0.196279	0.042814	0.349744	-0.0337636	NaN	NaN
ADPSBQ	ENSG00000146386.7	6_139370426_T_C_b37	6_139332842_T_A_b37	Independent	5.57366	NaN	NaN	-0.235469	-0.321591	-0.149348	-0.248919	-0.346074	-0.151764	-0.484389	NaN	NaN
ADPSBQ	ENSG00000111961.12	6_148854362_G_A_b37	6_148825030_C_T_b37	Independent	5.63119	NaN	NaN	-0.177553	-0.23983	-0.115277	-0.202123	-0.290104	-0.114142	-0.379676	NaN	NaN
ADPSBQ	ENSG00000231760.2	6_150085665_A_C_b37	6_149586560_C_A_b37	Independent	5.26905	NaN	NaN	1.94367	1.77656	2.11077	-0.490702	-0.72795	-0.253453	1.45296	NaN	NaN
ADPSBQ	ENSG00000120253.9	6_150262994_T_C_b37	6_150070529_C_G_b37	Independent	3.50624	NaN	NaN	-0.25441	-0.314948	-0.193872	0.239324	0.116894	0.361753	-0.0150859	NaN	NaN
ADPSBQ	ENSG00000131015.4	6_150302526_AT_A_b37	6_150935556_T_C_b37	Independent	-0.657849	-6.64006	5.64119	-0.944199	-1.29677	-0.591629	-0.423988	-0.634765	-0.213212	-1.36819	NaN	NaN
ADPSBQ	ENSG00000203722.3	6_150772740_G_A_b37	6_151188245_A_G_b37	Independent	5.1635	NaN	NaN	-1.0394	-1.63983	-0.438975	-0.508519	-1.00827	-0.00876385	-1.54792	NaN	NaN
ADPSBQ	ENSG00000146469.8	6_153058970_A_G_b37	6_153190243_A_G_b37	Independent	5.64191	NaN	NaN	-0.881536	-1.30489	-0.458179	-0.849626	-1.3493	-0.34995	-1.73116	NaN	NaN
ADPSBQ	ENSG00000112031.11	6_153320960_T_C_b37	6_153349379_G_A_b37	Independent	3.06781	NaN	NaN	-0.242096	-0.295412	-0.188779	-0.112298	-0.164102	-0.0604952	-0.354394	NaN	NaN
ADPSBQ	ENSG00000272047.1	6_158587873_T_C_b37	6_158519008_T_C_b37	Independent	5.69036	NaN	NaN	0.28101	0.113084	0.448936	-0.138833	-0.195984	-0.0816823	0.142177	NaN	NaN
ADPSBQ	ENSG00000122335.9	6_158599688_G_A_b37	6_158572975_G_T_b37	Independent	-4.19788	-46.6725	5.68017	0.242593	0.172053	0.313134	0.20001	0.100522	0.299499	0.442604	NaN	NaN
ADPSBQ	ENSG00000112110.5	6_160179768_G_A_b37	6_160188891_T_C_b37	Independent	5.59561	NaN	NaN	-0.367203	-0.414847	-0.31956	0.131745	0.0785045	0.184985	-0.235459	NaN	NaN
ADPSBQ	ENSG00000213073.4	6_161174382_TA_T_b37	6_160468669_G_A_b37	Independent	1.10549	NaN	NaN	0.346314	0.129488	0.563141	-0.242209	-0.405421	-0.078998	0.104105	NaN	NaN
ADPSBQ	ENSG00000197146.2	6_167362976_A_G_b37	6_167360024_C_T_b37	Independent	5.60211	NaN	NaN	-1.84	-2.48157	-1.19842	0.467566	0.317887	0.617245	-1.37243	NaN	NaN
ADPSBQ	ENSG00000026297.11	6_167363948_G_A_b37	6_167358233_C_T_b37	Independent	5.1456	NaN	NaN	0.194014	0.11751	0.270517	0.195097	0.0990635	0.29113	0.38911	NaN	NaN
ADPSBQ	ENSG00000130396.16	6_167567142_A_G_b37	6_168361758_A_AAT_b37	Independent	5.64897	NaN	NaN	-0.507706	-0.750446	-0.264965	0.444488	0.27056	0.618415	-0.0632181	NaN	NaN
ADPSBQ	ENSG00000229921.2	6_168396573_T_C_b37	6_168404976_T_C_b37	Independent	3.40962	NaN	NaN	-1.66579	-2.07567	-1.25591	1.09409	0.534564	1.65362	-0.571697	NaN	NaN
ADPSBQ	ENSG00000228412.2	6_19804014_C_T_b37	6_19803831_C_G_b37	Independent	5.69036	NaN	NaN	-2.30106	-2.74355	-1.85857	0.544	0.336635	0.751365	-1.75706	NaN	NaN
ADPSBQ	ENSG00000272168.1	6_22043809_A_G_b37	6_21801717_TA_T_b37	Independent	1.73329	NaN	NaN	0.708791	0.538779	0.878803	-0.373301	-0.544192	-0.202409	0.33549	NaN	NaN
ADPSBQ	ENSG00000186470.9	6_26360443_TTTTTC_T_b37	6_26352566_T_C_b37	Independent	5.69036	NaN	NaN	-3.32857	-3.60853	-3.04861	0.264981	0.18198	0.347982	-3.06359	NaN	NaN
ADPSBQ	ENSG00000197903.6	6_26378857_G_A_b37	6_26199903_C_T_b37	Independent	5.68017	NaN	NaN	-0.364156	-0.528532	-0.19978	0.440021	0.235463	0.644579	0.0758651	NaN	NaN
ADPSBQ	ENSG00000124549.10	6_26380032_A_G_b37	6_26444168_C_T_b37	Independent	5.41465	NaN	NaN	-0.209574	-0.306375	-0.112772	-0.451765	-0.55848	-0.345051	-0.661339	NaN	NaN
ADPSBQ	ENSG00000112763.11	6_26381917_T_C_b37	6_26458525_C_G_b37	Independent	5.05242	NaN	NaN	-0.160705	-0.218917	-0.102494	-0.320458	-0.43678	-0.204135	-0.481163	NaN	NaN
ADPSBQ	ENSG00000261584.1	6_26936723_C_T_b37	6_26871384_C_A_b37	Independent	4.16946	NaN	NaN	-2.18386	-2.58017	-1.78754	0.261405	0.107199	0.415611	-1.92245	NaN	NaN
ADPSBQ	ENSG00000146109.3	6_27176458_C_A_b37	6_26896681_C_T_b37	Independent	5.60947	NaN	NaN	-0.323547	-0.529723	-0.117372	-0.196707	-0.300857	-0.092558	-0.520255	NaN	NaN
ADPSBQ	ENSG00000204789.3	6_27308665_G_A_b37	6_27497139_C_CT_b37	Independent	5.28825	NaN	NaN	0.431894	0.154651	0.709137	-0.255961	-0.410547	-0.101375	0.175933	NaN	NaN
ADPSBQ	ENSG00000226314.3	6_28181675_G_A_b37	6_27300580_A_G_b37	Independent	5.63816	NaN	NaN	0.591514	0.449515	0.733512	0.448461	0.284671	0.612251	1.03997	NaN	NaN
ADPSBQ	ENSG00000229390.1	6_29585081_T_TC_b37	6_29884521_T_C_b37	Independent	5.44674	NaN	NaN	1.82738	1.36288	2.29188	0.29092	0.102931	0.478909	2.1183	NaN	NaN
ADPSBQ	ENSG00000204644.5	6_29647545_T_C_b37	6_29903755_TACAC_T_b37	Independent	2.58784	NaN	NaN	4.31136	4.12374	4.49898	1.24895	0.870368	1.62754	5.56031	NaN	NaN
ADPSBQ	ENSG00000235821.1	6_29712721_CA_C_b37	6_29721847_TA_T_b37	Independent	5.44403	NaN	NaN	1.11908	0.912756	1.3254	-0.504462	-0.709228	-0.299697	0.614614	NaN	NaN
ADPSBQ	ENSG00000066379.10	6_29753242_T_C_b37	6_29956755_A_AT_b37	Independent	5.63264	NaN	NaN	0.331197	0.223427	0.438966	-0.148607	-0.214547	-0.0826666	0.18259	NaN	NaN
ADPSBQ	ENSG00000239257.1	6_29760856_C_T_b37	6_29714965_C_T_b37	Independent	4.74138	NaN	NaN	1.4107	1.26341	1.55799	-0.724974	-1.07761	-0.372337	0.685724	NaN	NaN
ADPSBQ	ENSG00000204681.6	6_29802532_C_G_b37	6_30368092_C_T_b37	Independent	4.7602	NaN	NaN	0.248117	0.154547	0.341688	0.145368	0.0677795	0.222957	0.393485	NaN	NaN
ADPSBQ	ENSG00000235290.1	6_29825883_G_A_b37	6_29927629_G_A_b37	Independent	4.8347	NaN	NaN	2.51868	2.35183	2.68553	-0.622199	-0.885639	-0.358759	1.89648	NaN	NaN
ADPSBQ	ENSG00000176998.3	6_29894393_C_G_b37	6_29761062_A_G_b37	Independent	5.63121	NaN	NaN	-1.65755	-1.87865	-1.43645	-2.83496	-6.17099	0.501078	-4.49251	NaN	NaN
ADPSBQ	ENSG00000204622.6	6_29909916_A_T_b37	6_29840243_A_G_b37	Independent	5.60366	NaN	NaN	1.76317	1.59914	1.9272	0.36485	0.237361	0.492339	2.12802	NaN	NaN
ADPSBQ	ENSG00000227214.2	6_29921858_C_G_b37	6_29052214_G_A_b37	Independent	4.575	NaN	NaN	-1.08494	-2.81063	0.640757	0.432883	0.232997	0.632768	-0.652053	NaN	NaN
ADPSBQ	ENSG00000227262.3	6_29923161_A_G_b37	6_29819694_C_T_b37	Independent	5.69373	NaN	NaN	-1.39226	-1.7877	-0.996821	0.392182	0.225961	0.558403	-1.00008	NaN	NaN
ADPSBQ	ENSG00000224846.1	6_2999243_C_T_b37	6_2827150_C_T_b37	Independent	5.34507	NaN	NaN	0.767213	0.63389	0.900537	-0.182624	-0.318866	-0.0463822	0.584589	NaN	NaN
ADPSBQ	ENSG00000204623.4	6_30032673_A_G_b37	6_30041559_G_A_b37	Independent	5.69373	NaN	NaN	-0.468099	-0.611688	-0.32451	-0.224738	-0.29295	-0.156526	-0.692837	NaN	NaN
ADPSBQ	ENSG00000124588.15	6_3003970_A_G_b37	6_3009944_A_G_b37	Independent	5.51343	NaN	NaN	-0.805365	-0.921082	-0.689649	-0.435043	-0.527975	-0.342111	-1.24041	NaN	NaN
ADPSBQ	ENSG00000243753.1	6_30061910_G_A_b37	6_30319374_A_G_b37	Independent	4.81868	NaN	NaN	0.321734	0.186427	0.45704	-0.342172	-0.523879	-0.160464	-0.020438	NaN	NaN
ADPSBQ	ENSG00000261015.1	6_3007428_A_C_b37	6_3018811_T_A_b37	Independent	5.64545	NaN	NaN	-1.17051	-1.33499	-1.00604	-0.313026	-0.440793	-0.185259	-1.48354	NaN	NaN
ADPSBQ	ENSG00000270346.1	6_3016732_G_A_b37	6_3023384_T_A_b37	Independent	-6.34532	-23.9702	4.83622	1.77309	1.63388	1.9123	-0.441411	-0.557013	-0.325808	1.33168	NaN	NaN
ADPSBQ	ENSG00000270604.1	6_30176311_C_G_b37	6_29753370_C_T_b37	Independent	5.43302	NaN	NaN	-0.555021	-0.761272	-0.348769	-0.427243	-0.629913	-0.224574	-0.982264	NaN	NaN
ADPSBQ	ENSG00000241370.1	6_30229280_C_A_b37	6_29910549_G_A_b37	Independent	5.53339	NaN	NaN	-0.197895	-0.277718	-0.118071	0.532145	-0.0503498	1.11464	0.33425	NaN	NaN
ADPSBQ	ENSG00000231074.4	6_30292608_CG_C_b37	6_30215592_G_A_b37	Independent	5.38513	NaN	NaN	0.252853	0.187436	0.31827	0.125395	0.0675095	0.183281	0.378248	NaN	NaN
ADPSBQ	ENSG00000137411.12	6_30900427_T_G_b37	6_30895264_C_T_b37	Independent	5.65922	NaN	NaN	0.277613	0.212946	0.34228	0.327252	0.255221	0.399282	0.604865	NaN	NaN
ADPSBQ	ENSG00000228789.2	6_31027668_TG_T_b37	6_31020360_T_C_b37	Independent	4.73931	NaN	NaN	-1.47424	-1.73757	-1.21091	-0.719666	-1.03408	-0.405248	-2.19391	NaN	NaN
ADPSBQ	ENSG00000204538.3	6_31095285_G_C_b37	6_31082960_A_G_b37	Independent	5.63577	NaN	NaN	0.896987	0.505955	1.28802	1.25389	0.82142	1.68637	2.15088	NaN	NaN
ADPSBQ	ENSG00000204540.6	6_31095294_A_G_b37	6_31082960_A_G_b37	Independent	5.13948	NaN	NaN	1.9472	1.78274	2.11166	-0.558247	-0.710007	-0.406487	1.38895	NaN	NaN
ADPSBQ	ENSG00000272501.1	6_31144678_G_T_b37	6_31188267_C_T_b37	Independent	5.5995	NaN	NaN	-0.987312	-1.11027	-0.864353	0.644594	0.515764	0.773423	-0.342718	NaN	NaN
ADPSBQ	ENSG00000206344.6	6_31166297_A_G_b37	6_31141209_A_G_b37	Independent	-6.43449	-24.3046	4.56918	0.928948	0.777782	1.08011	0.717556	0.524449	0.910663	1.6465	NaN	NaN
ADPSBQ	ENSG00000204528.3	6_31234222_G_A_b37	6_31200814_G_A_b37	Independent	5.68698	NaN	NaN	2.34684	2.11015	2.58352	0.915598	0.679619	1.15158	3.26244	NaN	NaN
ADPSBQ	ENSG00000234745.5	6_31325004_G_A_b37	6_31321407_C_T_b37	Independent	4.64138	NaN	NaN	-0.444199	-0.515867	-0.372532	0.373676	0.268854	0.478497	-0.0705235	NaN	NaN
ADPSBQ	ENSG00000199332.1	6_31326322_TAC_T_b37	6_31382342_A_G_b37	Independent	5.38683	NaN	NaN	-0.513399	-0.73189	-0.294908	-0.40653	-0.633114	-0.179947	-0.919929	NaN	NaN
ADPSBQ	ENSG00000240053.8	6_31676641_C_T_b37	6_31648403_C_T_b37	Independent	5.66296	NaN	NaN	-0.387346	-0.451155	-0.323537	-0.223213	-0.283079	-0.163347	-0.610559	NaN	NaN
ADPSBQ	ENSG00000204305.9	6_31761083_A_T_b37	6_32143223_T_C_b37	Independent	5.58906	NaN	NaN	0.395918	0.259673	0.532164	0.98	0.740227	1.21977	1.37592	NaN	NaN
ADPSBQ	ENSG00000231852.2	6_31884823_T_C_b37	6_32676682_T_TTTG_b37	Independent	4.38767	NaN	NaN	0.971089	0.643902	1.29828	0.960664	0.431582	1.48975	1.93175	NaN	NaN
ADPSBQ	ENSG00000204351.7	6_31932177_C_T_b37	6_31916400_A_G_b37	Independent	5.69373	NaN	NaN	0.348673	0.296117	0.401228	0.10609	0.06186	0.150321	0.454763	NaN	NaN
ADPSBQ	ENSG00000250535.1	6_31933518_T_C_b37	6_31809088_TACAA_T_b37	Independent	5.69373	NaN	NaN	3.77557	3.52407	4.02706	0.902537	0.692717	1.11236	4.6781	NaN	NaN
ADPSBQ	ENSG00000204338.4	6_32032743_G_A_b37	6_32611196_ATGT_A_b37	Independent	5.21389	NaN	NaN	0.92636	0.715642	1.13708	-2.09721	-2.78603	-1.4084	-1.17085	NaN	NaN
ADPSBQ	ENSG00000213676.6	6_32083175_C_T_b37	6_32489507_G_T_b37	Independent	1.68726	NaN	NaN	0.168917	0.121139	0.216694	0.184864	0.0539487	0.315779	0.353781	NaN	NaN
ADPSBQ	ENSG00000204301.5	6_32184705_G_A_b37	6_32191041_G_A_b37	Independent	5.18284	NaN	NaN	-0.53647	-0.63634	-0.436599	-0.263377	-0.349743	-0.177012	-0.799847	NaN	NaN
ADPSBQ	ENSG00000244731.3	6_32194630_G_C_b37	6_32131510_T_C_b37	Independent	5.67675	NaN	NaN	-4.24785	-4.93203	-3.56368	-0.60409	-0.843099	-0.365081	-4.85194	NaN	NaN
ADPSBQ	ENSG00000224389.4	6_32289358_G_A_b37	6_32007849_G_C_b37	Independent	5.41488	NaN	NaN	-1.06219	-1.52449	-0.5999	0.652469	0.392754	0.912184	-0.409725	NaN	NaN
ADPSBQ	ENSG00000241287.1	6_32494149_T_C_b37	6_32633878_C_T_b37	Independent	4.23575	NaN	NaN	-1.79941	-2.00401	-1.59482	0.186056	-0.0358513	0.407963	-1.61336	NaN	NaN
ADPSBQ	ENSG00000196126.6	6_32573909_C_A_b37	6_32576282_T_TA_b37	Independent	5.34181	NaN	NaN	-1.65023	-1.87189	-1.42856	-1.18084	-1.40553	-0.956149	-2.83107	NaN	NaN
ADPSBQ	ENSG00000228962.1	6_32622478_C_T_b37	6_32495340_G_A_b37	Independent	4.39755	NaN	NaN	-0.978937	-1.86603	-0.0918414	0.390747	0.107337	0.674158	-0.58819	NaN	NaN
ADPSBQ	ENSG00000241106.2	6_32796480_T_C_b37	6_32796793_G_A_b37	Independent	5.69373	NaN	NaN	1.92271	1.69892	2.14649	-0.832248	-1.03219	-0.632304	1.09046	NaN	NaN
ADPSBQ	ENSG00000124562.5	6_34746151_G_A_b37	6_35387465_G_A_b37	Independent	5.60054	NaN	NaN	-0.143469	-0.180586	-0.106352	0.262263	0.142927	0.381598	0.118794	NaN	NaN
ADPSBQ	ENSG00000198755.6	6_35444349_TACA_T_b37	6_35432100_C_T_b37	Independent	5.61313	NaN	NaN	-0.0700452	-0.105554	-0.0345363	-0.242778	-0.408337	-0.07722	-0.312824	NaN	NaN
ADPSBQ	ENSG00000065060.12	6_35741940_TG_T_b37	6_34786408_A_G_b37	Independent	5.32774	NaN	NaN	0.484559	0.43185	0.537268	0.123167	0.0678374	0.178497	0.607726	NaN	NaN
ADPSBQ	ENSG00000112053.9	6_35939558_T_C_b37	6_36057914_A_AT_b37	Independent	5.05412	NaN	NaN	1.47533	1.25044	1.70021	-0.665248	-1.00098	-0.329515	0.810078	NaN	NaN
ADPSBQ	ENSG00000112130.12	6_37348316_A_G_b37	6_37069885_A_G_b37	Independent	3.65083	NaN	NaN	-0.14622	-0.18934	-0.1031	-0.0886803	-0.133385	-0.0439761	-0.2349	NaN	NaN
ADPSBQ	ENSG00000112167.5	6_39053096_A_G_b37	6_39894051_T_C_b37	Independent	4.66563	NaN	NaN	-0.112054	-0.170643	-0.0534656	0.198212	0.109292	0.287131	0.0861572	NaN	NaN
ADPSBQ	ENSG00000161912.13	6_41027520_C_T_b37	6_41069193_C_G_b37	Independent	5.68017	NaN	NaN	0.861822	0.717183	1.00646	0.31086	0.20624	0.41548	1.17268	NaN	NaN
ADPSBQ	ENSG00000185689.11	6_4102846_CTTTG_C_b37	6_4125655_A_G_b37	Independent	5.42418	NaN	NaN	-0.488608	-0.615747	-0.361469	0.371498	0.233858	0.509139	-0.11711	NaN	NaN
ADPSBQ	ENSG00000048544.5	6_42160041_A_G_b37	6_42171815_G_A_b37	Independent	5.68698	NaN	NaN	0.288752	0.247758	0.329745	0.151318	0.0936101	0.209026	0.44007	NaN	NaN
ADPSBQ	ENSG00000124641.10	6_42677875_T_G_b37	6_41888827_C_G_b37	Independent	5.62164	NaN	NaN	-0.196562	-0.250895	-0.142228	0.110593	0.0519465	0.169239	-0.0859691	NaN	NaN
ADPSBQ	ENSG00000124587.9	6_42942779_A_G_b37	6_42940673_A_G_b37	Independent	1.93059	NaN	NaN	0.548575	0.449569	0.647581	0.557953	0.448712	0.667195	1.10653	NaN	NaN
ADPSBQ	ENSG00000044090.4	6_43006982_T_C_b37	6_43299719_A_C_b37	Independent	5.42976	NaN	NaN	-0.313666	-0.431178	-0.196154	0.115363	0.0561742	0.174551	-0.198303	NaN	NaN
ADPSBQ	ENSG00000180992.5	6_44057670_G_C_b37	6_44081718_G_A_b37	Independent	5.23564	NaN	NaN	-0.173475	-0.230999	-0.115951	-0.212149	-0.297306	-0.126993	-0.385624	NaN	NaN
ADPSBQ	ENSG00000137225.8	6_44177925_G_T_b37	6_44170262_G_A_b37	Independent	2.66366	NaN	NaN	0.374468	0.212973	0.535964	0.410408	0.227808	0.593007	0.784876	NaN	NaN
ADPSBQ	ENSG00000180113.11	6_46644875_C_T_b37	6_46670822_C_T_b37	Independent	5.69373	NaN	NaN	-0.921896	-1.07347	-0.770322	0.530836	0.365666	0.696006	-0.39106	NaN	NaN
ADPSBQ	ENSG00000153291.11	6_46670822_C_T_b37	6_46624656_A_T_b37	Independent	5.69373	NaN	NaN	0.450514	0.379102	0.521927	-0.229819	-0.315676	-0.143963	0.220695	NaN	NaN
ADPSBQ	ENSG00000031691.6	6_49443027_A_G_b37	6_49459978_A_G_b37	Independent	5.5088	NaN	NaN	0.605468	0.523634	0.687301	-0.254934	-0.354454	-0.155413	0.350534	NaN	NaN
ADPSBQ	ENSG00000214113.6	6_5136216_G_C_b37	6_5260694_C_T_b37	Independent	5.31229	NaN	NaN	-0.158807	-0.215406	-0.102208	0.193311	0.0991908	0.287432	0.0345041	NaN	NaN
ADPSBQ	ENSG00000269985.1	6_5404587_C_T_b37	6_5453079_A_T_b37	Independent	5.48205	NaN	NaN	-0.8081	-1.00631	-0.609892	-1.24916	-1.94737	-0.550944	-2.05726	NaN	NaN
ADPSBQ	ENSG00000239650.3	6_58217713_A_G_b37	6_58279488_C_T_b37	Independent	5.50126	NaN	NaN	0.333834	0.18763	0.480038	0.22562	0.0842744	0.366966	0.559454	NaN	NaN
ADPSBQ	ENSG00000215190.4	6_58303520_T_A_b37	6_58339845_C_T_b37	Independent	5.68358	NaN	NaN	-0.941605	-1.01408	-0.869133	0.461927	0.34727	0.576584	-0.479678	NaN	NaN
ADPSBQ	ENSG00000119899.11	6_74305851_G_C_b37	6_74307215_A_C_b37	Independent	5.68698	NaN	NaN	0.351882	0.254608	0.449156	-0.246459	-0.353479	-0.13944	0.105423	NaN	NaN
ADPSBQ	ENSG00000272243.1	6_75236060_G_A_b37	6_75060004_A_G_b37	Independent	5.15793	NaN	NaN	0.494994	0.273491	0.716497	-0.404909	-0.589556	-0.220261	0.0900853	NaN	NaN
ADPSBQ	ENSG00000239264.4	6_7881931_T_C_b37	6_7910352_A_C_b37	Independent	3.35471	NaN	NaN	-0.38063	-0.462511	-0.298749	-0.149807	-0.20443	-0.0951838	-0.530437	NaN	NaN
ADPSBQ	ENSG00000112742.5	6_80624530_A_T_b37	6_81271777_G_T_b37	Independent	3.53451	NaN	NaN	-1.27984	-1.83756	-0.722118	0.527643	0.27481	0.780476	-0.752194	NaN	NaN
ADPSBQ	ENSG00000203871.4	6_88062190_C_G_b37	6_87198332_A_C_b37	Independent	5.27733	NaN	NaN	-0.638117	-0.774422	-0.501811	-0.413443	-0.608336	-0.218549	-1.05156	NaN	NaN
ADPSBQ	ENSG00000203872.6	6_88073706_C_CA_b37	6_88032788_G_T_b37	Independent	0.997727	NaN	NaN	-0.881197	-1.23141	-0.530984	-0.350398	-0.491023	-0.209774	-1.2316	NaN	NaN
ADPSBQ	ENSG00000083099.6	6_89898502_T_C_b37	6_90392595_G_T_b37	Independent	4.93047	NaN	NaN	-0.14404	-0.186822	-0.101258	0.0853786	0.0399184	0.130839	-0.0586617	NaN	NaN
ADPSBQ	ENSG00000166924.4	7_100091795_T_C_b37	7_99521256_A_T_b37	Independent	5.65948	NaN	NaN	-0.71507	-0.87082	-0.55932	1.73544	1.15637	2.31451	1.02037	NaN	NaN
ADPSBQ	ENSG00000146830.9	7_100266166_G_A_b37	7_100292914_T_C_b37	Independent	5.66988	NaN	NaN	-0.218998	-0.271929	-0.166068	-0.0913413	-0.136037	-0.0466453	-0.31034	NaN	NaN
ADPSBQ	ENSG00000267368.1	7_102102343_T_C_b37	7_102368966_A_G_b37	Independent	0.776274	NaN	NaN	-0.829092	-1.01317	-0.645018	1.15291	0.741496	1.56433	0.323822	NaN	NaN
ADPSBQ	ENSG00000170632.9	7_102729631_T_G_b37	7_102717712_C_T_b37	Independent	5.69373	NaN	NaN	0.107198	0.0642314	0.150165	-0.270359	-0.337244	-0.203474	-0.163161	NaN	NaN
ADPSBQ	ENSG00000241764.3	7_107431776_G_C_b37	7_107384278_C_T_b37	Independent	-3.42952	-17.7502	5.38103	0.831364	0.678338	0.98439	0.57171	0.356299	0.787121	1.40307	NaN	NaN
ADPSBQ	ENSG00000178381.7	7_1214003_T_C_b37	7_704174_A_G_b37	Independent	1.45817	NaN	NaN	-0.466289	-0.527763	-0.404816	-0.395961	-0.603932	-0.18799	-0.86225	NaN	NaN
ADPSBQ	ENSG00000002745.8	7_121746513_C_CA_b37	7_120940436_C_T_b37	Independent	5.2523	NaN	NaN	0.991239	0.657506	1.32497	-2.36249	-4.11576	-0.609223	-1.37125	NaN	NaN
ADPSBQ	ENSG00000271553.1	7_128171353_CT_C_b37	7_128286797_C_A_b37	Independent	5.59099	NaN	NaN	1.26504	1.08861	1.44147	0.450837	0.289009	0.612665	1.71588	NaN	NaN
ADPSBQ	ENSG00000243679.1	7_128233768_GT_G_b37	7_128281256_G_A_b37	Independent	5.36481	NaN	NaN	0.570696	0.497649	0.643742	0.28559	0.194619	0.37656	0.856285	NaN	NaN
ADPSBQ	ENSG00000271529.1	7_128293187_C_T_b37	7_128332247_G_A_b37	Independent	5.66296	NaN	NaN	0.701613	0.59197	0.811256	1.39088	1.26595	1.51581	2.0925	NaN	NaN
ADPSBQ	ENSG00000242588.2	7_128294338_C_T_b37	7_128281256_G_A_b37	Independent	5.65948	NaN	NaN	0.943502	0.86044	1.02657	-0.337279	-0.455292	-0.219266	0.606224	NaN	NaN
ADPSBQ	ENSG00000128578.5	7_128371206_G_A_b37	7_129137840_T_C_b37	Independent	5.1233	NaN	NaN	0.538286	0.18726	0.889313	-0.417228	-0.596125	-0.238332	0.121058	NaN	NaN
ADPSBQ	ENSG00000230715.2	7_128501276_C_T_b37	7_128281256_G_A_b37	Independent	5.64191	NaN	NaN	0.803628	0.742016	0.865239	0.586054	0.283001	0.889107	1.38968	NaN	NaN
ADPSBQ	ENSG00000135253.9	7_128558171_A_G_b37	7_128550786_G_A_b37	Independent	5.64297	NaN	NaN	-0.74403	-0.961828	-0.526231	1.61023	1.03188	2.18858	0.866204	NaN	NaN
ADPSBQ	ENSG00000174595.4	7_129463837_C_A_b37	7_130449458_G_A_b37	Independent	5.57973	NaN	NaN	-2.23019	-6.93387	2.47349	-0.518779	-0.723479	-0.314079	-2.74897	NaN	NaN
ADPSBQ	ENSG00000106484.10	7_130020065_C_T_b37	7_130957256_A_G_b37	Independent	4.10229	NaN	NaN	-0.635308	-0.88028	-0.390336	0.503188	0.278655	0.72772	-0.13212	NaN	NaN
ADPSBQ	ENSG00000172331.7	7_134363870_G_A_b37	7_134370356_T_A_b37	Independent	5.66296	NaN	NaN	-0.350722	-0.511555	-0.189889	0.259764	0.0776493	0.441878	-0.0909582	NaN	NaN
ADPSBQ	ENSG00000146856.10	7_134833214_C_A_b37	7_134250320_C_T_b37	Independent	5.24764	NaN	NaN	0.301111	0.173057	0.429165	-0.501968	-0.742272	-0.261664	-0.200858	NaN	NaN
ADPSBQ	ENSG00000243317.3	7_135242910_C_T_b37	7_135356547_A_C_b37	Independent	-4.78686	-23.1723	4.37026	0.135129	0.0857171	0.184541	-0.162751	-0.212286	-0.113217	-0.027622	NaN	NaN
ADPSBQ	ENSG00000106123.7	7_142552547_A_G_b37	7_142109744_G_T_b37	Independent	-3.13339	-26.1968	5.39559	-0.377162	-0.534166	-0.220158	-0.295173	-0.666455	0.076109	-0.672335	NaN	NaN
ADPSBQ	ENSG00000213214.3	7_143865070_C_T_b37	7_143858397_C_A_b37	Independent	5.67332	NaN	NaN	-3.74276	-4.13995	-3.34557	-0.448548	-0.635459	-0.261637	-4.19131	NaN	NaN
ADPSBQ	ENSG00000228960.4	7_144170550_C_T_b37	7_143953332_A_G_b37	Independent	4.89422	NaN	NaN	1.74079	1.13593	2.34564	1.01072	0.643407	1.37803	2.75151	NaN	NaN
ADPSBQ	ENSG00000212807.1	7_144222927_T_C_b37	7_143877476_A_G_b37	Independent	3.56798	NaN	NaN	-0.560639	-0.830563	-0.290716	-0.504308	-0.786109	-0.222508	-1.06495	NaN	NaN
ADPSBQ	ENSG00000197558.7	7_148643677_A_G_b37	7_149462523_C_G_b37	Independent	5.23224	NaN	NaN	0.602821	0.433802	0.771841	-0.794967	-1.80689	0.216954	-0.192146	NaN	NaN
ADPSBQ	ENSG00000204946.5	7_148966202_C_T_b37	7_149016100_C_G_b37	Independent	5.51024	NaN	NaN	-0.277114	-0.346377	-0.207851	-0.156704	-0.211819	-0.101588	-0.433817	NaN	NaN
ADPSBQ	ENSG00000106479.6	7_149325944_G_A_b37	7_149539084_T_G_b37	Independent	5.09428	NaN	NaN	-0.104847	-0.158354	-0.0513402	-0.274243	-0.381704	-0.166783	-0.37909	NaN	NaN
ADPSBQ	ENSG00000106565.13	7_150478385_C_T_b37	7_150512790_TC_T_b37	Independent	5.57994	NaN	NaN	-0.670429	-0.859371	-0.481486	-0.436798	-0.600106	-0.27349	-1.10723	NaN	NaN
ADPSBQ	ENSG00000261455.1	7_152156146_G_A_b37	7_152162064_A_C_b37	Independent	5.62762	NaN	NaN	-0.48005	-0.571163	-0.388937	-0.688598	-0.941365	-0.43583	-1.16865	NaN	NaN
ADPSBQ	ENSG00000164880.11	7_1527735_G_A_b37	7_1522175_A_G_b37	Independent	5.44674	NaN	NaN	-0.154671	-0.211778	-0.0975638	-0.158164	-0.217769	-0.0985595	-0.312835	NaN	NaN
ADPSBQ	ENSG00000182648.7	7_156467828_C_A_b37	7_156433243_C_G_b37	Independent	5.63479	NaN	NaN	0.517856	0.364587	0.671125	0.403339	0.254293	0.552385	0.921195	NaN	NaN
ADPSBQ	ENSG00000126870.11	7_158691417_G_A_b37	7_158711643_AT_A_b37	Independent	5.67332	NaN	NaN	-0.19113	-0.264696	-0.117563	0.403836	0.311041	0.496631	0.212706	NaN	NaN
ADPSBQ	ENSG00000122687.13	7_2266384_A_G_b37	7_2268540_T_C_b37	Independent	5.65948	NaN	NaN	0.135518	0.0928661	0.17817	0.3749	0.238227	0.511574	0.510418	NaN	NaN
ADPSBQ	ENSG00000226816.2	7_23180132_C_T_b37	7_23242303_C_G_b37	Independent	5.64545	NaN	NaN	0.939934	0.72291	1.15696	2.09158	1.7008	2.48236	3.03152	NaN	NaN
ADPSBQ	ENSG00000070882.8	7_24978096_G_A_b37	7_25022961_CTCAA_C_b37	Independent	5.62402	NaN	NaN	-0.440174	-0.572252	-0.308096	0.566744	0.310035	0.823453	0.12657	NaN	NaN
ADPSBQ	ENSG00000086300.11	7_26397239_C_A_b37	7_26369836_A_AG_b37	Independent	5.25618	NaN	NaN	1.1877	0.976218	1.39919	0.420478	0.232066	0.60889	1.60818	NaN	NaN
ADPSBQ	ENSG00000214870.4	7_26438699_G_A_b37	7_26519002_C_T_b37	Independent	5.66289	NaN	NaN	-0.506088	-0.645896	-0.366279	-0.59487	-0.833161	-0.356579	-1.10096	NaN	NaN
ADPSBQ	ENSG00000233429.5	7_27138754_T_G_b37	7_27138829_G_A_b37	Independent	5.56068	NaN	NaN	-0.585288	-0.697991	-0.472584	-0.350098	-0.506785	-0.19341	-0.935385	NaN	NaN
ADPSBQ	ENSG00000272568.1	7_29039409_A_G_b37	7_28996220_G_A_b37	Independent	4.67708	NaN	NaN	0.80846	0.52586	1.09106	0.607341	0.376899	0.837783	1.4158	NaN	NaN
ADPSBQ	ENSG00000196295.7	7_30651938_G_A_b37	7_30602561_T_A_b37	Independent	5.56605	NaN	NaN	-0.593617	-0.711667	-0.475568	-0.436511	-0.550873	-0.32215	-1.03013	NaN	NaN
ADPSBQ	ENSG00000217455.4	7_3198213_G_A_b37	7_3206286_T_A_b37	Independent	5.68017	NaN	NaN	-1.04194	-1.54004	-0.543831	0.733787	0.415945	1.05163	-0.30815	NaN	NaN
ADPSBQ	ENSG00000146555.14	7_3350027_G_A_b37	7_3860836_G_A_b37	Independent	5.28848	NaN	NaN	-0.605984	-0.735145	-0.476824	0.320756	0.17742	0.464092	-0.285228	NaN	NaN
ADPSBQ	ENSG00000173852.9	7_34991742_A_AC_b37	7_35344186_A_C_b37	Independent	5.63494	NaN	NaN	-0.140322	-0.201046	-0.0795976	0.224614	0.12814	0.321088	0.0842925	NaN	NaN
ADPSBQ	ENSG00000226102.2	7_35490939_T_G_b37	7_35939418_T_G_b37	Independent	5.65948	NaN	NaN	5.35896	4.73019	5.98774	3.6207	3.13124	4.11016	8.97966	NaN	NaN
ADPSBQ	ENSG00000227191.2	7_38278997_C_T_b37	7_38244778_C_T_b37	Independent	5.66643	NaN	NaN	-1.9228	-2.59756	-1.24803	-0.848792	-1.29066	-0.406926	-2.77159	NaN	NaN
ADPSBQ	ENSG00000106605.6	7_43834639_G_A_b37	7_44080531_C_T_b37	Independent	3.86992	NaN	NaN	0.251943	0.155065	0.34882	0.344539	0.168251	0.520826	0.596481	NaN	NaN
ADPSBQ	ENSG00000239556.2	7_43936137_G_A_b37	7_44080223_C_G_b37	Independent	5.2778	NaN	NaN	0.550812	0.432942	0.668682	0.329601	0.234857	0.424345	0.880413	NaN	NaN
ADPSBQ	ENSG00000122678.10	7_44102940_G_A_b37	7_44111189_T_C_b37	Independent	4.98185	NaN	NaN	0.483673	0.378436	0.58891	-0.174071	-0.246103	-0.102038	0.309602	NaN	NaN
ADPSBQ	ENSG00000136279.14	7_44127371_A_G_b37	7_43701250_G_C_b37	Independent	5.48116	NaN	NaN	0.103802	0.0624169	0.145188	-0.100934	-0.158733	-0.0431359	0.0028678	NaN	NaN
ADPSBQ	ENSG00000272556.1	7_45761194_T_G_b37	7_45756997_C_G_b37	Independent	5.12421	NaN	NaN	-1.29327	-1.51401	-1.07252	-0.598398	-0.783954	-0.412841	-1.89167	NaN	NaN
ADPSBQ	ENSG00000157927.12	7_4812352_T_A_b37	7_4909983_G_A_b37	Independent	5.46855	NaN	NaN	1.00098	0.757642	1.24432	-0.210816	-0.306706	-0.114926	0.790167	NaN	NaN
ADPSBQ	ENSG00000196204.7	7_5035729_G_A_b37	7_5036611_C_G_b37	Independent	-7.15188	-25.864	5.67332	-0.54336	-0.639228	-0.447492	-0.17133	-0.228977	-0.113683	-0.71469	NaN	NaN
ADPSBQ	ENSG00000132436.7	7_50517271_G_A_b37	7_50496841_C_T_b37	Independent	5.69373	NaN	NaN	0.453545	0.370758	0.536331	0.470541	0.344985	0.596096	0.924086	NaN	NaN
ADPSBQ	ENSG00000230733.2	7_5543365_T_C_b37	7_5527839_C_G_b37	Independent	5.3858	NaN	NaN	-0.239198	-0.327811	-0.150585	-0.29476	-0.420081	-0.169439	-0.533958	NaN	NaN
ADPSBQ	ENSG00000129103.13	7_55717617_G_A_b37	7_56091622_T_G_b37	Independent	-2.48739	-28.2602	5.6498	-0.479055	-0.622889	-0.33522	0.150537	0.10027	0.200803	-0.328518	NaN	NaN
ADPSBQ	ENSG00000178665.10	7_55840596_G_A_b37	7_56054675_A_AT_b37	Independent	2.61818	NaN	NaN	0.356218	0.203436	0.509	0.750177	0.523436	0.976918	1.1064	NaN	NaN
ADPSBQ	ENSG00000146729.5	7_56068980_C_T_b37	7_55923629_A_T_b37	Independent	2.56456	NaN	NaN	0.456065	0.353842	0.558289	-0.103562	-0.144132	-0.0629918	0.352503	NaN	NaN
ADPSBQ	ENSG00000086232.8	7_5878784_T_C_b37	7_6109637_A_G_b37	Independent	5.32936	NaN	NaN	-0.0876222	-0.12263	-0.0526141	-0.115463	-0.189185	-0.0417414	-0.203086	NaN	NaN
ADPSBQ	ENSG00000106305.5	7_6026222_C_CTGA_b37	7_6029690_G_GT_b37	Independent	5.56834	NaN	NaN	-0.259259	-0.358594	-0.159924	-0.177251	-0.259409	-0.0950939	-0.43651	NaN	NaN
ADPSBQ	ENSG00000146574.11	7_6116850_T_C_b37	7_6884764_A_C_b37	Independent	4.98702	NaN	NaN	-0.444702	-0.552253	-0.337151	-0.205889	-0.319137	-0.0926421	-0.650591	NaN	NaN
ADPSBQ	ENSG00000234444.5	7_63830695_C_T_b37	7_63288988_CAT_C_b37	Independent	5.64897	NaN	NaN	0.872922	0.621472	1.12437	-0.170629	-0.236289	-0.104968	0.702294	NaN	NaN
ADPSBQ	ENSG00000228653.2	7_64007426_T_A_b37	7_64019108_G_A_b37	Independent	5.57595	NaN	NaN	0.633393	0.450552	0.816234	-0.442871	-0.619876	-0.265866	0.190522	NaN	NaN
ADPSBQ	ENSG00000271550.1	7_64125413_C_T_b37	7_64150849_C_T_b37	Independent	5.69036	NaN	NaN	-1.10592	-1.35967	-0.85216	-0.595046	-0.826717	-0.363376	-1.70096	NaN	NaN
ADPSBQ	ENSG00000213640.3	7_64298532_TG_T_b37	7_64324235_A_G_b37	Independent	5.60212	NaN	NaN	-1.17029	-1.40171	-0.93886	0.782207	0.572099	0.992314	-0.38808	NaN	NaN
ADPSBQ	ENSG00000237181.1	7_644857_A_G_b37	7_119041_G_A_b37	Independent	5.34176	NaN	NaN	-2.00035	-3.40384	-0.596859	-0.252983	-0.395445	-0.110521	-2.25333	NaN	NaN
ADPSBQ	ENSG00000224316.1	7_64542246_G_A_b37	7_65513773_T_C_b37	Independent	3.45124	NaN	NaN	0.638074	0.462357	0.813791	-0.388071	-0.576667	-0.199476	0.250003	NaN	NaN
ADPSBQ	ENSG00000228409.1	7_65443636_A_G_b37	7_65371269_GA_G_b37	Independent	5.57973	NaN	NaN	-0.403776	-0.633471	-0.174082	0.233304	0.11476	0.351847	-0.170473	NaN	NaN
ADPSBQ	ENSG00000136247.10	7_6610529_T_G_b37	7_6617247_C_G_b37	Independent	5.4236	NaN	NaN	0.205197	0.12771	0.282683	-0.175538	-0.269392	-0.0816852	0.0296581	NaN	NaN
ADPSBQ	ENSG00000232559.2	7_66174927_T_A_b37	7_65411976_A_T_b37	Independent	4.25175	NaN	NaN	-0.400181	-0.51306	-0.287303	0.373599	0.246484	0.500714	-0.0265827	NaN	NaN
ADPSBQ	ENSG00000067601.6	7_66670648_C_T_b37	7_66762050_A_T_b37	Independent	5.05709	NaN	NaN	-0.523905	-0.641256	-0.406555	0.367463	0.236434	0.498493	-0.156442	NaN	NaN
ADPSBQ	ENSG00000187953.6	7_6776366_T_C_b37	7_6056484_G_C_b37	Independent	5.58393	NaN	NaN	-0.281297	-0.364938	-0.197656	-0.226267	-0.32382	-0.128713	-0.507564	NaN	NaN
ADPSBQ	ENSG00000185274.7	7_70579487_T_C_b37	7_70672931_T_C_b37	Independent	2.51597	NaN	NaN	-0.641395	-0.856253	-0.426537	0.518801	0.291004	0.746599	-0.122594	NaN	NaN
ADPSBQ	ENSG00000106392.6	7_7277215_C_G_b37	7_7272034_C_T_b37	Independent	5.68017	NaN	NaN	0.368117	0.268651	0.467582	0.592261	0.486345	0.698178	0.960378	NaN	NaN
ADPSBQ	ENSG00000225969.1	7_73149302_G_A_b37	7_73273802_C_T_b37	Independent	3.87387	NaN	NaN	-2.12563	-2.3402	-1.91106	-0.810727	-1.08638	-0.535077	-2.93635	NaN	NaN
ADPSBQ	ENSG00000106077.14	7_73196828_G_A_b37	7_73149232_TGA_T_b37	Independent	5.1337	NaN	NaN	-0.213559	-0.295456	-0.131662	0.177786	0.0960331	0.259539	-0.0357732	NaN	NaN
ADPSBQ	ENSG00000189143.8	7_73242275_G_C_b37	7_73361379_T_C_b37	Independent	2.04737	NaN	NaN	-1.04136	-1.3074	-0.775321	2.39709	1.48166	3.31252	1.35573	NaN	NaN
ADPSBQ	ENSG00000160828.13	7_74140925_G_C_b37	7_74359066_G_A_b37	Independent	3.44012	NaN	NaN	-1.06957	-1.34697	-0.792177	-0.420307	-0.547692	-0.292921	-1.48988	NaN	NaN
ADPSBQ	ENSG00000189011.9	7_75053572_G_A_b37	7_74297908_C_G_b37	Independent	2.38138	NaN	NaN	0.793248	0.543707	1.04279	0.807305	0.315544	1.29907	1.60055	NaN	NaN
ADPSBQ	ENSG00000178809.7	7_75097488_A_G_b37	7_75070642_C_T_b37	Independent	4.17768	NaN	NaN	-0.286416	-0.493198	-0.0796336	-0.610716	-0.997802	-0.223631	-0.897132	NaN	NaN
ADPSBQ	ENSG00000205583.9	7_75100124_T_C_b37	7_75101065_C_T_b37	Independent	5.65249	NaN	NaN	0.509632	0.393086	0.626178	-0.365614	-0.501929	-0.229298	0.144018	NaN	NaN
ADPSBQ	ENSG00000106178.2	7_75449338_T_G_b37	7_76154111_C_G_b37	Independent	5.54518	NaN	NaN	-0.918792	-1.25972	-0.577863	5.38494	3.22718	7.5427	4.46615	NaN	NaN
ADPSBQ	ENSG00000127952.12	7_75744263_A_AAC_b37	7_75714883_T_C_b37	Independent	5.67675	NaN	NaN	1.14056	0.980232	1.30089	-0.481364	-0.588516	-0.374212	0.659196	NaN	NaN
ADPSBQ	ENSG00000188372.10	7_76060232_G_A_b37	7_76209459_A_G_b37	Independent	-3.06981	-42.6803	5.68698	1.66775	1.53617	1.79933	0.692677	0.499135	0.886219	2.36042	NaN	NaN
ADPSBQ	ENSG00000243566.2	7_76131061_C_T_b37	7_76194028_C_T_b37	Independent	5.57215	NaN	NaN	-0.784024	-0.993347	-0.5747	0.611404	0.408262	0.814547	-0.172619	NaN	NaN
ADPSBQ	ENSG00000186704.8	7_76140449_C_T_b37	7_76568600_T_C_b37	Independent	4.592	NaN	NaN	-0.352212	-0.515404	-0.18902	0.22964	0.109636	0.349643	-0.122572	NaN	NaN
ADPSBQ	ENSG00000205485.9	7_76254441_C_G_b37	7_76223662_G_A_b37	Independent	5.33754	NaN	NaN	1.181	0.801448	1.56055	0.259791	0.132247	0.387335	1.44079	NaN	NaN
ADPSBQ	ENSG00000272732.1	7_7632501_G_A_b37	7_7590175_C_A_b37	Independent	5.69373	NaN	NaN	1.46494	1.02363	1.90625	0.385607	0.228011	0.543204	1.85055	NaN	NaN
ADPSBQ	ENSG00000233448.2	7_76572633_G_C_b37	7_76594213_A_G_b37	Independent	4.93397	NaN	NaN	-0.335452	-0.616518	-0.0543855	0.754767	0.508564	1.00097	0.419316	NaN	NaN
ADPSBQ	ENSG00000242435.1	7_76577533_A_G_b37	7_76616261_C_T_b37	Independent	4.65072	NaN	NaN	0.633597	0.405449	0.861745	-0.700049	-1.01555	-0.384545	-0.0664526	NaN	NaN
ADPSBQ	ENSG00000205482.7	7_76750190_G_A_b37	7_76681827_G_A_b37	Independent	5.36404	NaN	NaN	0.635567	0.443676	0.827459	0.292937	0.151874	0.434	0.928504	NaN	NaN
ADPSBQ	ENSG00000127947.11	7_77201858_TTTG_T_b37	7_77126642_C_T_b37	Independent	5.63479	NaN	NaN	0.660295	0.337246	0.983345	-0.156802	-0.212599	-0.101005	0.503493	NaN	NaN
ADPSBQ	ENSG00000214293.4	7_77308295_A_G_b37	7_77309782_A_AATAATG_b37	Independent	5.68358	NaN	NaN	-0.622621	-0.733472	-0.511771	-0.238626	-0.309954	-0.167298	-0.861247	NaN	NaN
ADPSBQ	ENSG00000219545.5	7_7917577_G_A_b37	7_7787836_A_G_b37	Independent	4.55822	NaN	NaN	-0.15193	-0.218933	-0.0849264	-0.335404	-0.484737	-0.186071	-0.487333	NaN	NaN
ADPSBQ	ENSG00000135218.13	7_80316261_G_A_b37	7_80294810_T_C_b37	Independent	2.22756	NaN	NaN	-1.37831	-2.19567	-0.560949	1.04472	0.606792	1.48265	-0.333589	NaN	NaN
ADPSBQ	ENSG00000182165.13	7_86790771_T_G_b37	7_86966841_C_CA_b37	Independent	5.68358	NaN	NaN	-0.548074	-0.728786	-0.367362	0.280761	0.130428	0.431094	-0.267313	NaN	NaN
ADPSBQ	ENSG00000157259.6	7_92179229_G_T_b37	7_92196737_C_T_b37	Independent	5.69036	NaN	NaN	-0.25301	-0.307037	-0.198984	-0.413185	-0.591581	-0.23479	-0.666196	NaN	NaN
ADPSBQ	ENSG00000127995.12	7_95015220_TTAAAGCAGTGTG_T_b37	7_94139685_G_A_b37	Independent	5.65414	NaN	NaN	-0.218167	-0.302692	-0.133641	0.115788	0.0570863	0.17449	-0.102378	NaN	NaN
ADPSBQ	ENSG00000070669.12	7_97611339_C_T_b37	7_97599835_C_T_b37	Independent	3.29338	NaN	NaN	0.293236	0.158791	0.427682	-0.237973	-0.375609	-0.100337	0.0552635	NaN	NaN
ADPSBQ	ENSG00000272782.1	7_97937981_T_A_b37	7_98023153_T_C_b37	Independent	5.35434	NaN	NaN	0.99305	0.791776	1.19432	-0.477355	-0.606809	-0.347901	0.515695	NaN	NaN
ADPSBQ	ENSG00000272950.1	7_97984321_TG_T_b37	7_97965821_G_C_b37	Independent	5.67332	NaN	NaN	-2.03845	-2.34402	-1.73288	-0.652956	-0.872527	-0.433384	-2.6914	NaN	NaN
ADPSBQ	ENSG00000242611.1	7_98998_TAA_T_b37	7_42038_G_C_b37	Independent	5.65692	NaN	NaN	1.2083	0.865458	1.55113	-0.821816	-1.14498	-0.498654	0.386479	NaN	NaN
ADPSBQ	ENSG00000244219.2	7_99180570_AG_A_b37	7_99101503_C_T_b37	Independent	5.68698	NaN	NaN	-1.10363	-1.42406	-0.783199	0.546029	0.261894	0.830164	-0.5576	NaN	NaN
ADPSBQ	ENSG00000197093.6	7_99307413_A_G_b37	7_99929614_C_T_b37	Independent	4.88911	NaN	NaN	0.393296	0.187581	0.599011	-0.385099	-0.748917	-0.0212818	0.0081966	NaN	NaN
ADPSBQ	ENSG00000166997.3	7_99484204_AACATTTG_A_b37	7_99648959_T_C_b37	Independent	4.30264	NaN	NaN	-0.274917	-0.346302	-0.203533	-0.242885	-0.368449	-0.11732	-0.517802	NaN	NaN
ADPSBQ	ENSG00000078487.13	7_99553167_C_G_b37	7_99935097_G_A_b37	Independent	4.86993	NaN	NaN	0.247379	0.148228	0.346531	0.153022	0.0658418	0.240202	0.400401	NaN	NaN
ADPSBQ	ENSG00000213413.2	7_99782124_T_C_b37	7_100004394_C_T_b37	Independent	5.63479	NaN	NaN	0.590734	0.418405	0.763063	0.870952	0.332494	1.40941	1.46169	NaN	NaN
ADPSBQ	ENSG00000121716.14	7_99934192_T_C_b37	7_99967644_G_A_b37	Independent	-1.80119	-15.5245	5.63121	0.16534	0.0484853	0.282194	0.558397	0.434239	0.682555	0.723737	NaN	NaN
ADPSBQ	ENSG00000164924.13	8_101937455_T_C_b37	8_101943404_A_C_b37	Independent	5.69373	NaN	NaN	-0.258811	-0.306262	-0.21136	0.255096	0.163452	0.34674	-0.00371438	NaN	NaN
ADPSBQ	ENSG00000253641.1	8_10325188_C_A_b37	8_10285810_T_C_b37	Independent	3.60951	NaN	NaN	-0.613299	-0.812353	-0.414245	-0.817073	-1.13264	-0.50151	-1.43037	NaN	NaN
ADPSBQ	ENSG00000253649.1	8_10352230_T_C_b37	8_10291730_G_C_b37	Independent	5.38931	NaN	NaN	0.533664	0.358757	0.708571	-0.530323	-0.764557	-0.296089	0.00334129	NaN	NaN
ADPSBQ	ENSG00000079459.8	8_10863221_G_C_b37	8_11666451_C_T_b37	Independent	5.64545	NaN	NaN	0.191197	0.114305	0.268089	0.578324	0.309152	0.847497	0.769521	NaN	NaN
ADPSBQ	ENSG00000255354.1	8_11332964_G_C_b37	8_11567833_T_C_b37	Independent	5.30628	NaN	NaN	-0.318772	-0.474776	-0.162768	0.436948	0.194035	0.679861	0.118176	NaN	NaN
ADPSBQ	ENSG00000104447.7	8_116032721_A_G_b37	8_117405305_T_A_b37	Independent	5.52424	NaN	NaN	0.51351	0.290573	0.736446	-0.624064	-0.940173	-0.307954	-0.110554	NaN	NaN
ADPSBQ	ENSG00000255495.1	8_11795693_C_CTAA_b37	8_12580568_G_A_b37	Independent	0.823943	NaN	NaN	1.00968	0.755568	1.26379	0.922992	0.532328	1.31366	1.93267	NaN	NaN
ADPSBQ	ENSG00000147679.7	8_118195159_A_G_b37	8_118245643_T_C_b37	Independent	5.66988	NaN	NaN	0.104963	0.0543821	0.155543	0.238661	0.0296032	0.44772	0.343624	NaN	NaN
ADPSBQ	ENSG00000147676.9	8_120229252_A_G_b37	8_120215216_GTTTCTA_G_b37	Independent	4.16638	NaN	NaN	2.00877	1.76945	2.2481	1.15305	0.846091	1.46	3.16182	NaN	NaN
ADPSBQ	ENSG00000270074.1	8_12521514_T_C_b37	8_12678232_G_A_b37	Independent	1.10779	NaN	NaN	-1.01028	-1.9641	-0.0564594	0.204297	-0.262922	0.671515	-0.805983	NaN	NaN
ADPSBQ	ENSG00000168672.3	8_127483607_T_C_b37	8_127489030_A_G_b37	Independent	5.21612	NaN	NaN	0.227378	0.118928	0.335828	-0.323464	-0.473207	-0.173721	-0.0960858	NaN	NaN
ADPSBQ	ENSG00000171045.10	8_143408281_C_G_b37	8_143484726_T_C_b37	Independent	4.9709	NaN	NaN	-0.196138	-0.268585	-0.123691	0.276261	0.205505	0.347016	0.0801226	NaN	NaN
ADPSBQ	ENSG00000253716.1	8_144312990_A_G_b37	8_144364579_G_A_b37	Independent	5.4211	NaN	NaN	-0.57506	-0.683269	-0.46685	-0.19874	-0.307789	-0.0896909	-0.7738	NaN	NaN
ADPSBQ	ENSG00000158106.8	8_144447355_A_G_b37	8_144402864_G_A_b37	Independent	4.25891	NaN	NaN	0.439221	0.324636	0.553806	0.74084	0.385182	1.0965	1.18006	NaN	NaN
ADPSBQ	ENSG00000254859.1	8_144631338_T_C_b37	8_144596722_G_A_b37	Independent	5.66988	NaN	NaN	-2.16766	-2.43084	-1.90449	-0.869721	-1.1964	-0.543044	-3.03738	NaN	NaN
ADPSBQ	ENSG00000014164.6	8_144633728_A_G_b37	8_144556836_G_A_b37	Independent	5.4934	NaN	NaN	-0.765327	-0.836373	-0.694281	-0.143566	-0.220516	-0.0666167	-0.908894	NaN	NaN
ADPSBQ	ENSG00000204839.4	8_144656765_G_A_b37	8_144657269_G_C_b37	Independent	5.60212	NaN	NaN	-1.09389	-1.31942	-0.868351	0.666417	0.419284	0.913549	-0.42747	NaN	NaN
ADPSBQ	ENSG00000255050.1	8_144664818_C_T_b37	8_144676862_C_T_b37	Independent	5.39332	NaN	NaN	0.718234	0.592744	0.843724	0.334955	0.211047	0.458862	1.05319	NaN	NaN
ADPSBQ	ENSG00000214597.4	8_145577824_C_G_b37	8_145635313_C_T_b37	Independent	-0.632849	-21.2095	5.6204	0.840358	0.585008	1.09571	0.464897	0.202615	0.727179	1.30525	NaN	NaN
ADPSBQ	ENSG00000182325.6	8_145589498_G_C_b37	8_145657369_C_A_b37	Independent	5.6058	NaN	NaN	0.307623	0.242887	0.372359	-0.435102	-0.6812	-0.189003	-0.127478	NaN	NaN
ADPSBQ	ENSG00000160948.9	8_145618154_C_CACCTGTG_b37	8_145642886_C_T_b37	Independent	5.58725	NaN	NaN	0.492946	0.4019	0.583991	0.30181	0.135862	0.467759	0.794756	NaN	NaN
ADPSBQ	ENSG00000071894.10	8_145623098_T_C_b37	8_145603114_A_C_b37	Independent	5.69373	NaN	NaN	-0.6228	-0.70441	-0.541191	-0.532367	-0.619746	-0.444987	-1.15517	NaN	NaN
ADPSBQ	ENSG00000198169.4	8_146149189_AT_A_b37	8_145240102_G_A_b37	Independent	5.58612	NaN	NaN	-0.107909	-0.163264	-0.0525545	-0.515886	-0.748703	-0.283069	-0.623795	NaN	NaN
ADPSBQ	ENSG00000253982.1	8_1711275_T_C_b37	8_1710977_A_C_b37	Independent	5.69036	NaN	NaN	0.345058	0.24142	0.448696	0.483444	0.347414	0.619474	0.828502	NaN	NaN
ADPSBQ	ENSG00000129422.9	8_17555263_A_C_b37	8_17505497_G_A_b37	Independent	5.6771	NaN	NaN	0.411967	0.258653	0.565282	-0.189242	-0.271964	-0.10652	0.222725	NaN	NaN
ADPSBQ	ENSG00000078674.13	8_17888606_A_G_b37	8_17796871_A_C_b37	Independent	5.62401	NaN	NaN	0.136148	0.0834237	0.188873	-0.236477	-0.295014	-0.177939	-0.100328	NaN	NaN
ADPSBQ	ENSG00000147408.10	8_19361290_A_AGT_b37	8_19315034_G_T_b37	Independent	5.67332	NaN	NaN	0.413853	0.307895	0.519811	-1.07925	-1.56376	-0.594742	-0.6654	NaN	NaN
ADPSBQ	ENSG00000197181.7	8_22158150_A_G_b37	8_22132864_CCT_C_b37	Independent	5.67675	NaN	NaN	-0.685713	-0.874461	-0.496966	-0.726004	-0.96465	-0.487358	-1.41172	NaN	NaN
ADPSBQ	ENSG00000228451.3	8_26267362_A_C_b37	8_26239383_C_A_b37	Independent	5.69373	NaN	NaN	-0.655533	-0.84372	-0.467346	0.552891	0.413577	0.692204	-0.102642	NaN	NaN
ADPSBQ	ENSG00000120907.13	8_26523628_T_A_b37	8_26696715_G_A_b37	Independent	3.72398	NaN	NaN	-1.97738	-2.39035	-1.5644	-0.905144	-1.32006	-0.490227	-2.88252	NaN	NaN
ADPSBQ	ENSG00000104331.4	8_58001797_T_C_b37	8_56943907_C_T_b37	Independent	1.74462	NaN	NaN	0.130007	0.0458462	0.214167	-0.401434	-0.655614	-0.147254	-0.271427	NaN	NaN
ADPSBQ	ENSG00000215114.3	8_59724602_G_A_b37	8_59323811_A_G_b37	Independent	5.69371	NaN	NaN	-0.23757	-0.320226	-0.154913	0.171278	0.107327	0.235229	-0.0662915	NaN	NaN
ADPSBQ	ENSG00000178538.5	8_61096100_T_G_b37	8_61197710_C_T_b37	Independent	4.41367	NaN	NaN	0.584472	0.410226	0.758718	0.693227	0.439695	0.946758	1.2777	NaN	NaN
ADPSBQ	ENSG00000066855.11	8_66494721_AAGAAGG_A_b37	8_66575109_A_C_b37	Independent	5.48252	NaN	NaN	0.436116	0.318665	0.553567	-0.211489	-0.303997	-0.118981	0.224627	NaN	NaN
ADPSBQ	ENSG00000164825.3	8_6734378_AC_A_b37	8_6722161_G_A_b37	Independent	0.930195	NaN	NaN	-2.19629	-2.51866	-1.87391	-1.08849	-1.4414	-0.735581	-3.28478	NaN	NaN
ADPSBQ	ENSG00000253317.1	8_72721431_T_G_b37	8_73067885_C_G_b37	Independent	4.98131	NaN	NaN	-0.699868	-0.985238	-0.414498	-0.596695	-1.40897	0.215581	-1.29656	NaN	NaN
ADPSBQ	ENSG00000175606.6	8_74890431_T_C_b37	8_75573331_T_C_b37	Independent	2.57594	NaN	NaN	0.29109	0.103551	0.478628	-0.255263	-0.387904	-0.122622	0.0358262	NaN	NaN
ADPSBQ	ENSG00000253981.1	8_8122420_C_G_b37	8_7950232_A_G_b37	Independent	5.59472	NaN	NaN	-6.64385	-101.294	88.0066	0.503351	0.315114	0.691589	-6.1405	NaN	NaN
ADPSBQ	ENSG00000104497.9	8_82735520_T_C_b37	8_82792914_C_T_b37	Independent	5.67969	NaN	NaN	0.821134	0.74567	0.896597	0.287671	0.196157	0.379184	1.1088	NaN	NaN
ADPSBQ	ENSG00000176623.7	8_87524953_A_AGTAGGCAATCAGGAT_b37	8_87375982_A_G_b37	Independent	5.63479	NaN	NaN	0.170274	0.13255	0.207998	-0.157604	-0.251627	-0.0635801	0.0126702	NaN	NaN
ADPSBQ	ENSG00000156103.11	8_89089426_T_C_b37	8_89399149_G_A_b37	Independent	4.30621	NaN	NaN	-0.629775	-0.801969	-0.457581	-0.624875	-0.893215	-0.356535	-1.25465	NaN	NaN
ADPSBQ	ENSG00000123119.7	8_91925599_T_TC_b37	8_90921779_T_C_b37	Independent	3.40343	NaN	NaN	-0.290853	-0.426697	-0.155009	1.07184	0.710641	1.43305	0.78099	NaN	NaN
ADPSBQ	ENSG00000177459.6	8_98363435_G_A_b37	8_98294452_A_G_b37	Independent	5.61343	NaN	NaN	0.835435	0.55955	1.11132	-0.680738	-1.04386	-0.317611	0.154698	NaN	NaN
ADPSBQ	ENSG00000119509.8	9_103055938_G_A_b37	9_102806266_T_C_b37	Independent	5.67319	NaN	NaN	-0.109148	-0.16109	-0.057206	0.243922	0.154323	0.33352	0.134774	NaN	NaN
ADPSBQ	ENSG00000173253.10	9_1047536_C_T_b37	9_1062815_T_A_b37	Independent	4.86146	NaN	NaN	0.916696	0.642486	1.19091	0.464015	0.285647	0.642383	1.38071	NaN	NaN
ADPSBQ	ENSG00000136783.9	9_107524390_C_T_b37	9_107512431_G_A_b37	Independent	5.25475	NaN	NaN	0.337644	0.275293	0.399996	-0.170757	-0.237915	-0.1036	0.166887	NaN	NaN
ADPSBQ	ENSG00000226334.1	9_107690057_C_A_b37	9_107691645_G_A_b37	Independent	5.69373	NaN	NaN	-1.79309	-2.01733	-1.56884	-0.773426	-1.07081	-0.476045	-2.56651	NaN	NaN
ADPSBQ	ENSG00000119326.10	9_111784157_AAAGT_A_b37	9_111784972_C_G_b37	Independent	5.69373	NaN	NaN	-0.784379	-0.929956	-0.638802	1.46189	1.2117	1.71208	0.677508	NaN	NaN
ADPSBQ	ENSG00000106771.8	9_111904758_C_T_b37	9_111824040_G_A_b37	Independent	4.87977	NaN	NaN	0.258811	0.167389	0.350234	0.180621	0.121596	0.239645	0.439432	NaN	NaN
ADPSBQ	ENSG00000173258.8	9_114267309_C_T_b37	9_113828759_C_A_b37	Independent	5.24374	NaN	NaN	-0.448494	-0.588381	-0.308607	-0.50176	-0.702613	-0.300906	-0.950254	NaN	NaN
ADPSBQ	ENSG00000242616.3	9_114434070_A_G_b37	9_114777545_G_A_b37	Independent	5.14008	NaN	NaN	-0.41236	-0.460414	-0.364306	-0.320095	-0.472008	-0.168181	-0.732455	NaN	NaN
ADPSBQ	ENSG00000119431.5	9_116141399_CTG_C_b37	9_116138460_C_T_b37	Independent	5.53339	NaN	NaN	-0.319877	-0.438256	-0.201498	-2.42589	-4.22478	-0.626995	-2.74576	NaN	NaN
ADPSBQ	ENSG00000148218.11	9_116167156_A_T_b37	9_116150109_G_A_b37	Independent	4.84092	NaN	NaN	0.236291	0.168543	0.304039	0.14133	0.0716572	0.211003	0.377621	NaN	NaN
ADPSBQ	ENSG00000228914.1	9_125167885_G_C_b37	9_125178369_G_T_b37	Independent	5.52146	NaN	NaN	1.46407	1.15992	1.76821	-0.485119	-0.710837	-0.259402	0.97895	NaN	NaN
ADPSBQ	ENSG00000136944.13	9_129469990_A_G_b37	9_129379230_G_C_b37	Independent	2.278	NaN	NaN	-0.481672	-0.662686	-0.300658	0.388627	0.220851	0.556403	-0.0930447	NaN	NaN
ADPSBQ	ENSG00000136856.13	9_130173224_T_C_b37	9_130252250_G_C_b37	Independent	5.23542	NaN	NaN	-0.375084	-0.455275	-0.294894	-0.192945	-0.275269	-0.11062	-0.568029	NaN	NaN
ADPSBQ	ENSG00000197958.8	9_130219669_C_T_b37	9_130266088_G_A_b37	Independent	4.99845	NaN	NaN	0.364304	0.306488	0.42212	-0.133811	-0.191955	-0.075667	0.230493	NaN	NaN
ADPSBQ	ENSG00000167123.14	9_131180886_T_TG_b37	9_131992020_G_A_b37	Independent	1.61958	NaN	NaN	0.36437	0.202457	0.526283	0.636246	0.309795	0.962697	1.00062	NaN	NaN
ADPSBQ	ENSG00000167113.6	9_131289337_C_T_b37	9_131509221_A_T_b37	Independent	5.62762	NaN	NaN	-0.487698	-0.6702	-0.305197	-0.245006	-0.378975	-0.111036	-0.732704	NaN	NaN
ADPSBQ	ENSG00000175287.14	9_131696692_A_G_b37	9_131683644_C_T_b37	Independent	5.60947	NaN	NaN	-1.55389	-2.06861	-1.03917	-0.317168	-0.430312	-0.204024	-1.87106	NaN	NaN
ADPSBQ	ENSG00000197859.5	9_136171812_A_G_b37	9_136184903_G_A_b37	Independent	5.17615	NaN	NaN	-0.667307	-1.24981	-0.0848031	-0.582053	-0.878071	-0.286034	-1.24936	NaN	NaN
ADPSBQ	ENSG00000148290.5	9_136237539_C_G_b37	9_136241189_C_T_b37	Independent	5.67332	NaN	NaN	-0.424243	-0.472968	-0.375517	0.444111	0.356284	0.531937	0.0198679	NaN	NaN
ADPSBQ	ENSG00000123453.12	9_136603203_A_T_b37	9_136600588_T_C_b37	Independent	5.63836	NaN	NaN	1.57169	1.31213	1.83126	-0.546105	-0.794464	-0.297746	1.02559	NaN	NaN
ADPSBQ	ENSG00000225756.1	9_136603852_C_T_b37	9_136710597_G_A_b37	Independent	2.70594	NaN	NaN	0.773741	0.523977	1.02351	-1.89078	-3.01253	-0.769023	-1.11704	NaN	NaN
ADPSBQ	ENSG00000160339.11	9_137820663_C_A_b37	9_137755617_C_T_b37	Independent	-1.83865	-20.2319	5.59625	-1.39265	-2.10254	-0.682753	-0.538797	-0.779462	-0.298131	-1.93144	NaN	NaN
ADPSBQ	ENSG00000165684.3	9_139392497_GGCT_G_b37	9_139351737_G_A_b37	Independent	5.67332	NaN	NaN	0.415672	0.287761	0.543584	-0.51942	-0.749919	-0.28892	-0.103747	NaN	NaN
ADPSBQ	ENSG00000176978.9	9_140006753_C_A_b37	9_140004959_C_T_b37	Independent	5.66296	NaN	NaN	-0.220416	-0.278924	-0.161908	-0.710301	-1.04362	-0.376983	-0.930717	NaN	NaN
ADPSBQ	ENSG00000177239.10	9_140008750_G_C_b37	9_139958583_C_G_b37	Independent	4.70877	NaN	NaN	-0.134987	-0.190694	-0.0792805	-0.101767	-0.152269	-0.0512651	-0.236755	NaN	NaN
ADPSBQ	ENSG00000272871.1	9_14694059_C_G_b37	9_14627933_A_AC_b37	Independent	-1.86044	-13.5765	5.35917	0.476238	0.331682	0.620795	0.267581	0.129618	0.405545	0.74382	NaN	NaN
ADPSBQ	ENSG00000164975.11	9_14897030_C_T_b37	9_15467956_TA_T_b37	Independent	5.18901	NaN	NaN	-0.234719	-0.348172	-0.121265	-0.313913	-0.475493	-0.152333	-0.548632	NaN	NaN
ADPSBQ	ENSG00000164989.11	9_15900348_G_T_b37	9_15581329_A_G_b37	Independent	4.90136	NaN	NaN	0.59422	0.429358	0.759082	0.244049	0.146896	0.341203	0.838269	NaN	NaN
ADPSBQ	ENSG00000137154.8	9_19380239_A_T_b37	9_19360559_T_TACA_b37	Independent	5.66988	NaN	NaN	-0.145453	-0.203774	-0.0871326	0.201053	0.133821	0.268286	0.0555999	NaN	NaN
ADPSBQ	ENSG00000234840.1	9_22742338_T_C_b37	9_22759558_C_A_b37	Independent	2.88857	NaN	NaN	-1.0608	-1.32683	-0.794761	-1.90331	-2.23065	-1.57598	-2.96411	NaN	NaN
ADPSBQ	ENSG00000224549.1	9_22767164_C_A_b37	9_22757714_A_C_b37	Independent	4.12897	NaN	NaN	-1.92913	-2.18843	-1.66982	-0.976179	-1.26323	-0.689127	-2.9053	NaN	NaN
ADPSBQ	ENSG00000198680.3	9_25681415_C_T_b37	9_25639379_A_G_b37	Independent	2.18927	NaN	NaN	-0.219069	-0.281653	-0.156485	-0.432954	-0.712802	-0.153106	-0.652023	NaN	NaN
ADPSBQ	ENSG00000174482.6	9_27789455_A_G_b37	9_28917293_C_T_b37	Independent	5.33851	NaN	NaN	-1.68716	-2.31845	-1.05587	0.790538	0.468705	1.11237	-0.89662	NaN	NaN
ADPSBQ	ENSG00000230074.1	9_34683607_C_A_b37	9_34673530_T_C_b37	Independent	5.68698	NaN	NaN	0.833402	0.680199	0.986605	0.539302	0.359463	0.719141	1.3727	NaN	NaN
ADPSBQ	ENSG00000137135.13	9_35638778_C_A_b37	9_35659107_C_T_b37	Independent	5.4076	NaN	NaN	-0.68352	-0.865556	-0.501483	0.258034	0.144258	0.37181	-0.425486	NaN	NaN
ADPSBQ	ENSG00000196196.2	9_35906471_C_T_b37	9_35904946_G_A_b37	Independent	-5.21331	-31.8057	3.66323	-1.70248	-2.4072	-0.997759	0.626846	0.345289	0.908403	-1.07564	NaN	NaN
ADPSBQ	ENSG00000269788.1	9_43497098_G_C_b37	9_44009181_A_T_b37	Independent	4.26268	NaN	NaN	0	NaN	NaN	0.114263	NaN	NaN	0.114263	NaN	NaN
ADPSBQ	ENSG00000236816.2	9_44119308_T_C_b37	9_44168650_A_C_b37	Independent	5.41165	NaN	NaN	-2.68318	-3.04307	-2.32329	-1.27307	-2.62527	0.0791342	-3.95625	NaN	NaN
ADPSBQ	ENSG00000120217.9	9_5495897_C_T_b37	9_5496519_G_A_b37	Independent	1.588	NaN	NaN	1.04356	0.750973	1.33614	-0.673967	-0.982355	-0.365578	0.36959	NaN	NaN
ADPSBQ	ENSG00000232833.4	9_68298692_C_G_b37	9_68252156_C_A_b37	Independent	5.6204	NaN	NaN	0.119932	NaN	NaN	0.119932	NaN	NaN	0.239863	NaN	NaN
ADPSBQ	ENSG00000181997.8	9_69093895_TAG_T_b37	9_69938047_C_T_b37	Independent	3.74012	NaN	NaN	-6.64386	-629.381	616.093	0.953628	-3.91505	5.82231	-5.69023	NaN	NaN
ADPSBQ	ENSG00000225434.2	9_74673665_T_C_b37	9_74916092_G_A_b37	Independent	2.90257	NaN	NaN	2.13002	1.97493	2.28511	1.27838	0.750414	1.80634	3.4084	NaN	NaN
ADPSBQ	ENSG00000064218.4	9_780513_G_A_b37	9_1000439_C_G_b37	Independent	2.69963	NaN	NaN	-0.579113	-0.853371	-0.304856	-0.597164	-0.795681	-0.398648	-1.17628	NaN	NaN
ADPSBQ	ENSG00000197969.7	9_79978538_GT_G_b37	9_79927452_C_G_b37	Independent	3.56293	NaN	NaN	-0.285664	-0.387025	-0.184302	0.522834	0.392902	0.652766	0.237171	NaN	NaN
ADPSBQ	ENSG00000137038.7	9_8601507_A_T_b37	9_7800651_T_C_b37	Independent	5.02442	NaN	NaN	-0.105788	-0.147382	-0.0641942	0.242638	0.140374	0.344902	0.13685	NaN	NaN
ADPSBQ	ENSG00000165121.10	9_88366023_G_A_b37	9_88387542_C_G_b37	Independent	3.10296	NaN	NaN	1.69327	1.41643	1.97011	-1.38608	-1.75686	-1.01531	0.307185	NaN	NaN
ADPSBQ	ENSG00000225706.1	9_8858303_C_G_b37	9_8858350_G_A_b37	Independent	5.46806	NaN	NaN	1.59779	1.29944	1.89613	-0.843721	-1.49557	-0.191877	0.754065	NaN	NaN
ADPSBQ	ENSG00000135047.10	9_90020621_T_C_b37	9_90349202_G_C_b37	Independent	5.62034	NaN	NaN	-0.16484	-0.263764	-0.0659168	-0.396758	-0.615038	-0.178478	-0.561598	NaN	NaN
ADPSBQ	ENSG00000196730.8	9_90159331_A_C_b37	9_90162443_T_G_b37	Independent	5.69036	NaN	NaN	0.474079	0.312106	0.636052	0.544899	0.318607	0.771192	1.01898	NaN	NaN
ADPSBQ	ENSG00000233081.1	9_94188856_T_C_b37	9_94622536_A_G_b37	Independent	5.12576	NaN	NaN	0.473175	0.260127	0.686223	0.723064	0.33238	1.11375	1.19624	NaN	NaN
ADPSBQ	ENSG00000090054.9	9_94835310_C_T_b37	9_94914420_T_C_b37	Independent	4.54776	NaN	NaN	0.0838277	0.046445	0.12121	0.0751851	0.0337382	0.116632	0.159013	NaN	NaN
ADPSBQ	ENSG00000188312.9	9_95412510_CAGG_C_b37	9_95117419_C_T_b37	Independent	3.81918	NaN	NaN	0.544835	0.450865	0.638806	-0.315888	-0.43798	-0.193795	0.228947	NaN	NaN
ADPSBQ	ENSG00000227603.1	9_96346353_T_G_b37	9_96265600_C_T_b37	Independent	5.20923	NaN	NaN	0.79395	0.599292	0.988609	0.412084	0.238152	0.586016	1.20603	NaN	NaN
ADPSBQ	ENSG00000232063.1	9_97052077_A_T_b37	9_97150423_A_AG_b37	Independent	4.71856	NaN	NaN	-0.48588	-0.700973	-0.270787	-0.326609	-0.538672	-0.114545	-0.812489	NaN	NaN
ADPSBQ	ENSG00000148110.11	9_97222888_G_GT_b37	9_97110022_A_G_b37	Independent	5.63479	NaN	NaN	-0.283941	-0.335946	-0.231935	0.14691	0.0920503	0.20177	-0.13703	NaN	NaN
ADPSBQ	ENSG00000197816.9	9_99918645_C_T_b37	9_100000731_A_G_b37	Independent	4.57291	NaN	NaN	0.968787	0.743176	1.1944	0.14679	0.0581651	0.235415	1.11558	NaN	NaN
ADPSBQ				Independent	NaN	NaN	NaN	NaN	NaN	NaN	NaN	NaN	NaN	NaN	NaN	NaN
ADPSBQ				Independent	NaN	NaN	NaN	NaN	NaN	NaN	NaN	NaN	NaN	NaN	NaN	NaN
ADPVSC	ENSG00000177000.6	1_11854671_C_A_b37	1_11839435_T_C_b37	Independent	5.21494	NaN	NaN	2.18369	1.59249	2.77489	0.305738	0.180708	0.430767	2.48943	NaN	NaN
ADPVSC	ENSG00000116874.7	1_119555146_G_T_b37	1_119686656_A_G_b37	Independent	5.18335	NaN	NaN	-0.314043	-0.410857	-0.217229	-0.253909	-0.373087	-0.134732	-0.567953	NaN	NaN
ADPVSC	ENSG00000235098.4	1_1214805_C_T_b37	1_1354594_A_G_b37	Independent	5.02727	NaN	NaN	-2.29349	-2.6782	-1.90877	-0.602278	-1.0208	-0.183753	-2.89576	NaN	NaN
ADPVSC	ENSG00000231360.2	1_144924363_A_G_b37	1_145093015_A_G_b37	Independent	3.34471	NaN	NaN	3.28723	2.86066	3.71381	1.35993	-0.174947	2.8948	4.64716	NaN	NaN
ADPVSC	ENSG00000237188.3	1_146836506_TGA_T_b37	1_147153161_T_C_b37	Independent	5.02766	NaN	NaN	-0.302747	-0.442714	-0.16278	1.13189	0.596542	1.66724	0.829146	NaN	NaN
ADPVSC	ENSG00000237975.2	1_152161735_C_T_b37	1_152165878_C_T_b37	Independent	-10.5694	-26.4119	3.29926	-1.52522	-1.70965	-1.34079	0.407142	0.199778	0.614506	-1.11808	NaN	NaN
ADPVSC	ENSG00000143631.10	1_152193286_G_T_b37	1_151445752_C_T_b37	Independent	3.37597	NaN	NaN	-0.867529	-1.07814	-0.656918	0.490674	0.237906	0.743441	-0.376855	NaN	NaN
ADPVSC	ENSG00000197915.5	1_152310086_T_C_b37	1_152192825_C_T_b37	Independent	5.18739	NaN	NaN	1.63554	1.29063	1.98045	-1.06742	-1.4376	-0.69723	0.568121	NaN	NaN
ADPVSC	ENSG00000189339.7	1_1611432_A_G_b37	1_1590291_C_G_b37	Independent	-1.58462	-26.1419	4.77313	-0.873642	-1.04288	-0.704402	-0.139509	-0.262732	-0.0162853	-1.01315	NaN	NaN
ADPVSC	ENSG00000235477.2	1_161330332_TGA_T_b37	1_161355780_A_T_b37	Independent	5.1116	NaN	NaN	-0.48638	-0.695724	-0.277035	-0.430523	-0.639852	-0.221195	-0.916903	NaN	NaN
ADPVSC	ENSG00000238142.1	1_16811071_T_C_b37	1_17323316_G_C_b37	Independent	5.09375	NaN	NaN	-0.765002	-1.05661	-0.473391	-1.53353	-2.24846	-0.818593	-2.29853	NaN	NaN
ADPVSC	ENSG00000242193.5	1_178001395_G_A_b37	1_178000521_C_T_b37	Independent	5.21494	NaN	NaN	0.35805	0.222357	0.493743	-0.321791	-0.493334	-0.150248	0.0362593	NaN	NaN
ADPVSC	ENSG00000179023.7	1_18543252_T_A_b37	1_18808069_A_G_b37	Independent	4.40928	NaN	NaN	3.32296	2.82007	3.82584	-1.05821	-1.75354	-0.362882	2.26475	NaN	NaN
ADPVSC	ENSG00000117280.8	1_205808873_A_G_b37	1_205744546_C_A_b37	Independent	5.05149	NaN	NaN	0.361516	0.255312	0.467719	-0.28462	-0.68701	0.117769	0.0768953	NaN	NaN
ADPVSC	ENSG00000123843.8	1_208139399_T_C_b37	1_207263829_A_G_b37	Independent	5.1761	NaN	NaN	1.21743	0.784796	1.65006	-2.33609	-3.10019	-1.572	-1.11867	NaN	NaN
ADPVSC	ENSG00000203705.6	1_212955231_A_C_b37	1_212965284_C_G_b37	Independent	3.39869	NaN	NaN	-0.426715	-0.532503	-0.320928	-0.15464	-0.234124	-0.0751552	-0.581355	NaN	NaN
ADPVSC	ENSG00000142794.14	1_21759128_G_A_b37	1_21766605_TGCAGGC_T_b37	Independent	4.89594	NaN	NaN	-1.08112	-1.26027	-0.901982	-0.649658	-0.82964	-0.469675	-1.73078	NaN	NaN
ADPVSC	ENSG00000227001.2	1_21813152_T_G_b37	1_21796755_A_G_b37	Independent	5.18178	NaN	NaN	1.37937	0.892239	1.86651	0.725717	0.327881	1.12355	2.10509	NaN	NaN
ADPVSC	ENSG00000143498.13	1_222988251_T_C_b37	1_222730431_CT_C_b37	Independent	4.49772	NaN	NaN	-0.231857	-0.507327	0.0436135	-0.228097	-0.407153	-0.0490404	-0.459954	NaN	NaN
ADPVSC	ENSG00000203666.8	1_245133662_G_C_b37	1_245146108_C_T_b37	Independent	5.12397	NaN	NaN	-0.39237	-0.513802	-0.270937	0.37445	0.200237	0.548663	-0.0179193	NaN	NaN
ADPVSC	ENSG00000227135.1	1_247650919_C_T_b37	1_247655275_T_C_b37	Independent	4.59212	NaN	NaN	1.50548	1.02264	1.98832	-2.16661	-3.10164	-1.23158	-0.661127	NaN	NaN
ADPVSC	ENSG00000204084.8	1_38258644_G_C_b37	1_38268836_T_C_b37	Independent	5.20401	NaN	NaN	-0.242299	-0.334661	-0.149937	0.204882	0.120485	0.289278	-0.0374173	NaN	NaN
ADPVSC	ENSG00000043514.11	1_40303627_C_T_b37	1_40361783_G_C_b37	Independent	3.19804	NaN	NaN	-0.860795	-1.09147	-0.63012	0.353057	0.227653	0.478461	-0.507738	NaN	NaN
ADPVSC	ENSG00000272091.1	1_54505096_T_A_b37	1_54519107_G_A_b37	Independent	5.20949	NaN	NaN	1.84489	1.56346	2.12631	-2.34604	-2.73131	-1.96076	-0.50115	NaN	NaN
ADPVSC	ENSG00000116205.6	1_54805764_G_C_b37	1_53757935_G_A_b37	Independent	4.30193	NaN	NaN	0.473702	0.21987	0.727534	0.150136	0.0222397	0.278032	0.623838	NaN	NaN
ADPVSC	ENSG00000240563.1	1_62643822_C_T_b37	1_62661505_G_A_b37	Independent	5.15329	NaN	NaN	2.50152	2.13623	2.86681	-3.93349	-6.72009	-1.14689	-1.43197	NaN	NaN
ADPVSC	ENSG00000197568.9	1_70842317_C_T_b37	1_70939844_G_A_b37	Independent	-0.906701	-18.4389	5.17615	1.29292	0.944431	1.64141	-0.45259	-0.62519	-0.279989	0.840329	NaN	NaN
ADPVSC	ENSG00000116791.9	1_75167477_T_C_b37	1_75208034_C_G_b37	Independent	0.637581	NaN	NaN	-0.737102	-0.857202	-0.617002	-1.21117	-1.68214	-0.740188	-1.94827	NaN	NaN
ADPVSC	ENSG00000057468.6	1_76327933_G_A_b37	1_76251746_T_C_b37	Independent	5.17048	NaN	NaN	1.08217	0.687939	1.4764	2.47136	1.77194	3.17078	3.55353	NaN	NaN
ADPVSC	ENSG00000116288.8	1_8056669_G_A_b37	1_7332772_A_G_b37	Independent	3.50195	NaN	NaN	0.104722	0.0533496	0.156094	-0.100519	-0.208784	0.0077456	0.00420266	NaN	NaN
ADPVSC	ENSG00000142599.13	1_8504421_C_A_b37	1_8803216_A_C_b37	Independent	2.84749	NaN	NaN	0.344823	0.252624	0.437022	0.168762	0.0602337	0.277291	0.513585	NaN	NaN
ADPVSC	ENSG00000162669.11	1_91869990_G_A_b37	1_91821503_A_G_b37	Independent	5.11199	NaN	NaN	1.15393	0.716409	1.59145	-0.788382	-1.05812	-0.51864	0.365545	NaN	NaN
ADPVSC	ENSG00000097046.8	1_91998437_T_TA_b37	1_91174787_GGAAAGGAA_G_b37	Independent	-1.0607	-19.0044	4.99844	-0.49252	-0.685977	-0.299062	0.376776	0.19482	0.558732	-0.115744	NaN	NaN
ADPVSC	ENSG00000223745.3	1_93830480_G_C_b37	1_93544629_T_C_b37	Independent	2.05114	NaN	NaN	0.985985	0.71069	1.26128	0.37274	0.179705	0.565775	1.35873	NaN	NaN
ADPVSC	ENSG00000230439.2	1_94233399_GTTTAA_G_b37	1_94243151_A_AT_b37	Independent	5.12396	NaN	NaN	1.91066	1.57827	2.24306	1.40657	0.887278	1.92586	3.31723	NaN	NaN
ADPVSC	ENSG00000166275.11	10_104616500_T_C_b37	10_105428152_C_T_b37	Independent	5.01109	NaN	NaN	-0.36684	-0.461717	-0.271963	-0.209511	-0.320934	-0.0980881	-0.576351	NaN	NaN
ADPVSC	ENSG00000165806.15	10_115467068_A_G_b37	10_115439394_C_T_b37	Independent	4.15823	NaN	NaN	0.524675	0.427071	0.62228	-0.294279	-0.395547	-0.193012	0.230396	NaN	NaN
ADPVSC	ENSG00000170430.9	10_131445027_G_A_b37	10_131265852_C_T_b37	Independent	4.82539	NaN	NaN	-0.624096	-0.765412	-0.48278	0.354438	0.221128	0.487749	-0.269658	NaN	NaN
ADPVSC	ENSG00000065328.12	10_13230837_A_G_b37	10_13236194_T_C_b37	Independent	3.99423	NaN	NaN	-1.70002	-2.03954	-1.36049	-0.786656	-1.13613	-0.437185	-2.48667	NaN	NaN
ADPVSC	ENSG00000151640.8	10_134028767_G_A_b37	10_134000091_G_A_b37	Independent	5.14749	NaN	NaN	2.26149	1.83084	2.69214	-1.48217	-1.88816	-1.07617	0.779322	NaN	NaN
ADPVSC	ENSG00000120539.10	10_27481813_G_A_b37	10_27444329_T_C_b37	Independent	3.44325	NaN	NaN	0.375828	0.227284	0.524371	0.729601	0.422544	1.03666	1.10543	NaN	NaN
ADPVSC	ENSG00000182077.6	10_27669479_G_A_b37	10_27674404_T_A_b37	Independent	5.17048	NaN	NaN	1.72318	0.841776	2.60458	-3.66871	-4.38501	-2.95242	-1.94554	NaN	NaN
ADPVSC	ENSG00000224597.5	10_29744570_G_T_b37	10_29759434_C_T_b37	Independent	5.19296	NaN	NaN	0.28064	0.197557	0.363724	0.324723	0.201945	0.447501	0.605363	NaN	NaN
ADPVSC	ENSG00000237135.1	10_31301202_G_A_b37	10_31282422_A_G_b37	Independent	5.17615	NaN	NaN	2.02835	1.46133	2.59538	2.1814	1.39731	2.96549	4.20975	NaN	NaN
ADPVSC	ENSG00000107959.11	10_3190499_A_T_b37	10_3193412_C_T_b37	Independent	5.18178	NaN	NaN	-0.483867	-0.681031	-0.286702	0.361501	0.241877	0.481124	-0.122366	NaN	NaN
ADPVSC	ENSG00000233117.2	10_4284472_A_C_b37	10_4246442_A_G_b37	Independent	5.15296	NaN	NaN	0.930395	0.56587	1.29492	-0.617339	-0.885516	-0.349162	0.313056	NaN	NaN
ADPVSC	ENSG00000165406.11	10_45707936_A_G_b37	10_46100038_C_T_b37	Independent	5.1772	NaN	NaN	0.187382	0.104717	0.270048	0.222778	0.104434	0.341123	0.410161	NaN	NaN
ADPVSC	ENSG00000273363.1	10_45735449_G_A_b37	10_44481644_C_T_b37	Independent	5.20949	NaN	NaN	2.1052	1.44492	2.76548	1.52581	0.987551	2.06407	3.63101	NaN	NaN
ADPVSC	ENSG00000204169.6	10_51583018_CATT_C_b37	10_51543634_C_T_b37	Independent	-3.67721	-23.9995	5.20949	1.05268	0.782812	1.32254	1.72477	1.34158	2.10796	2.77744	NaN	NaN
ADPVSC	ENSG00000099290.11	10_51804949_G_A_b37	10_51873943_A_G_b37	Independent	-11.2593	-48.4158	5.1358	-1.02093	-1.14342	-0.898443	0.811897	0.538148	1.08565	-0.209033	NaN	NaN
ADPVSC	ENSG00000230091.2	10_81805246_T_C_b37	10_81838656_A_C_b37	Independent	5.17615	NaN	NaN	1.15149	0.884931	1.41804	0.499054	0.306942	0.691167	1.65054	NaN	NaN
ADPVSC	ENSG00000240089.2	10_88709628_G_A_b37	10_88736929_C_T_b37	Independent	5.13211	NaN	NaN	1.14805	0.879655	1.41644	-0.494904	-0.706113	-0.283696	0.653143	NaN	NaN
ADPVSC	ENSG00000148690.10	10_95518875_A_G_b37	10_95460373_T_G_b37	Independent	5.20044	NaN	NaN	0.275163	0.171078	0.379248	-0.564051	-0.857604	-0.270499	-0.288888	NaN	NaN
ADPVSC	ENSG00000095713.9	10_99685974_G_T_b37	10_99635777_T_C_b37	Independent	-3.1842	-21.7699	4.55273	1.24114	0.864237	1.61804	1.1571	0.563875	1.75032	2.39824	NaN	NaN
ADPVSC	ENSG00000165895.13	11_100361415_C_T_b37	11_100742568_A_G_b37	Independent	4.05129	NaN	NaN	-0.344958	-0.512212	-0.177705	-0.181366	-0.281671	-0.0810604	-0.526324	NaN	NaN
ADPVSC	ENSG00000197580.7	11_111287726_T_A_b37	11_112063254_C_T_b37	Independent	5.18707	NaN	NaN	-0.867566	-1.11781	-0.617321	-1.88657	-3.02472	-0.748424	-2.75414	NaN	NaN
ADPVSC	ENSG00000149292.12	11_113160199_C_T_b37	11_113209428_C_G_b37	Independent	4.52789	NaN	NaN	-0.387156	-0.531147	-0.243164	-0.438079	-0.57584	-0.300319	-0.825235	NaN	NaN
ADPVSC	ENSG00000109854.9	11_20385228_T_C_b37	11_20379963_C_G_b37	Independent	5.18178	NaN	NaN	0.668226	0.574402	0.76205	-0.428799	-0.585004	-0.272594	0.239427	NaN	NaN
ADPVSC	ENSG00000142102.11	11_295670_G_A_b37	11_297279_G_A_b37	Independent	5.02388	NaN	NaN	0.891675	0.702999	1.08035	-0.269964	-0.389898	-0.15003	0.621711	NaN	NaN
ADPVSC	ENSG00000149089.8	11_34868267_T_C_b37	11_34951945_A_G_b37	Independent	5.20949	NaN	NaN	-0.761174	-0.916136	-0.606211	0.420285	0.337141	0.50343	-0.340888	NaN	NaN
ADPVSC	ENSG00000149084.7	11_43877934_C_A_b37	11_43846697_T_C_b37	Independent	5.21494	NaN	NaN	-1.05415	-1.17471	-0.93358	-0.44189	-0.617047	-0.266733	-1.49604	NaN	NaN
ADPVSC	ENSG00000254427.1	11_45377933_A_AT_b37	11_45394284_T_G_b37	Independent	2.80293	NaN	NaN	1.81811	1.42944	2.20678	0.949187	0.513472	1.3849	2.7673	NaN	NaN
ADPVSC	ENSG00000134809.4	11_58074212_G_A_b37	11_57283988_C_T_b37	Independent	5.0626	NaN	NaN	-0.567105	-0.664119	-0.470091	0.57739	0.293177	0.861603	0.0102844	NaN	NaN
ADPVSC	ENSG00000175334.3	11_65728674_G_GA_b37	11_65730942_G_GT_b37	Independent	4.39163	NaN	NaN	0.24566	0.083229	0.408092	-0.171307	-0.268516	-0.0740975	0.0743536	NaN	NaN
ADPVSC	ENSG00000259799.1	11_68923241_G_A_b37	11_68855233_G_A_b37	Independent	4.95715	NaN	NaN	-1.49016	-1.81028	-1.17005	-0.992571	-1.30377	-0.681374	-2.48274	NaN	NaN
ADPVSC	ENSG00000149054.10	11_6941739_T_C_b37	11_6951015_C_G_b37	Independent	4.58593	NaN	NaN	1.50004	1.27949	1.72059	-0.702447	-0.924778	-0.480116	0.797591	NaN	NaN
ADPVSC	ENSG00000177042.10	11_696036_C_T_b37	11_695854_C_T_b37	Independent	5.07517	NaN	NaN	0.900636	0.762821	1.03845	0.548856	0.421269	0.676443	1.44949	NaN	NaN
ADPVSC	ENSG00000241170.2	11_74678201_T_TAG_b37	11_74624011_C_A_b37	Independent	5.14197	NaN	NaN	0.979753	0.76364	1.19587	-0.676895	-0.948225	-0.405565	0.302858	NaN	NaN
ADPVSC	ENSG00000137474.15	11_76881718_C_T_b37	11_77453716_C_T_b37	Independent	-0.219744	-15.9066	5.15329	0.621313	0.325562	0.917064	-0.892755	-1.19857	-0.586945	-0.271442	NaN	NaN
ADPVSC	ENSG00000246067.3	11_82784316_C_T_b37	11_82783814_C_T_b37	Independent	5.20949	NaN	NaN	-0.511791	-0.666304	-0.357277	-0.468758	-0.670233	-0.267283	-0.980548	NaN	NaN
ADPVSC	ENSG00000166436.11	11_8693405_G_A_b37	11_8714275_T_C_b37	Independent	1.05703	NaN	NaN	0.592291	0.46534	0.719241	-0.282362	-0.399108	-0.165616	0.309929	NaN	NaN
ADPVSC	ENSG00000136048.9	12_102091068_T_G_b37	12_102245002_T_C_b37	Independent	4.97324	NaN	NaN	0.257907	0.146949	0.368864	0.19394	0.0257977	0.362082	0.451847	NaN	NaN
ADPVSC	ENSG00000136011.10	12_104002896_T_C_b37	12_103663275_T_G_b37	Independent	4.89917	NaN	NaN	1.44705	0.813525	2.08057	-6.64385	-48.0092	34.7215	-5.1968	NaN	NaN
ADPVSC	ENSG00000229186.3	12_112322778_G_A_b37	12_112079745_TTG_T_b37	Independent	4.96668	NaN	NaN	-1.29967	-1.73881	-0.860535	0.275808	0.0334595	0.518157	-1.02387	NaN	NaN
ADPVSC	ENSG00000158104.7	12_121376416_C_T_b37	12_122304130_T_C_b37	Independent	3.56268	NaN	NaN	0.745183	0.456634	1.03373	-0.651759	-0.965483	-0.338035	0.0934239	NaN	NaN
ADPVSC	ENSG00000256092.2	12_123849863_T_C_b37	12_123759555_G_T_b37	Independent	5.07948	NaN	NaN	1.15375	0.79907	1.50843	-0.839076	-1.32675	-0.351398	0.314674	NaN	NaN
ADPVSC	ENSG00000168778.7	12_124113460_A_G_b37	12_124196891_C_G_b37	Independent	5.15906	NaN	NaN	-0.746636	-1.06928	-0.423989	0.297693	0.187246	0.408141	-0.448943	NaN	NaN
ADPVSC	ENSG00000119242.4	12_124462254_T_A_b37	12_124509177_G_A_b37	Independent	2.24208	NaN	NaN	0.260007	0.166167	0.353847	-0.234741	-0.322895	-0.146586	0.025266	NaN	NaN
ADPVSC	ENSG00000183935.3	12_13154123_G_C_b37	12_13111864_A_G_b37	Independent	4.00244	NaN	NaN	0.638368	0.474189	0.802547	0.423676	0.248836	0.598517	1.06204	NaN	NaN
ADPVSC	ENSG00000256967.1	12_7131733_A_T_b37	12_7262024_C_T_b37	Independent	3.0392	NaN	NaN	0.654338	0.492422	0.816254	-0.720771	-1.04577	-0.39577	-0.0664334	NaN	NaN
ADPVSC	ENSG00000258100.1	12_91669932_C_T_b37	12_91742384_G_GT_b37	Independent	5.08141	NaN	NaN	1.51694	0.84328	2.1906	-0.933552	-1.51213	-0.35497	0.583389	NaN	NaN
ADPVSC	ENSG00000111788.9	12_9463774_G_T_b37	12_9436083_C_T_b37	Independent	-3.92156	-23.4196	4.93238	-0.728724	-0.983715	-0.473734	-0.51647	-0.775421	-0.257519	-1.24519	NaN	NaN
ADPVSC	ENSG00000134905.12	13_111301543_C_G_b37	13_111390429_A_G_b37	Independent	4.92959	NaN	NaN	-0.459725	-0.580708	-0.338742	0.245762	0.158612	0.332912	-0.213963	NaN	NaN
ADPVSC	ENSG00000169062.10	13_115062235_A_G_b37	13_115005979_C_G_b37	Independent	4.78084	NaN	NaN	-0.478115	-0.61841	-0.33782	0.214082	0.13474	0.293425	-0.264033	NaN	NaN
ADPVSC	ENSG00000120675.4	13_43555687_A_G_b37	13_43597706_C_T_b37	Independent	5.15906	NaN	NaN	-1.61283	-1.78891	-1.43675	-0.22912	-0.34416	-0.114081	-1.84195	NaN	NaN
ADPVSC	ENSG00000151773.8	13_44397815_T_C_b37	13_44460470_T_C_b37	Independent	5.19296	NaN	NaN	1.5865	1.30818	1.86483	-0.890365	-1.18837	-0.592362	0.696139	NaN	NaN
ADPVSC	ENSG00000136104.14	13_51453816_A_G_b37	13_51484003_G_C_b37	Independent	5.14167	NaN	NaN	-1.7815	-2.27226	-1.29075	0.204317	0.0946962	0.313938	-1.57719	NaN	NaN
ADPVSC	ENSG00000136098.12	13_53542893_G_A_b37	13_52801636_TA_T_b37	Independent	4.22641	NaN	NaN	0.387931	0.288224	0.487639	0.369986	0.191926	0.548047	0.757918	NaN	NaN
ADPVSC	ENSG00000247400.3	13_96070618_G_GAT_b37	13_96480271_C_T_b37	Independent	4.60207	NaN	NaN	0.498393	0.309412	0.687375	-0.891556	-1.23625	-0.546866	-0.393163	NaN	NaN
ADPVSC	ENSG00000183484.7	14_105315023_T_C_b37	14_105520675_C_T_b37	Independent	4.73176	NaN	NaN	-0.54702	-0.782705	-0.311335	0.748959	0.388757	1.10916	0.201939	NaN	NaN
ADPVSC	ENSG00000100461.13	14_23369990_T_TTA_b37	14_23451345_G_A_b37	Independent	5.19296	NaN	NaN	-0.551314	-0.808633	-0.293995	-0.175903	-0.256995	-0.0948103	-0.727217	NaN	NaN
ADPVSC	ENSG00000157379.9	14_24758529_C_A_b37	14_24758641_G_A_b37	Independent	5.20949	NaN	NaN	-0.939216	-1.15994	-0.718494	0.462107	0.346267	0.577948	-0.477108	NaN	NaN
ADPVSC	ENSG00000092020.6	14_35588973_AG_A_b37	14_35594442_G_A_b37	Independent	5.21494	NaN	NaN	-0.592741	-0.804173	-0.381309	-0.151263	-0.228105	-0.0744203	-0.744004	NaN	NaN
ADPVSC	ENSG00000259070.1	14_39346250_C_A_b37	14_39400748_TTAAA_T_b37	Independent	4.98985	NaN	NaN	-1.94188	-2.45083	-1.43293	1.02745	0.615069	1.43983	-0.914432	NaN	NaN
ADPVSC	ENSG00000126790.7	14_60018775_AC_A_b37	14_59980614_C_T_b37	Independent	5.1985	NaN	NaN	0.357067	0.238817	0.475316	-1.07259	-1.4929	-0.652284	-0.715527	NaN	NaN
ADPVSC	ENSG00000139998.10	14_65441561_A_G_b37	14_66437563_A_G_b37	Independent	0.465487	NaN	NaN	0.467999	0.301884	0.634113	0.377556	0.212436	0.542676	0.845554	NaN	NaN
ADPVSC	ENSG00000119599.12	14_73361447_G_T_b37	14_74296651_T_C_b37	Independent	5.162	NaN	NaN	0.50127	0.36963	0.632909	-0.226767	-0.329561	-0.123973	0.274503	NaN	NaN
ADPVSC	ENSG00000259065.1	14_74269158_C_A_b37	14_74255556_C_T_b37	Independent	3.74979	NaN	NaN	2.24711	2.04142	2.4528	0.767212	0.56687	0.967555	3.01432	NaN	NaN
ADPVSC	ENSG00000140043.7	14_74318714_A_G_b37	14_74380990_G_C_b37	Independent	5.14166	NaN	NaN	0.611734	0.50866	0.714807	-0.66485	-0.830224	-0.499477	-0.0531165	NaN	NaN
ADPVSC	ENSG00000258819.1	14_77640023_C_CA_b37	14_77049416_G_A_b37	Independent	4.81218	NaN	NaN	-2.68612	-6.77754	1.4053	-0.993574	-1.77272	-0.214425	-3.67969	NaN	NaN
ADPVSC	ENSG00000165934.8	14_92167947_T_C_b37	14_92581754_CAG_C_b37	Independent	4.05586	NaN	NaN	-0.266385	-0.331467	-0.201303	0.208301	-0.000292605	0.416895	-0.0580836	NaN	NaN
ADPVSC	ENSG00000259363.1	15_100423436_G_A_b37	15_100361461_A_G_b37	Independent	-58.0689	-137.04	4.63811	-1.20606	-1.59451	-0.817603	-0.990017	-1.32156	-0.658471	-2.19607	NaN	NaN
ADPVSC	ENSG00000259430.1	15_100983419_T_C_b37	15_100793732_A_G_b37	Independent	3.76746	NaN	NaN	0.797749	-0.450586	2.04608	1.4097	0.351625	2.46777	2.20745	NaN	NaN
ADPVSC	ENSG00000166664.9	15_31497325_C_T_b37	15_30973076_A_G_b37	Independent	5.02388	NaN	NaN	1.30898	0.746053	1.8719	-2.8085	-4.34531	-1.2717	-1.49953	NaN	NaN
ADPVSC	ENSG00000206127.6	15_32925861_G_A_b37	15_32947334_C_T_b37	Independent	2.37934	NaN	NaN	1.32911	1.01489	1.64334	2.20245	1.59851	2.80639	3.53156	NaN	NaN
ADPVSC	ENSG00000140323.4	15_40721128_C_G_b37	15_40650784_GC_G_b37	Independent	5.20401	NaN	NaN	3.10901	2.77216	3.44586	2.05303	1.71612	2.38994	5.16204	NaN	NaN
ADPVSC	ENSG00000128891.11	15_40883541_AAG_A_b37	15_40850020_AAGAATT_A_b37	Independent	4.63786	NaN	NaN	-0.501519	-0.620529	-0.382508	-0.292993	-0.404657	-0.181329	-0.794511	NaN	NaN
ADPVSC	ENSG00000166762.12	15_44021501_G_C_b37	15_44082088_C_A_b37	Independent	5.21494	NaN	NaN	-5.26316	-6.10777	-4.41855	4.95711	4.01931	5.89491	-0.306053	NaN	NaN
ADPVSC	ENSG00000069869.11	15_56277401_T_C_b37	15_56291527_C_A_b37	Independent	5.20401	NaN	NaN	0.334198	0.23036	0.438035	0.249385	0.080235	0.418535	0.583582	NaN	NaN
ADPVSC	ENSG00000260776.1	15_78248191_A_G_b37	15_78235104_T_G_b37	Independent	4.95269	NaN	NaN	1.78561	1.30169	2.26952	1.76834	1.26408	2.27261	3.55395	NaN	NaN
ADPVSC	ENSG00000259328.1	15_83368719_G_A_b37	15_82500975_T_G_b37	Independent	5.17048	NaN	NaN	-6.64386	-49.212	35.9243	-0.942238	-1.30168	-0.582801	-7.58609	NaN	NaN
ADPVSC	ENSG00000255769.3	15_83378248_G_C_b37	15_83721484_A_C_b37	Independent	5.12396	NaN	NaN	-6.64385	-45.3993	32.1116	-1.33163	-1.98995	-0.673318	-7.97549	NaN	NaN
ADPVSC	ENSG00000230373.4	15_84832483_T_A_b37	15_85112461_C_A_b37	Independent	5.03044	NaN	NaN	-0.788148	-0.941966	-0.63433	0.675221	0.428187	0.922255	-0.112927	NaN	NaN
ADPVSC	ENSG00000184206.7	15_84944192_C_G_b37	15_85060599_T_A_b37	Independent	4.70227	NaN	NaN	0.809419	0.559855	1.05898	0.605307	0.408212	0.802402	1.41473	NaN	NaN
ADPVSC	ENSG00000254852.4	16_15139825_T_TTTGC_b37	16_15196567_T_G_b37	Independent	0.512262	NaN	NaN	1.4862	0.803181	2.16922	0.622148	-0.0929014	1.3372	2.10835	NaN	NaN
ADPVSC	ENSG00000183426.11	16_15153717_T_C_b37	16_15145252_C_T_b37	Independent	5.20401	NaN	NaN	-0.616334	-0.74689	-0.485778	0.341058	0.231441	0.450676	-0.275275	NaN	NaN
ADPVSC	ENSG00000250251.2	16_15521341_AAAG_A_b37	16_15261657_T_C_b37	Independent	4.44041	NaN	NaN	-0.269445	-0.451002	-0.0878873	-0.347944	-0.6047	-0.0911891	-0.617389	NaN	NaN
ADPVSC	ENSG00000260973.1	16_22033127_A_T_b37	16_22098662_T_C_b37	Independent	5.0814	NaN	NaN	3.67074	2.83078	4.5107	2.46847	1.79398	3.14295	6.13921	NaN	NaN
ADPVSC	ENSG00000261613.2	16_2713728_C_T_b37	16_2700201_G_A_b37	Independent	-1.58086	-41.9839	5.03695	4.71117	4.26413	5.15821	3.05163	2.42556	3.67769	7.7628	NaN	NaN
ADPVSC	ENSG00000197165.6	16_28602991_A_G_b37	16_28508447_A_G_b37	Independent	-6.43403	-29.1346	2.33054	1.19206	0.972177	1.41194	-0.847353	-1.17754	-0.517169	0.344707	NaN	NaN
ADPVSC	ENSG00000242612.2	16_449178_T_G_b37	16_468964_G_A_b37	Independent	-1.28909	-15.2934	5.03832	0.288521	0.180098	0.396944	0.484104	0.310397	0.657811	0.772625	NaN	NaN
ADPVSC	ENSG00000159708.13	16_67446371_C_CTG_b37	16_67361234_T_C_b37	Independent	5.20401	NaN	NaN	0.873839	NaN	NaN	0.873839	NaN	NaN	1.74768	NaN	NaN
ADPVSC	ENSG00000132600.12	16_68381978_A_G_b37	16_68387341_C_T_b37	Independent	5.19296	NaN	NaN	-0.230653	-0.308231	-0.153075	0.461592	0.354719	0.568465	0.230939	NaN	NaN
ADPVSC	ENSG00000226232.4	16_70000273_G_A_b37	16_70104789_G_C_b37	Independent	5.0689	NaN	NaN	-0.83942	-0.950682	-0.728158	-0.613583	-1.04227	-0.184896	-1.453	NaN	NaN
ADPVSC	ENSG00000157322.12	16_70078960_G_A_b37	16_69976864_T_C_b37	Independent	4.72739	NaN	NaN	-2.22891	-2.83279	-1.62503	-0.891206	-1.40626	-0.376148	-3.12011	NaN	NaN
ADPVSC	ENSG00000103168.12	16_84208032_T_G_b37	16_84218565_T_C_b37	Independent	5.1538	NaN	NaN	-0.451171	-0.53585	-0.366492	-0.400504	-0.535465	-0.265543	-0.851675	NaN	NaN
ADPVSC	ENSG00000270020.1	16_86561481_T_G_b37	16_86566115_T_C_b37	Independent	5.21494	NaN	NaN	-1.40799	-1.77882	-1.03716	1.85533	1.28955	2.42111	0.447337	NaN	NaN
ADPVSC	ENSG00000185324.17	16_89696438_A_G_b37	16_89851574_A_G_b37	Independent	-0.186907	-20.5098	5.21494	-0.89426	-1.06699	-0.72153	-0.215123	-0.305698	-0.124548	-1.10938	NaN	NaN
ADPVSC	ENSG00000154803.8	17_16608168_T_C_b37	17_17131869_T_C_b37	Independent	5.06486	NaN	NaN	0.822985	0.721526	0.924444	0.547015	0.195058	0.898972	1.37	NaN	NaN
ADPVSC	ENSG00000262061.1	17_185918_T_C_b37	17_181479_C_A_b37	Independent	1.84268	NaN	NaN	-0.880093	-1.23975	-0.520433	1.0705	0.636825	1.50417	0.190403	NaN	NaN
ADPVSC	ENSG00000205212.3	17_20799089_C_T_b37	17_20827039_T_C_b37	Independent	4.21262	NaN	NaN	1.63521	1.10417	2.16624	-6.64386	-91.0125	77.7248	-5.00865	NaN	NaN
ADPVSC	ENSG00000264469.1	17_25605803_G_C_b37	17_25608278_A_G_b37	Independent	-2.4636	-24.0037	5.21494	0.489085	0.327488	0.650681	1.13986	0.82093	1.45878	1.62894	NaN	NaN
ADPVSC	ENSG00000167525.9	17_27062795_TTTA_T_b37	17_27037996_T_TGGGAAGGGAGGGAAGGAGTAGGGC_b37	Independent	4.33762	NaN	NaN	-0.667379	-1.03474	-0.300023	0.360472	0.149282	0.571662	-0.306907	NaN	NaN
ADPVSC	ENSG00000244045.6	17_27199481_C_CT_b37	17_26716821_C_T_b37	Independent	4.6318	NaN	NaN	0.111293	0.036095	0.18649	0.103273	0.0266768	0.179869	0.214565	NaN	NaN
ADPVSC	ENSG00000197417.7	17_3537550_G_A_b37	17_3476191_C_T_b37	Independent	4.98116	NaN	NaN	0.424395	0.297956	0.550833	-0.960634	-1.44239	-0.478876	-0.53624	NaN	NaN
ADPVSC	ENSG00000167914.6	17_38131187_C_A_b37	17_38112608_C_T_b37	Independent	4.4864	NaN	NaN	-3.07305	-3.74287	-2.40323	-1.1964	-1.75063	-0.642166	-4.26944	NaN	NaN
ADPVSC	ENSG00000214447.3	17_42948906_A_G_b37	17_42977073_T_G_b37	Independent	5.18739	NaN	NaN	1.02079	0.727089	1.3145	0.752464	0.503643	1.00129	1.77326	NaN	NaN
ADPVSC	ENSG00000161692.13	17_43054377_G_A_b37	17_42770507_G_T_b37	Independent	1.7287	NaN	NaN	-1.04051	-1.22927	-0.851741	-0.828438	-1.29844	-0.358434	-1.86894	NaN	NaN
ADPVSC	ENSG00000266918.1	17_43757161_C_T_b37	17_44173215_T_C_b37	Independent	4.97673	NaN	NaN	1.92251	1.3649	2.48011	2.36178	1.74886	2.97469	4.28428	NaN	NaN
ADPVSC	ENSG00000185829.11	17_43924337_A_C_b37	17_44121579_T_C_b37	Independent	5.1985	NaN	NaN	0.865643	0.661802	1.06948	0.843043	0.632586	1.0535	1.70869	NaN	NaN
ADPVSC	ENSG00000214401.4	17_44121579_T_C_b37	17_44153836_C_T_b37	Independent	5.19296	NaN	NaN	2.69409	2.50767	2.88052	0.842496	0.607703	1.07729	3.53659	NaN	NaN
ADPVSC	ENSG00000214425.2	17_44188755_T_C_b37	17_44267170_G_T_b37	Independent	2.86003	NaN	NaN	-6.64386	-7.83976	-5.44795	1.199	0.0307807	2.36722	-5.44485	NaN	NaN
ADPVSC	ENSG00000260075.1	17_44836302_T_C_b37	17_44794558_C_G_b37	Independent	5.118	NaN	NaN	1.0454	0.8282	1.26261	-0.401868	-0.579145	-0.224592	0.643535	NaN	NaN
ADPVSC	ENSG00000006282.15	17_48619290_G_A_b37	17_48624523_A_C_b37	Independent	5.19296	NaN	NaN	-0.866976	-0.972189	-0.761764	-0.631676	-0.850773	-0.412579	-1.49865	NaN	NaN
ADPVSC	ENSG00000167840.9	17_4872534_C_T_b37	17_5213391_C_T_b37	Independent	4.15533	NaN	NaN	1.52165	1.15941	1.8839	1.2919	0.599005	1.98479	2.81355	NaN	NaN
ADPVSC	ENSG00000267731.1	17_66105855_A_AT_b37	17_66202370_A_G_b37	Independent	4.36449	NaN	NaN	0.868147	0.577393	1.1589	-0.893842	-1.24746	-0.540221	-0.0256948	NaN	NaN
ADPVSC	ENSG00000177294.6	17_6690555_GTA_G_b37	17_6702935_G_GA_b37	Independent	-11.2183	-49.6687	2.40449	-1.68988	-2.07147	-1.30828	1.25827	0.640943	1.87559	-0.431611	NaN	NaN
ADPVSC	ENSG00000070731.5	17_74604417_A_G_b37	17_74577224_G_A_b37	Independent	1.72297	NaN	NaN	1.05281	0.816395	1.28922	-1.15469	-1.68096	-0.628425	-0.101884	NaN	NaN
ADPVSC	ENSG00000182534.9	17_74697848_C_A_b37	17_74681613_A_G_b37	Independent	-4.42351	-28.3168	5.00148	-0.67287	-0.773153	-0.572587	-0.257554	-0.338538	-0.17657	-0.930424	NaN	NaN
ADPVSC	ENSG00000167280.12	17_77071040_C_A_b37	17_77079576_A_G_b37	Independent	5.20079	NaN	NaN	-1.25474	-1.60054	-0.908942	-0.339568	-0.494589	-0.184546	-1.59431	NaN	NaN
ADPVSC	ENSG00000171298.8	17_78058176_G_T_b37	17_78107537_A_G_b37	Independent	-5.78523	-24.978	4.79122	-0.514511	-0.636929	-0.392093	-0.279608	-0.393473	-0.165742	-0.794119	NaN	NaN
ADPVSC	ENSG00000262877.3	17_79363728_C_T_b37	17_79370257_C_G_b37	Independent	4.2376	NaN	NaN	1.5064	1.18338	1.82943	-1.15282	-1.42122	-0.884427	0.353582	NaN	NaN
ADPVSC	ENSG00000263753.2	18_5237823_G_A_b37	18_5245824_G_A_b37	Independent	4.66526	NaN	NaN	0.644679	0.540132	0.749227	0.338847	0.208398	0.469297	0.983526	NaN	NaN
ADPVSC	ENSG00000197563.5	18_59804851_C_G_b37	18_59854253_T_C_b37	Independent	1.07307	NaN	NaN	-0.244676	-0.321704	-0.167649	-0.433241	-0.629994	-0.236488	-0.677918	NaN	NaN
ADPVSC	ENSG00000261126.3	18_77775201_T_TG_b37	18_77898326_A_AC_b37	Independent	4.54133	NaN	NaN	-0.912751	-1.11912	-0.706382	0.556168	0.302824	0.809512	-0.356583	NaN	NaN
ADPVSC	ENSG00000265179.2	18_966913_T_A_b37	18_1439072_GGACACAA_G_b37	Independent	5.19296	NaN	NaN	-6.25229	-9.92278	-2.58181	-6.64386	-98.8438	85.5561	-12.8961	NaN	NaN
ADPVSC	ENSG00000129347.15	19_10674558_G_A_b37	19_10667641_G_C_b37	Independent	5.09653	NaN	NaN	0.417152	0.325668	0.508635	0.197489	0.106528	0.28845	0.614641	NaN	NaN
ADPVSC	ENSG00000171291.4	19_11959564_T_C_b37	19_12741432_T_A_b37	Independent	5.15682	NaN	NaN	0.825243	0.541135	1.10935	-0.278984	-0.428845	-0.129122	0.546259	NaN	NaN
ADPVSC	ENSG00000266904.1	19_19887108_C_T_b37	19_19887578_A_C_b37	Independent	5.20949	NaN	NaN	-1.61129	-2.19185	-1.03073	0.352729	0.216256	0.489203	-1.25856	NaN	NaN
ADPVSC	ENSG00000196705.4	19_21371118_TAGTC_T_b37	19_21233406_T_G_b37	Independent	5.18179	NaN	NaN	0.611823	0.380201	0.843445	0.271963	0.15908	0.384845	0.883786	NaN	NaN
ADPVSC	ENSG00000197134.7	19_22246352_T_C_b37	19_22286450_G_C_b37	Independent	5.18739	NaN	NaN	-0.840638	-1.076	-0.605276	0.585045	0.367468	0.802622	-0.255593	NaN	NaN
ADPVSC	ENSG00000197372.5	19_23870110_G_T_b37	19_22993439_G_A_b37	Independent	2.97833	NaN	NaN	0.366565	0.194945	0.538186	0.277635	0.148926	0.406343	0.6442	NaN	NaN
ADPVSC	ENSG00000261824.2	19_27919336_C_A_b37	19_28342925_C_G_b37	Independent	-3.1786	-17.196	5.20949	1.60684	1.01451	2.19918	-1.26695	-1.87745	-0.65644	0.339896	NaN	NaN
ADPVSC	ENSG00000261770.1	19_28291514_C_CAG_b37	19_28336904_T_C_b37	Independent	3.7	NaN	NaN	-1.85923	-2.05331	-1.66516	0.695545	0.448851	0.942239	-1.16369	NaN	NaN
ADPVSC	ENSG00000105186.10	19_33090045_A_G_b37	19_33165870_A_C_b37	Independent	5.17615	NaN	NaN	-0.226147	-0.300597	-0.151696	0.360294	0.207979	0.51261	0.134148	NaN	NaN
ADPVSC	ENSG00000131944.5	19_33463247_G_T_b37	19_33467087_A_C_b37	Independent	0.166499	NaN	NaN	-1.10175	-1.38542	-0.818082	0.404151	0.239496	0.568806	-0.6976	NaN	NaN
ADPVSC	ENSG00000161265.10	19_36232420_C_T_b37	19_36232875_G_A_b37	Independent	5.21494	NaN	NaN	0.633497	0.54164	0.725353	-0.455458	-0.608551	-0.302365	0.178039	NaN	NaN
ADPVSC	ENSG00000180479.9	19_38987017_A_G_b37	19_37735978_A_T_b37	Independent	5.00352	NaN	NaN	0.391287	0.211419	0.571154	-0.823246	-1.24293	-0.403557	-0.431959	NaN	NaN
ADPVSC	ENSG00000176472.6	19_44037370_C_G_b37	19_43973866_G_A_b37	Independent	4.41324	NaN	NaN	1.18337	0.900101	1.46664	-0.585722	-0.860727	-0.310717	0.59765	NaN	NaN
ADPVSC	ENSG00000204920.6	19_44488352_G_A_b37	19_45041317_C_T_b37	Independent	5.21493	NaN	NaN	-1.24005	-1.63031	-0.849794	0.70312	0.381752	1.02449	-0.536934	NaN	NaN
ADPVSC	ENSG00000105464.3	19_48923101_C_A_b37	19_48510553_C_T_b37	Independent	4.17267	NaN	NaN	1.24512	0.784437	1.7058	-0.816515	-1.14042	-0.492614	0.428602	NaN	NaN
ADPVSC	ENSG00000182264.4	19_49251755_G_A_b37	19_49247963_G_T_b37	Independent	5.20949	NaN	NaN	1.49007	1.11343	1.86671	-1.03401	-1.36381	-0.704212	0.456062	NaN	NaN
ADPVSC	ENSG00000130529.11	19_49641230_A_G_b37	19_49669561_C_G_b37	Independent	5.20949	NaN	NaN	-0.911703	-1.21853	-0.604872	0.449147	0.291638	0.606656	-0.462556	NaN	NaN
ADPVSC	ENSG00000010361.9	19_50314738_A_C_b37	19_51257141_G_T_b37	Independent	4.09265	NaN	NaN	-0.542917	-0.78946	-0.296374	-0.33336	-0.498756	-0.167964	-0.876277	NaN	NaN
ADPVSC	ENSG00000105383.10	19_51761591_G_C_b37	19_51747252_T_C_b37	Independent	5.1985	NaN	NaN	0.603523	0.367263	0.839784	-1.38199	-2.27591	-0.488062	-0.778462	NaN	NaN
ADPVSC	ENSG00000182986.8	19_53400760_C_A_b37	19_53397065_G_A_b37	Independent	5.20949	NaN	NaN	-0.559782	-0.655082	-0.464483	-0.28778	-0.404561	-0.170999	-0.847563	NaN	NaN
ADPVSC	ENSG00000160336.10	19_53935160_G_A_b37	19_53940525_C_T_b37	Independent	3.03394	NaN	NaN	-0.30127	-0.428914	-0.173626	0.295678	0.135854	0.455503	-0.00559131	NaN	NaN
ADPVSC	ENSG00000241015.2	19_53935803_C_T_b37	19_53943312_A_G_b37	Independent	3.94461	NaN	NaN	-1.12103	-1.34828	-0.893769	-0.412855	-0.596229	-0.229481	-1.53388	NaN	NaN
ADPVSC	ENSG00000250731.1	19_53944261_G_A_b37	19_53945504_C_T_b37	Independent	5.1985	NaN	NaN	3.07879	2.29927	3.85831	1.9922	1.0595	2.9249	5.07099	NaN	NaN
ADPVSC	ENSG00000167608.7	19_54676433_C_T_b37	19_54672460_C_T_b37	Independent	4.71943	NaN	NaN	-1.03809	-1.3936	-0.682573	-1.80915	-2.12178	-1.49653	-2.84724	NaN	NaN
ADPVSC	ENSG00000170889.9	19_54704233_T_TA_b37	19_54705583_A_G_b37	Independent	5.18179	NaN	NaN	-0.268105	-0.334611	-0.201599	-0.184125	-0.289608	-0.0786433	-0.452231	NaN	NaN
ADPVSC	ENSG00000160439.11	19_55561469_GC_G_b37	19_55574512_G_A_b37	Independent	4.36945	NaN	NaN	-0.915395	-1.66228	-0.168507	0.106574	-0.125261	0.338408	-0.808821	NaN	NaN
ADPVSC	ENSG00000269867.1	19_58378604_GTTGA_G_b37	19_58378690_G_A_b37	Independent	5.17615	NaN	NaN	-0.934829	-1.19618	-0.673472	0.665858	0.439332	0.892384	-0.26897	NaN	NaN
ADPVSC	ENSG00000131849.10	19_58958585_T_C_b37	19_58977554_C_G_b37	Independent	3.70815	NaN	NaN	-0.570171	-0.767384	-0.372958	-0.269971	-0.392745	-0.147197	-0.840142	NaN	NaN
ADPVSC	ENSG00000065268.6	19_985207_T_C_b37	19_990645_G_A_b37	Independent	5.18739	NaN	NaN	0.578125	0.47102	0.68523	-0.397969	-0.475807	-0.32013	0.180156	NaN	NaN
ADPVSC	ENSG00000186148.7	2_111449141_A_G_b37	2_111409331_T_G_b37	Independent	5.21494	NaN	NaN	-3.3892	-4.53056	-2.24785	1.39381	0.693134	2.09449	-1.99539	NaN	NaN
ADPVSC	ENSG00000169629.7	2_113199955_G_C_b37	2_113222500_C_T_b37	Independent	5.15906	NaN	NaN	-1.72529	-2.05225	-1.39833	0.360744	0.233335	0.488152	-1.36455	NaN	NaN
ADPVSC	ENSG00000240356.2	2_114387358_G_A_b37	2_114380544_A_G_b37	Independent	4.57399	NaN	NaN	-0.661319	-0.942325	-0.380314	0.53854	0.289212	0.787867	-0.122779	NaN	NaN
ADPVSC	ENSG00000146556.10	2_114418478_G_A_b37	2_114425697_CCA_C_b37	Independent	4.52689	NaN	NaN	-0.712178	-1.13128	-0.293076	-0.272294	-0.392198	-0.152391	-0.984472	NaN	NaN
ADPVSC	ENSG00000115084.8	2_114592377_T_C_b37	2_114485997_G_A_b37	Independent	4.68478	NaN	NaN	-0.302167	-0.421359	-0.182976	-0.0863474	-0.153479	-0.0192157	-0.388515	NaN	NaN
ADPVSC	ENSG00000169967.12	2_127575744_A_T_b37	2_128178378_G_A_b37	Independent	-1.31429	-22.4279	4.97175	-0.177712	-0.246838	-0.108586	0.0950552	0.0221696	0.167941	-0.082657	NaN	NaN
ADPVSC	ENSG00000225449.2	2_130739994_A_G_b37	2_130737578_G_A_b37	Independent	4.95583	NaN	NaN	1.91299	1.40074	2.42524	3.65244	2.82917	4.4757	5.56543	NaN	NaN
ADPVSC	ENSG00000173272.9	2_132267895_A_T_b37	2_132231411_C_T_b37	Independent	5.03044	NaN	NaN	-0.943888	-1.16675	-0.721022	0.337576	0.186609	0.488543	-0.606312	NaN	NaN
ADPVSC	ENSG00000152117.13	2_132285310_C_A_b37	2_132279406_C_T_b37	Independent	5.08141	NaN	NaN	-0.525761	-0.689253	-0.362268	-0.264609	-0.372933	-0.156285	-0.790369	NaN	NaN
ADPVSC	ENSG00000071967.7	2_172377212_C_G_b37	2_172377597_T_C_b37	Independent	5.19296	NaN	NaN	0.209081	0.116493	0.301669	0.352794	0.195544	0.510044	0.561874	NaN	NaN
ADPVSC	ENSG00000178295.10	2_17982283_A_G_b37	2_17955255_G_A_b37	Independent	5.21494	NaN	NaN	0.988855	0.782686	1.19502	-0.463316	-0.62009	-0.306542	0.525539	NaN	NaN
ADPVSC	ENSG00000272211.1	2_196969324_A_T_b37	2_197122241_G_A_b37	Independent	5.20396	NaN	NaN	-6.64349	-46.3969	33.1099	-6.64347	-53.3466	40.0597	-13.287	NaN	NaN
ADPVSC	ENSG00000226124.2	2_200902672_T_C_b37	2_200624970_T_TA_b37	Independent	3.23247	NaN	NaN	-1.47679	-1.7074	-1.24619	-1.07537	-1.48556	-0.665178	-2.55216	NaN	NaN
ADPVSC	ENSG00000243478.3	2_201572564_A_T_b37	2_201560740_T_G_b37	Independent	5.01565	NaN	NaN	-3.82537	-5.72525	-1.92548	-1.78286	-2.3486	-1.21712	-5.60823	NaN	NaN
ADPVSC	ENSG00000261428.1	2_223436402_C_T_b37	2_223219087_A_G_b37	Independent	4.83004	NaN	NaN	0.932419	0.651133	1.2137	0.648977	0.410626	0.887328	1.5814	NaN	NaN
ADPVSC	ENSG00000144488.10	2_239028349_T_C_b37	2_239035737_CTG_C_b37	Independent	5.1475	NaN	NaN	1.93428	1.57583	2.29273	1.21304	0.759391	1.66669	3.14732	NaN	NaN
ADPVSC	ENSG00000168385.13	2_242732425_A_G_b37	2_242294913_A_G_b37	Independent	5.13746	NaN	NaN	0.373501	0.305263	0.441739	0.0983439	0.0266734	0.170014	0.471845	NaN	NaN
ADPVSC	ENSG00000250565.2	2_46761264_T_A_b37	2_46769135_T_C_b37	Independent	5.1985	NaN	NaN	-0.795188	-0.956664	-0.633712	0.450459	0.262282	0.638636	-0.344729	NaN	NaN
ADPVSC	ENSG00000068781.16	2_48822381_G_A_b37	2_49003458_C_T_b37	Independent	4.54243	NaN	NaN	3.81114	3.40185	4.22043	-0.829265	-1.20805	-0.450479	2.98188	NaN	NaN
ADPVSC	ENSG00000257800.1	2_74340933_TACAA_T_b37	2_74354544_A_G_b37	Independent	4.56202	NaN	NaN	1.01927	0.734132	1.30441	1.79294	1.48916	2.09672	2.81221	NaN	NaN
ADPVSC	ENSG00000236209.1	2_75185856_G_T_b37	2_75442834_C_T_b37	Independent	4.84312	NaN	NaN	3.42307	3.18035	3.66578	1.05204	0.309367	1.79472	4.47511	NaN	NaN
ADPVSC	ENSG00000270696.1	2_75932062_A_G_b37	2_76071017_G_A_b37	Independent	4.0035	NaN	NaN	0.381262	0.279118	0.483406	-0.28834	-0.419033	-0.157647	0.0929223	NaN	NaN
ADPVSC	ENSG00000183281.10	2_86747335_G_A_b37	2_87163255_C_T_b37	Independent	1.50071	NaN	NaN	1.28025	0.901447	1.65904	-1.11182	-2.02019	-0.203451	0.168427	NaN	NaN
ADPVSC	ENSG00000237510.3	2_96955480_T_C_b37	2_96434317_TA_T_b37	Independent	4.45835	NaN	NaN	-2.62353	-3.64976	-1.59729	1.23052	-0.270557	2.73159	-1.39301	NaN	NaN
ADPVSC	ENSG00000125818.13	20_1099294_T_C_b37	20_1101116_G_A_b37	Independent	5.20949	NaN	NaN	-0.200383	-0.279465	-0.1213	0.176465	0.116283	0.236647	-0.0239176	NaN	NaN
ADPVSC	ENSG00000130684.9	20_25667425_G_GGAT_b37	20_25485352_G_T_b37	Independent	4.76259	NaN	NaN	-0.273246	-0.397487	-0.149005	-0.825963	-1.21512	-0.436807	-1.09921	NaN	NaN
ADPVSC	ENSG00000269202.1	20_33780985_T_C_b37	20_33476890_C_T_b37	Independent	5.04986	NaN	NaN	0.822054	0.577	1.06711	0.69651	0.230588	1.16243	1.51856	NaN	NaN
ADPVSC	ENSG00000101425.8	20_36974512_G_C_b37	20_36932676_G_C_b37	Independent	-5.66538	-21.4816	4.75233	1.23234	0.811405	1.65327	-0.918516	-1.49304	-0.34399	0.31382	NaN	NaN
ADPVSC	ENSG00000196756.7	20_37048959_G_A_b37	20_37225023_G_T_b37	Independent	4.45716	NaN	NaN	-0.932872	-1.06876	-0.796985	0.236266	0.0877131	0.384818	-0.696607	NaN	NaN
ADPVSC	ENSG00000124191.13	20_42529403_C_G_b37	20_42473769_C_G_b37	Independent	1.30823	NaN	NaN	1.06721	0.872993	1.26144	-0.888485	-1.07533	-0.701643	0.178729	NaN	NaN
ADPVSC	ENSG00000223891.1	20_42839990_T_C_b37	20_42840019_A_G_b37	Independent	5.21494	NaN	NaN	0.414861	0.295899	0.533822	0.520109	0.323281	0.716938	0.93497	NaN	NaN
ADPVSC	ENSG00000087495.12	20_58164306_A_C_b37	20_58173606_C_T_b37	Independent	1.64217	NaN	NaN	2.04845	1.49908	2.59783	-1.18739	-1.77457	-0.600207	0.861068	NaN	NaN
ADPVSC	ENSG00000185808.9	21_38541778_G_A_b37	21_38480269_T_C_b37	Independent	5.18178	NaN	NaN	-0.523891	-0.608673	-0.439109	0.35337	0.223337	0.483402	-0.170521	NaN	NaN
ADPVSC	ENSG00000160194.13	21_44323720_C_T_b37	21_44251516_T_TTTG_b37	Independent	3.83408	NaN	NaN	-0.805576	-1.04663	-0.564525	-0.146658	-0.220616	-0.0727011	-0.952235	NaN	NaN
ADPVSC	ENSG00000184441.4	21_45759197_G_C_b37	21_45744982_C_G_b37	Independent	4.85966	NaN	NaN	0.406251	0.26585	0.546653	-0.31212	-0.514626	-0.109615	0.0941309	NaN	NaN
ADPVSC	ENSG00000160284.10	21_47587662_A_G_b37	21_47599280_C_T_b37	Independent	5.15329	NaN	NaN	-3.09812	-3.48439	-2.71185	-6.64386	-21.7164	8.42864	-9.74197	NaN	NaN
ADPVSC	ENSG00000160305.13	21_47874054_G_C_b37	21_47397828_G_A_b37	Independent	3.64908	NaN	NaN	0.224017	0.125439	0.322594	0.221269	0.116228	0.326311	0.445286	NaN	NaN
ADPVSC	ENSG00000184702.13	22_19677822_T_C_b37	22_19679303_G_A_b37	Independent	5.20401	NaN	NaN	0.518624	0.345137	0.69211	0.435725	0.258154	0.613296	0.954349	NaN	NaN
ADPVSC	ENSG00000206145.4	22_21403971_C_A_b37	22_20949578_A_G_b37	Independent	4.59065	NaN	NaN	-2.65166	-3.42505	-1.87828	1.61367	0.234697	2.99264	-1.03799	NaN	NaN
ADPVSC	ENSG00000133519.8	22_23744477_C_T_b37	22_23742105_G_A_b37	Independent	5.18739	NaN	NaN	1.45818	0.903971	2.01239	2.279	1.24606	3.31195	3.73718	NaN	NaN
ADPVSC	ENSG00000184674.8	22_24296894_A_G_b37	22_24339634_A_C_b37	Independent	4.86947	NaN	NaN	6.64386	5.44005	7.84767	-6.09495	-8.85364	-3.33627	0.548903	NaN	NaN
ADPVSC	ENSG00000128262.4	22_24766986_G_A_b37	22_24646573_C_T_b37	Independent	4.74182	NaN	NaN	-1.10821	-1.49026	-0.726171	-0.541062	-0.811048	-0.271076	-1.64928	NaN	NaN
ADPVSC	ENSG00000213707.2	22_27671537_A_T_b37	22_27671536_A_C_b37	Independent	5.17615	NaN	NaN	0.285957	NaN	NaN	0.285957	NaN	NaN	0.571913	NaN	NaN
ADPVSC	ENSG00000100296.9	22_29947666_G_A_b37	22_29924212_T_C_b37	Independent	3.6268	NaN	NaN	-0.583986	-0.665929	-0.502044	0.262717	0.182812	0.342622	-0.321269	NaN	NaN
ADPVSC	ENSG00000231576.1	22_36589511_A_C_b37	22_36708624_T_C_b37	Independent	4.43738	NaN	NaN	-1.12205	-1.46819	-0.775921	1.16062	0.65628	1.66495	0.0385622	NaN	NaN
ADPVSC	ENSG00000100336.13	22_36597877_G_A_b37	22_36597881_G_T_b37	Independent	5.21494	NaN	NaN	-6.64386	-7.97198	-5.31573	5.32413	4.00581	6.64244	-1.31973	NaN	NaN
ADPVSC	ENSG00000100216.4	22_39063015_C_A_b37	22_39172111_C_T_b37	Independent	1.17395	NaN	NaN	0.166352	0.0637673	0.268936	-0.132973	-0.19999	-0.0659568	0.0333783	NaN	NaN
ADPVSC	ENSG00000167077.8	22_42072912_C_A_b37	22_42187199_C_T_b37	Independent	3.62796	NaN	NaN	-1.78631	-2.34188	-1.23073	-1.07053	-1.6011	-0.539952	-2.85683	NaN	NaN
ADPVSC	ENSG00000100197.16	22_42617411_T_C_b37	22_42528028_C_T_b37	Independent	5.02714	NaN	NaN	-0.975726	-1.2534	-0.698057	0.877332	0.615296	1.13937	-0.0983937	NaN	NaN
ADPVSC	ENSG00000184983.5	22_42637023_G_A_b37	22_42386949_G_T_b37	Independent	4.81219	NaN	NaN	0.865567	0.693673	1.03746	-0.114548	-0.192476	-0.0366209	0.751018	NaN	NaN
ADPVSC	ENSG00000100376.7	22_45797954_G_A_b37	22_45716397_A_G_b37	Independent	3.61084	NaN	NaN	2.18902	2.07082	2.30721	-0.596632	-0.720503	-0.472761	1.59238	NaN	NaN
ADPVSC	ENSG00000144559.6	3_11864427_G_A_b37	3_11887065_C_A_b37	Independent	3.40936	NaN	NaN	-0.454754	-0.546456	-0.363051	-0.298325	-0.397673	-0.198976	-0.753078	NaN	NaN
ADPVSC	ENSG00000121542.7	3_122063137_C_G_b37	3_122993226_CA_C_b37	Independent	4.90035	NaN	NaN	-0.35785	-0.465816	-0.249884	-0.403299	-0.721152	-0.0854461	-0.761149	NaN	NaN
ADPVSC	ENSG00000206384.6	3_129883090_A_G_b37	3_129781334_T_A_b37	Independent	4.7362	NaN	NaN	1.50786	-0.458843	3.47457	1.25099	0.172737	2.32924	2.75885	NaN	NaN
ADPVSC	ENSG00000118017.3	3_137829041_G_A_b37	3_137848869_C_T_b37	Independent	5.20401	NaN	NaN	2.4966	1.96645	3.02676	1.75632	1.03513	2.47751	4.25292	NaN	NaN
ADPVSC	ENSG00000144596.7	3_14667060_G_C_b37	3_14571913_A_AT_b37	Independent	4.47403	NaN	NaN	0.628324	0.355742	0.900906	-1.11864	-1.99732	-0.239967	-0.49032	NaN	NaN
ADPVSC	ENSG00000196428.8	3_149129550_A_ACTGT_b37	3_151026925_A_ACG_b37	Independent	0.891939	NaN	NaN	0.206553	-0.0785803	0.491686	0.433029	0.207984	0.658073	0.639582	NaN	NaN
ADPVSC	ENSG00000240875.1	3_156504084_TTGG_T_b37	3_156532145_T_A_b37	Independent	5.21494	NaN	NaN	-1.19208	-1.38967	-0.994486	-2.04214	-2.86597	-1.2183	-3.23422	NaN	NaN
ADPVSC	ENSG00000196542.4	3_162063313_T_A_b37	3_161043137_C_T_b37	Independent	-0.280804	-33.5535	5.04804	1.85271	1.41219	2.29323	1.14664	0.663354	1.62992	2.99935	NaN	NaN
ADPVSC	ENSG00000224769.1	3_195335265_A_G_b37	3_195664645_T_C_b37	Independent	1.80318	NaN	NaN	1.37688	0.757183	1.99658	1.28688	0.628449	1.94531	2.66376	NaN	NaN
ADPVSC	ENSG00000176945.12	3_195708205_T_G_b37	3_195477713_G_A_b37	Independent	-5.21381	-28.2842	4.70436	-1.53805	-1.9477	-1.12841	0.768244	0.182372	1.35412	-0.769809	NaN	NaN
ADPVSC	ENSG00000145107.11	3_196552109_CG_C_b37	3_196070384_G_T_b37	Independent	2.22259	NaN	NaN	-2.01805	-4.34235	0.306245	1.30142	0.441661	2.16118	-0.716634	NaN	NaN
ADPVSC	ENSG00000119227.3	3_196675994_C_G_b37	3_196674879_A_G_b37	Independent	-2.65409	-18.5882	5.07444	0.450168	0.31643	0.583906	0.441027	0.298891	0.583163	0.891195	NaN	NaN
ADPVSC	ENSG00000235904.1	3_29322297_A_C_b37	3_29314926_C_CAT_b37	Independent	5.03044	NaN	NaN	0.832759	0.519436	1.14608	-1.18647	-1.6571	-0.715844	-0.353714	NaN	NaN
ADPVSC	ENSG00000213689.5	3_48508585_C_T_b37	3_48643648_T_C_b37	Independent	5.1677	NaN	NaN	-0.556713	-0.665443	-0.447983	0.469168	0.277825	0.660511	-0.0875447	NaN	NaN
ADPVSC	ENSG00000178252.13	3_48817596_C_A_b37	3_48888121_A_C_b37	Independent	0.293921	NaN	NaN	-0.619417	-0.763162	-0.475671	0.229077	0.0785401	0.379614	-0.39034	NaN	NaN
ADPVSC	ENSG00000187492.4	3_49490488_G_T_b37	3_49435446_A_T_b37	Independent	5.1299	NaN	NaN	1.9373	0.770085	3.10452	-6.64386	-73.2219	59.9342	-4.70656	NaN	NaN
ADPVSC	ENSG00000162244.6	3_51990930_G_C_b37	3_52027330_T_C_b37	Independent	5.02388	NaN	NaN	-0.340426	-0.412572	-0.26828	-0.329064	-0.539554	-0.118575	-0.66949	NaN	NaN
ADPVSC	ENSG00000272690.1	3_75399168_T_C_b37	3_75173340_C_G_b37	Independent	4.95583	NaN	NaN	-6.64386	-81.7167	68.429	-1.17298	-2.77256	0.426595	-7.81684	NaN	NaN
ADPVSC	ENSG00000242516.1	3_75812797_G_C_b37	3_75803471_T_C_b37	Independent	5.19296	NaN	NaN	-2.42535	-2.66079	-2.18991	2.93409	2.50188	3.36629	0.508736	NaN	NaN
ADPVSC	ENSG00000236138.4	3_75891163_G_C_b37	3_75812546_T_C_b37	Independent	5.03695	NaN	NaN	-2.24167	-2.71536	-1.76797	2.58238	1.57694	3.58782	0.340714	NaN	NaN
ADPVSC	ENSG00000246090.2	4_100077749_G_A_b37	4_100002041_C_T_b37	Independent	5.10223	NaN	NaN	-0.650638	-0.916981	-0.384294	0.883874	0.300806	1.46694	0.233236	NaN	NaN
ADPVSC	ENSG00000138658.11	4_113485372_T_C_b37	4_114323484_C_G_b37	Independent	4.62973	NaN	NaN	-0.422949	-0.586202	-0.259697	-0.332431	-0.48358	-0.181281	-0.75538	NaN	NaN
ADPVSC	ENSG00000260404.2	4_119509615_C_G_b37	4_120328520_A_G_b37	Independent	4.91651	NaN	NaN	-0.322901	-0.462116	-0.183685	0.192583	0.0209766	0.364189	-0.130318	NaN	NaN
ADPVSC	ENSG00000245958.2	4_120575866_G_T_b37	4_120381590_A_G_b37	Independent	5.03177	NaN	NaN	-0.68159	-0.78952	-0.57366	0.37815	0.220246	0.536053	-0.303441	NaN	NaN
ADPVSC	ENSG00000196810.4	4_1269367_C_T_b37	4_1040293_C_G_b37	Independent	-9.98089	-826.823	117.764	-0.389024	-0.604873	-0.173175	-0.369129	-0.607385	-0.130873	-0.758153	NaN	NaN
ADPVSC	ENSG00000179979.7	4_1341553_A_G_b37	4_1387298_A_G_b37	Independent	5.1358	NaN	NaN	1.67328	1.486	1.86057	-0.315241	-0.429407	-0.201074	1.35804	NaN	NaN
ADPVSC	ENSG00000163945.11	4_1377615_A_G_b37	4_1306886_G_C_b37	Independent	5.15329	NaN	NaN	1.55295	1.27208	1.83383	-0.455151	-0.564074	-0.346228	1.0978	NaN	NaN
ADPVSC	ENSG00000249252.1	4_15478854_T_A_b37	4_14293960_AT_A_b37	Independent	4.17744	NaN	NaN	-0.87279	-1.32753	-0.418053	-4.76359	-16.8449	7.31769	-5.63638	NaN	NaN
ADPVSC	ENSG00000248174.1	4_175041678_TGA_T_b37	4_175053754_G_GTTCT_b37	Independent	5.15329	NaN	NaN	1.37816	0.948787	1.80752	-1.25685	-1.62632	-0.887394	0.1213	NaN	NaN
ADPVSC	ENSG00000109794.9	4_187074036_T_C_b37	4_187114285_TCA_T_b37	Independent	5.04017	NaN	NaN	0.283856	0.172417	0.395296	-0.336345	-0.470779	-0.201912	-0.0524889	NaN	NaN
ADPVSC	ENSG00000164344.11	4_187173711_GCACCAATCCCAC_G_b37	4_187113041_C_G_b37	Independent	4.63544	NaN	NaN	0.920162	0.575471	1.26485	1.11201	0.72754	1.49648	2.03217	NaN	NaN
ADPVSC	ENSG00000242686.2	4_199420_C_T_b37	4_651369_T_A_b37	Independent	5.1299	NaN	NaN	-2.30105	-3.33682	-1.26527	-6.64386	-53.2696	39.9819	-8.9449	NaN	NaN
ADPVSC	ENSG00000250312.2	4_201733_G_T_b37	4_166828_A_G_b37	Independent	4.35912	NaN	NaN	0.650513	0.509071	0.791956	0.526067	0.374758	0.677376	1.17658	NaN	NaN
ADPVSC	ENSG00000163138.14	4_20733270_G_A_b37	4_20749361_G_C_b37	Independent	5.20949	NaN	NaN	-0.178609	-0.247378	-0.109841	-0.369149	-0.539565	-0.198733	-0.547759	NaN	NaN
ADPVSC	ENSG00000196355.2	4_38612708_A_T_b37	4_38652904_C_T_b37	Independent	5.20949	NaN	NaN	-1.75848	-2.21747	-1.29949	-1.09088	-1.56376	-0.618002	-2.84937	NaN	NaN
ADPVSC	ENSG00000014824.9	4_41972192_G_C_b37	4_42160018_C_CA_b37	Independent	4.70906	NaN	NaN	-0.325184	-0.494964	-0.155405	0.103497	0.0320068	0.174988	-0.221687	NaN	NaN
ADPVSC	ENSG00000124406.12	4_42657423_T_C_b37	4_42655699_A_T_b37	Independent	4.48582	NaN	NaN	-0.640897	-0.836428	-0.445367	0.477965	0.305804	0.650126	-0.162932	NaN	NaN
ADPVSC	ENSG00000163281.7	4_44708086_G_C_b37	4_44721294_C_T_b37	Independent	5.1985	NaN	NaN	0.35743	0.250148	0.464712	0.173739	0.0782777	0.2692	0.531169	NaN	NaN
ADPVSC	ENSG00000198515.9	4_47832892_T_C_b37	4_48016875_A_G_b37	Independent	4.82194	NaN	NaN	1.73761	1.40826	2.06696	-1.15614	-1.48428	-0.827991	0.581476	NaN	NaN
ADPVSC	ENSG00000128039.6	4_56525438_C_T_b37	4_56212370_G_GCGCGTCCCCGCCCCGCGC_b37	Independent	5.0689	NaN	NaN	0.776322	0.581302	0.971342	0.603856	0.404879	0.802833	1.38018	NaN	NaN
ADPVSC	ENSG00000138744.10	4_76855106_A_C_b37	4_76877402_G_A_b37	Independent	5.19296	NaN	NaN	-0.44927	-0.561127	-0.337412	-0.54451	-0.708081	-0.38094	-0.99378	NaN	NaN
ADPVSC	ENSG00000246375.2	4_89202730_C_T_b37	4_89201007_T_G_b37	Independent	5.21494	NaN	NaN	3.26907	2.72905	3.80908	1.45688	0.999525	1.91423	4.72594	NaN	NaN
ADPVSC	ENSG00000169862.14	5_11417521_C_T_b37	5_11983758_A_G_b37	Independent	5.17863	NaN	NaN	1.08942	0.689419	1.48942	-6.64386	-81.0204	67.7327	-5.55444	NaN	NaN
ADPVSC	ENSG00000145824.8	5_134892405_G_A_b37	5_134252619_C_G_b37	Independent	4.82802	NaN	NaN	0.715859	0.264946	1.16677	-1.46533	-2.08725	-0.843415	-0.749472	NaN	NaN
ADPVSC	ENSG00000197083.7	5_150291770_TAAA_T_b37	5_150324622_T_C_b37	Independent	5.18739	NaN	NaN	3.37534	3.15481	3.59586	-1.00186	-1.17876	-0.824955	2.37348	NaN	NaN
ADPVSC	ENSG00000123643.8	5_150835349_A_G_b37	5_150854881_C_T_b37	Independent	3.15193	NaN	NaN	-0.551903	-0.664565	-0.43924	0.364257	0.260315	0.468199	-0.187646	NaN	NaN
ADPVSC	ENSG00000188573.7	5_167946966_T_C_b37	5_168005812_TAAC_T_b37	Independent	5.20401	NaN	NaN	3.11016	2.75209	3.46823	1.88109	1.449	2.31318	4.99125	NaN	NaN
ADPVSC	ENSG00000183666.12	5_21443292_G_T_b37	5_21295910_G_C_b37	Independent	5.11799	NaN	NaN	1.41911	1.07376	1.76446	-0.316848	-0.465901	-0.167795	1.10226	NaN	NaN
ADPVSC	ENSG00000066230.6	5_464177_C_G_b37	5_463898_A_G_b37	Independent	5.21494	NaN	NaN	2.15524	1.84855	2.46193	-0.574892	-0.821329	-0.328456	1.58035	NaN	NaN
ADPVSC	ENSG00000225138.3	5_466458_T_C_b37	5_471478_C_T_b37	Independent	5.20401	NaN	NaN	1.15333	0.988024	1.31864	1.00125	0.851643	1.15085	2.15458	NaN	NaN
ADPVSC	ENSG00000250490.1	5_6377832_A_G_b37	5_6365689_T_C_b37	Independent	4.40212	NaN	NaN	-0.795649	-1.073	-0.518295	-0.667842	-0.94681	-0.388874	-1.46349	NaN	NaN
ADPVSC	ENSG00000254353.1	5_70679626_G_A_b37	5_70568209_G_A_b37	Independent	4.08073	NaN	NaN	-3.01433	-4.16769	-1.86097	-1.4502	-2.69743	-0.202962	-4.46453	NaN	NaN
ADPVSC	ENSG00000113318.9	5_80004285_A_AT_b37	5_79905411_C_A_b37	Independent	5.06608	NaN	NaN	0.369463	0.266687	0.472238	-0.257631	-0.348308	-0.166953	0.111832	NaN	NaN
ADPVSC	ENSG00000247572.3	5_80544322_T_C_b37	5_80589998_T_G_b37	Independent	4.89857	NaN	NaN	-1.52318	-1.80478	-1.24159	0.377709	0.25904	0.496379	-1.14547	NaN	NaN
ADPVSC	ENSG00000228716.2	5_80582130_C_G_b37	5_79959368_C_CAA_b37	Independent	1.48304	NaN	NaN	-0.936173	-1.11042	-0.761925	0.633989	0.396312	0.871666	-0.302184	NaN	NaN
ADPVSC	ENSG00000250786.1	5_9547021_C_T_b37	5_9541693_G_T_b37	Independent	4.96617	NaN	NaN	-0.491694	-0.651334	-0.332054	0.368498	0.199479	0.537517	-0.123196	NaN	NaN
ADPVSC	ENSG00000255389.1	6_111909208_T_A_b37	6_111929862_G_T_b37	Independent	-8.59524	-50.3409	4.93426	-2.12676	-2.57163	-1.68188	-0.357448	-0.522927	-0.191969	-2.48421	NaN	NaN
ADPVSC	ENSG00000025156.8	6_122781665_T_C_b37	6_122937855_G_T_b37	Independent	2.59875	NaN	NaN	0.164231	0.0837838	0.244679	-0.339955	-0.479492	-0.200417	-0.175724	NaN	NaN
ADPVSC	ENSG00000154269.10	6_131680889_C_A_b37	6_132015998_GAAAGAAAGGA_G_b37	Independent	4.79167	NaN	NaN	0.873815	0.542144	1.20549	-0.845396	-1.29977	-0.391018	0.0284191	NaN	NaN
ADPVSC	ENSG00000131015.4	6_150303473_T_A_b37	6_150276939_A_G_b37	Independent	5.20401	NaN	NaN	1.49773	0.988889	2.00657	-1.18617	-1.69338	-0.678968	0.311558	NaN	NaN
ADPVSC	ENSG00000235994.4	6_168389145_T_C_b37	6_168384977_C_T_b37	Independent	5.19296	NaN	NaN	-2.15441	-2.67597	-1.63285	2.40969	1.79231	3.02707	0.255279	NaN	NaN
ADPVSC	ENSG00000271820.1	6_170622766_A_G_b37	6_170580915_G_A_b37	Independent	5.11365	NaN	NaN	1.56838	1.16253	1.97422	-2.40369	-3.4316	-1.37577	-0.835309	NaN	NaN
ADPVSC	ENSG00000145949.8	6_2680732_C_T_b37	6_2728653_AC_A_b37	Independent	4.29206	NaN	NaN	1.0311	0.77708	1.28513	0.558181	0.326764	0.789598	1.58928	NaN	NaN
ADPVSC	ENSG00000261584.1	6_26924168_C_T_b37	6_26839716_T_G_b37	Independent	5.0626	NaN	NaN	-2.99799	-3.86087	-2.13511	0.482892	0.265886	0.699899	-2.5151	NaN	NaN
ADPVSC	ENSG00000230438.5	6_2837612_G_A_b37	6_2876535_G_A_b37	Independent	5.16432	NaN	NaN	-3.0761	-3.35527	-2.79693	1.16916	0.829862	1.50846	-1.90694	NaN	NaN
ADPVSC	ENSG00000270346.1	6_2869647_G_C_b37	6_3023384_T_A_b37	Independent	5.14412	NaN	NaN	1.56607	1.364	1.76814	-0.308171	-0.469391	-0.146951	1.2579	NaN	NaN
ADPVSC	ENSG00000235821.1	6_29698031_G_C_b37	6_29713465_T_C_b37	Independent	4.92016	NaN	NaN	-1.72231	-2.06496	-1.37965	0.903049	0.548619	1.25748	-0.819256	NaN	NaN
ADPVSC	ENSG00000230521.1	6_29840740_A_C_b37	6_29917225_G_A_b37	Not Independent	-33.141	-58.8949	-7.76939	-1.65637	-1.96469	-1.96469	-0.665175	-1.18541	-0.144942	-4.82354	-5.54306	-4.10401
ADPVSC	ENSG00000206503.7	6_29933236_T_C_b37	6_29914104_G_A_b37	Independent	5.21131	NaN	NaN	-1.17111	-1.3314	-1.01081	-0.446539	-0.562795	-0.330282	-1.61765	NaN	NaN
ADPVSC	ENSG00000237669.1	6_29973910_G_A_b37	6_29964903_T_G_b37	Independent	5.13755	NaN	NaN	-2.01725	-2.62957	-1.40494	0.641715	0.380628	0.902803	-1.37554	NaN	NaN
ADPVSC	ENSG00000124588.15	6_3016494_A_G_b37	6_3003970_A_G_b37	Independent	4.88735	NaN	NaN	-0.869267	-1.05521	-0.683328	-0.425442	-0.567044	-0.283839	-1.29471	NaN	NaN
ADPVSC	ENSG00000271361.1	6_3022940_CT_C_b37	6_3013896_A_C_b37	Independent	5.07582	NaN	NaN	1.02717	0.795248	1.2591	0.678448	0.402739	0.954157	1.70562	NaN	NaN
ADPVSC	ENSG00000261015.1	6_3032914_A_G_b37	6_3021235_G_A_b37	Independent	2.54965	NaN	NaN	-1.33909	-1.5834	-1.09479	-0.519436	-0.68878	-0.350092	-1.85853	NaN	NaN
ADPVSC	ENSG00000204531.11	6_31104100_G_C_b37	6_31152321_G_A_b37	Independent	5.11364	NaN	NaN	-4.1267	-5.45419	-2.79922	-0.820724	-1.16945	-0.471999	-4.94743	NaN	NaN
ADPVSC	ENSG00000204536.9	6_31119997_G_T_b37	6_31113940_T_C_b37	Independent	3.90113	NaN	NaN	0.491305	0.38329	0.599319	-0.286002	-0.398076	-0.173927	0.205303	NaN	NaN
ADPVSC	ENSG00000204525.10	6_31237592_A_C_b37	6_31243785_G_T_b37	Independent	0.950308	NaN	NaN	-1.68915	-1.81037	-1.56794	0.718558	0.565563	0.871553	-0.970594	NaN	NaN
ADPVSC	ENSG00000272501.1	6_31239722_A_C_b37	6_31145116_C_T_b37	Independent	-1.16229	-13.8576	4.60671	-1.02536	-1.26135	-0.78938	-0.513005	-0.735984	-0.290027	-1.53837	NaN	NaN
ADPVSC	ENSG00000272221.1	6_31355366_C_T_b37	6_31358559_C_T_b37	Independent	5.14749	NaN	NaN	-3.44895	-3.78384	-3.11406	-0.891346	-1.17825	-0.604445	-4.3403	NaN	NaN
ADPVSC	ENSG00000204516.5	6_31461711_A_G_b37	6_31454688_G_C_b37	Independent	5.19296	NaN	NaN	0.548672	0.363478	0.733866	-2.45223	-4.40506	-0.499392	-1.90356	NaN	NaN
ADPVSC	ENSG00000237541.3	6_32398853_T_TA_b37	6_32604008_A_ATTC_b37	Independent	-7.76528	-29.9767	4.61094	3.58947	3.27054	3.9084	1.09301	0.700927	1.4851	4.68248	NaN	NaN
ADPVSC	ENSG00000196126.6	6_32546743_C_T_b37	6_32639071_C_T_b37	Independent	4.06694	NaN	NaN	-2.83488	-2.98308	-2.68667	-1.06259	-1.28866	-0.83652	-3.89747	NaN	NaN
ADPVSC	ENSG00000198502.5	6_32546854_TG_T_b37	6_32569859_A_G_b37	Independent	67.322	NaN	NaN	-4.60736	-5.01636	-4.19837	-4.15298	-4.66968	-3.63629	-8.76035	NaN	NaN
ADPVSC	ENSG00000223534.1	6_32627072_G_A_b37	6_32634350_T_C_b37	Independent	5.17615	NaN	NaN	-5.39308	-5.71574	-5.07042	-1.91144	-2.36719	-1.45569	-7.30452	NaN	NaN
ADPVSC	ENSG00000241106.2	6_32796685_A_G_b37	6_32796793_G_A_b37	Independent	5.21494	NaN	NaN	1.96658	1.61068	2.32248	-1.05793	-1.3838	-0.73206	0.90865	NaN	NaN
ADPVSC	ENSG00000030110.8	6_33546837_T_C_b37	6_33945361_A_G_b37	Independent	4.00223	NaN	NaN	-0.2424	-0.322667	-0.162133	-0.201406	-0.303517	-0.0992963	-0.443807	NaN	NaN
ADPVSC	ENSG00000048544.5	6_42191176_T_C_b37	6_42182183_C_T_b37	Independent	5.18739	NaN	NaN	-0.127844	-0.191502	-0.0641853	0.345739	0.278757	0.412722	0.217895	NaN	NaN
ADPVSC	ENSG00000124587.9	6_42915021_G_A_b37	6_42903763_C_G_b37	Independent	-2.64594	-23.0332	4.36403	0.640123	0.449676	0.830569	0.429558	0.247347	0.611768	1.06968	NaN	NaN
ADPVSC	ENSG00000180113.11	6_46648129_A_G_b37	6_46649231_C_T_b37	Independent	5.1985	NaN	NaN	-0.96325	-1.19349	-0.733008	0.455994	0.226627	0.685361	-0.507256	NaN	NaN
ADPVSC	ENSG00000215190.4	6_58232122_C_T_b37	6_58194994_C_T_b37	Independent	4.01047	NaN	NaN	-0.634948	-1.02289	-0.247002	-0.532629	-0.911621	-0.153638	-1.16758	NaN	NaN
ADPVSC	ENSG00000239264.4	6_7881931_T_C_b37	6_7909967_C_T_b37	Independent	3.02527	NaN	NaN	-0.434429	-0.568244	-0.300614	0.199221	0.10866	0.289782	-0.235208	NaN	NaN
ADPVSC	ENSG00000005075.11	7_102112397_A_T_b37	7_102102343_T_C_b37	Independent	5.21494	NaN	NaN	0.369413	0.288219	0.450608	-0.356605	-0.478569	-0.234641	0.0128086	NaN	NaN
ADPVSC	ENSG00000267368.1	7_102358917_T_C_b37	7_102468220_A_G_b37	Independent	4.91147	NaN	NaN	-0.834274	-1.0822	-0.586347	-0.523448	-0.9016	-0.145296	-1.35772	NaN	NaN
ADPVSC	ENSG00000168255.14	7_102447056_T_C_b37	7_102100727_G_A_b37	Independent	3.15102	NaN	NaN	1.40291	0.916937	1.88889	-0.496424	-0.730365	-0.262482	0.90649	NaN	NaN
ADPVSC	ENSG00000165055.11	7_128100761_A_T_b37	7_128117227_G_A_b37	Independent	5.20401	NaN	NaN	0.420285	0.318251	0.52232	0.212821	0.130079	0.295562	0.633106	NaN	NaN
ADPVSC	ENSG00000271529.1	7_128215544_G_GCTA_b37	7_128329728_C_T_b37	Independent	5.00395	NaN	NaN	1.27396	1.08677	1.46116	0.5569	0.351949	0.761852	1.83086	NaN	NaN
ADPVSC	ENSG00000271553.1	7_128350815_C_T_b37	7_128356548_T_C_b37	Independent	5.20949	NaN	NaN	1.16859	0.946316	1.39087	0.705056	0.500584	0.909527	1.87365	NaN	NaN
ADPVSC	ENSG00000243317.3	7_135194201_G_T_b37	7_135356547_A_C_b37	Independent	0.886204	NaN	NaN	-0.237029	-0.329482	-0.144576	-0.138806	-0.209356	-0.0682554	-0.375835	NaN	NaN
ADPVSC	ENSG00000244701.1	7_142346294_T_C_b37	7_141362693_A_T_b37	Independent	4.15337	NaN	NaN	-0.243643	-0.389882	-0.0974042	0.349229	0.173196	0.525262	0.105585	NaN	NaN
ADPVSC	ENSG00000197362.9	7_148662706_T_C_b37	7_148847178_G_A_b37	Independent	4.87155	NaN	NaN	0.363961	0.239145	0.488778	-1.53638	-2.08405	-0.988711	-1.17242	NaN	NaN
ADPVSC	ENSG00000196584.2	7_152868079_G_A_b37	7_152367616_A_C_b37	Independent	4.19416	NaN	NaN	-1.79309	-2.69492	-0.891269	0.804623	0.529999	1.07925	-0.988469	NaN	NaN
ADPVSC	ENSG00000071189.17	7_17972951_C_G_b37	7_18697996_T_C_b37	Independent	4.38079	NaN	NaN	-0.244852	-0.31794	-0.171764	0.294583	0.157474	0.431692	0.0497315	NaN	NaN
ADPVSC	ENSG00000179428.2	7_22767433_A_G_b37	7_22796467_A_G_b37	Independent	5.76159	NaN	NaN	-2.32595	-2.69338	-1.95852	-6.64386	-56.4388	43.1511	-8.96981	NaN	NaN
ADPVSC	ENSG00000272568.1	7_28996220_G_A_b37	7_29036257_C_T_b37	Independent	4.05244	NaN	NaN	0.916178	0.512918	1.31944	0.711587	0.395732	1.02744	1.62777	NaN	NaN
ADPVSC	ENSG00000211697.2	7_38432130_A_G_b37	7_38388163_A_G_b37	Independent	-3.28797	-28.9292	5.0814	1.34089	0.786728	1.89506	-1.50896	-2.13516	-0.882766	-0.16807	NaN	NaN
ADPVSC	ENSG00000196204.7	7_5014019_C_T_b37	7_5026348_C_T_b37	Independent	5.09906	NaN	NaN	-0.461943	-0.617594	-0.306292	-0.203708	-0.305491	-0.101924	-0.665651	NaN	NaN
ADPVSC	ENSG00000146574.11	7_5940771_T_C_b37	7_6853487_AT_A_b37	Independent	4.04893	NaN	NaN	-0.35601	-0.605209	-0.106811	0.0998751	-0.131782	0.331532	-0.256135	NaN	NaN
ADPVSC	ENSG00000196247.7	7_64185150_T_C_b37	7_64126332_A_C_b37	Independent	5.1475	NaN	NaN	-0.691975	-0.835906	-0.548045	0.301576	0.158527	0.444625	-0.3904	NaN	NaN
ADPVSC	ENSG00000106392.6	7_7250753_T_C_b37	7_7227638_G_GAC_b37	Independent	5.20949	NaN	NaN	0.748548	0.571023	0.926073	0.401334	0.265758	0.536911	1.14988	NaN	NaN
ADPVSC	ENSG00000160828.13	7_74274310_T_C_b37	7_74359066_G_A_b37	Independent	4.72973	NaN	NaN	-1.41466	-2.04695	-0.782368	-0.757805	-1.18429	-0.331316	-2.17246	NaN	NaN
ADPVSC	ENSG00000127952.12	7_75622281_T_C_b37	7_75649821_G_C_b37	Independent	5.18739	NaN	NaN	1.22969	1.0105	1.44889	0.322309	0.164052	0.480565	1.552	NaN	NaN
ADPVSC	ENSG00000146707.10	7_76239703_T_A_b37	7_76211025_A_G_b37	Independent	-2.84023	-25.6667	4.86754	1.84227	1.61875	2.06579	-1.02364	-1.25385	-0.793416	0.818638	NaN	NaN
ADPVSC	ENSG00000233448.2	7_76563323_C_T_b37	7_76610299_A_G_b37	Independent	3.05633	NaN	NaN	-0.793392	-1.05227	-0.534516	0.829231	0.516761	1.1417	0.0358386	NaN	NaN
ADPVSC	ENSG00000272950.1	7_97846435_G_A_b37	7_97937981_T_A_b37	Independent	-4.02946	-31.8135	4.84989	-1.04762	-1.40793	-0.687315	-1.10372	-1.65832	-0.549129	-2.15134	NaN	NaN
ADPVSC	ENSG00000272782.1	7_97947055_G_C_b37	7_98007541_C_CAT_b37	Independent	5.18739	NaN	NaN	1.29159	1.06742	1.51576	-0.52566	-0.703652	-0.347669	0.765928	NaN	NaN
ADPVSC	ENSG00000272505.1	8_10314011_A_G_b37	8_10274130_G_A_b37	Independent	3.42296	NaN	NaN	-1.07602	-1.45403	-0.698006	-0.482182	-0.662634	-0.301731	-1.5582	NaN	NaN
ADPVSC	ENSG00000164830.13	8_107524685_CTG_C_b37	8_107599525_C_T_b37	Independent	5.07949	NaN	NaN	-0.141393	-0.211699	-0.0710873	-0.0844356	-0.155368	-0.0135035	-0.225829	NaN	NaN
ADPVSC	ENSG00000204839.4	8_144656977_G_C_b37	8_144653527_GC_G_b37	Independent	5.0876	NaN	NaN	0.944216	0.645915	1.24252	-0.862651	-1.27867	-0.446636	0.0815648	NaN	NaN
ADPVSC	ENSG00000147813.11	8_144681777_G_T_b37	8_144664818_C_T_b37	Independent	4.28707	NaN	NaN	0.694964	0.56723	0.822698	0.31496	0.196043	0.433876	1.00992	NaN	NaN
ADPVSC	ENSG00000071894.10	8_145618862_C_G_b37	8_145603114_A_C_b37	Independent	5.1985	NaN	NaN	-0.572562	-0.691166	-0.453958	-0.470834	-0.59508	-0.346587	-1.0434	NaN	NaN
ADPVSC	ENSG00000228451.3	8_26210835_A_C_b37	8_26239383_C_A_b37	Independent	5.20949	NaN	NaN	-0.844498	-1.14609	-0.542908	0.560682	0.364347	0.757016	-0.283816	NaN	NaN
ADPVSC	ENSG00000066855.11	8_66528604_G_A_b37	8_66292896_C_T_b37	Independent	4.23814	NaN	NaN	0.335659	0.232832	0.438486	-0.573854	-0.867184	-0.280523	-0.238195	NaN	NaN
ADPVSC	ENSG00000251136.4	8_90804328_C_T_b37	8_90768439_A_G_b37	Independent	5.1687	NaN	NaN	-1.07835	-1.35827	-0.798419	0.57848	0.307394	0.849566	-0.499867	NaN	NaN
ADPVSC	ENSG00000119509.8	9_103087128_T_A_b37	9_102773356_T_C_b37	Independent	4.85021	NaN	NaN	0.197982	0.121143	0.27482	0.33288	0.208633	0.457127	0.530862	NaN	NaN
ADPVSC	ENSG00000226334.1	9_107690057_C_A_b37	9_107688764_AC_A_b37	Independent	4.579	NaN	NaN	-2.05475	-2.45403	-1.65547	-0.988759	-1.33844	-0.639077	-3.0435	NaN	NaN
ADPVSC	ENSG00000148143.8	9_110375666_G_A_b37	9_109805512_A_C_b37	Independent	3.85084	NaN	NaN	0.463192	0.301389	0.624995	0.273545	0.141493	0.405597	0.736737	NaN	NaN
ADPVSC	ENSG00000226752.3	9_123509228_G_A_b37	9_123582697_G_T_b37	Independent	5.20949	NaN	NaN	-2.10407	-2.24575	-1.9624	-0.447176	-0.643114	-0.251237	-2.55125	NaN	NaN
ADPVSC	ENSG00000271875.1	9_136128546_A_G_b37	9_136132908_T_TC_b37	Independent	5.16479	NaN	NaN	1.52126	1.28716	1.75536	-0.753366	-1.03756	-0.469173	0.767893	NaN	NaN
ADPVSC	ENSG00000175164.9	9_136132908_T_TC_b37	9_136131461_G_A_b37	Independent	5.17048	NaN	NaN	0.892636	0.692305	1.09297	0.595386	0.339367	0.851405	1.48802	NaN	NaN
ADPVSC	ENSG00000225756.1	9_136603203_A_T_b37	9_136519216_G_C_b37	Independent	1.28275	NaN	NaN	0.802083	0.49991	1.10426	-0.667136	-0.994756	-0.339515	0.134947	NaN	NaN
ADPVSC	ENSG00000213221.4	9_139318080_G_A_b37	9_139260551_C_T_b37	Independent	5.21494	NaN	NaN	1.48445	1.27279	1.69611	1.00183	0.780906	1.22276	2.48628	NaN	NaN
ADPVSC	ENSG00000164978.13	9_34183752_CT_C_b37	9_34369062_C_G_b37	Independent	-9.49307	-43.8604	4.88738	1.19954	1.0889	1.31019	0.618261	0.522472	0.714049	1.8178	NaN	NaN
ADPVSC	ENSG00000137106.13	9_37422656_C_T_b37	9_37436105_G_A_b37	Independent	5.12357	NaN	NaN	0.3862	0.305761	0.466639	-0.203924	-0.296082	-0.111767	0.182276	NaN	NaN
ADPVSC	ENSG00000197646.6	9_5514839_T_C_b37	9_5501118_G_T_b37	Independent	5.17913	NaN	NaN	0.703093	0.526687	0.879499	0.601504	0.402962	0.800047	1.3046	NaN	NaN
ADPVSC	ENSG00000106733.16	9_77723157_A_T_b37	9_77707300_A_T_b37	Independent	5.06225	NaN	NaN	-0.712081	-0.821466	-0.602696	0.329255	0.169624	0.488885	-0.382826	NaN	NaN
ADPVSC	ENSG00000225706.1	9_8858303_C_G_b37	9_8858350_G_A_b37	Independent	4.97673	NaN	NaN	1.51663	1.1219	1.91137	-2.16875	-3.42512	-0.912383	-0.652116	NaN	NaN
ADPVSC	ENSG00000232063.1	9_97079546_G_A_b37	9_97125603_G_T_b37	Independent	5.14166	NaN	NaN	-1.0172	-1.31732	-0.71707	-1.50161	-2.72399	-0.279217	-2.5188	NaN	NaN
ADPVSC	ENSG00000148110.11	9_97157725_GC_G_b37	9_97807085_G_C_b37	Independent	5.03497	NaN	NaN	-0.302512	-0.38114	-0.223884	-0.13692	-0.198973	-0.074867	-0.439432	NaN	NaN
ADPVSC	ENSG00000188152.8	9_99696318_G_T_b37	9_99078886_C_T_b37	Independent	4.94164	NaN	NaN	1.86976	1.12447	2.61505	-2.22977	-4.99744	0.537899	-0.360009	NaN	NaN
ADPVSC				Independent	NaN	NaN	NaN	NaN	NaN	NaN	NaN	NaN	NaN	NaN	NaN	NaN
ADRNLG	ENSG00000162836.7	1_147131465_T_C_b37	1_147140050_A_G_b37	Independent	3.09845	NaN	NaN	0.966823	0.805778	1.12787	0.362187	0.21616	0.508214	1.32901	NaN	NaN
ADRNLG	ENSG00000197915.5	1_152161648_T_G_b37	1_152165878_C_T_b37	Independent	4.82498	NaN	NaN	1.67808	1.32252	2.03364	1.59577	1.00806	2.18348	3.27385	NaN	NaN
ADRNLG	ENSG00000237975.2	1_152162131_CGTAA_C_b37	1_152210667_AAAG_A_b37	Independent	-5.21649	-32.9299	3.79252	1.59142	1.01829	2.16455	-1.31275	-1.84941	-0.776088	0.278668	NaN	NaN
ADRNLG	ENSG00000143631.10	1_152192395_G_A_b37	1_152162131_CGTAA_C_b37	Independent	4.79579	NaN	NaN	0.818064	0.527731	1.1084	-1.41314	-2.18356	-0.642732	-0.59508	NaN	NaN
ADRNLG	ENSG00000160678.7	1_153634058_G_T_b37	1_153569436_G_T_b37	Independent	3.99601	NaN	NaN	-0.817083	-1.0627	-0.571461	-1.08733	-1.56975	-0.604916	-1.90441	NaN	NaN
ADRNLG	ENSG00000143575.10	1_154251259_A_T_b37	1_154719637_G_A_b37	Independent	3.25987	NaN	NaN	0.0825534	-0.04639	0.211497	0.327994	0.0753423	0.580646	0.410548	NaN	NaN
ADRNLG	ENSG00000132676.11	1_155592161_C_T_b37	1_155118588_C_T_b37	Independent	4.78749	NaN	NaN	-0.126998	-0.301584	0.0475882	0.292411	0.0339131	0.550909	0.165413	NaN	NaN
ADRNLG	ENSG00000215845.6	1_160794709_A_G_b37	1_160510652_C_T_b37	Independent	3.82042	NaN	NaN	-0.53779	-0.772193	-0.303387	-0.327349	-0.463887	-0.190811	-0.865139	NaN	NaN
ADRNLG	ENSG00000235241.1	1_17275895_A_T_b37	1_16824337_T_C_b37	Independent	1.51584	NaN	NaN	1.22469	0.64788	1.8015	-0.679545	-1.28257	-0.0765208	0.545147	NaN	NaN
ADRNLG	ENSG00000196482.12	1_216913261_G_A_b37	1_216910054_C_G_b37	Independent	4.82028	NaN	NaN	2.6561	2.21594	3.09625	-0.504563	-0.653942	-0.355184	2.15153	NaN	NaN
ADRNLG	ENSG00000142794.14	1_21799014_C_T_b37	1_21780651_A_G_b37	Independent	3.95214	NaN	NaN	-0.532605	-0.671129	-0.394082	-0.867841	-0.990149	-0.745534	-1.40045	NaN	NaN
ADRNLG	ENSG00000218510.3	1_22358560_C_T_b37	1_22352108_C_T_b37	Independent	4.81218	NaN	NaN	0.812248	0.696805	0.92769	-0.644224	-0.954334	-0.334113	0.168024	NaN	NaN
ADRNLG	ENSG00000135773.8	1_230897893_A_G_b37	1_230914706_C_A_b37	Independent	0.818023	NaN	NaN	-2.50482	-3.36805	-1.64159	1.36934	0.883126	1.85556	-1.13547	NaN	NaN
ADRNLG	ENSG00000162946.16	1_231939642_C_G_b37	1_231733186_T_C_b37	Independent	4.45732	NaN	NaN	-0.280001	-0.458522	-0.10148	0.494083	0.238538	0.749628	0.214082	NaN	NaN
ADRNLG	ENSG00000135778.7	1_233079612_G_C_b37	1_233089728_C_T_b37	Independent	4.79579	NaN	NaN	-0.267083	-0.404954	-0.129212	0.212075	0.1054	0.31875	-0.0550081	NaN	NaN
ADRNLG	ENSG00000187815.5	1_41029752_A_G_b37	1_40939397_G_T_b37	Independent	4.03723	NaN	NaN	-0.688295	-0.876499	-0.500091	0.755815	0.490824	1.02081	0.0675208	NaN	NaN
ADRNLG	ENSG00000162366.3	1_47482775_T_C_b37	1_47660690_A_G_b37	Independent	4.29787	NaN	NaN	1.62551	1.12517	2.12586	0.538593	0.286355	0.790832	2.16411	NaN	NaN
ADRNLG	ENSG00000272091.1	1_54505096_T_A_b37	1_54519107_G_A_b37	Independent	4.82831	NaN	NaN	-3.3674	-3.89233	-2.84247	2.28064	1.9288	2.63248	-1.08675	NaN	NaN
ADRNLG	ENSG00000116783.10	1_74611350_A_G_b37	1_74663709_G_A_b37	Independent	4.82028	NaN	NaN	2.17819	1.67947	2.67691	-0.5964	-0.814982	-0.377819	1.58179	NaN	NaN
ADRNLG	ENSG00000225880.4	1_747753_TGC_T_b37	1_1322268_G_A_b37	Independent	4.7185	NaN	NaN	-1.60697	-2.94105	-0.272893	1.17408	0.521713	1.82645	-0.432888	NaN	NaN
ADRNLG	ENSG00000165806.15	10_115489589_T_C_b37	10_115439394_C_T_b37	Independent	4.81218	NaN	NaN	0.270305	0.141442	0.399169	-0.28963	-0.436261	-0.143	-0.0193248	NaN	NaN
ADRNLG	ENSG00000151640.8	10_133988228_C_T_b37	10_134000091_G_A_b37	Independent	4.80402	NaN	NaN	-2.00982	-2.37193	-1.6477	1.16444	0.723724	1.60516	-0.845372	NaN	NaN
ADRNLG	ENSG00000179296.9	10_49292498_G_A_b37	10_49405013_T_C_b37	Independent	0.52351	NaN	NaN	1.99553	1.54575	2.44531	1.33223	0.879556	1.78491	3.32776	NaN	NaN
ADRNLG	ENSG00000230091.2	10_81804766_A_G_b37	10_81797158_C_T_b37	Independent	4.59625	NaN	NaN	1.37864	1.07751	1.67977	0.638873	0.430128	0.847617	2.01751	NaN	NaN
ADRNLG	ENSG00000152766.5	10_90593616_C_T_b37	10_90541032_C_T_b37	Independent	3.22118	NaN	NaN	-1.59804	-2.10938	-1.08671	1.36271	0.907987	1.81744	-0.235332	NaN	NaN
ADRNLG	ENSG00000228701.1	10_93442449_AG_A_b37	10_93589331_T_A_b37	Independent	4.67671	NaN	NaN	-2.1092	-2.44522	-1.77318	-1.8358	-2.90198	-0.769623	-3.945	NaN	NaN
ADRNLG	ENSG00000110318.9	11_100939983_T_G_b37	11_101867596_G_A_b37	Independent	4.74807	NaN	NaN	-0.500515	-0.674028	-0.327002	0.650789	0.362759	0.938819	0.150274	NaN	NaN
ADRNLG	ENSG00000148935.6	11_22847485_C_T_b37	11_22682639_A_G_b37	Independent	4.70348	NaN	NaN	-0.597876	-0.822913	-0.372838	0.536387	0.357568	0.715206	-0.0614885	NaN	NaN
ADRNLG	ENSG00000149089.8	11_34884001_C_A_b37	11_34966492_T_C_b37	Independent	0.0146831	NaN	NaN	-1.04253	-1.22311	-0.861957	-0.306861	-0.420957	-0.192765	-1.34939	NaN	NaN
ADRNLG	ENSG00000110455.9	11_44105868_A_G_b37	11_44096398_T_A_b37	Independent	4.82831	NaN	NaN	0.78647	0.621679	0.95126	-0.636346	-0.876056	-0.396636	0.150124	NaN	NaN
ADRNLG	ENSG00000175518.6	11_5549316_A_G_b37	11_5642001_T_C_b37	Independent	4.82504	NaN	NaN	0.777067	0.508455	1.04568	-0.692989	-0.973007	-0.412971	0.0840783	NaN	NaN
ADRNLG	ENSG00000177042.10	11_655828_TTTATTA_T_b37	11_703175_A_G_b37	Independent	4.69714	NaN	NaN	-0.451355	-0.576908	-0.325802	0.362979	0.204034	0.521924	-0.0883758	NaN	NaN
ADRNLG	ENSG00000250508.1	11_68629929_G_A_b37	11_68700701_G_C_b37	Independent	4.82831	NaN	NaN	-1.29159	-1.77291	-0.810258	-4.51221	-5.12327	-3.90115	-5.8038	NaN	NaN
ADRNLG	ENSG00000149054.10	11_6941739_T_C_b37	11_6954539_G_C_b37	Independent	3.90053	NaN	NaN	1.6924	1.43471	1.95008	-0.706614	-0.970858	-0.44237	0.985781	NaN	NaN
ADRNLG	ENSG00000137486.12	11_74975662_G_A_b37	11_75078236_G_A_b37	Independent	3.81549	NaN	NaN	0.522597	0.360361	0.684833	0.608656	0.39783	0.819482	1.13125	NaN	NaN
ADRNLG	ENSG00000166436.11	11_8699662_A_G_b37	11_8599718_A_C_b37	Independent	3.54381	NaN	NaN	0.500121	0.354889	0.645353	-0.470267	-0.682961	-0.257572	0.0298543	NaN	NaN
ADRNLG	ENSG00000246523.3	11_87405761_T_C_b37	11_86715654_G_A_b37	Independent	3.07677	NaN	NaN	-0.881404	-1.18771	-0.5751	0.602112	0.245048	0.959176	-0.279292	NaN	NaN
ADRNLG	ENSG00000254860.1	11_8986787_C_G_b37	11_9046767_A_C_b37	Independent	1.87785	NaN	NaN	1.04441	0.839886	1.24893	-0.606325	-0.814919	-0.397732	0.438085	NaN	NaN
ADRNLG	ENSG00000229186.3	12_112565472_G_T_b37	12_112338985_C_CACTT_b37	Independent	3.46118	NaN	NaN	-0.691476	-0.891823	-0.491129	0.441714	0.285452	0.597976	-0.249763	NaN	NaN
ADRNLG	ENSG00000257218.1	12_121005666_GTGT_G_b37	12_121031801_A_AT_b37	Independent	4.51086	NaN	NaN	0.181138	0.0448446	0.317431	-0.282034	-0.407945	-0.156123	-0.100896	NaN	NaN
ADRNLG	ENSG00000168778.7	12_124196614_A_G_b37	12_124170293_A_G_b37	Independent	4.76217	NaN	NaN	-1.45786	-1.81143	-1.10429	0.393694	0.223802	0.563585	-1.06417	NaN	NaN
ADRNLG	ENSG00000258181.1	12_47642732_C_T_b37	12_47504161_C_T_b37	Independent	4.32977	NaN	NaN	1.25318	0.897796	1.60856	1.47931	0.903456	2.05517	2.73249	NaN	NaN
ADRNLG	ENSG00000127337.2	12_69780907_A_G_b37	12_69783320_G_GTCTCAC_b37	Independent	4.80402	NaN	NaN	-0.481259	-0.614816	-0.347701	0.707404	0.405249	1.00956	0.226146	NaN	NaN
ADRNLG	ENSG00000111788.9	12_9455342_A_G_b37	12_9431402_C_T_b37	Independent	-16.9081	-62.4439	4.43033	-1.66953	-1.91112	-1.42795	-0.452488	-0.68638	-0.218596	-2.12202	NaN	NaN
ADRNLG	ENSG00000111144.5	12_96426272_C_T_b37	12_96434746_A_G_b37	Independent	3.32382	NaN	NaN	-0.351606	-0.457268	-0.245943	0.247392	0.139676	0.355108	-0.104214	NaN	NaN
ADRNLG	ENSG00000257878.1	12_96431320_C_G_b37	12_96412338_A_C_b37	Independent	4.25692	NaN	NaN	0.810492	0.539994	1.08099	-2.513	-3.21433	-1.81167	-1.70251	NaN	NaN
ADRNLG	ENSG00000169062.10	13_115062235_A_G_b37	13_115004524_AT_A_b37	Independent	4.28804	NaN	NaN	-0.403429	-0.623903	-0.182955	0.203859	0.0953168	0.312401	-0.19957	NaN	NaN
ADRNLG	ENSG00000229111.1	13_48663725_A_C_b37	13_48993162_C_G_b37	Independent	4.68337	NaN	NaN	2.09289	1.6832	2.50259	-1.51344	-2.21159	-0.815299	0.579448	NaN	NaN
ADRNLG	ENSG00000136104.14	13_51484445_C_T_b37	13_51540733_G_C_b37	Independent	4.80402	NaN	NaN	1.18057	0.8799	1.48123	-0.872723	-1.18121	-0.564239	0.307844	NaN	NaN
ADRNLG	ENSG00000227354.2	13_79957408_T_C_b37	13_79948006_C_T_b37	Independent	4.68213	NaN	NaN	1.54513	1.25403	1.83624	-0.523904	-0.737915	-0.309892	1.02123	NaN	NaN
ADRNLG	ENSG00000224997.1	14_103629536_A_G_b37	14_104068579_G_A_b37	Independent	3.16409	NaN	NaN	1.08986	0.795419	1.38431	-0.62121	-0.893821	-0.348598	0.468654	NaN	NaN
ADRNLG	ENSG00000228032.1	14_104713333_T_C_b37	14_104729616_G_A_b37	Independent	4.80402	NaN	NaN	2.68755	2.21364	3.16146	-1.5107	-1.99428	-1.02713	1.17685	NaN	NaN
ADRNLG	ENSG00000139899.6	14_24898780_C_G_b37	14_24901433_C_T_b37	Independent	4.81218	NaN	NaN	1.43437	1.18579	1.68296	-1.47899	-1.8569	-1.10109	-0.0446185	NaN	NaN
ADRNLG	ENSG00000258744.1	14_24920473_T_C_b37	14_24923639_A_C_b37	Independent	4.5326	NaN	NaN	2.56747	1.66645	3.46849	-1.33786	-1.85627	-0.819444	1.22961	NaN	NaN
ADRNLG	ENSG00000100504.12	14_51369010_G_A_b37	14_51414306_T_C_b37	Independent	2.38207	NaN	NaN	0.54692	0.357253	0.736587	0.391333	0.168291	0.614376	0.938253	NaN	NaN
ADRNLG	ENSG00000259065.1	14_74275989_A_G_b37	14_74291381_A_G_b37	Independent	4.81218	NaN	NaN	1.76589	1.51126	2.02052	0.621614	0.384052	0.859176	2.38751	NaN	NaN
ADRNLG	ENSG00000140043.7	14_74552048_T_C_b37	14_74380990_G_C_b37	Independent	4.68213	NaN	NaN	-0.761727	-0.974646	-0.548807	0.43721	0.281322	0.593099	-0.324517	NaN	NaN
ADRNLG	ENSG00000183060.11	15_100271757_C_T_b37	15_100273617_T_C_b37	Independent	1.45581	NaN	NaN	-0.427852	-0.546341	-0.309363	0.335409	0.158088	0.512731	-0.0924431	NaN	NaN
ADRNLG	ENSG00000259658.3	15_102321805_G_A_b37	15_102320985_A_G_b37	Independent	4.82028	NaN	NaN	-1.63036	-1.95501	-1.30572	0.797693	0.451721	1.14366	-0.832671	NaN	NaN
ADRNLG	ENSG00000188626.5	15_28991043_G_A_b37	15_29428556_C_G_b37	Independent	3.85015	NaN	NaN	0	NaN	NaN	-0.988632	NaN	NaN	-0.988632	NaN	NaN
ADRNLG	ENSG00000140323.4	15_40655469_C_T_b37	15_40705417_G_A_b37	Independent	4.81218	NaN	NaN	2.76325	2.28682	3.23968	1.37339	0.899046	1.84774	4.13665	NaN	NaN
ADRNLG	ENSG00000128891.11	15_40875465_T_A_b37	15_40845597_A_G_b37	Independent	3.84095	NaN	NaN	-0.773733	-0.890681	-0.656784	0.368315	0.217612	0.519018	-0.405418	NaN	NaN
ADRNLG	ENSG00000157734.9	15_64601020_C_T_b37	15_65049021_G_T_b37	Independent	4.64439	NaN	NaN	0.958488	0.554776	1.3622	-0.91824	-1.25913	-0.577351	0.0402484	NaN	NaN
ADRNLG	ENSG00000260776.1	15_78233849_A_G_b37	15_78248191_A_G_b37	Independent	2.35137	NaN	NaN	2.89807	2.10442	3.69172	2.87837	2.13888	3.61787	5.77644	NaN	NaN
ADRNLG	ENSG00000103811.11	15_79237293_C_T_b37	15_79222149_A_G_b37	Independent	4.80402	NaN	NaN	-1.18933	-1.57863	-0.800022	-0.531257	-0.775237	-0.287276	-1.72058	NaN	NaN
ADRNLG	ENSG00000188659.5	15_82462544_C_T_b37	15_82500217_C_T_b37	Independent	4.82831	NaN	NaN	2.0751	1.6724	2.4778	-0.582549	-0.904142	-0.260957	1.49255	NaN	NaN
ADRNLG	ENSG00000259328.1	15_82469600_T_G_b37	15_83389397_C_T_b37	Independent	4.11848	NaN	NaN	-3.80422	-8.62635	1.01792	-0.969037	-1.37396	-0.564111	-4.77325	NaN	NaN
ADRNLG	ENSG00000225151.6	15_84833704_T_TG_b37	15_85728399_G_A_b37	Independent	1.05583	NaN	NaN	-0.859749	-1.17239	-0.547104	0.657948	0.420524	0.895372	-0.201801	NaN	NaN
ADRNLG	ENSG00000188388.9	15_85086986_G_A_b37	15_85447805_C_T_b37	Independent	4.30788	NaN	NaN	0.987582	0.69962	1.27554	-0.366418	-0.650618	-0.0822188	0.621163	NaN	NaN
ADRNLG	ENSG00000184206.7	15_85114237_G_C_b37	15_84867631_T_G_b37	Independent	-2.06889	-12.8849	4.62497	0.652963	0.433052	0.872875	-0.950922	-1.28343	-0.618416	-0.297959	NaN	NaN
ADRNLG	ENSG00000261616.1	15_99832718_C_T_b37	15_99714970_T_TA_b37	Independent	4.79579	NaN	NaN	0.735372	0.540544	0.9302	-1.02314	-1.58775	-0.458536	-0.287773	NaN	NaN
ADRNLG	ENSG00000260872.1	16_15117386_C_T_b37	16_14403625_TG_T_b37	Independent	4.76224	NaN	NaN	-6.64386	-68.849	55.5613	-2.01671	-3.22492	-0.808503	-8.66057	NaN	NaN
ADRNLG	ENSG00000156968.8	16_15498773_G_C_b37	16_15484744_C_G_b37	Independent	4.47734	NaN	NaN	0.858569	0.541139	1.176	-0.960984	-1.47497	-0.447001	-0.102415	NaN	NaN
ADRNLG	ENSG00000100726.10	16_1557888_T_G_b37	16_1539506_C_A_b37	Independent	4.78749	NaN	NaN	-0.361435	-0.538131	-0.18474	-0.389068	-0.598567	-0.179569	-0.750503	NaN	NaN
ADRNLG	ENSG00000103226.13	16_16298942_C_T_b37	16_16296488_G_A_b37	Independent	0.691483	NaN	NaN	-0.683679	-1.12602	-0.241341	-0.376853	-1.4314	0.677699	-1.06053	NaN	NaN
ADRNLG	ENSG00000255513.1	16_2013715_C_G_b37	16_2007728_T_G_b37	Independent	4.42465	NaN	NaN	1.62249	1.32729	1.91769	1.32368	0.866174	1.78119	2.94618	NaN	NaN
ADRNLG	ENSG00000059122.12	16_2986323_T_C_b37	16_2993820_C_A_b37	Independent	4.81219	NaN	NaN	0.784376	0.666956	0.901795	-0.728851	-1.12053	-0.337177	0.0555246	NaN	NaN
ADRNLG	ENSG00000149922.6	16_30103160_C_A_b37	16_30035806_C_T_b37	Independent	4.82831	NaN	NaN	1.17364	0.823224	1.52406	-0.418858	-0.593334	-0.244382	0.754785	NaN	NaN
ADRNLG	ENSG00000262468.1	16_4353395_C_T_b37	16_4273389_T_TA_b37	Independent	4.32552	NaN	NaN	0.513305	0.254829	0.771781	-0.334168	-0.690905	0.0225697	0.179138	NaN	NaN
ADRNLG	ENSG00000228695.5	16_55880639_C_T_b37	16_55794718_G_A_b37	Independent	4.70877	NaN	NaN	1.94074	1.29999	2.5815	1.39976	0.822059	1.97747	3.34051	NaN	NaN
ADRNLG	ENSG00000226232.4	16_70096436_G_T_b37	16_70112195_A_G_b37	Independent	4.64439	NaN	NaN	-0.722844	-0.914584	-0.531105	-0.970186	-1.44304	-0.49733	-1.69303	NaN	NaN
ADRNLG	ENSG00000267259.1	17_26793142_A_C_b37	17_26558422_A_C_b37	Independent	2.7151	NaN	NaN	-1.38188	-1.83056	-0.9332	-0.998321	-1.44257	-0.554074	-2.3802	NaN	NaN
ADRNLG	ENSG00000108381.6	17_3379815_T_C_b37	17_3416309_A_C_b37	Independent	4.43501	NaN	NaN	-0.74789	-0.984554	-0.511225	-0.744556	-1.06071	-0.428402	-1.49245	NaN	NaN
ADRNLG	ENSG00000161692.13	17_42760235_AT_A_b37	17_42786170_G_A_b37	Independent	4.79579	NaN	NaN	-1.23727	-1.52971	-0.944824	-0.726338	-1.16204	-0.290632	-1.9636	NaN	NaN
ADRNLG	ENSG00000214447.3	17_42956798_T_C_b37	17_42979592_G_A_b37	Independent	4.82831	NaN	NaN	0.794488	0.565092	1.02388	1.12447	0.818074	1.43087	1.91896	NaN	NaN
ADRNLG	ENSG00000176681.10	17_43687542_C_G_b37	17_44619118_G_A_b37	Independent	3.93183	NaN	NaN	-0.704457	-1.30672	-0.102192	0.94141	0.363917	1.5189	0.236953	NaN	NaN
ADRNLG	ENSG00000185829.11	17_44091988_T_C_b37	17_44852612_A_C_b37	Independent	4.80402	NaN	NaN	1.03909	0.769595	1.30858	0.870061	0.595296	1.14483	1.90915	NaN	NaN
ADRNLG	ENSG00000214401.4	17_44787312_C_T_b37	17_44852612_A_C_b37	Independent	4.82831	NaN	NaN	2.27071	2.0447	2.49672	0.882151	0.615587	1.14871	3.15286	NaN	NaN
ADRNLG	ENSG00000108823.11	17_48243736_G_A_b37	17_48245547_A_G_b37	Independent	2.74414	NaN	NaN	-1.99586	-2.47325	-1.51847	-1.07542	-1.59967	-0.551173	-3.07128	NaN	NaN
ADRNLG	ENSG00000006282.15	17_48624523_A_C_b37	17_48615329_G_A_b37	Independent	4.78749	NaN	NaN	-0.49536	-0.594651	-0.396068	-0.989078	-1.22729	-0.750866	-1.48444	NaN	NaN
ADRNLG	ENSG00000262877.3	17_79369165_C_T_b37	17_79361668_A_G_b37	Independent	4.68213	NaN	NaN	1.42419	1.03739	1.811	-1.02043	-1.31376	-0.727099	0.403763	NaN	NaN
ADRNLG	ENSG00000170310.10	17_9341204_C_T_b37	17_9463369_G_A_b37	Independent	4.49623	NaN	NaN	0.292394	0.171522	0.413266	0.120396	-0.00928275	0.250075	0.41279	NaN	NaN
ADRNLG	ENSG00000141401.7	18_11936355_G_A_b37	18_11993175_C_T_b37	Independent	4.75068	NaN	NaN	0.482644	0.313387	0.651902	-0.85901	-1.19336	-0.524664	-0.376365	NaN	NaN
ADRNLG	ENSG00000263753.2	18_5242237_C_T_b37	18_5214454_T_C_b37	Independent	4.75359	NaN	NaN	0.571273	0.421149	0.721398	0.333037	0.19771	0.468365	0.904311	NaN	NaN
ADRNLG	ENSG00000183287.9	18_57448955_G_A_b37	18_57209413_A_AAAG_b37	Independent	4.65396	NaN	NaN	0.79894	0.51391	1.08397	0.982176	0.452432	1.51192	1.78112	NaN	NaN
ADRNLG	ENSG00000261126.3	18_77729449_C_T_b37	18_77831140_G_A_b37	Independent	3.86932	NaN	NaN	-1.11222	-1.29125	-0.933198	-0.573477	-0.73282	-0.414134	-1.6857	NaN	NaN
ADRNLG	ENSG00000105397.9	19_10464687_A_G_b37	19_10492320_A_T_b37	Independent	3.78904	NaN	NaN	-0.355599	-0.496819	-0.214379	0.195944	0.0868143	0.305074	-0.159655	NaN	NaN
ADRNLG	ENSG00000129347.15	19_10678842_T_C_b37	19_10662068_A_G_b37	Independent	4.36473	NaN	NaN	-0.229973	-0.323596	-0.136351	0.465482	0.355084	0.57588	0.235508	NaN	NaN
ADRNLG	ENSG00000267056.2	19_16027857_A_T_b37	19_16045749_G_A_b37	Independent	4.47398	NaN	NaN	-4.18331	-4.63095	-3.73567	-2.01231	-2.60227	-1.42235	-6.19562	NaN	NaN
ADRNLG	ENSG00000171903.12	19_16052233_C_T_b37	19_16045749_G_A_b37	Independent	4.80402	NaN	NaN	-6.21361	-6.70282	-5.7244	-1.67564	-2.3122	-1.03908	-7.88925	NaN	NaN
ADRNLG	ENSG00000099330.4	19_17337025_C_T_b37	19_17329717_C_T_b37	Independent	4.7362	NaN	NaN	0.373049	0.23959	0.506509	-0.526267	-0.72428	-0.328254	-0.153218	NaN	NaN
ADRNLG	ENSG00000268081.1	19_21740932_T_C_b37	19_21757867_C_T_b37	Independent	-0.883981	-8.7794	4.4167	-2.08906	-2.57749	-1.60064	1.10679	0.506572	1.707	-0.982279	NaN	NaN
ADRNLG	ENSG00000141934.5	19_290947_C_A_b37	19_295919_G_C_b37	Independent	-2.25708	-26.3176	4.11088	2.92188	2.08262	3.76113	-1.46953	-2.83399	-0.105068	1.45235	NaN	NaN
ADRNLG	ENSG00000161265.10	19_36236909_G_C_b37	19_36200400_T_C_b37	Independent	4.82028	NaN	NaN	0.640736	0.525072	0.756401	-0.723743	-0.91925	-0.528235	-0.0830065	NaN	NaN
ADRNLG	ENSG00000256612.3	19_41415087_G_A_b37	19_42219895_G_A_b37	Independent	4.78749	NaN	NaN	1.32985	0.955374	1.70432	1.77065	0.957727	2.58357	3.1005	NaN	NaN
ADRNLG	ENSG00000099821.9	19_416205_T_C_b37	19_631639_AG_A_b37	Independent	4.60543	NaN	NaN	0.400963	0.261154	0.540771	0.167982	0.0261684	0.309796	0.568944	NaN	NaN
ADRNLG	ENSG00000129946.6	19_455878_C_A_b37	19_464310_A_G_b37	Independent	4.40672	NaN	NaN	-0.905263	-1.192	-0.618527	-2.14317	-2.75754	-1.52879	-3.04843	NaN	NaN
ADRNLG	ENSG00000142252.6	19_45594170_A_G_b37	19_45903597_C_T_b37	Independent	4.14492	NaN	NaN	-0.287808	-0.378993	-0.196624	-0.508412	-0.794112	-0.222712	-0.79622	NaN	NaN
ADRNLG	ENSG00000267395.1	19_46502717_T_G_b37	19_46267534_C_T_b37	Independent	3.88401	NaN	NaN	-0.507205	-0.693207	-0.321203	0.426952	0.242548	0.611356	-0.0802529	NaN	NaN
ADRNLG	ENSG00000182013.13	19_46975167_G_A_b37	19_46983215_A_T_b37	Independent	4.82127	NaN	NaN	-0.753432	-0.885072	-0.621791	0.0513429	-0.149442	0.252128	-0.702089	NaN	NaN
ADRNLG	ENSG00000130529.11	19_49667546_CCCTCCCTT_C_b37	19_49661582_T_C_b37	Independent	4.53449	NaN	NaN	0.59326	0.34836	0.838159	-0.651385	-1.04904	-0.253728	-0.0581257	NaN	NaN
ADRNLG	ENSG00000254415.3	19_52167906_G_C_b37	19_52165127_G_A_b37	Independent	4.82028	NaN	NaN	-6.64386	-246.348	233.06	4.67361	-234.756	244.103	-1.97024	NaN	NaN
ADRNLG	ENSG00000241015.2	19_53935160_G_A_b37	19_53944945_T_C_b37	Independent	2.9801	NaN	NaN	-0.702617	-0.905427	-0.499806	-0.581456	-0.780255	-0.382657	-1.28407	NaN	NaN
ADRNLG	ENSG00000250731.1	19_53973619_T_TA_b37	19_53943312_A_G_b37	Independent	4.74493	NaN	NaN	5.05641	3.92231	6.19051	-0.902682	-1.27454	-0.530825	4.15373	NaN	NaN
ADRNLG	ENSG00000269867.1	19_58744933_G_A_b37	19_58352522_G_A_b37	Independent	4.29907	NaN	NaN	1.06334	0.834288	1.29239	0.560313	0.317446	0.80318	1.62365	NaN	NaN
ADRNLG	ENSG00000099785.6	19_8516411_CTCCCCT_C_b37	19_8503621_T_G_b37	Independent	4.23742	NaN	NaN	0.251111	0.131472	0.37075	-0.266305	-0.396269	-0.136342	-0.0151947	NaN	NaN
ADRNLG	ENSG00000266912.1	19_9510415_T_C_b37	19_10370654_A_G_b37	Independent	3.1488	NaN	NaN	-0.833057	-1.19924	-0.466874	0.911157	0.429861	1.39245	0.0780998	NaN	NaN
ADRNLG	ENSG00000186148.7	2_111439128_C_T_b37	2_111400071_A_T_b37	Independent	4.60517	NaN	NaN	1.36295	0.625093	2.10081	-1.71486	-2.89184	-0.537889	-0.351911	NaN	NaN
ADRNLG	ENSG00000169629.7	2_113189333_C_G_b37	2_113231201_T_C_b37	Independent	4.58497	NaN	NaN	-1.37226	-1.75619	-0.988341	0.411382	0.199566	0.623197	-0.960882	NaN	NaN
ADRNLG	ENSG00000189223.9	2_113992800_TCC_T_b37	2_113477681_A_G_b37	Independent	3.52751	NaN	NaN	-3.64933	-4.31046	-2.9882	1.21257	0.496902	1.92825	-2.43676	NaN	NaN
ADRNLG	ENSG00000240356.2	2_114380985_G_A_b37	2_114412089_T_C_b37	Independent	-1.53472	-24.6052	4.58497	0.469913	0.295364	0.644463	-0.644036	-0.901779	-0.386292	-0.174122	NaN	NaN
ADRNLG	ENSG00000173272.9	2_132261385_G_GTGACTATAGGCA_b37	2_132232804_A_G_b37	Independent	4.59512	NaN	NaN	0.339351	0.119187	0.559515	-0.590867	-0.830817	-0.350917	-0.251516	NaN	NaN
ADRNLG	ENSG00000182263.9	2_164471196_G_A_b37	2_164449200_TTTAGTAGAAA_T_b37	Independent	2.69352	NaN	NaN	0.550297	0.373349	0.727245	-0.632974	-0.924928	-0.34102	-0.0826766	NaN	NaN
ADRNLG	ENSG00000115339.9	2_166710341_A_T_b37	2_166719996_C_G_b37	Independent	2.73006	NaN	NaN	0.955027	0.695762	1.21429	0.520693	0.298248	0.743137	1.47572	NaN	NaN
ADRNLG	ENSG00000128683.9	2_171689421_C_G_b37	2_171690121_T_C_b37	Independent	4.74493	NaN	NaN	-2.63625	-2.91984	-2.35266	-0.628556	-0.923575	-0.333537	-3.2648	NaN	NaN
ADRNLG	ENSG00000226363.3	2_177042087_A_G_b37	2_176936212_C_G_b37	Independent	4.53844	NaN	NaN	-1.62359	-2.25238	-0.994802	-2.53241	-4.21496	-0.849851	-4.156	NaN	NaN
ADRNLG	ENSG00000188452.9	2_182312809_T_A_b37	2_182356987_GTAAATA_G_b37	Independent	2.47492	NaN	NaN	-0.487243	-0.750769	-0.223718	-0.622778	-1.0983	-0.147254	-1.11002	NaN	NaN
ADRNLG	ENSG00000115457.5	2_217400448_C_T_b37	2_217348126_C_T_b37	Independent	-3.83567	-19.9307	4.8175	-1.3594	-1.59978	-1.11902	-0.597622	-0.890045	-0.305199	-1.95702	NaN	NaN
ADRNLG	ENSG00000144488.10	2_239035853_C_T_b37	2_239036270_C_T_b37	Independent	4.60517	NaN	NaN	1.80353	1.15419	2.45287	3.61904	3.11953	4.11855	5.42257	NaN	NaN
ADRNLG	ENSG00000180902.12	2_242689185_T_C_b37	2_242700960_G_A_b37	Independent	4.24327	NaN	NaN	-0.408524	-0.555111	-0.261938	-0.346238	-0.501407	-0.19107	-0.754763	NaN	NaN
ADRNLG	ENSG00000219626.4	2_24342532_G_A_b37	2_23334779_A_G_b37	Independent	-3.48924	-23.9059	3.98155	-0.794178	-0.969175	-0.61918	0.178196	0.0663243	0.290068	-0.615981	NaN	NaN
ADRNLG	ENSG00000234936.1	2_43494221_G_T_b37	2_43532524_C_T_b37	Independent	4.82028	NaN	NaN	2.84503	2.08061	3.60944	-2.02313	-2.76843	-1.27782	0.821898	NaN	NaN
ADRNLG	ENSG00000243244.1	2_48802896_TTG_T_b37	2_48760978_A_G_b37	Independent	2.28373	NaN	NaN	0.752353	0.515704	0.989002	-0.436051	-0.663024	-0.209078	0.316302	NaN	NaN
ADRNLG	ENSG00000225889.3	2_64493422_C_G_b37	2_64479841_G_C_b37	Independent	4.74275	NaN	NaN	-1.18555	-1.86001	-0.511095	-0.598165	-0.864205	-0.332125	-1.78372	NaN	NaN
ADRNLG	ENSG00000231435.1	2_8835105_G_A_b37	2_8717551_C_T_b37	Independent	0.329405	NaN	NaN	-2.0278	-3.21804	-0.837562	1.3019	0.577889	2.02591	-0.725905	NaN	NaN
ADRNLG	ENSG00000186281.8	2_97027554_A_ATATG_b37	2_96748054_A_G_b37	Independent	3.35877	NaN	NaN	-6.64385	-61.5363	48.2486	1.0457	0.642683	1.44872	-5.59815	NaN	NaN
ADRNLG	ENSG00000125818.13	20_1115919_A_G_b37	20_1098486_C_T_b37	Independent	4.82831	NaN	NaN	0.365906	0.246825	0.484988	0.190122	0.0977828	0.282461	0.556028	NaN	NaN
ADRNLG	ENSG00000197496.4	20_45345299_AG_A_b37	20_45180290_C_T_b37	Independent	3.70351	NaN	NaN	-0.703375	-0.881076	-0.525675	-0.480902	-0.679542	-0.282263	-1.18428	NaN	NaN
ADRNLG	ENSG00000087510.5	20_55336460_ATGC_A_b37	20_55365449_A_G_b37	Independent	4.65828	NaN	NaN	1.46894	1.06086	1.87702	1.01112	0.572093	1.45014	2.48006	NaN	NaN
ADRNLG	ENSG00000235772.1	21_43976103_G_T_b37	21_43967126_G_A_b37	Independent	4.82831	NaN	NaN	-3.34129	-3.96818	-2.71441	-1.06707	-1.42825	-0.705894	-4.40837	NaN	NaN
ADRNLG	ENSG00000184441.4	21_45759045_C_T_b37	21_45750346_C_A_b37	Independent	3.4795	NaN	NaN	0.717412	0.527831	0.906993	-0.48414	-0.722097	-0.246184	0.233272	NaN	NaN
ADRNLG	ENSG00000182362.9	21_47715106_T_G_b37	21_47753495_G_A_b37	Independent	4.51838	NaN	NaN	-0.499763	-0.685151	-0.314375	-0.521457	-0.696531	-0.346383	-1.02122	NaN	NaN
ADRNLG	ENSG00000160284.10	21_47754563_A_G_b37	21_47603995_A_G_b37	Independent	4.77068	NaN	NaN	-4.74686	-5.43201	-4.06171	5.08827	3.89682	6.27973	0.341412	NaN	NaN
ADRNLG	ENSG00000177663.9	22_17496296_T_C_b37	22_17601466_T_C_b37	Independent	3.50144	NaN	NaN	0.228613	0.106563	0.350663	-0.25403	-0.421195	-0.086864	-0.0254169	NaN	NaN
ADRNLG	ENSG00000232926.1	22_19882115_A_G_b37	22_19867189_T_C_b37	Independent	-3.75197	-26.4177	4.80019	0.903486	0.602881	1.20409	-0.769915	-1.14006	-0.399774	0.133571	NaN	NaN
ADRNLG	ENSG00000189269.8	22_23979763_A_G_b37	22_23978081_G_A_b37	Independent	4.76217	NaN	NaN	-1.87491	-2.22788	-1.52194	2.29316	1.42633	3.15999	0.41825	NaN	NaN
ADRNLG	ENSG00000099984.6	22_24266954_A_C_b37	22_24314006_G_T_b37	Independent	4.80402	NaN	NaN	-4.84091	-5.28726	-4.39456	1.43974	1.02112	1.85835	-3.40117	NaN	NaN
ADRNLG	ENSG00000184674.8	22_24269459_G_T_b37	22_24363102_T_C_b37	Independent	4.75359	NaN	NaN	6.64386	5.42598	7.86173	4.08049	1.05666	7.10432	10.7243	NaN	NaN
ADRNLG	ENSG00000100336.13	22_36597877_G_A_b37	22_36597552_G_A_b37	Independent	4.78749	NaN	NaN	-1.34668	-1.67833	-1.01502	-4.70214	-5.995	-3.40929	-6.04882	NaN	NaN
ADRNLG	ENSG00000100299.13	22_51063477_T_C_b37	22_50468122_G_T_b37	Independent	2.40189	NaN	NaN	-1.19514	-1.63965	-0.750616	0.270189	0.0523337	0.488045	-0.924946	NaN	NaN
[truncated: 21,255 more rows]

## Sheet: ReadMe
Column Name	Description
tissue	GTEx tissue short name
eGene	Ensembl ID
snp1	1st eQTL SNP, formatted as: Chr_Position_Ref_Alt_b37
snp2	2nd eQTL SNP, formatted as: Chr_Position_Ref_Alt_b37
Selected_Model	Selected model using BIC: Independent/Not Independent (Relaxed) model
dBIC	BIC (Not Independent model) – BIC(Independent model)
dBIC_LoCI_Bca	95% bootstrap Lower Bound for dBIC derived using Bca. This is only calculated when dBIC<0
dBIC_HiCI_Bca	95% bootstrap Upper Bound for dBIC derived using Bca. This is only calculated when dBIC<0
s_10	Effect size estimate for SNP1 (Log2 aFC)
s_10_LoCI	Effect size estimate 95% CI lower bound for SNP1 (Log2 aFC) derived using t-distribution
s_10_HiCI	Effect size estimate 95% CI upper bound for SNP1 (Log2 aFC) derived using t-distribution
s_01	Effect size estimate for SNP2 (Log2 aFC)
s_01_LoCI	Effect size estimate 95% CI lower bound for SNP2 (Log2 aFC) derived using t-distribution
s_01_HiCI	Effect size estimate 95% CI upper bound for SNP2 (Log2 aFC) derived using t-distribution
s_11	Joint effect size estimate for co-occurrence of alternative alleles at SNP1 and SNP2 (Log2 aFC). This is only available when independent model is rejected.
s_11_LoCI	Joint effect size estimate 95% CI lower bound for co-occurrence of alternative alleles at SNP1 and SNP2 (Log2 aFC) derived using t-distribution. This is only available when independent model is rejected.
s_11_HiCI	Joint effect size estimate 95% CI upper bound for co-occurrence of alternative alleles at SNP1 and SNP2 (Log2 aFC) derived using t-distribution. This is only available when independent model is rejected.
