# Supplementary material for: Quantifying the regulatory effect size of cis -acting genetic variation using allelic fold change
Source: HighWire-hosted journal article supplement (doi:10.1101/gr.216747.116), 2017-10-11
Supplement: Supplemental_Software_S1.zip [file README.pdf › Supplemental_Software_S1/aFC/README.pdf]

# aFC

## allelic Fold Change

Calculates allelic Fold Change (aFC) using standard input files for [fastQTL](#).

Please see our preprint in [bioRxiv](#) for details and benchmarking of the method.

Method developed by [Pejman Mohammadi](#), software by [Stephane E. Castel](#) both in the [Lappalainen Lab](#) at the New York Genome Center and Columbia University Department of Systems Biology.

Runs on Python 2.7.x and has the following dependencies: [pandas](#), [statsmodels](#), [scikits-bootstrap](#), [NumPy](#).

## Usage

Requires tabix indexed gzip compressed VCF file containing genotypes and BED file containing phenotypes, identical to the inputs of [fastQTL](#), and a list of QTL to calculate aFC for. If provided, covariates will be regressed out of the phenotype values. Outputs the aFC and corresponding 95% confidence interval for each input QTL.

## Arguments

### Required

- **--vcf** - Tabix indexed and gzipped VCF file containing sample genotypes. See [fastQTL](#) for format details.
- **--pheno** - Tabix indexed and gzipped BED file containing sample phenotypes. See [fastQTL](#) for format details.
- **--qtl** - File containing QTL to calculate allelic fold change for. Should contain tab separated columns 'pid' with phenotype (gene) IDs and 'sid' with SNP IDs. Optionally can include the columns 'sid\_chr' and 'sid\_pos', which will facilitate tabix retrieval of genotypes, greatly reducing runtime.
- **--geno** - Which field in VCF to use as the genotype. By default 'GT' = genotype. Setting to 'DS' will use dosage rounded to the nearest integer (IE  $1.75 = 2 = 1 \mid 1$ ).
- **--chr** - Limit to a specific chromosome.
- **--log\_xform** - The data has been log transformed (1/0). If so, please set --log\_base.
- **--o** - Output file.

### Optional

- **--cov (/)** - Covariates file. See [fastQTL](#) for format details.

- **--matrix\_o ()** - Output the raw data matrix used to calculate aFC for each QTL into the specific folder.
- **--boot (100)** - Number of bootstraps to perform for effect size confidence interval. Can be set to 0 to skip confidence interval calculation, which will greatly reduce runtimes.
- **--ecap ( $\log_2(100)$ )** - Absolute aFC cap in log2.
- **--log\_base (2)** - Base of log applied to data. If other than 2, data will be converted to log2.

## Output File

- 1 - **sid** - Variant ID.
- 2 - **pid** - Phenotype (gene) ID.
- 3 - **log2\_aFC** - allelic Fold Change in log2.
- 4 - **log2\_aFC\_lower** - Lower estimate of 95% confidence interval of log2(aFC).
- 5 - **log2\_aFC\_upper** - Upper estimate of 95% confidence interval of log2(aFC).
